# Supplementary material for: Primary Production in the Water Column as Major Structuring Element of the Biogeographical Distribution and Function of Archaea in Deep-Sea Sediments of the Central Pacific Ocean
Source: Archaea. 2019 Mar 3;2019:3717239. doi: 10.1155/2019/3717239 (PMC6421829; doi:10.1155/2019/3717239)
Supplement: Supplementary 1 — Data S1: R code example for PERMANOVA analysis with rarefied OTU tables. [file 3717239.f1.zip]

Archive with 3 entries (3 files):
- code.R
- env_table.txt
- otu_table.txt
