# Supplementary material for: Primary Production in the Water Column as Major Structuring Element of the Biogeographical Distribution and Function of Archaea in Deep-Sea Sediments of the Central Pacific Ocean
Source: Archaea. 2019 Mar 3;2019:3717239. doi: 10.1155/2019/3717239 (PMC6421829; doi:10.1155/2019/3717239)
Supplement: Supplementary 1 — Data S1: R code example for PERMANOVA analysis with rarefied OTU tables. [file 3717239.f1.zip › env_table.txt]

Station	Chlorophyll
St02	41.94
St04	87.77
St06	102.1
St08	66.48
St10	48.75
St12	52.33
St14	122.86
St16	120.5
St19	119.28
