# Supplementary material for: Primary Production in the Water Column as Major Structuring Element of the Biogeographical Distribution and Function of Archaea in Deep-Sea Sediments of the Central Pacific Ocean
Source: Archaea. 2019 Mar 3;2019:3717239. doi: 10.1155/2019/3717239 (PMC6421829; doi:10.1155/2019/3717239)
Supplement: Supplementary 1 — Data S1: R code example for PERMANOVA analysis with rarefied OTU tables. [file 3717239.f1.zip › otu_table.txt]

ID	St02	St04	St06	St08	St10	St12	St14	St16	St19
otu1633	0	0	2	0	0	3	0	1	0
otu1947	0	0	0	1	0	1	0	0	0
otu1081	0	0	0	1	0	0	1	0	0
otu1446	0	0	0	3	0	0	2	0	0
otu2393	0	0	0	0	0	0	0	0	0
otu2745	0	0	0	0	0	0	0	0	0
otu3056	4	0	0	0	0	0	0	0	0
otu458	0	0	3	0	0	0	2	3	1
otu1222	0	0	2	1	0	1	7	3	3
otu2707	0	0	1	1	0	0	0	1	0
otu3220	0	0	1	0	1	1	0	0	1
otu1810	0	0	1	0	0	1	1	0	0
otu2820	0	0	0	3	1	1	1	1	0
otu2959	0	0	0	1	0	0	1	1	0
otu758	0	0	0	0	0	0	3	1	1
otu3384	0	2	0	0	0	0	0	0	0
otu3147	8	0	0	4	0	0	4	0	3
otu2801	12	18	1	2	0	12	0	0	0
otu2567	12	23	5	0	0	19	0	0	0
otu2949	0	0	9	11	0	0	4	0	0
otu2354	0	0	0	30	0	0	0	0	0
otu3501	8	45	12	0	0	0	13	6	2
otu2475	0	0	0	41	0	0	0	0	0
otu2550	0	0	0	27	0	0	0	0	0
otu1999	15	19	0	0	3	1	0	0	0
otu227	16	9	7	44	16	8	0	1	0
otu1046	17	21	0	0	1	0	0	0	0
otu1347	16	19	0	2	2	0	0	0	0
otu957	2	9	1	0	1	0	0	1	0
otu357	16	8	1	29	4	2	0	1	0
otu201	21	5	2	31	4	4	0	2	0
otu2173	8	5	1	8	2	3	0	0	0
otu3233	9	6	0	0	2	0	0	0	0
otu154	6	11	5	25	10	12	0	0	0
otu766	7	3	2	7	4	7	0	1	0
otu1315	1	4	3	0	2	0	0	0	0
otu1831	0	0	0	0	10	9	0	0	0
otu426	26	17	11	17	4	3	2	5	0
otu1057	12	10	4	17	3	0	2	2	0
otu1993	5	1	8	4	2	5	5	2	0
otu1463	2	0	0	0	29	19	1	1	0
otu2046	6	1	4	1	2	2	6	1	0
otu407	7	7	9	4	1	3	3	13	0
otu2505	4	3	0	6	1	0	5	1	0
otu867	4	4	4	0	2	5	5	4	1
otu803	5	14	3	14	0	0	1	2	0
otu2534	1	1	0	0	0	1	4	1	0
otu492	0	4	8	3	3	7	8	7	0
otu1764	0	0	1	0	0	0	10	0	0
otu2153	0	0	1	0	0	0	9	0	0
otu2154	0	0	0	0	10	21	1	0	0
otu58	25	27	22	192	1	2	12	7	0
otu120	7	16	9	204	4	3	6	2	0
otu339	14	11	17	46	1	0	6	6	0
otu627	6	5	6	51	0	2	5	1	0
otu99	8	14	14	250	1	2	12	8	0
otu86	17	26	27	184	0	0	25	14	0
otu2619	0	0	23	0	1	0	1	0	0
otu3284	0	2	0	0	0	0	0	0	0
otu148	1	16	27	2	49	63	43	14	0
otu69	1	14	42	3	99	92	54	29	0
otu156	70	98	20	11	39	1	5	5	0
otu55	47	90	125	11	56	42	58	57	1
otu1447	2	0	0	0	1	26	0	0	12
otu94	109	129	31	23	80	5	16	13	0
otu671	10	28	5	22	9	1	0	2	1
otu926	2	14	21	0	32	6	14	16	6
otu19	64	132	213	72	77	72	106	64	2
otu233	41	76	21	5	30	4	8	7	0
otu14	107	245	332	61	115	111	172	126	2
otu686	9	27	14	17	8	1	1	4	0
otu2323	3	5	8	0	9	1	1	1	0
otu88	105	127	32	8	65	5	8	6	0
otu16	19	79	169	4	41	170	171	198	464
otu520	3	10	25	1	3	7	18	7	2
otu845	3	6	6	5	5	8	2	3	42
otu167	58	87	29	6	37	2	10	8	0
otu272	4	4	52	15	0	0	21	8	0
otu5	62	171	370	12	128	462	515	417	1154
otu3473	3	5	6	12	5	8	14	3	2
otu707	4	30	18	5	29	15	15	15	19
otu17	94	175	312	35	101	94	143	119	6
otu27	11	54	87	9	26	125	101	91	286
otu2830	1	5	1	0	11	0	0	0	0
otu100	8	9	100	26	0	0	50	29	0
otu1487	6	3	1	12	10	0	0	0	0
otu29	46	139	191	63	80	46	88	68	2
otu250	4	17	31	0	7	10	37	9	4
otu433	31	46	13	6	24	1	3	2	0
otu11	32	110	195	14	73	230	242	213	585
otu9	38	100	194	17	67	305	289	219	664
otu1093	4	12	9	0	5	4	2	1	0
otu2011	3	15	11	0	2	1	4	9	1
otu674	4	7	19	1	8	5	0	2	0
otu7	65	174	324	13	109	463	421	322	1075
otu1798	3	0	6	0	0	9	13	10	13
otu2649	5	0	0	0	15	1	0	2	0
otu924	3	3	17	0	5	7	9	6	4
otu2474	8	7	8	9	8	7	24	5	2
otu1137	2	6	4	0	3	0	8	10	2
otu1826	4	3	2	18	0	0	0	0	0
otu995	9	3	3	16	9	2	1	0	0
otu1518	1	5	7	0	1	6	8	4	3
otu134	2	1	35	0	0	2	29	48	0
otu1690	8	29	0	0	0	0	0	2	0
otu197	5	6	89	5	0	0	32	24	0
otu571	2	1	8	1	3	14	5	12	45
otu831	2	15	19	2	0	1	6	15	1
otu189	4	48	46	4	58	25	28	58	49
otu303	4	32	45	13	49	18	29	29	46
otu133	19	79	63	17	30	28	30	30	1
otu366	3	3	7	2	3	5	0	11	70
otu168	5	56	59	3	52	24	32	74	69
otu1345	5	3	6	0	1	0	1	3	2
otu684	2	1	7	0	1	8	2	10	33
otu105	4	1	56	0	0	2	31	44	0
otu1856	8	7	4	1	5	0	0	2	0
otu2352	3	3	0	0	13	4	2	3	5
otu181	3	3	7	0	1	0	2	22	129
otu1717	5	0	0	0	28	10	0	0	0
otu693	4	7	36	5	0	0	13	8	0
otu574	4	1	14	0	7	8	2	3	11
otu2013	1	0	10	0	5	14	8	3	13
otu2427	1	6	9	0	2	2	3	14	1
otu139	1	1	0	0	3	27	0	6	147
otu3320	2	0	0	0	0	7	0	0	4
otu718	13	15	2	15	9	0	2	0	0
otu3352	1	2	0	6	4	0	0	0	0
otu172	4	16	33	1	9	20	36	15	10
otu1505	3	3	4	0	5	0	8	25	20
otu285	2	0	0	0	2	19	0	6	88
otu1800	2	2	0	0	19	5	0	0	0
otu2456	2	9	0	0	16	0	1	0	1
otu1236	2	9	41	0	5	5	18	47	19
otu395	1	4	13	0	1	2	6	6	6
otu3360	1	2	0	0	2	4	0	0	5
otu1541	2	7	7	0	6	0	1	1	0
otu214	2	26	6	0	80	42	7	7	0
otu2641	2	5	3	9	0	3	0	0	0
otu2908	1	0	1	15	0	2	0	1	0
otu865	12	7	10	6	6	0	0	0	0
otu572	1	4	14	0	0	1	5	11	5
otu451	3	9	11	0	6	11	8	1	11
otu317	1	0	16	1	0	1	21	38	0
otu160	1	3	9	0	1	11	6	16	123
otu533	2	8	18	0	1	2	8	27	69
otu856	2	6	48	2	7	2	15	48	13
otu1157	2	3	6	0	6	7	3	2	4
otu1509	1	7	0	0	15	5	0	2	0
otu79	1	8	32	0	43	37	39	71	26
otu2116	1	6	3	0	1	1	5	3	2
otu152	2	0	0	0	6	32	1	5	126
otu938	1	5	0	0	0	0	5	18	0
otu338	5	5	13	0	0	24	32	8	7
otu59	1	20	52	2	82	117	60	31	0
otu836	2	11	17	0	10	2	1	6	0
otu409	2	15	2	0	46	14	10	2	0
otu578	1	15	27	2	1	3	6	17	1
otu804	1	0	0	0	0	27	0	0	10
otu3541	1	0	1	0	0	0	7	8	0
otu1513	1	12	36	1	8	1	15	44	14
otu1123	1	1	0	0	0	6	1	1	41
otu1203	1	0	1	0	0	11	2	5	23
otu1593	3	2	0	0	4	1	7	7	11
otu1619	1	5	2	0	18	9	0	2	4
otu1544	1	2	7	0	0	1	4	9	1
otu53	2	10	30	0	77	70	40	68	29
otu1456	1	7	6	9	5	1	1	3	0
otu2384	2	4	5	0	5	0	2	3	0
otu2634	1	0	0	5	0	0	0	0	0
otu2622	1	2	1	0	2	11	0	0	8
otu1643	1	1	0	1	3	4	3	6	14
otu2370	1	2	6	0	13	1	0	2	0
otu264	1	0	0	0	3	16	1	5	71
otu1336	1	0	0	0	0	21	0	0	16
otu173	1	3	21	0	39	29	18	46	14
otu195	4	23	6	0	89	29	14	7	0
otu844	1	0	11	0	0	0	9	18	0
otu1940	1	4	3	0	1	2	0	4	22
otu1042	1	7	0	0	11	16	0	0	16
otu552	1	17	1	0	30	18	6	3	0
otu2805	1	0	4	1	1	2	9	0	18
otu333	0	8	34	16	0	0	17	10	0
otu2017	0	9	1	0	2	1	2	7	15
otu1986	0	7	1	0	10	3	2	2	5
otu371	0	7	0	0	2	10	0	0	75
otu1357	0	9	2	0	2	4	4	5	11
otu562	0	7	10	5	4	0	33	7	1
otu1118	0	8	6	0	14	4	13	15	7
otu316	0	1	1	0	0	17	3	10	97
otu2543	0	6	2	0	3	0	2	7	5
otu246	0	9	18	0	48	43	18	13	0
otu1100	0	5	0	0	16	9	0	0	14
otu3394	0	1	0	0	0	0	2	2	7
otu1586	0	3	0	0	11	8	1	0	11
otu349	0	10	3	0	58	19	3	1	0
otu226	0	3	26	6	4	1	58	9	3
otu3245	0	2	2	1	0	0	0	1	4
otu1019	0	20	16	3	9	5	10	20	3
otu713	0	6	2	0	14	14	0	3	21
otu157	0	11	22	1	37	44	21	66	22
otu1395	0	13	1	0	2	3	2	7	8
otu261	0	5	13	0	29	24	22	55	16
otu2608	0	6	0	0	10	0	0	0	1
otu1612	0	4	3	0	3	8	3	2	5
otu1021	0	5	16	9	0	1	10	9	0
otu879	0	1	1	0	0	2	0	2	52
otu283	0	3	0	0	3	15	0	0	78
otu379	0	1	0	0	2	13	1	3	56
otu655	0	3	5	0	3	21	2	2	32
otu2274	0	4	11	0	0	0	6	0	0
otu2769	0	3	4	0	3	1	3	1	3
otu558	0	12	16	4	15	4	7	18	6
otu756	0	1	19	0	0	4	22	119	48
otu2633	0	6	3	0	1	4	2	3	6
otu474	0	1	14	2	0	5	27	11	9
otu741	0	5	0	0	1	9	0	0	44
otu595	0	6	5	0	27	22	2	2	0
otu132	0	9	27	2	63	75	43	26	0
otu2019	0	4	4	0	0	3	2	3	3
otu2227	0	3	26	0	4	0	4	26	13
otu902	0	1	7	0	5	15	1	3	40
otu615	0	3	6	0	23	16	22	24	4
otu1131	0	1	8	0	1	0	16	7	10
otu3064	0	1	0	8	0	0	0	0	0
otu362	0	2	8	0	0	0	15	21	5
otu465	0	5	11	0	23	29	15	2	0
otu500	0	2	9	0	0	0	2	12	45
otu1184	0	1	7	1	0	0	3	10	2
otu1515	0	2	3	0	12	6	0	1	0
otu919	0	1	15	0	1	2	4	4	2
otu1368	0	2	1	0	1	5	13	25	0
otu633	0	2	1	0	0	2	21	47	0
otu659	0	2	6	0	0	1	13	14	0
otu322	0	4	1	0	0	0	0	6	98
otu1404	0	1	4	0	0	10	11	26	4
otu1141	0	5	1	1	4	12	2	5	11
otu2914	0	3	2	0	7	2	0	1	1
otu2672	0	1	2	0	0	4	0	4	19
otu1919	0	1	1	0	0	0	5	7	0
otu1097	0	1	0	1	1	5	0	0	29
otu871	0	2	10	0	0	12	6	5	1
otu522	0	1	3	0	0	8	18	36	0
otu1010	0	2	5	0	0	13	2	5	26
otu950	0	1	0	0	2	3	0	2	31
otu115	0	1	3	0	0	3	0	5	169
otu1807	0	1	0	0	2	4	0	0	23
otu811	0	1	0	0	1	5	0	0	44
otu1895	0	5	2	0	0	1	1	3	2
otu2957	0	1	4	0	0	1	3	0	0
otu1029	0	1	4	0	0	0	7	5	1
otu2328	0	2	4	0	0	0	2	5	1
otu1005	0	2	5	0	0	0	8	7	2
otu3158	0	1	2	0	0	1	4	5	6
otu1777	0	2	3	0	0	0	2	2	5
otu270	0	1	26	5	2	0	36	12	4
otu1801	0	1	0	0	2	1	0	5	5
otu2121	0	0	8	0	0	5	3	19	94
otu2424	0	0	11	1	0	5	7	11	53
otu921	0	0	4	0	10	13	8	6	3
otu649	0	0	17	0	1	1	30	102	57
otu731	0	0	13	1	0	4	11	17	7
otu2005	0	0	5	0	0	0	12	2	2
otu1494	0	0	3	0	0	0	16	7	0
otu999	0	0	5	0	0	0	4	12	0
otu1604	0	0	7	0	0	0	6	11	7
otu267	0	0	25	2	0	0	22	25	0
otu3235	0	0	4	0	0	0	3	7	7
otu1528	0	0	6	0	0	0	8	6	2
otu1859	0	0	1	0	0	0	0	1	26
otu1545	0	0	2	0	3	11	0	5	28
otu1686	0	0	22	1	0	2	18	83	25
otu1519	0	0	8	0	0	0	11	2	0
otu2103	0	0	26	0	1	2	3	27	4
otu2416	0	0	3	0	0	0	1	9	23
otu2195	0	0	6	0	0	0	0	1	2
otu746	0	0	1	0	0	6	2	3	25
otu1358	0	0	15	0	0	1	16	11	1
otu217	0	0	1	0	0	0	23	29	2
otu3077	0	0	5	0	0	4	6	2	9
otu915	0	0	4	0	0	0	6	18	0
otu681	0	0	14	0	0	0	8	9	1
otu1752	0	0	4	3	1	9	12	7	16
otu113	0	0	2	0	0	2	2	4	182
otu748	0	0	8	0	0	0	10	4	2
otu1271	0	0	3	0	0	2	11	22	1
otu203	0	0	1	0	0	0	45	42	0
otu529	0	0	7	0	0	0	17	11	0
otu710	0	0	2	0	1	15	2	7	44
otu2538	0	0	5	0	0	0	7	2	4
otu54	0	0	3	0	0	0	81	81	0
otu872	0	0	4	0	0	0	14	13	1
otu2398	0	0	2	0	2	0	12	3	2
otu1287	0	0	2	0	0	0	6	7	0
otu1780	0	0	3	0	0	0	3	6	2
otu2859	0	0	1	0	0	0	1	8	9
otu274	0	0	7	0	22	34	6	28	4
otu2213	0	0	10	0	0	1	6	50	63
otu271	0	0	2	0	4	14	3	2	56
otu2312	0	0	5	0	0	0	0	0	0
otu269	0	0	1	0	0	0	17	36	2
otu747	0	0	13	0	0	0	23	7	4
otu779	0	0	8	3	1	0	25	9	0
otu1094	0	0	3	0	0	5	49	7	0
otu2050	0	0	7	0	0	0	0	0	0
otu449	0	0	3	0	22	40	17	21	4
otu1302	0	0	2	0	0	0	2	3	29
otu439	0	0	3	0	1	1	1	11	55
otu3522	0	0	3	0	2	0	0	9	13
otu1945	0	0	2	0	2	1	0	5	8
otu1409	0	0	1	0	0	3	2	2	18
otu2009	0	0	5	0	0	0	4	10	0
otu2860	0	0	2	0	0	0	0	0	11
otu326	0	0	1	0	3	3	0	6	75
otu849	0	0	1	0	2	4	6	6	18
otu619	0	0	2	0	11	22	6	6	3
otu486	0	0	2	0	0	0	1	10	67
otu2502	0	0	4	0	3	0	1	4	0
otu1466	0	0	7	0	1	2	1	6	1
otu2617	0	0	2	0	0	1	0	2	6
otu887	0	0	1	0	0	0	26	16	0
otu2171	0	0	4	15	0	0	0	0	0
otu1608	0	0	7	17	0	0	0	0	0
otu1458	0	0	2	0	0	0	0	0	21
otu1706	0	0	3	0	0	0	9	21	0
otu513	0	0	3	0	0	0	6	26	1
otu1555	0	0	4	0	0	1	12	2	2
otu3418	0	0	1	0	0	0	0	0	1
otu1177	0	0	2	0	0	0	7	14	0
otu2525	0	0	1	0	0	0	4	8	0
otu1080	0	0	2	0	0	0	0	1	45
otu413	0	0	2	0	5	17	5	10	29
otu1907	0	0	1	0	0	0	0	1	34
otu3359	0	0	1	0	0	0	0	0	8
otu296	0	0	3	0	2	17	11	7	33
otu2059	0	0	5	0	0	0	11	7	0
otu2223	0	0	1	0	0	2	0	1	15
otu380	0	0	1	0	0	1	0	2	77
otu1893	0	0	1	28	0	0	0	0	0
otu463	0	0	2	0	2	5	0	0	51
otu640	0	0	1	0	0	0	0	3	51
otu236	0	0	1	0	0	3	0	5	111
otu2070	0	0	1	0	4	8	3	9	0
otu2243	0	0	2	0	0	0	1	8	24
otu715	0	0	1	0	1	10	5	2	16
otu775	0	0	1	0	0	0	8	15	0
otu1644	0	0	1	0	0	0	0	3	28
otu1204	0	0	2	0	6	9	7	9	0
otu3484	0	0	1	0	0	0	0	0	12
otu800	0	0	1	0	1	11	0	7	43
otu708	0	0	1	0	0	0	14	18	0
otu3093	0	0	1	0	0	0	2	5	3
otu1087	0	0	0	0	3	2	0	1	21
otu3333	0	0	0	0	16	0	1	3	1
otu418	0	0	0	0	7	19	1	8	42
otu294	0	0	0	0	5	5	0	1	78
otu3082	0	0	0	0	20	4	0	0	0
otu666	0	0	0	0	2	3	0	0	59
otu1454	0	0	0	0	3	1	0	0	35
otu411	0	0	0	0	5	1	0	0	75
otu638	0	0	0	0	4	3	0	0	42
otu1411	0	0	0	0	1	7	0	4	18
otu1532	0	0	0	0	1	0	0	0	46
otu913	0	0	0	0	4	4	0	2	35
otu3354	0	0	0	0	2	0	0	0	15
otu2420	0	0	0	0	1	0	0	0	18
otu3403	0	0	0	0	5	0	3	6	0
otu1731	0	0	0	0	2	0	0	0	28
otu1444	0	0	0	0	3	4	4	3	5
otu911	0	0	0	0	1	0	0	0	46
otu2661	0	0	0	0	1	0	0	0	16
otu545	0	0	0	0	2	4	0	0	44
otu1011	0	0	0	0	1	4	0	0	35
otu676	0	0	0	0	1	1	0	0	53
otu767	0	0	0	0	1	2	0	0	50
otu1121	0	0	0	0	1	1	0	1	47
otu2725	0	0	0	0	2	0	0	0	15
otu2512	0	0	0	0	0	10	0	0	8
otu1269	0	0	0	0	0	5	0	0	22
otu1191	0	0	0	0	0	4	1	1	21
otu969	0	0	0	0	0	3	1	0	26
otu732	0	0	0	0	0	1	2	10	46
otu3508	0	0	0	0	0	1	0	0	11
otu759	0	0	0	0	0	3	0	1	25
otu1870	0	0	0	0	0	1	0	0	19
otu1603	0	0	0	0	0	2	3	2	10
otu2422	0	0	0	0	0	1	0	0	17
otu416	0	0	0	0	0	0	27	29	0
otu996	0	0	0	0	0	0	8	3	1
otu2436	0	0	0	0	0	0	3	6	0
otu521	0	0	0	0	0	0	14	2	0
otu84	0	0	0	0	0	0	70	68	1
otu256	0	0	0	0	0	0	35	37	0
otu853	0	0	0	0	0	0	4	16	0
otu1854	0	0	0	0	0	0	1	3	0
otu3003	0	0	0	0	0	0	1	4	12
otu2353	0	0	0	0	0	0	2	12	0
otu690	0	0	0	0	0	0	7	25	0
otu1812	0	0	0	0	0	0	0	2	24
otu328	0	0	0	0	0	0	0	2	57
otu959	0	0	0	0	0	0	0	0	47
otu499	0	0	0	0	0	0	0	0	52
otu390	0	0	0	0	0	0	0	0	53
otu719	0	0	0	0	0	0	0	0	35
otu506	0	0	0	0	0	0	0	0	73
otu3211	0	0	0	0	0	0	0	0	24
otu898	0	0	0	0	0	0	0	0	36
otu888	0	0	0	0	0	0	0	0	33
otu2264	0	0	0	0	0	0	0	0	20
otu1471	0	0	0	0	0	0	0	0	49
otu2119	0	0	0	0	0	0	0	0	40
otu3138	0	0	0	0	0	0	0	0	15
otu962	0	0	0	0	0	0	0	0	60
otu3229	0	0	0	0	0	0	0	0	25
otu3266	0	0	0	0	0	0	0	0	8
otu3265	0	0	0	0	0	0	0	0	17
otu973	0	0	0	0	0	0	0	0	46
otu3310	0	0	0	0	0	0	0	0	13
otu1883	0	0	0	0	0	0	0	0	14
otu1015	0	0	0	0	0	0	0	0	28
otu1674	0	0	0	0	0	0	0	0	17
otu1226	0	0	0	0	0	0	0	0	54
otu2933	0	0	0	0	0	0	0	0	20
otu2208	0	0	0	0	0	0	0	0	16
otu1648	0	0	0	0	0	0	0	0	21
otu2972	0	0	0	0	0	0	0	0	11
otu2313	0	0	0	0	0	0	0	0	24
otu3238	0	0	0	0	0	0	0	0	14
otu2217	0	0	0	0	0	0	0	0	17
otu2314	0	3	1	0	3	9	0	0	0
otu2052	0	7	0	0	5	8	0	1	0
otu1620	0	3	2	0	2	9	2	3	0
otu8	34	158	360	4	41	86	490	590	279
otu1256	5	2	9	17	0	0	0	1	0
otu662	15	10	5	23	0	0	0	2	0
otu2275	3	0	2	0	7	1	0	1	3
otu292	2	6	2	0	0	0	10	31	6
otu1326	9	25	2	7	3	0	0	0	0
otu6	37	134	373	3	23	89	570	612	293
otu946	2	4	5	27	0	0	0	0	0
otu12	12	89	214	4	13	58	309	344	158
otu40	3	59	75	2	11	27	110	163	69
otu2379	5	11	5	5	1	0	0	0	0
otu560	9	9	8	14	0	0	4	2	0
otu2265	3	18	0	4	3	0	0	0	0
otu556	1	0	19	2	0	0	8	2	0
otu18	16	64	164	3	17	42	192	281	122
otu10	13	107	222	7	16	67	348	306	163
otu2128	1	2	2	17	0	0	1	0	0
otu1990	1	2	15	0	0	0	13	2	0
otu391	4	9	15	1	1	1	32	37	1
otu778	1	5	8	0	1	0	17	15	0
otu2764	1	2	3	11	3	2	0	0	2
otu2521	1	1	0	1	2	0	0	0	2
otu1030	1	6	5	13	5	0	5	3	0
otu254	1	3	1	0	0	3	10	30	19
otu3276	0	3	4	1	0	0	1	9	0
otu1189	0	6	5	9	10	1	1	0	0
otu3370	0	7	2	3	1	0	0	0	0
otu519	0	3	1	0	0	7	9	20	5
otu2226	0	1	7	0	0	2	1	1	0
otu1742	0	3	8	1	0	0	7	5	0
otu1582	0	1	0	2	3	0	0	1	1
otu1614	0	2	2	1	1	0	15	14	0
otu1530	0	2	6	0	2	1	25	16	1
otu3527	0	0	7	9	0	0	1	0	0
otu1755	0	0	8	10	1	0	2	1	0
otu1863	0	0	1	0	0	0	2	8	6
otu2165	0	0	10	0	0	0	9	7	0
otu265	0	0	23	1	0	0	99	52	1
otu186	0	0	9	0	0	0	19	51	12
otu171	0	0	5	0	0	1	24	52	15
otu1224	0	0	4	0	0	1	2	25	5
otu1937	0	0	17	0	0	0	4	3	0
otu363	0	0	7	0	0	1	17	34	8
otu47	0	0	10	0	0	3	46	90	23
otu65	0	0	7	0	0	6	28	64	15
otu1957	0	0	10	0	0	0	8	4	0
otu1575	0	0	8	3	0	0	3	1	0
otu1032	0	0	19	3	0	0	7	3	0
otu700	0	0	4	0	0	1	5	21	2
otu1871	0	0	3	0	0	0	14	3	0
otu1258	0	0	1	0	0	2	4	22	5
otu2514	0	0	0	0	0	1	0	5	19
otu893	0	0	0	0	0	0	0	0	53
otu660	0	0	0	0	0	0	0	0	58
otu253	0	0	0	0	0	0	0	0	89
otu1640	0	0	0	0	0	0	0	0	46
otu319	0	0	0	0	0	0	0	0	91
otu1762	0	0	0	0	0	0	0	0	29
otu2584	0	0	0	0	0	0	0	0	29
otu3331	0	0	0	0	0	0	0	0	36
otu749	0	0	0	0	0	0	0	0	45
otu1099	0	0	0	0	0	0	0	0	41
otu965	5	14	12	26	6	0	1	1	0
otu244	15	38	14	5	36	7	16	9	1
otu87	8	10	6	1	6	6	10	25	21
otu24	39	80	59	23	178	129	80	114	82
otu282	12	34	24	4	8	5	16	8	1
otu399	29	16	26	11	5	1	10	3	0
otu67	28	64	94	54	15	18	45	35	2
otu1501	9	10	9	0	2	5	4	6	0
otu30	38	102	50	17	178	106	75	88	89
otu694	14	6	4	21	1	0	0	0	0
otu496	30	12	22	11	8	5	18	6	0
otu49	36	110	75	53	39	22	61	43	5
otu135	21	43	55	73	20	12	22	27	1
otu191	3	4	33	0	0	0	28	15	2
otu68	26	69	42	17	105	66	46	56	43
otu2291	10	3	3	2	10	0	3	2	0
otu702	25	20	20	11	4	7	7	8	1
otu121	27	47	38	1	21	17	19	15	4
otu680	6	20	33	24	1	2	13	31	25
otu1168	5	4	3	0	4	2	3	4	4
otu1766	4	20	8	2	5	0	1	1	0
otu603	28	8	16	20	2	0	0	0	0
otu884	20	12	15	13	3	3	7	0	0
otu73	6	12	8	0	3	5	15	16	20
otu936	10	7	2	23	0	0	0	0	0
otu122	12	66	34	7	89	47	41	64	42
otu422	10	32	10	21	6	6	0	1	0
otu435	9	15	23	5	4	6	11	15	4
otu92	20	75	35	16	85	64	34	57	45
otu2201	5	12	6	0	2	1	0	0	0
otu1621	2	18	2	3	3	0	0	0	0
otu136	31	49	39	8	34	18	22	25	0
otu2024	3	5	0	6	1	0	0	0	0
otu128	24	44	43	66	16	12	22	26	5
otu620	17	16	4	22	0	0	1	1	0
otu931	3	22	7	5	5	6	0	0	1
otu3478	5	2	0	3	0	0	0	0	0
otu1892	5	5	1	3	14	1	0	3	1
otu663	7	17	17	4	4	4	8	8	1
otu3026	24	5	1	0	0	0	0	0	0
otu1281	1	5	2	26	1	0	0	0	0
otu258	4	7	6	1	0	6	4	10	7
otu590	4	27	14	15	12	3	9	7	1
otu175	5	10	5	3	4	6	7	11	11
otu137	19	34	49	8	22	7	21	13	4
otu402	11	20	29	9	14	3	15	19	1
otu1051	3	3	4	24	2	0	1	1	0
otu1694	6	4	5	6	13	2	1	4	1
otu2559	1	7	6	4	0	0	6	1	0
otu376	8	28	22	5	14	4	20	15	5
otu1773	1	2	1	11	3	0	1	1	0
otu266	7	48	21	3	50	19	22	33	29
otu164	5	33	5	153	0	0	1	2	0
otu237	16	25	32	3	10	7	18	14	3
otu470	2	18	7	32	0	2	0	2	18
otu151	3	44	15	111	0	0	1	0	0
otu1702	1	7	3	0	0	3	0	7	1
otu2001	7	5	7	0	0	2	7	2	0
otu930	2	3	7	0	0	6	2	6	10
otu478	10	17	16	0	7	5	10	8	0
otu472	3	17	12	32	0	0	0	0	0
otu1979	2	6	10	9	2	1	3	12	14
otu377	4	32	14	24	0	1	0	3	40
otu138	2	1	38	0	0	0	47	21	3
otu295	1	0	9	0	1	1	20	19	1
otu1225	9	5	13	1	23	3	1	4	4
otu3085	1	6	6	1	0	2	1	3	0
otu405	10	8	6	0	0	4	6	13	9
otu3532	2	0	3	9	0	0	0	0	0
otu153	3	27	7	143	0	0	0	2	0
otu3014	6	0	1	0	2	0	1	4	13
otu3281	5	0	0	0	2	0	1	1	19
otu414	4	23	11	24	0	1	0	7	29
otu1534	2	15	12	4	0	0	6	3	0
otu796	6	28	3	6	14	4	2	1	1
otu1697	2	9	3	2	6	1	1	5	2
otu927	7	9	8	1	17	5	6	7	0
otu3191	4	0	13	2	0	0	1	2	0
otu206	1	0	8	1	1	1	20	26	4
otu1960	6	6	1	12	3	0	0	0	0
otu1110	2	11	19	7	0	1	1	21	30
otu3059	3	0	1	0	2	11	3	3	0
otu1383	4	13	8	0	0	0	10	5	0
otu3260	4	11	1	5	3	0	0	0	0
otu2770	6	17	13	0	22	13	10	17	3
otu1285	2	14	11	13	1	1	1	1	0
otu3143	1	6	2	1	0	3	0	0	3
otu2768	2	17	1	2	1	0	0	1	0
otu3312	2	2	0	0	0	0	4	0	0
otu1207	1	6	10	3	9	1	1	4	1
otu353	1	0	3	0	0	0	8	8	0
otu1951	1	10	5	1	2	0	0	2	0
otu625	1	12	15	11	7	3	3	13	3
otu3253	1	6	5	0	0	0	0	0	0
otu645	0	18	4	35	0	0	0	0	0
otu989	0	2	2	0	0	3	0	5	7
otu375	0	3	19	0	0	5	10	18	2
otu3042	0	10	2	2	0	0	1	1	0
otu51	0	1	37	0	8	1	91	128	16
otu118	0	42	12	133	0	0	1	1	0
otu643	0	2	9	0	0	1	8	11	6
otu199	0	3	14	0	0	2	59	62	0
otu2460	0	3	0	0	0	0	12	2	1
otu129	0	6	18	0	0	1	23	33	4
otu1903	0	1	2	0	0	0	3	6	0
otu2939	0	1	3	0	0	3	2	0	0
otu91	0	1	21	0	2	4	95	99	0
otu2646	0	3	6	4	0	0	12	1	0
otu647	0	1	10	0	0	0	11	15	2
otu549	0	2	6	0	0	0	7	5	0
otu209	0	2	29	0	0	3	12	29	4
otu1077	0	5	1	0	3	0	2	11	0
otu1449	0	2	13	1	0	0	15	12	0
otu2176	0	2	2	0	0	0	4	9	3
otu1215	0	3	5	0	0	1	2	9	0
otu501	0	1	8	0	0	5	39	42	1
otu336	0	3	22	0	1	2	22	23	0
otu953	0	2	16	0	4	2	12	11	0
otu34	0	2	25	0	0	5	187	132	0
otu22	0	1	39	0	0	7	227	148	1
otu1966	0	0	28	0	0	0	6	20	0
otu96	0	0	25	0	0	3	20	21	3
otu74	0	0	19	1	1	1	25	27	3
otu188	0	0	11	1	5	2	58	61	8
otu308	0	0	16	0	0	3	20	14	5
otu72	0	0	23	0	3	8	142	85	0
otu762	0	0	8	1	0	1	1	2	2
otu321	0	0	7	0	5	2	43	51	10
otu1659	0	0	4	0	0	1	4	1	0
otu2531	0	0	30	1	0	0	5	13	0
otu75	0	0	41	0	6	1	96	127	9
otu1134	0	0	11	0	0	1	22	24	7
otu577	0	0	5	0	0	0	8	14	2
otu714	0	0	7	0	3	1	21	28	7
otu1462	0	0	11	1	0	0	2	9	10
otu2883	0	0	3	0	0	0	3	3	0
otu141	0	0	14	0	11	1	74	79	5
otu1561	0	0	6	0	0	0	1	5	1
otu1233	0	0	5	0	1	1	10	5	0
otu2081	0	0	2	0	0	2	2	1	5
otu2874	0	0	1	0	0	0	4	1	1
otu712	0	0	5	0	0	0	4	3	0
otu1670	0	0	6	1	0	0	0	3	11
otu2755	0	0	3	0	0	2	9	21	8
otu2878	0	0	4	0	0	0	4	2	2
otu2753	0	0	5	0	0	0	3	5	3
otu2712	0	0	1	0	0	0	0	2	0
otu3453	0	0	1	0	2	0	6	5	38
otu1736	0	0	3	0	0	0	1	7	0
otu1860	0	0	0	3	0	0	2	1	0
otu2051	0	0	0	0	3	0	2	3	0
otu2053	0	0	0	0	0	3	2	4	3
otu383	0	0	0	0	0	0	10	9	0
otu1448	0	0	0	0	0	0	5	8	0
otu1998	0	0	0	0	0	0	3	1	0
otu193	3	4	11	0	0	7	6	11	44
otu131	1	0	8	0	0	7	4	15	44
otu26	0	10	50	0	26	34	143	173	11
otu929	0	1	2	0	0	4	3	2	21
otu2132	0	4	0	0	12	23	0	0	1
otu70	0	9	16	0	0	9	35	53	5
otu196	0	2	5	0	0	1	21	30	3
otu412	0	6	7	0	0	7	3	6	14
otu48	0	8	21	1	0	10	43	35	9
otu43	0	5	43	1	14	34	86	125	4
otu178	0	4	18	0	11	15	35	80	2
otu2255	0	3	0	0	4	13	0	0	0
otu101	0	3	25	1	5	25	61	81	5
otu727	0	2	6	0	0	2	12	12	1
otu89	0	4	29	1	9	13	55	102	0
otu279	0	2	3	0	0	7	0	3	19
otu385	0	1	7	0	0	1	11	28	8
otu490	0	4	7	0	0	2	3	8	23
otu440	0	1	3	0	0	5	1	9	28
otu179	0	2	5	0	0	0	23	20	3
otu2875	0	1	0	0	7	8	0	0	5
otu793	0	1	3	0	0	0	5	4	22
otu1725	0	1	0	0	0	7	0	1	25
otu1432	0	1	4	0	0	2	0	2	13
otu960	0	0	4	0	0	3	0	4	10
otu1638	0	0	4	0	0	0	7	23	1
otu1006	0	0	6	0	0	1	13	6	0
otu298	0	0	12	1	0	2	13	10	4
otu251	0	0	12	1	0	0	44	66	6
otu347	0	0	8	0	0	2	16	10	4
otu330	0	0	12	0	0	1	26	59	11
otu1061	0	0	4	0	0	0	14	25	2
otu334	0	0	11	0	2	10	16	29	2
otu536	0	0	3	0	0	0	21	38	1
otu583	0	0	10	0	0	1	19	6	1
otu2626	0	0	2	0	0	0	2	8	0
otu987	0	0	2	0	0	0	0	7	0
otu1857	0	0	6	0	0	1	0	3	0
otu2221	0	0	1	0	0	0	0	3	0
otu1322	0	0	4	0	0	1	9	5	0
otu880	0	0	5	1	0	0	23	29	4
otu2873	0	0	0	0	6	0	0	0	37
otu3183	0	0	0	0	0	4	0	0	9
otu1129	0	0	0	0	0	5	0	0	45
otu2526	0	0	0	0	0	1	0	1	34
otu1821	0	0	0	0	0	1	1	4	9
otu3423	0	0	0	0	0	1	0	1	15
otu2461	0	0	0	0	0	1	6	3	0
otu514	0	0	0	0	0	0	6	16	0
otu852	0	0	0	0	0	0	15	12	0
otu480	0	0	0	0	0	0	1	0	62
otu1295	0	0	0	0	0	0	0	3	0
otu1660	0	0	0	0	0	0	0	0	20
otu1216	0	0	0	0	0	0	0	0	33
otu3290	0	0	0	0	0	0	0	0	18
otu367	0	0	0	0	0	0	0	0	58
otu2595	0	0	0	0	0	0	0	0	19
otu1197	0	0	0	0	0	0	0	0	32
otu1213	0	0	0	0	0	0	0	0	0
otu2516	0	0	0	0	0	0	0	0	0
otu1119	4	14	11	0	0	0	10	14	2
otu2618	3	8	1	2	1	11	0	3	1
otu1187	3	13	6	0	0	0	2	13	0
otu1782	2	0	1	1	12	5	1	3	0
otu2477	3	18	4	0	2	17	1	0	0
otu1301	2	8	7	0	0	0	4	15	0
otu675	1	3	4	0	30	8	2	4	0
otu1776	1	3	0	0	10	6	3	4	0
otu2367	5	29	7	1	2	26	1	1	2
otu860	1	4	4	0	21	7	7	3	0
otu2238	1	8	1	0	0	0	1	5	0
otu994	1	4	4	7	18	4	6	0	0
otu3145	0	1	2	0	2	0	3	0	2
otu1678	0	4	3	0	0	0	7	3	2
otu2467	0	1	6	0	0	0	0	0	4
otu3054	0	2	0	0	8	4	2	1	1
otu1143	0	1	3	0	0	0	13	5	0
otu2273	0	0	5	0	0	0	12	5	0
otu2392	0	0	3	0	0	1	2	5	0
otu3507	0	0	1	0	0	0	4	0	1
otu2076	0	0	0	0	0	1	5	4	1
otu2881	0	0	0	0	0	0	7	1	1
otu355	14	8	0	0	94	3	0	0	0
otu280	39	52	17	11	77	20	6	6	0
otu145	35	37	24	33	65	16	9	7	0
otu288	17	20	1	0	39	96	0	3	0
otu429	20	45	18	2	0	0	0	3	0
otu80	93	117	21	25	166	53	16	10	0
otu37	92	144	62	5	73	46	53	44	0
otu45	108	158	36	8	235	103	17	12	0
otu1238	10	18	6	3	0	0	0	0	0
otu3200	10	6	2	0	3	1	0	2	0
otu144	64	43	3	0	86	40	1	3	4
otu2130	5	0	0	0	40	0	0	1	0
otu161	51	89	14	5	127	36	6	5	0
otu109	49	92	25	6	40	29	17	23	1
otu1254	15	12	4	0	0	1	5	4	0
otu1300	12	13	0	0	0	0	0	4	0
otu476	33	15	13	0	7	41	0	1	0
otu342	33	11	14	0	5	62	0	1	0
otu38	126	204	40	14	233	94	24	20	0
otu812	36	14	0	7	12	1	0	0	0
otu635	23	49	4	2	24	5	2	4	0
otu378	20	48	2	1	16	22	0	2	2
otu935	8	30	7	13	0	0	0	0	0
otu56	49	67	56	23	99	37	27	12	0
otu2747	15	12	4	1	0	1	1	2	0
otu106	72	83	15	27	146	51	5	10	0
otu1451	10	17	2	0	0	0	4	0	0
otu301	13	24	10	40	20	15	12	5	0
otu406	23	41	18	4	0	1	0	2	0
otu425	21	9	11	1	10	53	0	0	0
otu166	56	53	10	0	98	37	0	3	4
otu3176	58	0	0	0	0	0	0	0	0
otu31	41	93	56	121	32	20	138	68	4
otu39	82	125	53	4	67	42	44	64	0
otu2523	10	3	0	4	10	5	1	1	0
otu25	54	92	69	118	26	19	150	89	7
otu1709	12	23	1	1	7	0	0	1	0
otu2989	3	4	0	0	5	1	0	0	0
otu123	28	30	24	27	88	21	23	8	0
otu2147	6	5	4	8	17	5	1	2	0
otu361	23	42	15	2	15	9	10	15	1
otu593	17	13	8	0	7	40	0	0	0
otu743	19	9	2	0	0	3	6	5	0
otu1691	3	3	1	28	0	0	2	0	0
otu546	11	14	0	0	31	41	0	2	0
otu1366	8	31	3	0	0	0	0	0	0
otu774	36	13	0	7	9	2	0	0	0
otu278	24	11	0	0	107	1	0	0	0
otu1669	2	4	1	14	1	2	0	2	0
otu1963	27	31	0	0	0	0	0	0	0
otu833	38	12	0	6	14	1	0	0	0
otu1554	10	16	1	0	5	14	0	0	0
otu604	20	8	0	0	61	2	0	0	0
otu1023	32	9	0	8	7	0	0	1	0
otu1210	1	4	15	0	15	0	1	4	0
otu345	44	45	1	1	42	10	1	4	0
otu2304	26	17	1	1	0	1	0	0	0
otu835	7	14	1	0	11	31	0	0	0
otu417	26	21	2	0	39	13	0	1	4
otu2473	9	4	0	0	7	2	0	0	0
otu1260	16	38	1	0	0	0	0	0	0
otu1417	36	17	0	0	28	0	0	0	0
otu76	48	55	54	25	94	42	32	20	0
otu245	10	31	10	45	7	5	36	16	2
otu369	17	26	10	5	28	9	4	5	0
otu1962	23	13	2	5	5	1	1	2	0
otu471	14	9	0	0	58	2	0	0	0
otu224	18	21	34	3	18	19	2	8	0
otu1431	12	22	1	0	0	0	0	0	0
otu1721	2	13	6	0	0	0	0	3	0
otu97	86	84	28	8	49	21	26	30	0
otu1535	14	20	0	0	11	0	0	0	0
otu525	12	31	5	23	6	1	2	1	0
otu974	20	10	0	0	0	0	4	3	0
otu1050	9	12	9	1	12	3	0	0	0
otu1164	9	15	3	11	24	6	4	3	0
otu66	31	45	45	137	22	11	79	38	2
otu695	19	24	0	0	0	18	0	2	6
otu781	15	19	2	0	25	9	0	0	4
otu1106	9	20	10	0	0	0	0	6	0
otu628	13	30	6	0	0	0	0	5	0
otu400	17	58	11	18	5	2	0	2	0
otu174	30	57	20	1	31	13	11	20	0
otu780	4	45	11	8	1	0	0	3	0
otu2742	46	0	0	0	0	1	0	0	0
otu327	6	7	36	6	3	31	8	19	19
otu370	4	5	24	0	1	0	6	26	0
otu2664	11	9	1	0	1	2	0	0	0
otu2729	6	15	1	0	0	0	0	0	0
otu2224	4	12	4	0	0	0	0	0	0
otu2229	5	3	0	20	0	0	0	0	0
otu1740	13	22	0	1	13	0	0	1	0
otu1196	12	3	3	0	10	23	0	2	0
otu507	2	19	0	1	2	24	15	21	1
otu1927	3	8	6	0	1	3	0	2	0
otu494	6	12	3	0	30	63	0	0	0
otu527	9	23	3	0	21	70	0	0	0
otu207	40	33	3	0	62	30	0	2	3
otu2054	4	16	0	0	0	2	1	0	8
otu2602	7	16	1	0	13	0	0	0	0
otu1149	5	7	1	30	4	2	0	4	0
otu2929	9	7	0	0	0	0	0	2	0
otu665	15	22	1	0	1	18	0	0	7
otu1987	5	6	1	0	0	6	0	1	0
otu2219	5	0	19	10	0	0	0	0	0
otu3511	7	10	0	1	17	0	0	0	0
otu1971	6	14	0	0	6	6	0	2	1
otu50	41	50	37	148	25	9	92	48	2
otu535	6	4	2	37	0	0	3	0	0
otu359	15	25	10	45	35	3	6	5	0
otu257	13	27	4	0	39	95	0	2	0
otu802	8	15	20	1	16	5	5	3	0
otu840	13	32	2	1	17	8	2	3	0
otu441	17	19	18	3	22	6	3	3	0
otu1642	8	8	6	6	12	7	2	1	0
otu1246	2	0	17	3	0	0	2	4	0
otu284	32	28	5	1	59	19	0	2	6
otu563	11	51	3	14	3	1	0	2	0
otu592	4	19	3	2	0	2	9	5	0
otu550	11	9	18	13	7	8	0	1	0
otu1527	6	7	2	0	0	13	0	0	2
otu848	10	8	9	2	25	3	5	13	0
otu1558	10	8	2	0	41	0	2	0	0
otu2553	15	7	0	0	22	0	0	0	0
otu928	9	21	2	0	11	23	0	1	0
otu1181	10	22	9	7	0	1	0	0	0
otu1677	28	3	0	4	25	1	0	0	0
otu428	21	44	2	0	14	15	1	7	0
otu923	6	6	26	5	0	0	0	0	0
otu2430	17	14	1	0	3	1	2	0	0
otu797	8	6	0	0	46	0	0	0	0
otu3519	3	4	4	12	9	0	0	0	0
otu1171	6	1	0	0	18	29	0	0	0
otu1617	12	23	0	0	8	2	3	0	0
otu2740	6	7	6	9	4	0	0	0	0
otu389	21	58	2	1	36	5	2	6	0
otu1916	2	12	0	3	0	0	0	0	0
otu3052	7	14	0	1	3	0	0	0	0
otu1563	4	2	1	26	4	2	1	1	0
otu3271	6	5	0	0	1	3	0	0	0
otu1450	17	12	0	1	7	0	0	0	0
otu1739	5	5	0	10	3	1	0	1	0
otu530	8	18	0	0	24	44	0	0	0
otu130	31	47	35	27	19	4	59	31	2
otu2202	14	6	3	5	4	0	6	3	0
otu479	9	11	22	6	1	16	3	3	0
otu3072	5	2	0	0	5	5	0	0	0
otu664	14	29	0	0	7	10	0	3	0
otu2685	9	10	1	0	16	0	0	0	0
otu1832	4	7	0	0	12	15	0	0	0
otu1384	9	32	0	1	0	0	0	0	0
otu843	11	22	11	6	34	4	11	13	0
otu273	14	27	26	8	32	18	19	5	0
otu346	9	11	37	8	8	21	4	32	20
otu977	10	21	1	0	11	3	0	3	0
otu824	18	3	1	2	33	30	0	3	0
otu846	12	20	10	1	11	4	2	0	0
otu1455	10	25	2	1	0	0	0	0	0
otu1867	8	0	0	0	47	62	0	0	0
otu2337	24	21	4	0	3	2	1	4	0
otu293	15	25	13	56	26	10	11	4	0
otu596	13	43	3	0	14	13	1	2	0
otu823	2	3	0	0	22	40	0	0	0
otu2829	7	1	0	0	39	8	0	0	0
otu1459	8	20	0	0	0	0	0	0	0
otu255	19	32	14	44	19	13	9	7	0
otu263	6	21	0	0	2	41	16	45	0
otu2023	8	18	3	2	17	1	0	3	0
otu2015	2	2	6	0	6	23	0	1	1
otu2432	4	4	0	20	0	0	0	0	0
otu2437	4	9	4	0	0	0	0	0	0
otu344	16	15	21	10	34	14	1	6	0
otu2872	7	4	1	0	0	0	0	0	0
otu783	5	0	24	0	0	0	9	12	1
otu1272	8	2	0	0	12	31	0	0	0
otu3272	1	2	3	4	0	0	1	0	0
otu335	2	4	36	1	1	0	14	17	1
otu393	11	17	22	7	27	6	2	4	0
otu2358	8	4	4	0	4	14	0	0	0
otu1394	3	0	15	21	0	0	0	0	0
otu3231	4	0	5	3	0	0	0	0	0
otu3443	4	10	0	0	0	0	0	0	0
otu2450	8	7	1	2	38	3	2	2	0
otu653	10	38	4	0	1	0	0	7	0
otu776	11	27	9	4	15	10	1	3	0
otu2095	1	1	0	17	0	0	0	0	0
otu360	13	49	8	9	4	3	0	4	0
otu2659	9	7	0	22	0	0	0	0	0
otu1975	8	2	0	1	14	1	0	0	0
otu2673	7	11	0	0	0	0	0	0	0
otu3023	1	6	6	0	2	2	2	0	0
otu443	11	12	18	14	5	6	2	3	0
otu932	7	30	5	9	2	0	1	5	1
otu3382	7	9	0	0	9	0	0	0	0
otu1012	2	6	10	13	0	2	1	1	0
otu3415	4	8	0	0	40	6	0	0	0
otu1722	1	12	2	0	9	1	0	0	0
otu1978	8	12	1	0	4	2	0	0	0
otu870	3	13	3	0	31	16	2	1	2
otu3341	3	3	1	0	5	1	0	0	0
otu630	6	5	17	12	1	23	3	13	9
otu618	3	8	26	10	3	14	7	20	6
otu2744	13	1	0	0	13	0	0	0	0
otu652	4	1	10	5	1	0	16	13	2
otu324	3	12	0	1	39	75	0	0	0
otu1754	7	6	2	0	15	0	3	1	0
otu2527	1	5	6	7	5	0	4	0	0
otu1401	2	9	0	0	16	10	3	0	3
otu723	3	7	14	0	0	0	9	13	0
otu644	5	10	4	0	20	20	1	0	7
otu1467	13	4	0	1	6	4	0	0	0
otu1768	7	9	2	10	25	11	0	0	0
otu2167	4	4	0	0	13	17	0	0	0
otu3080	2	8	2	0	0	0	2	2	0
otu1836	6	14	2	10	1	0	0	1	0
otu1496	5	25	3	4	5	1	0	0	0
otu544	24	38	3	1	29	5	0	6	0
otu1192	5	21	1	1	5	7	1	1	0
otu2194	4	10	1	0	0	0	2	2	0
otu1325	3	7	4	16	20	3	7	8	0
otu588	4	4	26	11	0	0	0	0	0
otu2621	3	14	4	0	0	0	0	0	0
otu606	4	12	1	0	18	46	0	0	0
otu2536	1	1	0	25	0	0	0	0	0
otu2356	4	11	0	37	0	0	0	0	0
otu1672	1	0	7	10	0	0	1	1	0
otu1438	7	2	1	1	14	16	1	2	0
otu2000	2	5	0	0	8	21	0	0	1
otu192	10	32	0	0	5	50	15	39	0
otu1014	1	0	20	3	0	0	1	5	0
otu557	1	0	18	29	6	7	8	1	0
otu2442	3	4	0	9	2	7	2	2	0
otu419	3	27	0	0	4	14	11	28	0
otu1503	2	3	8	4	2	10	3	6	2
otu1480	2	6	7	7	11	1	3	7	0
otu993	9	3	13	1	0	0	0	0	0
otu1772	10	8	2	1	6	1	0	1	0
otu842	3	1	11	6	2	1	20	8	0
otu2601	1	0	3	0	0	0	0	1	15
otu2322	3	3	0	0	21	0	0	0	0
otu60	10	26	63	1	11	1	96	57	0
otu733	2	6	6	0	1	0	13	27	35
otu729	7	24	5	6	3	1	0	2	0
otu1218	3	22	7	20	2	0	1	2	0
otu2841	1	2	3	5	0	0	0	0	0
otu2343	3	7	1	4	0	0	0	0	0
otu1443	1	1	10	6	0	0	0	0	0
otu1088	1	0	14	8	7	3	1	0	0
otu1292	2	10	0	25	1	6	0	2	0
otu2196	1	1	9	0	0	0	2	6	0
otu2260	4	6	3	6	2	5	0	0	0
otu2826	1	14	3	5	1	0	0	1	0
otu260	3	3	13	0	4	0	27	15	44
otu1809	1	6	1	0	20	5	3	0	2
otu2139	1	12	0	0	5	7	0	0	0
otu3104	5	15	0	1	5	0	0	0	0
otu636	1	4	14	0	2	0	23	16	0
otu3226	1	12	4	0	0	0	0	0	0
otu1839	3	14	6	4	0	0	0	1	0
otu2739	1	10	0	0	27	2	0	0	0
otu2911	3	4	1	1	5	2	1	0	0
otu1296	5	7	3	1	0	3	8	3	0
otu2075	2	0	2	0	3	16	0	1	0
otu2857	2	7	0	0	0	2	4	0	0
otu1805	1	1	2	1	14	16	0	1	0
otu934	1	21	4	0	10	7	2	4	11
otu1991	1	7	2	1	15	4	2	2	2
otu2530	1	4	8	7	0	0	0	0	0
otu2109	3	0	13	0	0	0	0	9	0
otu124	1	3	17	0	7	3	46	41	68
otu1351	1	9	2	1	20	9	1	1	6
otu905	1	21	11	2	1	0	21	7	0
otu2798	1	0	2	3	1	0	4	4	0
otu116	1	3	24	0	3	3	49	54	82
otu2177	1	3	5	3	11	0	3	4	0
otu2333	2	2	7	2	0	0	1	0	0
otu487	1	0	32	16	21	7	1	0	0
otu3289	2	1	0	0	23	1	0	0	0
otu1418	1	6	6	0	0	1	9	5	0
otu1044	1	0	1	45	0	0	0	0	0
otu1989	1	1	2	22	0	0	0	0	0
otu634	1	20	10	0	0	1	12	5	0
otu2257	0	1	0	0	0	0	10	7	0
otu982	0	4	0	0	0	0	10	12	1
otu3372	0	3	0	0	9	0	0	0	0
otu1372	0	15	4	0	11	1	0	1	0
otu1983	0	42	0	0	0	0	4	4	0
otu223	0	3	28	0	0	0	36	31	52
otu1816	0	7	0	0	27	1	0	0	0
otu801	0	11	0	0	0	11	8	21	0
otu1753	0	5	0	0	0	4	3	13	1
otu1959	0	21	0	0	0	0	0	0	0
otu2804	0	27	0	0	0	0	1	3	0
otu2490	0	1	6	16	0	0	1	5	0
otu2674	0	7	3	0	0	1	3	3	0
otu351	0	13	13	0	1	0	24	9	0
otu3208	0	8	0	0	0	0	0	0	0
otu1392	0	4	9	0	5	1	2	4	0
otu754	0	5	1	0	30	34	0	3	0
otu2978	0	19	3	1	23	2	0	0	0
otu404	0	1	3	84	0	0	2	0	0
otu1335	0	8	7	1	5	5	0	5	6
otu1370	0	5	17	3	1	8	0	7	4
otu2182	0	2	2	0	5	12	0	0	0
otu1647	0	5	5	15	0	0	1	0	0
otu1293	0	3	0	0	22	18	0	3	0
otu3400	0	1	0	5	0	0	0	0	0
otu1017	0	4	10	24	1	0	0	3	0
otu3027	0	3	5	2	8	0	1	1	0
otu1001	0	3	12	0	2	0	13	20	16
otu2099	0	3	0	17	0	0	2	0	0
otu1374	0	3	3	0	13	13	0	0	0
otu586	0	2	1	1	26	42	0	0	0
otu1759	0	2	5	29	0	0	0	0	0
otu3334	0	1	0	1	4	9	0	1	0
otu1362	0	2	1	0	19	28	0	0	0
otu204	0	2	40	3	0	0	58	45	0
otu2848	0	3	0	0	0	0	3	5	0
otu1083	0	1	17	0	0	0	3	13	0
otu114	0	1	52	0	0	0	82	49	0
otu1145	0	1	0	0	0	0	11	10	0
otu2909	0	0	14	0	0	0	0	0	0
otu287	0	0	48	5	0	0	6	19	0
otu392	0	0	25	2	0	0	2	15	0
otu1716	0	0	8	0	0	0	4	3	0
otu306	0	0	29	0	0	0	33	30	0
otu241	0	0	38	35	16	8	4	0	0
otu1175	0	0	14	0	0	0	5	3	1
otu1024	0	0	14	4	0	0	11	7	0
otu498	0	0	18	16	9	3	1	0	0
otu1938	0	0	3	0	3	16	0	2	3
otu219	0	0	30	0	0	0	45	29	0
otu3110	0	0	12	0	1	0	1	2	0
otu98	0	0	2	0	0	0	2	3	233
otu1201	0	0	14	0	0	0	2	2	1
otu3040	0	0	2	8	0	0	0	3	0
otu2030	0	0	5	9	0	0	0	0	0
otu2676	0	0	1	0	2	13	0	0	0
otu276	0	0	3	0	0	0	1	1	141
otu2123	0	0	4	4	0	0	4	8	0
otu2415	0	0	2	26	0	0	0	0	0
otu1794	0	0	2	49	0	0	0	0	0
otu2760	0	0	1	0	10	6	0	0	0
otu1848	0	0	9	1	0	0	2	2	0
otu2566	0	0	1	0	0	0	0	1	37
otu210	0	0	1	0	0	0	0	4	154
otu2344	0	0	1	17	0	0	0	0	0
otu1243	0	0	0	44	0	0	0	0	0
otu1139	0	0	0	29	0	0	1	0	0
otu1283	0	0	0	24	0	0	0	1	0
otu1783	0	0	0	26	0	0	0	0	0
otu1082	0	0	0	21	0	0	0	0	0
otu1070	0	0	0	45	0	0	0	0	0
otu1500	0	0	0	1	0	0	15	4	0
otu2599	0	0	0	17	0	0	0	0	0
otu2098	0	0	0	15	0	0	0	0	0
otu2648	0	0	0	17	0	0	0	0	0
otu3459	0	0	0	3	0	0	0	0	0
otu1889	0	0	0	0	17	13	0	0	3
otu2718	0	0	0	0	35	0	0	0	0
otu3389	0	0	0	0	18	0	0	0	0
otu3010	0	0	0	0	4	13	0	0	0
otu2677	0	0	0	0	5	13	0	0	0
otu2183	0	0	0	0	6	14	0	0	0
otu2189	0	0	0	0	10	8	0	1	0
otu2918	0	0	0	0	34	4	0	0	0
otu1327	0	0	0	0	13	26	0	0	0
otu2545	0	0	0	0	9	13	0	0	2
otu1645	0	0	0	0	7	24	0	0	0
otu2950	0	0	0	0	5	6	0	0	0
otu1412	0	0	0	0	3	21	0	0	0
otu2961	0	0	0	0	0	0	12	4	0
otu704	0	0	0	0	0	0	1	2	66
otu3456	0	0	0	0	0	0	8	3	0
otu289	0	0	0	0	0	0	1	2	119
otu93	0	0	0	0	0	0	2	3	246
otu2513	0	0	0	0	0	0	0	0	22
otu1650	0	0	0	0	0	0	0	0	25
otu2819	0	0	0	0	0	0	0	0	78
otu3001	6	9	3	0	0	0	0	2	0
otu1140	2	4	1	1	0	0	1	10	0
otu968	0	0	3	0	0	0	3	12	0
otu873	4	12	0	0	6	34	0	2	0
otu169	10	3	13	0	2	3	47	46	0
otu855	6	9	0	0	2	36	0	4	0
otu553	2	1	3	0	0	1	24	25	0
otu1043	1	0	6	0	0	0	13	8	0
otu1195	4	8	0	0	0	16	1	0	1
otu249	1	0	14	0	0	1	44	31	0
otu2983	2	1	0	0	1	14	0	0	0
otu3295	2	3	1	0	0	9	0	1	0
otu2793	3	7	0	0	0	10	0	0	0
otu2159	6	8	6	0	0	3	1	5	0
otu1734	1	0	2	0	0	13	4	10	1
otu2181	5	3	1	0	2	5	0	1	0
otu2827	1	4	2	0	0	15	0	0	0
otu1654	2	5	0	0	2	25	0	1	0
otu1569	1	3	4	0	5	1	11	10	0
otu1976	1	12	1	0	0	20	3	2	0
otu1158	1	5	30	5	0	0	0	4	0
otu432	2	14	44	6	0	4	2	1	0
otu541	2	5	58	2	0	4	2	5	0
otu2737	0	4	3	0	0	8	3	0	0
otu2007	0	6	29	0	0	0	2	3	0
otu3051	0	5	6	0	0	0	0	4	0
otu1073	0	12	6	0	0	29	0	3	0
otu788	0	1	9	0	0	5	5	5	0
otu3192	0	4	2	0	0	0	0	2	0
otu861	0	2	36	8	0	7	1	1	0
otu2564	0	2	7	0	0	0	4	4	0
otu2102	0	1	7	0	0	1	4	4	0
otu2554	0	2	11	3	0	2	1	2	0
otu1101	0	2	7	1	0	1	5	10	0
otu1637	0	0	2	0	0	12	6	4	3
otu949	0	0	5	0	0	0	19	18	1
otu3134	0	0	0	0	0	7	2	1	1
otu699	0	0	0	0	0	0	19	4	0
otu1808	0	0	0	0	0	0	18	1	0
otu1521	0	0	0	0	0	0	17	0	0
otu2663	0	0	0	0	0	0	11	0	0
otu2942	0	0	0	0	0	0	5	2	0
otu1571	4	12	6	1	4	0	10	3	0
otu706	4	23	11	0	0	7	1	12	0
otu2579	38	5	0	0	3	0	0	0	0
otu1658	5	2	0	0	33	13	0	0	0
otu2497	4	7	6	1	7	0	4	4	0
otu1282	9	12	20	0	4	0	6	2	0
otu3091	19	5	0	0	0	0	0	0	0
otu952	18	5	1	32	13	0	0	0	0
otu337	6	7	7	1	68	19	2	5	0
otu581	35	6	0	7	18	0	0	0	0
otu772	18	3	3	31	9	0	0	0	0
otu1025	27	10	0	11	16	0	0	0	0
otu1682	14	6	3	0	35	15	0	2	0
otu2093	36	12	0	0	3	0	0	0	0
otu906	7	2	19	0	8	0	9	10	0
otu2374	7	0	0	0	6	20	0	2	0
otu1996	9	1	0	6	7	0	0	0	0
otu1220	13	11	2	41	13	0	0	1	0
otu512	1	2	12	0	0	1	8	11	22
otu617	22	12	1	30	15	0	0	0	0
otu1132	6	8	14	1	11	0	6	5	0
otu2270	8	4	1	10	1	0	0	0	0
otu2620	9	12	0	0	3	0	0	0	0
otu2772	5	5	0	0	3	0	0	0	0
otu1874	9	1	3	6	9	0	0	0	0
otu2667	1	3	0	0	18	2	0	1	0
otu290	5	4	0	0	50	25	0	6	0
otu1379	6	5	0	20	13	0	0	0	0
otu3140	4	6	0	0	5	0	0	0	0
otu1406	11	0	2	0	55	21	0	0	0
otu1109	6	7	11	0	2	0	14	3	0
otu897	8	4	0	33	11	0	0	0	0
otu455	3	5	2	1	64	10	3	13	0
otu3513	10	0	0	2	4	8	0	0	0
otu1430	1	17	9	1	0	0	1	3	0
otu1223	4	21	14	0	5	5	2	7	0
otu2222	2	4	0	17	4	0	0	0	0
otu730	4	4	8	1	0	0	4	3	20
otu2413	2	4	1	0	14	1	0	2	0
otu608	4	25	10	0	2	17	1	5	0
otu1180	3	4	2	0	31	8	2	4	0
otu3086	4	6	6	0	5	0	2	1	0
otu2558	3	3	7	0	1	3	3	3	0
otu2727	2	5	0	2	2	15	0	3	0
otu2187	1	1	5	0	0	0	1	6	7
otu2907	0	4	0	0	6	10	0	0	0
otu2837	0	11	0	1	0	0	0	0	0
otu1553	0	1	4	0	0	0	5	7	19
otu2999	0	12	0	0	0	0	0	0	0
otu978	0	1	2	1	51	15	0	1	0
otu508	0	3	13	0	0	0	32	10	0
otu3502	0	1	1	0	0	1	3	2	19
otu3548	0	1	0	0	14	0	0	0	0
otu2651	0	0	3	1	15	0	0	3	0
otu2900	0	0	2	11	3	0	0	0	0
otu2043	0	0	0	24	0	0	0	0	0
otu1441	22	3	0	22	1	1	0	0	0
otu2140	7	14	0	1	0	0	0	2	0
otu1330	4	7	2	21	2	0	0	0	0
otu36	174	169	58	86	47	2	8	17	0
otu62	149	145	46	75	45	2	3	12	0
otu63	99	121	32	109	18	0	1	11	0
otu341	47	43	5	3	4	0	0	0	0
otu1745	3	4	12	3	0	0	1	3	0
otu2575	4	1	0	1	23	0	0	0	0
otu310	46	51	8	17	6	0	2	5	0
otu28	49	105	174	14	33	27	104	58	3
otu33	36	121	201	16	39	30	88	60	1
otu187	63	81	18	24	15	0	3	5	0
otu299	13	34	50	1	12	5	22	20	1
otu1278	22	12	0	0	0	0	0	2	0
otu447	28	7	1	63	4	0	0	0	0
otu388	34	14	1	64	2	0	0	0	1
otu103	82	102	21	100	23	3	1	19	0
otu2936	5	3	0	11	6	0	0	0	0
otu1599	45	13	1	0	19	0	0	1	0
otu816	15	28	0	0	0	0	0	1	0
otu3112	17	8	1	0	12	0	1	1	0
otu1369	10	7	0	0	42	0	0	0	0
otu381	31	29	2	31	12	0	0	0	0
otu650	47	22	1	0	0	0	0	3	0
otu1795	6	12	9	4	8	12	6	1	1
otu1329	18	20	4	1	2	0	0	0	0
otu1323	24	17	1	0	0	0	0	1	0
otu757	4	3	8	42	6	0	0	0	0
otu1517	10	0	5	0	7	10	0	0	0
otu611	31	24	2	0	2	0	0	0	0
otu1828	15	12	0	0	0	0	0	4	0
otu948	11	32	0	0	0	0	0	4	0
otu1891	8	11	0	0	0	0	0	3	0
otu468	25	16	4	23	10	0	0	1	0
otu524	38	13	0	42	4	1	0	0	0
otu2771	5	1	3	0	1	7	0	0	0
otu2787	19	8	0	0	18	0	0	0	0
otu2487	1	9	3	0	22	9	0	0	0
otu505	25	20	0	42	1	3	0	0	0
otu82	27	69	104	14	24	13	54	34	1
otu2175	7	20	0	0	0	0	0	0	0
otu3149	18	12	0	2	21	1	0	0	0
otu954	3	6	8	0	1	0	1	6	0
otu354	6	9	1	91	1	1	6	2	0
otu2836	9	3	1	0	31	1	0	0	0
otu1452	18	15	3	0	1	0	0	0	0
otu3274	4	0	0	15	0	0	0	0	0
otu894	26	18	3	1	0	0	0	3	0
otu3243	4	6	0	3	0	0	0	0	0
otu2585	26	26	2	5	49	3	0	0	0
otu2395	3	1	0	13	0	0	3	0	0
otu657	8	2	4	48	0	1	1	0	0
otu2976	12	10	3	3	10	1	0	0	0
otu268	14	9	4	68	3	0	3	2	0
otu1422	18	3	7	0	3	15	0	0	0
otu421	25	22	2	33	8	0	0	0	0
otu528	19	20	2	33	6	0	0	0	0
otu3304	1	0	0	0	9	0	0	0	0
otu565	6	5	14	0	1	0	0	7	1
otu493	52	31	2	0	0	0	0	3	0
otu2129	10	8	0	21	4	0	0	0	0
otu2233	3	1	2	19	6	2	2	1	0
otu221	11	13	52	5	0	0	17	15	0
otu1735	33	30	4	5	48	3	0	0	0
otu1510	17	22	0	1	46	1	0	0	0
otu140	18	54	78	7	10	13	43	27	0
otu1631	16	14	0	10	5	0	1	0	0
otu2637	1	2	4	1	20	3	2	5	3
otu3092	4	14	0	0	0	0	0	1	0
otu1338	12	18	2	0	4	0	0	0	0
otu3296	10	13	2	19	18	1	0	0	0
otu2984	1	5	0	0	18	12	0	1	0
otu3273	5	0	0	12	0	0	0	0	0
otu2295	5	0	0	8	0	0	0	0	0
otu883	7	9	2	34	1	1	2	0	0
otu348	6	1	2	92	4	1	2	4	0
otu2086	2	3	14	0	1	1	1	4	0
otu2161	12	3	2	0	29	14	0	1	0
otu291	10	15	27	4	0	0	9	13	0
otu599	2	2	2	66	0	0	0	0	0
otu1103	5	4	13	0	1	12	0	4	0
otu78	28	82	83	21	15	13	67	26	0
otu2894	5	0	1	47	0	0	0	0	0
otu1793	10	8	1	8	2	0	0	0	0
otu904	1	0	0	21	0	0	0	0	0
otu782	3	7	23	1	0	0	8	8	0
otu3161	2	6	3	0	12	4	0	2	0
otu2163	4	8	4	0	6	7	2	4	0
otu1781	1	2	4	25	4	0	0	0	0
otu2438	2	2	0	0	13	0	0	0	0
otu863	3	3	6	70	7	0	0	0	0
otu1570	1	6	18	0	2	6	4	7	1
otu1339	3	0	0	46	0	0	0	0	0
otu3446	2	13	0	0	0	0	0	1	0
otu3449	1	3	6	0	0	2	3	7	5
otu841	5	6	6	49	9	1	0	0	0
otu912	6	8	16	3	0	0	6	4	0
otu1779	1	0	1	42	0	0	0	0	0
otu467	1	13	18	3	0	0	10	9	0
otu332	7	18	8	59	8	0	6	1	0
otu3495	4	1	4	0	7	0	2	9	1
otu1355	1	0	0	20	0	0	0	0	0
otu1027	1	5	1	29	0	0	0	0	0
otu1037	1	3	10	5	0	1	7	5	0
otu2373	3	6	2	0	3	0	0	5	0
otu988	2	0	0	23	0	0	0	0	0
otu1420	2	0	2	47	0	0	0	0	0
otu944	1	0	7	58	0	1	3	2	0
otu1206	1	2	19	31	0	0	1	9	0
otu600	2	8	19	1	0	0	8	11	0
otu2870	3	10	0	0	1	0	0	0	0
otu2638	1	1	0	19	0	0	2	0	0
otu1365	2	10	9	0	0	0	2	8	0
otu2696	1	2	1	10	0	0	0	0	0
otu3373	2	0	0	15	0	0	0	0	0
otu518	1	5	16	2	1	3	12	6	0
otu1489	1	0	0	21	0	0	0	0	0
otu2594	0	3	1	0	23	12	0	0	0
otu2476	0	3	8	1	1	0	7	2	0
otu1692	0	1	1	31	0	0	0	0	0
otu1577	0	7	8	0	12	7	4	4	7
otu899	0	6	4	57	4	0	0	0	0
otu1124	0	4	11	6	0	1	10	2	0
otu3383	0	5	4	0	0	2	1	13	5
otu1062	0	4	8	0	0	6	4	11	5
otu1465	0	1	3	26	0	0	0	0	0
otu850	0	1	4	64	1	1	1	3	0
otu1004	0	1	0	42	0	0	0	0	0
otu810	0	8	5	0	0	7	3	30	6
otu1591	0	1	1	61	0	0	0	0	0
otu668	0	3	0	63	0	0	0	0	0
otu2713	0	2	2	16	0	0	2	1	0
otu609	0	1	0	55	0	0	0	0	0
otu3257	0	3	0	5	0	0	0	0	0
otu3464	0	2	5	6	0	0	1	1	0
otu1525	0	2	12	41	0	0	3	3	0
otu3545	0	3	1	0	1	0	5	1	0
otu979	0	0	1	46	0	0	0	0	0
otu1548	0	0	3	30	0	0	0	2	0
otu2047	0	0	7	44	0	0	0	0	0
otu2362	0	0	1	17	0	0	0	0	0
otu2216	0	0	8	0	0	0	1	1	0
otu940	0	0	11	58	0	0	4	4	0
otu2256	0	0	1	19	0	0	0	0	0
otu1086	0	0	3	34	0	0	0	0	0
otu3426	0	0	2	9	0	0	0	0	0
otu3255	0	0	1	12	0	0	0	0	0
otu3413	0	0	3	0	0	0	3	0	0
otu2089	0	0	3	37	0	0	0	0	0
otu830	0	0	2	0	1	4	5	14	0
otu2372	0	0	2	15	0	0	0	0	0
otu2002	0	0	1	23	0	0	0	0	0
otu1683	0	0	1	17	0	0	0	0	0
otu3327	0	0	1	12	0	0	0	2	0
otu1390	0	0	1	30	0	0	0	0	0
otu2736	0	0	1	0	2	2	1	12	0
otu701	0	0	3	75	0	0	0	1	0
otu951	0	0	1	1	4	8	3	9	0
otu1318	0	0	0	47	1	0	0	0	0
otu1476	0	0	0	27	0	0	0	0	0
otu1817	0	0	0	19	0	0	0	0	0
otu720	0	0	0	44	0	0	0	0	0
otu1152	0	0	0	39	0	0	0	0	0
otu1174	0	0	0	31	0	0	0	0	0
otu3048	0	0	0	8	0	0	0	0	0
otu2720	0	0	0	15	0	0	0	0	0
otu2501	0	0	0	16	0	0	0	0	0
otu1209	0	0	0	18	0	0	0	0	0
otu1748	0	0	0	35	0	0	0	0	0
otu1688	0	0	0	21	0	0	0	0	0
otu3364	0	0	0	10	0	0	0	0	0
otu806	0	0	0	36	0	0	0	0	0
otu2048	0	0	0	24	0	0	0	0	0
otu2303	0	0	0	17	0	0	0	0	0
otu2101	0	0	0	21	0	0	0	0	0
otu1414	0	0	0	47	0	0	0	0	0
otu2064	0	0	0	16	0	0	0	0	0
otu3529	0	0	0	11	0	0	0	0	0
otu939	0	0	0	46	0	0	0	0	0
otu1434	0	0	0	20	0	0	0	0	0
otu3263	0	0	0	11	0	0	0	0	0
otu537	0	0	0	65	0	0	0	0	0
otu2627	0	0	0	14	0	0	0	0	0
otu1573	0	0	0	19	0	0	0	0	0
otu1003	0	0	0	29	0	0	0	0	0
otu2316	0	0	0	20	0	0	0	0	0
otu1818	0	0	0	19	0	0	0	0	0
otu1000	0	0	0	39	0	0	0	0	0
otu2479	0	0	0	17	0	0	0	0	0
otu1905	0	0	0	16	0	0	0	0	0
otu3070	0	0	0	9	0	0	0	0	0
otu3174	0	0	0	6	0	0	0	0	0
otu3401	0	0	0	10	0	0	0	0	0
otu2952	0	0	0	9	0	0	0	0	0
otu3510	0	0	0	7	0	0	1	0	0
otu1671	0	0	0	15	0	0	0	0	0
otu1847	0	0	0	0	44	3	0	0	0
otu2433	0	0	0	0	17	1	0	0	0
otu3297	0	0	0	0	1	0	0	6	0
otu3344	0	0	0	0	0	6	0	0	33
otu2706	0	0	0	0	0	2	2	7	0
otu3109	0	0	0	0	0	0	8	10	0
otu2591	5	7	1	0	1	0	0	3	0
otu1227	5	24	1	0	6	9	1	0	0
otu2228	4	4	2	0	16	6	2	3	0
otu1597	2	13	5	0	0	2	1	5	0
otu502	3	13	5	0	15	10	8	4	19
otu2126	5	9	4	0	0	0	1	5	0
otu1624	3	14	1	0	1	5	0	0	0
otu2488	1	13	1	0	2	9	0	0	0
otu2287	3	5	5	0	0	3	0	2	0
otu1485	3	12	4	0	0	2	3	7	3
otu231	5	29	6	0	28	19	5	6	17
otu220	0	28	7	0	25	23	4	9	31
otu3392	0	10	0	0	2	3	0	0	0
otu430	0	17	3	0	21	9	8	1	19
otu1873	0	4	5	1	14	3	2	5	0
otu777	0	3	31	0	0	0	5	14	0
otu670	0	4	26	0	0	0	1	12	1
otu2377	0	4	3	1	9	1	2	4	0
otu1829	0	1	14	0	0	0	0	6	1
otu1568	0	2	11	0	0	0	3	8	1
otu2336	0	1	2	0	0	0	12	7	0
otu3258	0	2	3	0	7	0	3	4	0
otu1445	0	0	10	1	0	0	4	1	0
otu2537	0	0	9	0	0	0	1	2	0
otu2958	0	0	3	0	0	0	6	1	0
otu2896	0	0	7	0	0	0	2	0	0
otu3315	0	0	0	0	13	0	0	0	0
otu313	21	49	5	0	33	24	1	2	0
otu1469	5	4	3	0	1	5	9	11	0
otu789	13	25	4	0	13	13	3	1	0
otu3466	12	26	5	6	0	0	0	11	0
otu394	16	32	7	0	48	11	0	2	0
otu356	11	53	6	0	38	28	2	0	0
otu991	5	7	10	4	0	1	17	7	0
otu1264	6	18	1	2	3	25	0	1	0
otu1711	3	3	10	3	0	0	7	4	0
otu3045	4	7	0	0	0	17	0	1	0
otu624	4	8	20	3	0	1	18	14	0
otu1601	6	17	0	0	9	12	0	1	0
otu654	8	31	7	0	32	21	0	1	0
otu917	5	18	1	0	7	27	0	0	0
otu2469	5	8	0	0	1	15	0	0	0
otu3267	4	5	2	0	0	13	0	2	0
otu682	2	0	7	0	2	4	12	16	0
otu1250	7	2	8	0	0	1	10	6	0
otu1714	3	8	0	1	3	7	0	0	0
otu642	6	6	15	1	0	1	12	10	0
otu677	5	24	0	0	2	39	0	0	0
otu2279	0	8	0	1	2	22	0	2	0
otu3063	0	7	0	0	34	2	1	1	0
otu2806	0	0	2	0	3	4	0	0	0
otu457	0	0	7	0	0	2	17	22	0
otu1359	0	0	3	0	0	3	9	7	0
otu3212	0	0	0	0	0	0	4	6	0
otu1464	12	17	0	0	2	1	0	0	0
otu2016	13	12	1	0	2	2	0	0	0
otu2369	0	0	0	0	0	0	0	0	0
otu2803	3	5	0	0	45	18	0	0	0
