# Supplementary material for: Primary Production in the Water Column as Major Structuring Element of the Biogeographical Distribution and Function of Archaea in Deep-Sea Sediments of the Central Pacific Ocean
Source: Archaea. 2019 Mar 3;2019:3717239. doi: 10.1155/2019/3717239 (PMC6421829; doi:10.1155/2019/3717239)
Supplement: Supplementary 2 — Table S1: sampling site characteristics and alpha diversity values. [file 3717239.f2.xlsx]

## Sheet: env_table
Table S1 Sampling site characteristcs and alpha diversity values. Coverage was estimated by Michaelis-Menten kinetics.
	Envrionmental properties												Alpha diversity (calcaulated at 9058 and 4941 sequences for entire and active community, respectively)
													Entire community				Active community
Station	Ammonium	Chlorophyll (mg/ml)	Water depth (mbsl)	Fe2O3 (%)	Latitude	Longitude	MnO2 (%)	Nitrate (µM)	Phosphate (µM)	Silicic acid (µM)	Sulphur (%)	TOC (%)	Richness	Diversity	Phylogentic diversity	Coverage	Richness	Diversity	Phylogentic diversity	Coverage
2	0	41.94	4185.2	7.15	-27	178.233	1.228	32.491	0	120.473	0.262	0.261	790	5.97048	523.926	0.88951	NA	NA	NA	NA
4	0	87.77	4130	1.88	-10.3333	-176.483	0.291	32.559	0	128.28	0	0.605	887.23	6.078	509.64	0.870086	NA	NA	NA	NA
6	0	102.1	5285	5.52	-0.033333	-179.983	0.598	31.365	0	84.842	0.396	0.627	938.54	5.88475	492.045	0.844273	684.08	5.49724	525.215	0.782318
8	0	66.48	5402.2	6.72	10.9667	179	0.417	21.935	0	124.669	0.236	0	607.43	5.70069	483.263	0.927348	572	5.65668	476.234	0.849601
10	0	48.75	3257.6	1.4	21.9667	178.317	0.081	18.481	0	157.112	0	0.654	724.29	5.86521	365.929	0.897999	NA	NA	NA	NA
12	0	52.33	3486.4	1.31	33.9667	177.35	0.299	25.614	0	152.543	0	0.641	749.47	5.66847	445.252	0.881755	NA	NA	NA	NA
14	0	122.86	5909.4	5.89	45	178.75	0.657	34.643	0	318.888	0.212	0	741.59	5.49359	463.244	0.85981	545.76	5.11311	445.11	0.800738
16	0	120.5	5621.2	5.18	50	179.55	0.34	35.657	2.688	326.998	0.226	0.736	856.52	5.6996	465.896	0.842274	659.81	5.51128	500.646	0.792588
19	13.467	119.28	3299.8	3.29	58.9167	-178.933	0.254	30.536	3.011	337.969	0.28	1.249	496.75	5.06403	389.15	0.918613	431.76	5.11124	401.922	0.871807
