# Supplementary material for: Primary Production in the Water Column as Major Structuring Element of the Biogeographical Distribution and Function of Archaea in Deep-Sea Sediments of the Central Pacific Ocean
Source: Archaea. 2019 Mar 3;2019:3717239. doi: 10.1155/2019/3717239 (PMC6421829; doi:10.1155/2019/3717239)
Supplement: Supplementary 3 — Table S2: sequence characteristics and accession numbers. [file 3717239.f3.xlsx]

## Sheet: SeqStats
Table S2 Sequnce characteristics and accession numbers.
Station	Target	Bioproject accession	Biosample accession	SRA Study accession	SRA Run accession	Raw data		After processing	After denoising and chimera removal	After removal of non-archaeal sequences
2	16S rRNA gene	PRJNA479333	SAMN07268532	SRP151826	SRR7465748	(2x)	20240	13108	10929	9058
4	16S rRNA gene	PRJNA479333	SAMN07268533	SRP151826	SRR7465749	(2x)	23694	18697	16798	15252
6	16S rRNA gene	PRJNA479333	SAMN07268534	SRP151826	SRR7465750	(2x)	53582	24330	16978	14534
8	16S rRNA gene	PRJNA479333	SAMN07268535	SRP151826	SRR7465751	(2x)	53739	21330	12733	10734
10	16S rRNA gene	PRJNA479333	SAMN07268536	SRP151826	SRR7465752	(2x)	28028	18243	15629	12137
12	16S rRNA gene	PRJNA479333	SAMN07268537	SRP151826	SRR7465753	(2x)	30291	17211	12743	10414
14	16S rRNA gene	PRJNA479333	SAMN07268538	SRP151826	SRR7465754	(2x)	60299	28727	18159	14081
16	16S rRNA gene	PRJNA479333	SAMN07268539	SRP151826	SRR7465755	(2x)	57070	25705	17484	15348
19	16S rRNA gene	PRJNA479333	SAMN07268540	SRP151826	SRR7465746	(2x)	60916	27907	18766	16061
2	16S rRNA transcript	PRJNA479333	SAMN07268532	SRP151826	SRR7465756	(2x)	35593	13880	11285	50
4	16S rRNA transcript	PRJNA479333	SAMN07268533	SRP151826	SRR7465757	(2x)	42012	20093	17086	290
6	16S rRNA transcript	PRJNA479333	SAMN07268534	SRP151826	SRR7465739	(2x)	42797	31753	24193	8941
8	16S rRNA transcript	PRJNA479333	SAMN07268535	SRP151826	SRR7465738	(2x)	36949	25355	19716	4941
10	16S rRNA transcript	PRJNA479333	SAMN07268536	SRP151826	SRR7465741	(2x)	33762	17848	14533	108
12	16S rRNA transcript	PRJNA479333	SAMN07268537	SRP151826	SRR7465740	(2x)	42643	20714	17271	262
14	16S rRNA transcript	PRJNA479333	SAMN07268538	SRP151826	SRR7465743	(2x)	70081	52517	40841	14658
16	16S rRNA transcript	PRJNA479333	SAMN07268539	SRP151826	SRR7465742	(2x)	70430	59447	44602	18069
19	16S rRNA transcript	PRJNA479333	SAMN07268540	SRP151826	SRR7465745	(2x)	51218	45079	19902	8643
