# Supplementary material for: Primary Production in the Water Column as Major Structuring Element of the Biogeographical Distribution and Function of Archaea in Deep-Sea Sediments of the Central Pacific Ocean
Source: Archaea. 2019 Mar 3;2019:3717239. doi: 10.1155/2019/3717239 (PMC6421829; doi:10.1155/2019/3717239)
Supplement: Supplementary 4 — Table S3: OTU table. [file 3717239.f4.xlsx]

## Sheet: AllSamples_otu_table_tax1
Table S3 OTU table.
zOTU ID	Entire community									Active community									SILVA taxonomy	SILVA accession of best hit	Identity	Evalue
	St02	St04	St06	St08	St10	St12	St14	St16	St19	St02	St04	St06	St08	St10	St12	St14	St16	St19
UNI1633	0	0	2	0	0	3	0	1	0	0	0	5	0	0	0	12	26	1	Archaea;Asgardaeota;Heimdallarchaeia;uncultured_archaeon	FJ640804.1.935	86.874	4.04e-130
UNI1947	0	0	0	1	0	1	0	0	0	0	0	5	0	0	0	9	17	3	Archaea;Asgardaeota;Heimdallarchaeia;uncultured_archaeon	FJ640804.1.935	86.874	4.04e-130
UNI1081	0	0	0	1	0	0	1	0	0	0	0	5	0	0	0	15	36	0	Archaea;Asgardaeota;Heimdallarchaeia;uncultured_archaeon	FJ640804.1.935	86.635	1.88e-128
UNI1446	0	0	0	3	0	0	2	0	0	0	0	1	0	0	0	13	24	0	Archaea;Asgardaeota;Heimdallarchaeia;uncultured_archaeon	FJ640804.1.935	86.635	1.88e-128
UNI2393	0	0	0	0	0	0	0	0	0	0	0	6	22	0	0	2	20	1	Archaea;Asgardaeota;Heimdallarchaeia;uncultured_archaeon	FJ640804.1.935	87.915	8.61e-137
UNI2745	0	0	0	0	0	0	0	0	0	0	11	19	0	23	61	0	4	0	Archaea;Euryarchaeota;Thermoplasmata;Marine_Group_II;uncultured_archaeon	HQ529786.1.914	99.522	0
UNI3056	4	0	0	0	0	0	0	0	0	0	0	5	0	8	54	0	0	0	Archaea;Euryarchaeota;Thermoplasmata;Marine_Group_II;uncultured_euryarchaeote	EU486885.1.915	99.522	0
UNI458	0	0	3	0	0	0	2	3	1	0	0	10	0	0	0	24	59	8	Archaea;Euryarchaeota;Thermoplasmata;Marine_Group_II;uncultured_euryarchaeote	EF069336.1.1439	96.89	0
UNI1222	0	0	2	1	0	1	7	3	3	0	0	6	1	0	0	13	22	2	Archaea;Euryarchaeota;Thermoplasmata;Marine_Group_II;uncultured_euryarchaeote	EF069336.1.1439	97.129	0
UNI2707	0	0	1	1	0	0	0	1	0	0	0	9	1	0	0	2	39	2	Archaea;Euryarchaeota;Thermoplasmata;Marine_Group_II;uncultured_euryarchaeote	EF069336.1.1439	97.368	0
UNI3220	0	0	1	0	1	1	0	0	1	0	0	2	3	0	0	3	16	1	Archaea;Euryarchaeota;Thermoplasmata;Marine_Group_II;uncultured_euryarchaeote	FJ487464.1.1403	99.761	0
UNI1810	0	0	1	0	0	1	1	0	0	0	0	3	1	0	0	6	18	6	Archaea;Euryarchaeota;Thermoplasmata;Marine_Group_II;uncultured_euryarchaeote	EF069336.1.1439	97.129	0
UNI2820	0	0	0	3	1	1	1	1	0	0	0	3	9	0	0	15	52	1	Archaea;Euryarchaeota;Thermoplasmata;Marine_Group_II;uncultured_euryarchaeote	FJ487464.1.1403	99.522	0
UNI2959	0	0	0	1	0	0	1	1	0	0	0	3	7	0	0	6	27	3	Archaea;Euryarchaeota;Thermoplasmata;Marine_Group_II;uncultured_euryarchaeote	FJ487464.1.1403	99.522	0
UNI758	0	0	0	0	0	0	3	1	1	0	0	8	1	0	0	25	32	5	Archaea;Euryarchaeota;Thermoplasmata;Marine_Group_II;uncultured_euryarchaeote	EF069336.1.1439	96.89	0
UNI3384	0	2	0	0	0	0	0	0	0	3	0	0	0	20	38	0	0	0	Archaea;Euryarchaeota;Thermoplasmata;Marine_Group_II;uncultured_marine_group_II_euryarchaeote_KM3-85-F5	EU686616.36653.38121	99.522	0
UNI3147	8	0	0	4	0	0	4	0	3	0	0	0	0	0	0	4	10	0	Archaea;Nanoarchaeaeota;Woesearchaeia;uncultured_archaeon	EF444613.1.1218	92.162	2.3e-167
UNI2801	12	18	1	2	0	12	0	0	0	0	0	0	0	0	0	0	0	0	Archaea;Nanoarchaeaeota;Woesearchaeia;uncultured_archaeon	LC139864.1.900	87.886	8.64e-137
UNI2567	12	23	5	0	0	19	0	0	0	0	0	0	0	0	0	0	0	0	Archaea;Nanoarchaeaeota;Woesearchaeia;uncultured_archaeon	LC139864.1.900	87.648	4.02e-135
UNI2949	0	0	9	11	0	0	4	0	0	0	0	0	7	0	0	4	6	0	Archaea;Nanoarchaeaeota;Woesearchaeia;uncultured_archaeon	LC139864.1.900	87.589	4.02e-135
UNI2354	0	0	0	30	0	0	0	0	0	0	0	0	12	0	0	1	2	0	Archaea;Nanoarchaeaeota;Woesearchaeia;uncultured_archaeon	LC139864.1.900	87.828	8.64e-137
UNI3501	8	45	12	0	0	0	13	6	2	0	0	6	0	0	0	5	3	4	Archaea;Nanoarchaeaeota;Woesearchaeia;uncultured_bacterium	LN864967.1.925	94.033	1.05e-180
UNI2475	0	0	0	41	0	0	0	0	0	0	0	0	4	0	0	0	1	0	Archaea;Nanoarchaeaeota;Woesearchaeia;uncultured_euryarchaeote	KJ566459.1.949	91.148	1.39e-159
UNI2550	0	0	0	27	0	0	0	0	0	0	0	0	2	0	0	0	0	0	Archaea;Nanoarchaeaeota;Woesearchaeia;uncultured_euryarchaeote	KJ566459.1.949	91.148	1.39e-159
UNI1999	15	19	0	0	3	1	0	0	0	0	0	0	1	0	0	0	0	0	Archaea;Thaumarchaeota;Marine_Benthic_Group_A;uncultured_archaeon_W5-61a	JQ085825.17904.19402	99.761	0
UNI227	16	9	7	44	16	8	0	1	0	0	0	18	62	0	0	0	28	0	Archaea;Thaumarchaeota;Marine_Benthic_Group_A;uncultured_archaeon_W5-61a	JQ085825.17904.19402	99.761	0
UNI1046	17	21	0	0	1	0	0	0	0	0	0	7	5	0	0	0	0	0	Archaea;Thaumarchaeota;Marine_Benthic_Group_A;uncultured_archaeon_W5-61a	JQ085825.17904.19402	99.282	0
UNI1347	16	19	0	2	2	0	0	0	0	0	0	1	0	0	0	0	1	0	Archaea;Thaumarchaeota;Marine_Benthic_Group_A;uncultured_archaeon_W5-61a	JQ085825.17904.19402	99.522	0
UNI957	2	9	1	0	1	0	0	1	0	0	8	14	0	0	0	0	19	0	Archaea;Thaumarchaeota;Marine_Benthic_Group_A;uncultured_archaeon_W5-61a	JQ085825.17904.19402	99.282	0
UNI357	16	8	1	29	4	2	0	1	0	0	1	5	45	0	0	0	8	0	Archaea;Thaumarchaeota;Marine_Benthic_Group_A;uncultured_archaeon_W5-61a	JQ085825.17904.19402	100	0
UNI201	21	5	2	31	4	4	0	2	0	0	0	21	61	0	0	0	30	0	Archaea;Thaumarchaeota;Marine_Benthic_Group_A;uncultured_archaeon_W5-61a	JQ085825.17904.19402	99.761	0
UNI2173	8	5	1	8	2	3	0	0	0	0	0	2	2	0	0	0	4	0	Archaea;Thaumarchaeota;Marine_Benthic_Group_A;uncultured_archaeon_W5-61a	JQ085825.17904.19402	99.761	0
UNI3233	9	6	0	0	2	0	0	0	0	0	0	0	2	0	0	0	0	0	Archaea;Thaumarchaeota;Marine_Benthic_Group_A;uncultured_archaeon_W5-61a	JQ085825.17904.19402	99.282	0
UNI154	6	11	5	25	10	12	0	0	0	0	0	22	93	0	0	0	56	0	Archaea;Thaumarchaeota;Marine_Benthic_Group_A;uncultured_archaeon_W5-61a	JQ085825.17904.19402	99.522	0
UNI766	7	3	2	7	4	7	0	1	0	0	2	3	22	0	0	0	9	0	Archaea;Thaumarchaeota;Marine_Benthic_Group_A;uncultured_archaeon_W5-61a	JQ085825.17904.19402	99.522	0
UNI1315	1	4	3	0	2	0	0	0	0	0	1	12	0	0	0	0	21	0	Archaea;Thaumarchaeota;Marine_Benthic_Group_A;uncultured_archaeon_W5-61a	JQ085825.17904.19402	99.522	0
UNI1831	0	0	0	0	10	9	0	0	0	0	0	0	0	0	0	0	0	0	Archaea;Thaumarchaeota;Marine_Benthic_Group_A;uncultured_archaeon_W5-61a	JQ085825.17904.19402	99.522	0
UNI426	26	17	11	17	4	3	2	5	0	0	0	8	10	3	0	4	9	0	Archaea;Thaumarchaeota;Marine_Benthic_Group_A;uncultured_crenarchaeote	FJ487454.1.1433	99.043	0
UNI1057	12	10	4	17	3	0	2	2	0	0	0	2	2	0	0	2	5	0	Archaea;Thaumarchaeota;Marine_Benthic_Group_A;uncultured_crenarchaeote	FJ487454.1.1433	99.282	0
UNI1993	5	1	8	4	2	5	5	2	0	0	0	4	0	0	0	3	5	0	Archaea;Thaumarchaeota;Marine_Benthic_Group_A;uncultured_crenarchaeote	FJ487454.1.1433	100	0
UNI1463	2	0	0	0	29	19	1	1	0	0	0	0	0	0	0	0	6	3	Archaea;Thaumarchaeota;Marine_Benthic_Group_A;uncultured_crenarchaeote	FJ487454.1.1433	99.282	0
UNI2046	6	1	4	1	2	2	6	1	0	0	0	0	0	0	0	2	6	0	Archaea;Thaumarchaeota;Marine_Benthic_Group_A;uncultured_crenarchaeote	FJ487454.1.1433	99.522	0
UNI407	7	7	9	4	1	3	3	13	0	0	0	6	0	0	0	19	34	0	Archaea;Thaumarchaeota;Marine_Benthic_Group_A;uncultured_crenarchaeote	FJ487454.1.1433	99.761	0
UNI2505	4	3	0	6	1	0	5	1	0	0	0	2	6	2	0	0	2	0	Archaea;Thaumarchaeota;Marine_Benthic_Group_A;uncultured_crenarchaeote	FJ487454.1.1433	99.522	0
UNI867	4	4	4	0	2	5	5	4	1	0	0	5	1	0	0	13	18	0	Archaea;Thaumarchaeota;Marine_Benthic_Group_A;uncultured_crenarchaeote	FJ487454.1.1433	99.761	0
UNI803	5	14	3	14	0	0	1	2	0	0	0	1	9	2	0	1	7	0	Archaea;Thaumarchaeota;Marine_Benthic_Group_A;uncultured_crenarchaeote	FJ487454.1.1433	99.282	0
UNI2534	1	1	0	0	0	1	4	1	0	0	0	3	0	0	0	1	7	0	Archaea;Thaumarchaeota;Marine_Benthic_Group_A;uncultured_crenarchaeote	FJ487454.1.1433	99.761	0
UNI492	0	4	8	3	3	7	8	7	0	0	0	4	2	0	0	17	33	0	Archaea;Thaumarchaeota;Marine_Benthic_Group_A;uncultured_crenarchaeote	FJ487454.1.1433	99.522	0
UNI1764	0	0	1	0	0	0	10	0	0	0	0	0	3	0	0	9	3	1	Archaea;Thaumarchaeota;Marine_Benthic_Group_A;uncultured_crenarchaeote	FJ487454.1.1433	99.282	0
UNI2153	0	0	1	0	0	0	9	0	0	0	0	1	2	0	0	9	1	0	Archaea;Thaumarchaeota;Marine_Benthic_Group_A;uncultured_crenarchaeote	FJ487454.1.1433	99.522	0
UNI2154	0	0	0	0	10	21	1	0	0	0	0	0	0	0	0	0	2	0	Archaea;Thaumarchaeota;Marine_Benthic_Group_A;uncultured_crenarchaeote	FJ487454.1.1433	99.043	0
UNI58	25	27	22	192	1	2	12	7	0	0	0	22	125	0	0	29	48	0	Archaea;Thaumarchaeota;Nitrososphaeria;Nitrosopumilales;Nitrosopumilaceae;Brassica_napus_(rape)	JMKK01042200.20125.21581	99.522	0
UNI120	7	16	9	204	4	3	6	2	0	0	0	17	26	0	0	6	9	0	Archaea;Thaumarchaeota;Nitrososphaeria;Nitrosopumilales;Nitrosopumilaceae;Brassica_napus_(rape)	JMKK01042200.20125.21581	100	0
UNI339	14	11	17	46	1	0	6	6	0	0	0	5	19	0	0	1	5	0	Archaea;Thaumarchaeota;Nitrososphaeria;Nitrosopumilales;Nitrosopumilaceae;Brassica_napus_(rape)	JMKK01042200.20125.21581	99.522	0
UNI627	6	5	6	51	0	2	5	1	0	0	0	1	7	0	0	2	5	0	Archaea;Thaumarchaeota;Nitrososphaeria;Nitrosopumilales;Nitrosopumilaceae;Brassica_napus_(rape)	JMKK01042200.20125.21581	99.761	0
UNI99	8	14	14	250	1	2	12	8	0	0	0	12	34	0	0	9	8	0	Archaea;Thaumarchaeota;Nitrososphaeria;Nitrosopumilales;Nitrosopumilaceae;Brassica_napus_(rape)	JMKK01042200.20125.21581	99.761	0
UNI86	17	26	27	184	0	0	25	14	0	0	0	15	82	0	0	23	24	0	Archaea;Thaumarchaeota;Nitrososphaeria;Nitrosopumilales;Nitrosopumilaceae;Brassica_napus_(rape)	JMKK01042200.20125.21581	99.761	0
UNI2619	0	0	23	0	1	0	1	0	0	0	0	20	0	0	0	0	2	0	Archaea;Thaumarchaeota;Nitrososphaeria;Nitrosopumilales;Nitrosopumilaceae;Candidatus_Nitrosopelagicus;uncultured_archaeon	GQ994250.1.917	99.043	0
UNI3284	0	2	0	0	0	0	0	0	0	0	11	0	0	0	17	6	0	0	Archaea;Thaumarchaeota;Nitrososphaeria;Nitrosopumilales;Nitrosopumilaceae;Candidatus_Nitrosopelagicus;uncultured_thaumarchaeote	KF954270.1.1439	99.761	0
UNI148	1	16	27	2	49	63	43	14	0	0	0	13	3	0	3	11	4	0	Archaea;Thaumarchaeota;Nitrososphaeria;Nitrosopumilales;Nitrosopumilaceae;Candidatus_Nitrosopumilus;marine_sediment_metagenome	LKGT01002244.3159.4616	99.761	0
UNI69	1	14	42	3	99	92	54	29	0	0	0	26	1	0	0	35	40	0	Archaea;Thaumarchaeota;Nitrososphaeria;Nitrosopumilales;Nitrosopumilaceae;Candidatus_Nitrosopumilus;marine_sediment_metagenome	LKGT01002244.3159.4616	99.522	0
UNI156	70	98	20	11	39	1	5	5	0	0	3	8	5	0	0	0	6	0	Archaea;Thaumarchaeota;Nitrososphaeria;Nitrosopumilales;Nitrosopumilaceae;Candidatus_Nitrosopumilus;uncultured_archaeon	LC139814.1.900	99.76	0
UNI55	47	90	125	11	56	42	58	57	1	0	0	56	0	0	0	27	21	1	Archaea;Thaumarchaeota;Nitrososphaeria;Nitrosopumilales;Nitrosopumilaceae;Candidatus_Nitrosopumilus;uncultured_archaeon	FJ571901.1.1346	99.522	0
UNI1447	2	0	0	0	1	26	0	0	12	0	0	0	0	0	0	0	0	3	Archaea;Thaumarchaeota;Nitrososphaeria;Nitrosopumilales;Nitrosopumilaceae;Candidatus_Nitrosopumilus;uncultured_archaeon	KP204647.1.1397	99.761	0
UNI94	109	129	31	23	80	5	16	13	0	0	3	12	13	0	0	10	6	0	Archaea;Thaumarchaeota;Nitrososphaeria;Nitrosopumilales;Nitrosopumilaceae;Candidatus_Nitrosopumilus;uncultured_archaeon	FJ571901.1.1346	99.522	0
UNI671	10	28	5	22	9	1	0	2	1	0	0	3	5	0	0	0	1	0	Archaea;Thaumarchaeota;Nitrososphaeria;Nitrosopumilales;Nitrosopumilaceae;Candidatus_Nitrosopumilus;uncultured_archaeon	LC139814.1.900	100	0
UNI926	2	14	21	0	32	6	14	16	6	0	0	3	2	0	0	11	5	15	Archaea;Thaumarchaeota;Nitrososphaeria;Nitrosopumilales;Nitrosopumilaceae;Candidatus_Nitrosopumilus;uncultured_archaeon	GU207312.1.915	99.522	0
UNI19	64	132	213	72	77	72	106	64	2	0	1	92	25	0	0	90	57	2	Archaea;Thaumarchaeota;Nitrososphaeria;Nitrosopumilales;Nitrosopumilaceae;Candidatus_Nitrosopumilus;uncultured_archaeon	FJ571901.1.1346	99.761	0
UNI233	41	76	21	5	30	4	8	7	0	0	3	6	7	0	0	2	2	0	Archaea;Thaumarchaeota;Nitrososphaeria;Nitrosopumilales;Nitrosopumilaceae;Candidatus_Nitrosopumilus;uncultured_archaeon	FJ571901.1.1346	99.282	0
UNI14	107	245	332	61	115	111	172	126	2	0	0	268	52	1	0	167	151	0	Archaea;Thaumarchaeota;Nitrososphaeria;Nitrosopumilales;Nitrosopumilaceae;Candidatus_Nitrosopumilus;uncultured_archaeon	FJ571901.1.1346	99.522	0
UNI686	9	27	14	17	8	1	1	4	0	0	1	5	9	0	0	0	6	0	Archaea;Thaumarchaeota;Nitrososphaeria;Nitrosopumilales;Nitrosopumilaceae;Candidatus_Nitrosopumilus;uncultured_archaeon	LC139814.1.900	99.76	0
UNI2323	3	5	8	0	9	1	1	1	0	0	1	1	0	0	0	0	1	0	Archaea;Thaumarchaeota;Nitrososphaeria;Nitrosopumilales;Nitrosopumilaceae;Candidatus_Nitrosopumilus;uncultured_archaeon	KP204640.1.1397	99.282	0
UNI88	105	127	32	8	65	5	8	6	0	0	10	17	3	1	0	4	5	0	Archaea;Thaumarchaeota;Nitrososphaeria;Nitrosopumilales;Nitrosopumilaceae;Candidatus_Nitrosopumilus;uncultured_archaeon	LC139814.1.900	99.52	0
UNI16	19	79	169	4	41	170	171	198	464	0	2	34	2	0	0	94	121	138	Archaea;Thaumarchaeota;Nitrososphaeria;Nitrosopumilales;Nitrosopumilaceae;Candidatus_Nitrosopumilus;uncultured_archaeon	FJ571785.1.1346	99.522	0
UNI520	3	10	25	1	3	7	18	7	2	0	0	14	0	0	0	21	1	2	Archaea;Thaumarchaeota;Nitrososphaeria;Nitrosopumilales;Nitrosopumilaceae;Candidatus_Nitrosopumilus;uncultured_archaeon	KP204666.1.1397	100	0
UNI845	3	6	6	5	5	8	2	3	42	8	0	3	0	0	0	0	0	16	Archaea;Thaumarchaeota;Nitrososphaeria;Nitrosopumilales;Nitrosopumilaceae;Candidatus_Nitrosopumilus;uncultured_archaeon	KP204650.1.1397	99.761	0
UNI167	58	87	29	6	37	2	10	8	0	0	1	10	4	0	0	3	4	0	Archaea;Thaumarchaeota;Nitrososphaeria;Nitrosopumilales;Nitrosopumilaceae;Candidatus_Nitrosopumilus;uncultured_archaeon	FJ571901.1.1346	99.761	0
UNI272	4	4	52	15	0	0	21	8	0	0	0	10	7	0	0	11	9	0	Archaea;Thaumarchaeota;Nitrososphaeria;Nitrosopumilales;Nitrosopumilaceae;Candidatus_Nitrosopumilus;uncultured_archaeon	LC080984.1.1440	99.761	0
UNI5	62	171	370	12	128	462	515	417	1154	0	4	336	57	4	4	560	624	586	Archaea;Thaumarchaeota;Nitrososphaeria;Nitrosopumilales;Nitrosopumilaceae;Candidatus_Nitrosopumilus;uncultured_archaeon	FJ571785.1.1346	99.522	0
UNI3473	3	5	6	12	5	8	14	3	2	0	0	0	0	0	0	0	0	0	Archaea;Thaumarchaeota;Nitrososphaeria;Nitrosopumilales;Nitrosopumilaceae;Candidatus_Nitrosopumilus;uncultured_archaeon	FJ571901.1.1346	98.565	0
UNI707	4	30	18	5	29	15	15	15	19	0	0	10	1	0	1	17	5	17	Archaea;Thaumarchaeota;Nitrososphaeria;Nitrosopumilales;Nitrosopumilaceae;Candidatus_Nitrosopumilus;uncultured_archaeon	GU207312.1.915	100	0
UNI17	94	175	312	35	101	94	143	119	6	0	0	172	34	0	0	116	129	2	Archaea;Thaumarchaeota;Nitrososphaeria;Nitrosopumilales;Nitrosopumilaceae;Candidatus_Nitrosopumilus;uncultured_archaeon	FJ571901.1.1346	99.761	0
UNI27	11	54	87	9	26	125	101	91	286	0	1	15	2	1	1	40	44	56	Archaea;Thaumarchaeota;Nitrososphaeria;Nitrosopumilales;Nitrosopumilaceae;Candidatus_Nitrosopumilus;uncultured_archaeon	FJ571785.1.1346	99.761	0
UNI2830	1	5	1	0	11	0	0	0	0	0	0	0	0	0	0	0	0	2	Archaea;Thaumarchaeota;Nitrososphaeria;Nitrosopumilales;Nitrosopumilaceae;Candidatus_Nitrosopumilus;uncultured_archaeon	KP204686.1.1397	99.043	0
UNI100	8	9	100	26	0	0	50	29	0	0	0	41	44	0	0	33	29	0	Archaea;Thaumarchaeota;Nitrososphaeria;Nitrosopumilales;Nitrosopumilaceae;Candidatus_Nitrosopumilus;uncultured_archaeon	LC080984.1.1440	99.522	0
UNI1487	6	3	1	12	10	0	0	0	0	0	0	2	0	0	0	0	0	0	Archaea;Thaumarchaeota;Nitrososphaeria;Nitrosopumilales;Nitrosopumilaceae;Candidatus_Nitrosopumilus;uncultured_archaeon	LC139814.1.900	99.281	0
UNI29	46	139	191	63	80	46	88	68	2	0	0	67	17	0	0	60	38	1	Archaea;Thaumarchaeota;Nitrososphaeria;Nitrosopumilales;Nitrosopumilaceae;Candidatus_Nitrosopumilus;uncultured_archaeon	FJ571901.1.1346	100	0
UNI250	4	17	31	0	7	10	37	9	4	0	0	15	2	0	0	38	6	3	Archaea;Thaumarchaeota;Nitrososphaeria;Nitrosopumilales;Nitrosopumilaceae;Candidatus_Nitrosopumilus;uncultured_archaeon	KP204666.1.1397	99.761	0
UNI433	31	46	13	6	24	1	3	2	0	0	1	1	2	0	0	0	0	0	Archaea;Thaumarchaeota;Nitrososphaeria;Nitrosopumilales;Nitrosopumilaceae;Candidatus_Nitrosopumilus;uncultured_archaeon	FJ571901.1.1346	99.522	0
UNI11	32	110	195	14	73	230	242	213	585	0	2	99	23	1	1	182	183	208	Archaea;Thaumarchaeota;Nitrososphaeria;Nitrosopumilales;Nitrosopumilaceae;Candidatus_Nitrosopumilus;uncultured_archaeon	FJ571785.1.1346	100	0
UNI9	38	100	194	17	67	305	289	219	664	0	5	149	27	1	2	237	241	241	Archaea;Thaumarchaeota;Nitrososphaeria;Nitrosopumilales;Nitrosopumilaceae;Candidatus_Nitrosopumilus;uncultured_archaeon	FJ571785.1.1346	99.761	0
UNI1093	4	12	9	0	5	4	2	1	0	0	2	5	2	0	0	4	0	0	Archaea;Thaumarchaeota;Nitrososphaeria;Nitrosopumilales;Nitrosopumilaceae;Candidatus_Nitrosopumilus;uncultured_archaeon	KP204640.1.1397	99.522	0
UNI2011	3	15	11	0	2	1	4	9	1	0	0	5	1	0	0	0	5	0	Archaea;Thaumarchaeota;Nitrososphaeria;Nitrosopumilales;Nitrosopumilaceae;Candidatus_Nitrosopumilus;uncultured_archaeon	AY856365.1.1440	99.761	0
UNI674	4	7	19	1	8	5	0	2	0	0	2	15	0	0	0	4	3	0	Archaea;Thaumarchaeota;Nitrososphaeria;Nitrosopumilales;Nitrosopumilaceae;Candidatus_Nitrosopumilus;uncultured_archaeon	KP204640.1.1397	99.282	0
UNI7	65	174	324	13	109	463	421	322	1075	0	5	270	34	3	8	441	464	424	Archaea;Thaumarchaeota;Nitrososphaeria;Nitrosopumilales;Nitrosopumilaceae;Candidatus_Nitrosopumilus;uncultured_archaeon	FJ571785.1.1346	99.761	0
UNI1798	3	0	6	0	0	9	13	10	13	0	0	0	0	0	0	0	0	0	Archaea;Thaumarchaeota;Nitrososphaeria;Nitrosopumilales;Nitrosopumilaceae;Candidatus_Nitrosopumilus;uncultured_archaeon	FJ571750.1.1346	98.325	0
UNI2649	5	0	0	0	15	1	0	2	0	0	0	0	0	0	0	0	0	0	Archaea;Thaumarchaeota;Nitrososphaeria;Nitrosopumilales;Nitrosopumilaceae;Candidatus_Nitrosopumilus;uncultured_archaeon	KP204640.1.1397	99.043	0
UNI924	3	3	17	0	5	7	9	6	4	0	0	5	1	0	0	6	0	2	Archaea;Thaumarchaeota;Nitrososphaeria;Nitrosopumilales;Nitrosopumilaceae;Candidatus_Nitrosopumilus;uncultured_archaeon	KP204666.1.1397	99.522	0
UNI2474	8	7	8	9	8	7	24	5	2	0	0	0	0	0	0	0	0	0	Archaea;Thaumarchaeota;Nitrososphaeria;Nitrosopumilales;Nitrosopumilaceae;Candidatus_Nitrosopumilus;uncultured_archaeon	FJ571901.1.1346	98.325	0
UNI1137	2	6	4	0	3	0	8	10	2	0	0	7	2	0	0	10	11	4	Archaea;Thaumarchaeota;Nitrososphaeria;Nitrosopumilales;Nitrosopumilaceae;Candidatus_Nitrosopumilus;uncultured_archaeon	KP204686.1.1397	99.282	0
UNI1826	4	3	2	18	0	0	0	0	0	0	0	3	5	0	0	0	0	0	Archaea;Thaumarchaeota;Nitrososphaeria;Nitrosopumilales;Nitrosopumilaceae;Candidatus_Nitrosopumilus;uncultured_archaeon	KP204635.1.1397	98.804	0
UNI995	9	3	3	16	9	2	1	0	0	0	0	0	6	0	0	0	0	0	Archaea;Thaumarchaeota;Nitrososphaeria;Nitrosopumilales;Nitrosopumilaceae;Candidatus_Nitrosopumilus;uncultured_archaeon	LC139814.1.900	99.52	0
UNI1518	1	5	7	0	1	6	8	4	3	0	0	1	0	0	0	7	1	0	Archaea;Thaumarchaeota;Nitrososphaeria;Nitrosopumilales;Nitrosopumilaceae;Candidatus_Nitrosopumilus;uncultured_archaeon	KP204666.1.1397	99.761	0
UNI134	2	1	35	0	0	2	29	48	0	0	0	29	1	0	0	33	40	1	Archaea;Thaumarchaeota;Nitrososphaeria;Nitrosopumilales;Nitrosopumilaceae;Candidatus_Nitrosopumilus;uncultured_archaeon	KP204643.1.1397	99.043	0
UNI1690	8	29	0	0	0	0	0	2	0	0	0	1	0	0	0	0	16	0	Archaea;Thaumarchaeota;Nitrososphaeria;Nitrosopumilales;Nitrosopumilaceae;Candidatus_Nitrosopumilus;uncultured_archaeon	GU207312.1.915	98.804	0
UNI197	5	6	89	5	0	0	32	24	0	0	0	18	21	0	0	20	13	0	Archaea;Thaumarchaeota;Nitrososphaeria;Nitrosopumilales;Nitrosopumilaceae;Candidatus_Nitrosopumilus;uncultured_archaeon	LC080984.1.1440	99.761	0
UNI571	2	1	8	1	3	14	5	12	45	6	0	12	0	0	0	2	5	18	Archaea;Thaumarchaeota;Nitrososphaeria;Nitrosopumilales;Nitrosopumilaceae;Candidatus_Nitrosopumilus;uncultured_archaeon	KP204650.1.1397	99.522	0
UNI831	2	15	19	2	0	1	6	15	1	0	0	5	3	0	0	15	6	4	Archaea;Thaumarchaeota;Nitrososphaeria;Nitrosopumilales;Nitrosopumilaceae;Candidatus_Nitrosopumilus;uncultured_archaeon	AY856365.1.1440	99.522	0
UNI189	4	48	46	4	58	25	28	58	49	0	0	11	5	0	0	24	39	38	Archaea;Thaumarchaeota;Nitrososphaeria;Nitrosopumilales;Nitrosopumilaceae;Candidatus_Nitrosopumilus;uncultured_archaeon	GU207312.1.915	99.761	0
UNI303	4	32	45	13	49	18	29	29	46	0	0	13	2	0	0	22	19	29	Archaea;Thaumarchaeota;Nitrososphaeria;Nitrosopumilales;Nitrosopumilaceae;Candidatus_Nitrosopumilus;uncultured_archaeon	GU207312.1.915	99.761	0
UNI133	19	79	63	17	30	28	30	30	1	0	0	13	6	0	0	15	6	1	Archaea;Thaumarchaeota;Nitrososphaeria;Nitrosopumilales;Nitrosopumilaceae;Candidatus_Nitrosopumilus;uncultured_archaeon	FJ571901.1.1346	99.761	0
UNI366	3	3	7	2	3	5	0	11	70	0	0	2	5	0	0	2	5	30	Archaea;Thaumarchaeota;Nitrososphaeria;Nitrosopumilales;Nitrosopumilaceae;Candidatus_Nitrosopumilus;uncultured_archaeon	KP204643.1.1397	99.522	0
UNI168	5	56	59	3	52	24	32	74	69	0	0	22	6	0	0	33	35	58	Archaea;Thaumarchaeota;Nitrososphaeria;Nitrosopumilales;Nitrosopumilaceae;Candidatus_Nitrosopumilus;uncultured_archaeon	GU207312.1.915	99.522	0
UNI1345	5	3	6	0	1	0	1	3	2	0	0	4	1	0	0	8	7	0	Archaea;Thaumarchaeota;Nitrososphaeria;Nitrosopumilales;Nitrosopumilaceae;Candidatus_Nitrosopumilus;uncultured_archaeon	KP204686.1.1397	99.522	0
UNI684	2	1	7	0	1	8	2	10	33	4	0	3	0	0	0	0	1	18	Archaea;Thaumarchaeota;Nitrososphaeria;Nitrosopumilales;Nitrosopumilaceae;Candidatus_Nitrosopumilus;uncultured_archaeon	KP204650.1.1397	99.761	0
UNI105	4	1	56	0	0	2	31	44	0	0	0	43	2	0	0	54	73	0	Archaea;Thaumarchaeota;Nitrososphaeria;Nitrosopumilales;Nitrosopumilaceae;Candidatus_Nitrosopumilus;uncultured_archaeon	KP204643.1.1397	98.804	0
UNI1856	8	7	4	1	5	0	0	2	0	0	1	0	1	0	0	0	0	0	Archaea;Thaumarchaeota;Nitrososphaeria;Nitrosopumilales;Nitrosopumilaceae;Candidatus_Nitrosopumilus;uncultured_archaeon	FJ571901.1.1346	99.043	0
UNI2352	3	3	0	0	13	4	2	3	5	0	0	8	0	0	0	2	1	0	Archaea;Thaumarchaeota;Nitrososphaeria;Nitrosopumilales;Nitrosopumilaceae;Candidatus_Nitrosopumilus;uncultured_archaeon	AY856365.1.1440	100	0
UNI181	3	3	7	0	1	0	2	22	129	0	2	1	0	0	0	4	15	52	Archaea;Thaumarchaeota;Nitrososphaeria;Nitrosopumilales;Nitrosopumilaceae;Candidatus_Nitrosopumilus;uncultured_archaeon	KP204643.1.1397	99.522	0
UNI1717	5	0	0	0	28	10	0	0	0	0	0	0	0	0	0	0	0	1	Archaea;Thaumarchaeota;Nitrososphaeria;Nitrosopumilales;Nitrosopumilaceae;Candidatus_Nitrosopumilus;uncultured_archaeon	KP204678.1.1397	99.522	0
UNI693	4	7	36	5	0	0	13	8	0	0	0	7	5	0	0	5	3	0	Archaea;Thaumarchaeota;Nitrososphaeria;Nitrosopumilales;Nitrosopumilaceae;Candidatus_Nitrosopumilus;uncultured_archaeon	LC080984.1.1440	99.522	0
UNI574	4	1	14	0	7	8	2	3	11	0	0	8	0	0	0	2	11	4	Archaea;Thaumarchaeota;Nitrososphaeria;Nitrosopumilales;Nitrosopumilaceae;Candidatus_Nitrosopumilus;uncultured_archaeon	KP204650.1.1397	99.282	0
UNI2013	1	0	10	0	5	14	8	3	13	0	0	0	0	0	0	0	0	0	Archaea;Thaumarchaeota;Nitrososphaeria;Nitrosopumilales;Nitrosopumilaceae;Candidatus_Nitrosopumilus;uncultured_archaeon	FJ571750.1.1346	98.565	0
UNI2427	1	6	9	0	2	2	3	14	1	0	0	3	0	0	0	3	2	1	Archaea;Thaumarchaeota;Nitrososphaeria;Nitrosopumilales;Nitrosopumilaceae;Candidatus_Nitrosopumilus;uncultured_archaeon	AY856365.1.1440	99.282	0
UNI139	1	1	0	0	3	27	0	6	147	0	1	2	0	0	5	0	4	57	Archaea;Thaumarchaeota;Nitrososphaeria;Nitrosopumilales;Nitrosopumilaceae;Candidatus_Nitrosopumilus;uncultured_archaeon	FJ571707.1.1346	99.522	0
UNI3320	2	0	0	0	0	7	0	0	4	0	0	0	0	0	0	0	0	1	Archaea;Thaumarchaeota;Nitrososphaeria;Nitrosopumilales;Nitrosopumilaceae;Candidatus_Nitrosopumilus;uncultured_archaeon	KP204647.1.1397	99.522	0
UNI718	13	15	2	15	9	0	2	0	0	0	3	1	7	0	0	0	0	0	Archaea;Thaumarchaeota;Nitrososphaeria;Nitrosopumilales;Nitrosopumilaceae;Candidatus_Nitrosopumilus;uncultured_archaeon	LC139814.1.900	99.281	0
UNI3352	1	2	0	6	4	0	0	0	0	0	0	1	0	0	0	0	0	0	Archaea;Thaumarchaeota;Nitrososphaeria;Nitrosopumilales;Nitrosopumilaceae;Candidatus_Nitrosopumilus;uncultured_archaeon	LC139814.1.900	99.52	0
UNI172	4	16	33	1	9	20	36	15	10	0	0	32	4	0	0	61	18	1	Archaea;Thaumarchaeota;Nitrososphaeria;Nitrosopumilales;Nitrosopumilaceae;Candidatus_Nitrosopumilus;uncultured_archaeon	KP204666.1.1397	99.522	0
UNI1505	3	3	4	0	5	0	8	25	20	0	0	2	0	0	0	3	7	21	Archaea;Thaumarchaeota;Nitrososphaeria;Nitrosopumilales;Nitrosopumilaceae;Candidatus_Nitrosopumilus;uncultured_archaeon	KP204686.1.1397	99.522	0
UNI285	2	0	0	0	2	19	0	6	88	0	0	0	0	0	1	0	5	27	Archaea;Thaumarchaeota;Nitrososphaeria;Nitrosopumilales;Nitrosopumilaceae;Candidatus_Nitrosopumilus;uncultured_archaeon	FJ571707.1.1346	99.761	0
UNI1800	2	2	0	0	19	5	0	0	0	0	0	0	0	0	0	0	1	0	Archaea;Thaumarchaeota;Nitrososphaeria;Nitrosopumilales;Nitrosopumilaceae;Candidatus_Nitrosopumilus;uncultured_archaeon	KP204640.1.1397	98.804	0
UNI2456	2	9	0	0	16	0	1	0	1	0	0	0	0	0	0	0	0	0	Archaea;Thaumarchaeota;Nitrososphaeria;Nitrosopumilales;Nitrosopumilaceae;Candidatus_Nitrosopumilus;uncultured_archaeon	KP204686.1.1397	99.282	0
UNI1236	2	9	41	0	5	5	18	47	19	0	0	3	0	0	0	5	12	10	Archaea;Thaumarchaeota;Nitrososphaeria;Nitrosopumilales;Nitrosopumilaceae;Candidatus_Nitrosopumilus;uncultured_archaeon	KP204650.1.1397	99.522	0
UNI395	1	4	13	0	1	2	6	6	6	0	0	14	5	0	0	28	30	3	Archaea;Thaumarchaeota;Nitrososphaeria;Nitrosopumilales;Nitrosopumilaceae;Candidatus_Nitrosopumilus;uncultured_archaeon	KP204686.1.1397	99.043	0
UNI3360	1	2	0	0	2	4	0	0	5	0	0	0	0	0	0	0	0	1	Archaea;Thaumarchaeota;Nitrososphaeria;Nitrosopumilales;Nitrosopumilaceae;Candidatus_Nitrosopumilus;uncultured_archaeon	KP204685.1.1397	99.761	0
UNI1541	2	7	7	0	6	0	1	1	0	0	3	1	3	0	0	0	0	0	Archaea;Thaumarchaeota;Nitrososphaeria;Nitrosopumilales;Nitrosopumilaceae;Candidatus_Nitrosopumilus;uncultured_archaeon	KP204640.1.1397	99.761	0
UNI214	2	26	6	0	80	42	7	7	0	0	0	0	0	0	7	7	3	0	Archaea;Thaumarchaeota;Nitrososphaeria;Nitrosopumilales;Nitrosopumilaceae;Candidatus_Nitrosopumilus;uncultured_archaeon	KY563092.1.1397	99.522	0
UNI2641	2	5	3	9	0	3	0	0	0	0	0	1	11	0	0	0	0	0	Archaea;Thaumarchaeota;Nitrososphaeria;Nitrosopumilales;Nitrosopumilaceae;Candidatus_Nitrosopumilus;uncultured_archaeon	GU207312.1.915	99.043	0
UNI2908	1	0	1	15	0	2	0	1	0	0	0	0	2	0	0	0	0	0	Archaea;Thaumarchaeota;Nitrososphaeria;Nitrosopumilales;Nitrosopumilaceae;Candidatus_Nitrosopumilus;uncultured_archaeon	LC139814.1.900	99.76	0
UNI865	12	7	10	6	6	0	0	0	0	0	0	2	8	0	0	1	0	0	Archaea;Thaumarchaeota;Nitrososphaeria;Nitrosopumilales;Nitrosopumilaceae;Candidatus_Nitrosopumilus;uncultured_archaeon	FJ571901.1.1346	99.522	0
UNI572	1	4	14	0	0	1	5	11	5	0	0	4	2	0	0	22	25	2	Archaea;Thaumarchaeota;Nitrososphaeria;Nitrosopumilales;Nitrosopumilaceae;Candidatus_Nitrosopumilus;uncultured_archaeon	KP204686.1.1397	99.282	0
UNI451	3	9	11	0	6	11	8	1	11	0	0	8	3	0	0	7	12	7	Archaea;Thaumarchaeota;Nitrososphaeria;Nitrosopumilales;Nitrosopumilaceae;Candidatus_Nitrosopumilus;uncultured_archaeon	KP204650.1.1397	99.043	0
UNI317	1	0	16	1	0	1	21	38	0	0	0	21	0	0	0	13	21	0	Archaea;Thaumarchaeota;Nitrososphaeria;Nitrosopumilales;Nitrosopumilaceae;Candidatus_Nitrosopumilus;uncultured_archaeon	KP204643.1.1397	99.282	0
UNI160	1	3	9	0	1	11	6	16	123	0	0	9	5	0	0	7	20	79	Archaea;Thaumarchaeota;Nitrososphaeria;Nitrosopumilales;Nitrosopumilaceae;Candidatus_Nitrosopumilus;uncultured_archaeon	KP204643.1.1397	99.282	0
UNI533	2	8	18	0	1	2	8	27	69	0	0	2	0	0	0	0	4	19	Archaea;Thaumarchaeota;Nitrososphaeria;Nitrosopumilales;Nitrosopumilaceae;Candidatus_Nitrosopumilus;uncultured_archaeon	KP204643.1.1397	99.282	0
UNI856	2	6	48	2	7	2	15	48	13	0	0	7	1	0	0	2	16	18	Archaea;Thaumarchaeota;Nitrososphaeria;Nitrosopumilales;Nitrosopumilaceae;Candidatus_Nitrosopumilus;uncultured_archaeon	KP204650.1.1397	99.282	0
UNI1157	2	3	6	0	6	7	3	2	4	0	0	3	0	0	0	3	2	1	Archaea;Thaumarchaeota;Nitrososphaeria;Nitrosopumilales;Nitrosopumilaceae;Candidatus_Nitrosopumilus;uncultured_archaeon	KP204650.1.1397	99.522	0
UNI1509	1	7	0	0	15	5	0	2	0	0	0	0	0	0	1	0	0	0	Archaea;Thaumarchaeota;Nitrososphaeria;Nitrosopumilales;Nitrosopumilaceae;Candidatus_Nitrosopumilus;uncultured_archaeon	KY563092.1.1397	99.522	0
UNI79	1	8	32	0	43	37	39	71	26	0	0	19	6	0	0	28	114	19	Archaea;Thaumarchaeota;Nitrososphaeria;Nitrosopumilales;Nitrosopumilaceae;Candidatus_Nitrosopumilus;uncultured_archaeon	KY563092.1.1397	99.761	0
UNI2116	1	6	3	0	1	1	5	3	2	0	0	1	0	0	0	1	11	0	Archaea;Thaumarchaeota;Nitrososphaeria;Nitrosopumilales;Nitrosopumilaceae;Candidatus_Nitrosopumilus;uncultured_archaeon	KP204686.1.1397	99.043	0
UNI152	2	0	0	0	6	32	1	5	126	0	0	1	0	0	5	0	5	65	Archaea;Thaumarchaeota;Nitrososphaeria;Nitrosopumilales;Nitrosopumilaceae;Candidatus_Nitrosopumilus;uncultured_archaeon	FJ571707.1.1346	99.761	0
UNI938	1	5	0	0	0	0	5	18	0	0	0	0	0	0	0	22	19	1	Archaea;Thaumarchaeota;Nitrososphaeria;Nitrosopumilales;Nitrosopumilaceae;Candidatus_Nitrosopumilus;uncultured_archaeon	KP204686.1.1397	99.043	0
UNI338	5	5	13	0	0	24	32	8	7	0	0	18	0	0	0	28	1	2	Archaea;Thaumarchaeota;Nitrososphaeria;Nitrosopumilales;Nitrosopumilaceae;Candidatus_Nitrosopumilus;uncultured_archaeon	KP204666.1.1397	99.761	0
UNI59	1	20	52	2	82	117	60	31	0	0	0	26	8	0	2	46	19	0	Archaea;Thaumarchaeota;Nitrososphaeria;Nitrosopumilales;Nitrosopumilaceae;Candidatus_Nitrosopumilus;uncultured_archaeon	LC139912.1.900	99.52	0
UNI836	2	11	17	0	10	2	1	6	0	0	5	4	0	0	0	3	0	0	Archaea;Thaumarchaeota;Nitrososphaeria;Nitrosopumilales;Nitrosopumilaceae;Candidatus_Nitrosopumilus;uncultured_archaeon	KP204640.1.1397	99.522	0
UNI409	2	15	2	0	46	14	10	2	0	0	0	0	0	0	1	5	1	1	Archaea;Thaumarchaeota;Nitrososphaeria;Nitrosopumilales;Nitrosopumilaceae;Candidatus_Nitrosopumilus;uncultured_archaeon	KY563092.1.1397	99.761	0
UNI578	1	15	27	2	1	3	6	17	1	0	0	18	2	0	0	12	11	6	Archaea;Thaumarchaeota;Nitrososphaeria;Nitrosopumilales;Nitrosopumilaceae;Candidatus_Nitrosopumilus;uncultured_archaeon	AY856365.1.1440	99.282	0
UNI804	1	0	0	0	0	27	0	0	10	0	0	2	0	0	0	0	0	10	Archaea;Thaumarchaeota;Nitrososphaeria;Nitrosopumilales;Nitrosopumilaceae;Candidatus_Nitrosopumilus;uncultured_archaeon	KP204647.1.1397	99.522	0
UNI3541	1	0	1	0	0	0	7	8	0	0	0	0	0	0	0	0	5	0	Archaea;Thaumarchaeota;Nitrososphaeria;Nitrosopumilales;Nitrosopumilaceae;Candidatus_Nitrosopumilus;uncultured_archaeon	KP204686.1.1397	99.043	0
UNI1513	1	12	36	1	8	1	15	44	14	0	0	1	0	0	0	1	7	7	Archaea;Thaumarchaeota;Nitrososphaeria;Nitrosopumilales;Nitrosopumilaceae;Candidatus_Nitrosopumilus;uncultured_archaeon	KP204650.1.1397	99.522	0
UNI1123	1	1	0	0	0	6	1	1	41	0	0	0	0	0	0	0	0	17	Archaea;Thaumarchaeota;Nitrososphaeria;Nitrosopumilales;Nitrosopumilaceae;Candidatus_Nitrosopumilus;uncultured_archaeon	FJ571707.1.1346	99.761	0
UNI1203	1	0	1	0	0	11	2	5	23	2	1	3	1	0	0	0	1	2	Archaea;Thaumarchaeota;Nitrososphaeria;Nitrosopumilales;Nitrosopumilaceae;Candidatus_Nitrosopumilus;uncultured_archaeon	KP204650.1.1397	100	0
UNI1593	3	2	0	0	4	1	7	7	11	0	0	1	0	0	0	4	6	6	Archaea;Thaumarchaeota;Nitrososphaeria;Nitrosopumilales;Nitrosopumilaceae;Candidatus_Nitrosopumilus;uncultured_archaeon	KP204686.1.1397	99.282	0
UNI1619	1	5	2	0	18	9	0	2	4	0	0	2	0	0	0	5	2	2	Archaea;Thaumarchaeota;Nitrososphaeria;Nitrosopumilales;Nitrosopumilaceae;Candidatus_Nitrosopumilus;uncultured_archaeon	AY856365.1.1440	99.522	0
UNI1544	1	2	7	0	0	1	4	9	1	0	0	3	0	0	0	4	21	0	Archaea;Thaumarchaeota;Nitrososphaeria;Nitrosopumilales;Nitrosopumilaceae;Candidatus_Nitrosopumilus;uncultured_archaeon	FJ571941.1.1346	99.282	0
UNI53	2	10	30	0	77	70	40	68	29	0	0	33	10	0	0	40	102	14	Archaea;Thaumarchaeota;Nitrososphaeria;Nitrosopumilales;Nitrosopumilaceae;Candidatus_Nitrosopumilus;uncultured_archaeon	KY563092.1.1397	99.522	0
UNI1456	1	7	6	9	5	1	1	3	0	0	0	3	1	0	0	1	6	0	Archaea;Thaumarchaeota;Nitrososphaeria;Nitrosopumilales;Nitrosopumilaceae;Candidatus_Nitrosopumilus;uncultured_archaeon	LC139814.1.900	99.52	0
UNI2384	2	4	5	0	5	0	2	3	0	0	0	3	1	0	0	0	2	1	Archaea;Thaumarchaeota;Nitrososphaeria;Nitrosopumilales;Nitrosopumilaceae;Candidatus_Nitrosopumilus;uncultured_archaeon	AY856365.1.1440	99.043	0
UNI2634	1	0	0	5	0	0	0	0	0	0	0	2	4	0	0	0	0	0	Archaea;Thaumarchaeota;Nitrososphaeria;Nitrosopumilales;Nitrosopumilaceae;Candidatus_Nitrosopumilus;uncultured_archaeon	KP204635.1.1397	98.565	0
UNI2622	1	2	1	0	2	11	0	0	8	0	0	0	0	0	0	0	2	1	Archaea;Thaumarchaeota;Nitrososphaeria;Nitrosopumilales;Nitrosopumilaceae;Candidatus_Nitrosopumilus;uncultured_archaeon	KP204685.1.1397	99.522	0
UNI1643	1	1	0	1	3	4	3	6	14	0	0	4	0	0	0	1	0	6	Archaea;Thaumarchaeota;Nitrososphaeria;Nitrosopumilales;Nitrosopumilaceae;Candidatus_Nitrosopumilus;uncultured_archaeon	KP204650.1.1397	99.522	0
UNI2370	1	2	6	0	13	1	0	2	0	0	0	4	0	0	0	0	5	1	Archaea;Thaumarchaeota;Nitrososphaeria;Nitrosopumilales;Nitrosopumilaceae;Candidatus_Nitrosopumilus;uncultured_archaeon	AY856365.1.1440	99.282	0
UNI264	1	0	0	0	3	16	1	5	71	0	0	0	0	0	1	0	0	31	Archaea;Thaumarchaeota;Nitrososphaeria;Nitrosopumilales;Nitrosopumilaceae;Candidatus_Nitrosopumilus;uncultured_archaeon	FJ571707.1.1346	100	0
UNI1336	1	0	0	0	0	21	0	0	16	0	0	0	0	0	0	0	0	4	Archaea;Thaumarchaeota;Nitrososphaeria;Nitrosopumilales;Nitrosopumilaceae;Candidatus_Nitrosopumilus;uncultured_archaeon	KP204647.1.1397	99.761	0
UNI173	1	3	21	0	39	29	18	46	14	0	0	7	2	0	0	4	52	13	Archaea;Thaumarchaeota;Nitrososphaeria;Nitrosopumilales;Nitrosopumilaceae;Candidatus_Nitrosopumilus;uncultured_archaeon	KY563092.1.1397	100	0
UNI195	4	23	6	0	89	29	14	7	0	0	0	6	0	0	8	7	3	0	Archaea;Thaumarchaeota;Nitrososphaeria;Nitrosopumilales;Nitrosopumilaceae;Candidatus_Nitrosopumilus;uncultured_archaeon	KY563092.1.1397	99.282	0
UNI844	1	0	11	0	0	0	9	18	0	0	0	5	0	0	0	7	15	0	Archaea;Thaumarchaeota;Nitrososphaeria;Nitrosopumilales;Nitrosopumilaceae;Candidatus_Nitrosopumilus;uncultured_archaeon	KP204643.1.1397	98.804	0
UNI1940	1	4	3	0	1	2	0	4	22	0	0	1	0	0	0	1	0	6	Archaea;Thaumarchaeota;Nitrososphaeria;Nitrosopumilales;Nitrosopumilaceae;Candidatus_Nitrosopumilus;uncultured_archaeon	KP204643.1.1397	99.522	0
UNI1042	1	7	0	0	11	16	0	0	16	0	0	1	0	0	0	0	0	12	Archaea;Thaumarchaeota;Nitrososphaeria;Nitrosopumilales;Nitrosopumilaceae;Candidatus_Nitrosopumilus;uncultured_archaeon	KP204685.1.1397	99.761	0
UNI552	1	17	1	0	30	18	6	3	0	0	0	1	0	0	2	1	1	0	Archaea;Thaumarchaeota;Nitrososphaeria;Nitrosopumilales;Nitrosopumilaceae;Candidatus_Nitrosopumilus;uncultured_archaeon	KY563092.1.1397	99.282	0
UNI2805	1	0	4	1	1	2	9	0	18	0	0	0	0	0	0	0	0	0	Archaea;Thaumarchaeota;Nitrososphaeria;Nitrosopumilales;Nitrosopumilaceae;Candidatus_Nitrosopumilus;uncultured_archaeon	FJ571750.1.1346	98.804	0
UNI333	0	8	34	16	0	0	17	10	0	0	0	5	10	0	0	5	9	0	Archaea;Thaumarchaeota;Nitrososphaeria;Nitrosopumilales;Nitrosopumilaceae;Candidatus_Nitrosopumilus;uncultured_archaeon	LC080984.1.1440	100	0
UNI2017	0	9	1	0	2	1	2	7	15	0	0	2	0	0	0	2	7	1	Archaea;Thaumarchaeota;Nitrososphaeria;Nitrosopumilales;Nitrosopumilaceae;Candidatus_Nitrosopumilus;uncultured_archaeon	KP204686.1.1397	99.761	0
UNI1986	0	7	1	0	10	3	2	2	5	0	0	2	0	0	0	0	4	0	Archaea;Thaumarchaeota;Nitrososphaeria;Nitrosopumilales;Nitrosopumilaceae;Candidatus_Nitrosopumilus;uncultured_archaeon	AY856365.1.1440	99.761	0
UNI371	0	7	0	0	2	10	0	0	75	0	0	0	0	0	0	0	0	34	Archaea;Thaumarchaeota;Nitrososphaeria;Nitrosopumilales;Nitrosopumilaceae;Candidatus_Nitrosopumilus;uncultured_archaeon	KP204641.1.1398	99.523	0
UNI1357	0	9	2	0	2	4	4	5	11	0	0	2	0	0	0	1	7	5	Archaea;Thaumarchaeota;Nitrososphaeria;Nitrosopumilales;Nitrosopumilaceae;Candidatus_Nitrosopumilus;uncultured_archaeon	KP204686.1.1397	99.761	0
UNI562	0	7	10	5	4	0	33	7	1	0	0	4	1	0	0	16	11	2	Archaea;Thaumarchaeota;Nitrososphaeria;Nitrosopumilales;Nitrosopumilaceae;Candidatus_Nitrosopumilus;uncultured_archaeon	KM454184.1.914	99.761	0
UNI1118	0	8	6	0	14	4	13	15	7	0	0	6	4	0	0	7	6	13	Archaea;Thaumarchaeota;Nitrososphaeria;Nitrosopumilales;Nitrosopumilaceae;Candidatus_Nitrosopumilus;uncultured_archaeon	GU207312.1.915	99.282	0
UNI316	0	1	1	0	0	17	3	10	97	0	0	0	0	0	3	0	1	35	Archaea;Thaumarchaeota;Nitrososphaeria;Nitrosopumilales;Nitrosopumilaceae;Candidatus_Nitrosopumilus;uncultured_archaeon	FJ571707.1.1346	99.522	0
UNI2543	0	6	2	0	3	0	2	7	5	0	0	0	0	0	0	5	0	4	Archaea;Thaumarchaeota;Nitrososphaeria;Nitrosopumilales;Nitrosopumilaceae;Candidatus_Nitrosopumilus;uncultured_archaeon	GU207312.1.915	99.522	0
UNI246	0	9	18	0	48	43	18	13	0	0	0	7	0	0	0	7	3	0	Archaea;Thaumarchaeota;Nitrososphaeria;Nitrosopumilales;Nitrosopumilaceae;Candidatus_Nitrosopumilus;uncultured_archaeon	LC139912.1.900	99.76	0
UNI1100	0	5	0	0	16	9	0	0	14	0	0	0	0	0	0	0	1	9	Archaea;Thaumarchaeota;Nitrososphaeria;Nitrosopumilales;Nitrosopumilaceae;Candidatus_Nitrosopumilus;uncultured_archaeon	KP204685.1.1397	99.761	0
UNI3394	0	1	0	0	0	0	2	2	7	0	0	0	0	0	0	3	1	4	Archaea;Thaumarchaeota;Nitrososphaeria;Nitrosopumilales;Nitrosopumilaceae;Candidatus_Nitrosopumilus;uncultured_archaeon	KP204686.1.1397	99.522	0
UNI1586	0	3	0	0	11	8	1	0	11	0	0	0	0	0	0	0	1	1	Archaea;Thaumarchaeota;Nitrososphaeria;Nitrosopumilales;Nitrosopumilaceae;Candidatus_Nitrosopumilus;uncultured_archaeon	KP204685.1.1397	100	0
UNI349	0	10	3	0	58	19	3	1	0	0	0	1	0	0	3	1	2	2	Archaea;Thaumarchaeota;Nitrososphaeria;Nitrosopumilales;Nitrosopumilaceae;Candidatus_Nitrosopumilus;uncultured_archaeon	KY563092.1.1397	99.522	0
UNI226	0	3	26	6	4	1	58	9	3	0	0	21	2	0	0	56	14	2	Archaea;Thaumarchaeota;Nitrososphaeria;Nitrosopumilales;Nitrosopumilaceae;Candidatus_Nitrosopumilus;uncultured_archaeon	KM454184.1.914	99.522	0
UNI3245	0	2	2	1	0	0	0	1	4	0	0	2	1	0	0	0	3	0	Archaea;Thaumarchaeota;Nitrososphaeria;Nitrosopumilales;Nitrosopumilaceae;Candidatus_Nitrosopumilus;uncultured_archaeon	KP204643.1.1397	99.522	0
UNI1019	0	20	16	3	9	5	10	20	3	0	0	9	3	0	0	4	3	2	Archaea;Thaumarchaeota;Nitrososphaeria;Nitrosopumilales;Nitrosopumilaceae;Candidatus_Nitrosopumilus;uncultured_archaeon	AY856365.1.1440	99.522	0
UNI713	0	6	2	0	14	14	0	3	21	0	0	0	0	0	0	2	0	12	Archaea;Thaumarchaeota;Nitrososphaeria;Nitrosopumilales;Nitrosopumilaceae;Candidatus_Nitrosopumilus;uncultured_archaeon	KP204685.1.1397	99.522	0
UNI157	0	11	22	1	37	44	21	66	22	0	0	16	2	0	0	14	48	13	Archaea;Thaumarchaeota;Nitrososphaeria;Nitrosopumilales;Nitrosopumilaceae;Candidatus_Nitrosopumilus;uncultured_archaeon	KY563092.1.1397	99.761	0
UNI1395	0	13	1	0	2	3	2	7	8	0	0	3	0	0	0	2	4	4	Archaea;Thaumarchaeota;Nitrososphaeria;Nitrosopumilales;Nitrosopumilaceae;Candidatus_Nitrosopumilus;uncultured_archaeon	KP204686.1.1397	99.522	0
UNI261	0	5	13	0	29	24	22	55	16	0	0	5	1	0	0	3	27	11	Archaea;Thaumarchaeota;Nitrososphaeria;Nitrosopumilales;Nitrosopumilaceae;Candidatus_Nitrosopumilus;uncultured_archaeon	KY563092.1.1397	99.522	0
UNI2608	0	6	0	0	10	0	0	0	1	0	0	0	0	0	0	0	0	0	Archaea;Thaumarchaeota;Nitrososphaeria;Nitrosopumilales;Nitrosopumilaceae;Candidatus_Nitrosopumilus;uncultured_archaeon	KP204686.1.1397	99.282	0
UNI1612	0	4	3	0	3	8	3	2	5	0	0	1	0	0	0	1	1	0	Archaea;Thaumarchaeota;Nitrososphaeria;Nitrosopumilales;Nitrosopumilaceae;Candidatus_Nitrosopumilus;uncultured_archaeon	KP204650.1.1397	99.043	0
UNI1021	0	5	16	9	0	1	10	9	0	0	0	1	4	0	0	2	1	0	Archaea;Thaumarchaeota;Nitrososphaeria;Nitrosopumilales;Nitrosopumilaceae;Candidatus_Nitrosopumilus;uncultured_archaeon	LC080984.1.1440	99.761	0
UNI879	0	1	1	0	0	2	0	2	52	0	1	0	0	0	0	1	0	28	Archaea;Thaumarchaeota;Nitrososphaeria;Nitrosopumilales;Nitrosopumilaceae;Candidatus_Nitrosopumilus;uncultured_archaeon	KP204672.1.1397	99.761	0
UNI283	0	3	0	0	3	15	0	0	78	0	0	0	0	0	0	0	1	50	Archaea;Thaumarchaeota;Nitrososphaeria;Nitrosopumilales;Nitrosopumilaceae;Candidatus_Nitrosopumilus;uncultured_archaeon	KP204641.1.1398	99.284	0
UNI379	0	1	0	0	2	13	1	3	56	0	0	0	0	0	0	0	1	73	Archaea;Thaumarchaeota;Nitrososphaeria;Nitrosopumilales;Nitrosopumilaceae;Candidatus_Nitrosopumilus;uncultured_archaeon	HM998404.1.912	99.522	0
UNI655	0	3	5	0	3	21	2	2	32	0	0	0	0	0	0	4	8	23	Archaea;Thaumarchaeota;Nitrososphaeria;Nitrosopumilales;Nitrosopumilaceae;Candidatus_Nitrosopumilus;uncultured_archaeon	KP204643.1.1397	99.522	0
UNI2274	0	4	11	0	0	0	6	0	0	0	0	3	0	0	0	1	6	0	Archaea;Thaumarchaeota;Nitrososphaeria;Nitrosopumilales;Nitrosopumilaceae;Candidatus_Nitrosopumilus;uncultured_archaeon	FJ571941.1.1346	99.282	0
UNI2769	0	3	4	0	3	1	3	1	3	0	0	0	0	0	0	0	1	1	Archaea;Thaumarchaeota;Nitrososphaeria;Nitrosopumilales;Nitrosopumilaceae;Candidatus_Nitrosopumilus;uncultured_archaeon	KP204650.1.1397	99.282	0
UNI558	0	12	16	4	15	4	7	18	6	0	0	6	9	0	0	6	4	1	Archaea;Thaumarchaeota;Nitrososphaeria;Nitrosopumilales;Nitrosopumilaceae;Candidatus_Nitrosopumilus;uncultured_archaeon	LC139814.1.900	99.281	0
UNI756	0	1	19	0	0	4	22	119	48	0	0	3	0	0	0	9	15	22	Archaea;Thaumarchaeota;Nitrososphaeria;Nitrosopumilales;Nitrosopumilaceae;Candidatus_Nitrosopumilus;uncultured_archaeon	GU207312.1.915	99.043	0
UNI2633	0	6	3	0	1	4	2	3	6	0	0	0	0	0	0	0	4	1	Archaea;Thaumarchaeota;Nitrososphaeria;Nitrosopumilales;Nitrosopumilaceae;Candidatus_Nitrosopumilus;uncultured_archaeon	KP204686.1.1397	100	0
UNI474	0	1	14	2	0	5	27	11	9	0	0	2	1	0	0	13	22	14	Archaea;Thaumarchaeota;Nitrososphaeria;Nitrosopumilales;Nitrosopumilaceae;Candidatus_Nitrosopumilus;uncultured_archaeon	KP204643.1.1397	99.043	0
UNI741	0	5	0	0	1	9	0	0	44	0	0	0	0	0	0	0	0	20	Archaea;Thaumarchaeota;Nitrososphaeria;Nitrosopumilales;Nitrosopumilaceae;Candidatus_Nitrosopumilus;uncultured_archaeon	KP204641.1.1398	99.761	0
UNI595	0	6	5	0	27	22	2	2	0	0	0	6	1	0	0	0	0	0	Archaea;Thaumarchaeota;Nitrososphaeria;Nitrosopumilales;Nitrosopumilaceae;Candidatus_Nitrosopumilus;uncultured_archaeon	KY563092.1.1397	99.522	0
UNI132	0	9	27	2	63	75	43	26	0	0	0	14	0	0	0	15	11	0	Archaea;Thaumarchaeota;Nitrososphaeria;Nitrosopumilales;Nitrosopumilaceae;Candidatus_Nitrosopumilus;uncultured_archaeon	LC139912.1.900	99.76	0
UNI2019	0	4	4	0	0	3	2	3	3	0	0	7	0	0	0	12	1	0	Archaea;Thaumarchaeota;Nitrososphaeria;Nitrosopumilales;Nitrosopumilaceae;Candidatus_Nitrosopumilus;uncultured_archaeon	KP204672.1.1397	99.522	0
UNI2227	0	3	26	0	4	0	4	26	13	0	0	4	0	0	0	3	1	6	Archaea;Thaumarchaeota;Nitrososphaeria;Nitrosopumilales;Nitrosopumilaceae;Candidatus_Nitrosopumilus;uncultured_archaeon	KP204650.1.1397	99.761	0
UNI902	0	1	7	0	5	15	1	3	40	0	0	1	0	0	0	2	6	14	Archaea;Thaumarchaeota;Nitrososphaeria;Nitrosopumilales;Nitrosopumilaceae;Candidatus_Nitrosopumilus;uncultured_archaeon	KP204643.1.1397	100	0
UNI615	0	3	6	0	23	16	22	24	4	0	0	1	0	0	0	1	10	2	Archaea;Thaumarchaeota;Nitrososphaeria;Nitrosopumilales;Nitrosopumilaceae;Candidatus_Nitrosopumilus;uncultured_archaeon	KY563092.1.1397	99.761	0
UNI1131	0	1	8	0	1	0	16	7	10	0	0	3	2	0	0	4	11	5	Archaea;Thaumarchaeota;Nitrososphaeria;Nitrosopumilales;Nitrosopumilaceae;Candidatus_Nitrosopumilus;uncultured_archaeon	KP204643.1.1397	99.282	0
UNI3064	0	1	0	8	0	0	0	0	0	0	0	0	5	0	0	0	0	0	Archaea;Thaumarchaeota;Nitrososphaeria;Nitrosopumilales;Nitrosopumilaceae;Candidatus_Nitrosopumilus;uncultured_archaeon	KP204635.1.1397	98.804	0
UNI362	0	2	8	0	0	0	15	21	5	0	0	9	0	0	0	29	29	2	Archaea;Thaumarchaeota;Nitrososphaeria;Nitrosopumilales;Nitrosopumilaceae;Candidatus_Nitrosopumilus;uncultured_archaeon	FJ571882.1.1346	99.043	0
UNI465	0	5	11	0	23	29	15	2	0	0	0	1	0	0	0	3	3	0	Archaea;Thaumarchaeota;Nitrososphaeria;Nitrosopumilales;Nitrosopumilaceae;Candidatus_Nitrosopumilus;uncultured_archaeon	LC139912.1.900	100	0
UNI500	0	2	9	0	0	0	2	12	45	0	0	1	0	0	0	3	1	65	Archaea;Thaumarchaeota;Nitrososphaeria;Nitrosopumilales;Nitrosopumilaceae;Candidatus_Nitrosopumilus;uncultured_archaeon	FJ571707.1.1346	99.282	0
UNI1184	0	1	7	1	0	0	3	10	2	0	0	7	0	0	0	21	18	1	Archaea;Thaumarchaeota;Nitrososphaeria;Nitrosopumilales;Nitrosopumilaceae;Candidatus_Nitrosopumilus;uncultured_archaeon	KP204686.1.1397	99.282	0
UNI1515	0	2	3	0	12	6	0	1	0	0	0	1	0	0	0	0	2	0	Archaea;Thaumarchaeota;Nitrososphaeria;Nitrosopumilales;Nitrosopumilaceae;Candidatus_Nitrosopumilus;uncultured_archaeon	KY563092.1.1397	99.761	0
UNI919	0	1	15	0	1	2	4	4	2	0	0	5	0	0	0	7	25	0	Archaea;Thaumarchaeota;Nitrososphaeria;Nitrosopumilales;Nitrosopumilaceae;Candidatus_Nitrosopumilus;uncultured_archaeon	FJ571941.1.1346	99.043	0
UNI1368	0	2	1	0	1	5	13	25	0	0	0	2	0	0	0	0	9	0	Archaea;Thaumarchaeota;Nitrososphaeria;Nitrosopumilales;Nitrosopumilaceae;Candidatus_Nitrosopumilus;uncultured_archaeon	KP204689.1.1397	99.282	0
UNI633	0	2	1	0	0	2	21	47	0	0	0	0	0	0	0	9	27	0	Archaea;Thaumarchaeota;Nitrososphaeria;Nitrosopumilales;Nitrosopumilaceae;Candidatus_Nitrosopumilus;uncultured_archaeon	KP204689.1.1397	99.522	0
UNI659	0	2	6	0	0	1	13	14	0	0	0	2	1	0	0	32	37	1	Archaea;Thaumarchaeota;Nitrososphaeria;Nitrosopumilales;Nitrosopumilaceae;Candidatus_Nitrosopumilus;uncultured_archaeon	KP204686.1.1397	99.043	0
UNI322	0	4	1	0	0	0	0	6	98	0	0	0	0	0	0	1	1	63	Archaea;Thaumarchaeota;Nitrososphaeria;Nitrosopumilales;Nitrosopumilaceae;Candidatus_Nitrosopumilus;uncultured_archaeon	KP204672.1.1397	100	0
UNI1404	0	1	4	0	0	10	11	26	4	0	0	0	0	0	0	5	13	1	Archaea;Thaumarchaeota;Nitrososphaeria;Nitrosopumilales;Nitrosopumilaceae;Candidatus_Nitrosopumilus;uncultured_archaeon	KP204689.1.1397	99.761	0
UNI1141	0	5	1	1	4	12	2	5	11	0	0	0	0	0	0	1	3	3	Archaea;Thaumarchaeota;Nitrososphaeria;Nitrosopumilales;Nitrosopumilaceae;Candidatus_Nitrosopumilus;uncultured_archaeon	KP204650.1.1397	99.282	0
UNI2914	0	3	2	0	7	2	0	1	1	0	0	0	0	0	0	0	1	0	Archaea;Thaumarchaeota;Nitrososphaeria;Nitrosopumilales;Nitrosopumilaceae;Candidatus_Nitrosopumilus;uncultured_archaeon	AY856365.1.1440	99.522	0
UNI2672	0	1	2	0	0	4	0	4	19	0	0	1	0	0	0	0	0	5	Archaea;Thaumarchaeota;Nitrososphaeria;Nitrosopumilales;Nitrosopumilaceae;Candidatus_Nitrosopumilus;uncultured_archaeon	KP204643.1.1397	99.761	0
UNI1919	0	1	1	0	0	0	5	7	0	0	0	2	0	0	0	1	6	1	Archaea;Thaumarchaeota;Nitrososphaeria;Nitrosopumilales;Nitrosopumilaceae;Candidatus_Nitrosopumilus;uncultured_archaeon	KM454184.1.914	99.522	0
UNI1097	0	1	0	1	1	5	0	0	29	0	0	0	0	0	0	0	0	24	Archaea;Thaumarchaeota;Nitrososphaeria;Nitrosopumilales;Nitrosopumilaceae;Candidatus_Nitrosopumilus;uncultured_archaeon	KP204672.1.1397	99.522	0
UNI871	0	2	10	0	0	12	6	5	1	0	0	10	0	0	0	0	18	1	Archaea;Thaumarchaeota;Nitrososphaeria;Nitrosopumilales;Nitrosopumilaceae;Candidatus_Nitrosopumilus;uncultured_archaeon	KP204643.1.1397	99.282	0
UNI522	0	1	3	0	0	8	18	36	0	0	0	1	0	0	0	10	31	0	Archaea;Thaumarchaeota;Nitrososphaeria;Nitrosopumilales;Nitrosopumilaceae;Candidatus_Nitrosopumilus;uncultured_archaeon	KP204689.1.1397	99.282	0
UNI1010	0	2	5	0	0	13	2	5	26	0	0	1	0	0	0	2	3	8	Archaea;Thaumarchaeota;Nitrososphaeria;Nitrosopumilales;Nitrosopumilaceae;Candidatus_Nitrosopumilus;uncultured_archaeon	KP204643.1.1397	99.761	0
UNI950	0	1	0	0	2	3	0	2	31	0	0	1	0	0	0	0	0	24	Archaea;Thaumarchaeota;Nitrososphaeria;Nitrosopumilales;Nitrosopumilaceae;Candidatus_Nitrosopumilus;uncultured_archaeon	KP204672.1.1397	99.761	0
UNI115	0	1	3	0	0	3	0	5	169	0	1	0	0	0	0	3	2	181	Archaea;Thaumarchaeota;Nitrososphaeria;Nitrosopumilales;Nitrosopumilaceae;Candidatus_Nitrosopumilus;uncultured_archaeon	KP204672.1.1397	99.761	0
UNI1807	0	1	0	0	2	4	0	0	23	0	0	0	0	0	0	0	0	3	Archaea;Thaumarchaeota;Nitrososphaeria;Nitrosopumilales;Nitrosopumilaceae;Candidatus_Nitrosopumilus;uncultured_archaeon	KP204641.1.1398	99.523	0
UNI811	0	1	0	0	1	5	0	0	44	0	0	0	0	0	0	0	0	21	Archaea;Thaumarchaeota;Nitrososphaeria;Nitrosopumilales;Nitrosopumilaceae;Candidatus_Nitrosopumilus;uncultured_archaeon	KP204641.1.1398	99.523	0
UNI1895	0	5	2	0	0	1	1	3	2	0	0	10	0	0	0	12	7	0	Archaea;Thaumarchaeota;Nitrososphaeria;Nitrosopumilales;Nitrosopumilaceae;Candidatus_Nitrosopumilus;uncultured_archaeon	KP204672.1.1397	99.282	0
UNI2957	0	1	4	0	0	1	3	0	0	0	0	3	0	0	0	1	3	1	Archaea;Thaumarchaeota;Nitrososphaeria;Nitrosopumilales;Nitrosopumilaceae;Candidatus_Nitrosopumilus;uncultured_archaeon	KP204643.1.1397	99.522	0
UNI1029	0	1	4	0	0	0	7	5	1	0	0	3	0	0	0	6	20	0	Archaea;Thaumarchaeota;Nitrososphaeria;Nitrosopumilales;Nitrosopumilaceae;Candidatus_Nitrosopumilus;uncultured_archaeon	FJ571882.1.1346	99.282	0
UNI2328	0	2	4	0	0	0	2	5	1	0	0	2	0	0	0	8	6	0	Archaea;Thaumarchaeota;Nitrososphaeria;Nitrosopumilales;Nitrosopumilaceae;Candidatus_Nitrosopumilus;uncultured_archaeon	KP204686.1.1397	99.522	0
UNI1005	0	2	5	0	0	0	8	7	2	0	0	5	0	0	0	10	14	0	Archaea;Thaumarchaeota;Nitrososphaeria;Nitrosopumilales;Nitrosopumilaceae;Candidatus_Nitrosopumilus;uncultured_archaeon	FJ571882.1.1346	99.522	0
UNI3158	0	1	2	0	0	1	4	5	6	0	0	0	0	0	0	0	1	2	Archaea;Thaumarchaeota;Nitrososphaeria;Nitrosopumilales;Nitrosopumilaceae;Candidatus_Nitrosopumilus;uncultured_archaeon	KP204686.1.1397	99.522	0
UNI1777	0	2	3	0	0	0	2	2	5	0	0	5	0	0	0	1	4	6	Archaea;Thaumarchaeota;Nitrososphaeria;Nitrosopumilales;Nitrosopumilaceae;Candidatus_Nitrosopumilus;uncultured_archaeon	KP204643.1.1397	99.282	0
UNI270	0	1	26	5	2	0	36	12	4	0	0	19	0	0	0	39	12	4	Archaea;Thaumarchaeota;Nitrososphaeria;Nitrosopumilales;Nitrosopumilaceae;Candidatus_Nitrosopumilus;uncultured_archaeon	KM454184.1.914	99.761	0
UNI1801	0	1	0	0	2	1	0	5	5	0	0	0	0	0	0	5	5	10	Archaea;Thaumarchaeota;Nitrososphaeria;Nitrosopumilales;Nitrosopumilaceae;Candidatus_Nitrosopumilus;uncultured_archaeon	FJ981020.1.900	99.522	0
UNI2121	0	0	8	0	0	5	3	19	94	0	0	0	0	0	0	3	1	40	Archaea;Thaumarchaeota;Nitrososphaeria;Nitrosopumilales;Nitrosopumilaceae;Candidatus_Nitrosopumilus;uncultured_archaeon	FJ571939.1.1346	99.282	0
UNI2424	0	0	11	1	0	5	7	11	53	0	0	0	0	0	0	4	3	20	Archaea;Thaumarchaeota;Nitrososphaeria;Nitrosopumilales;Nitrosopumilaceae;Candidatus_Nitrosopumilus;uncultured_archaeon	FJ571750.1.1346	99.522	0
UNI921	0	0	4	0	10	13	8	6	3	0	0	3	0	0	0	6	5	3	Archaea;Thaumarchaeota;Nitrososphaeria;Nitrosopumilales;Nitrosopumilaceae;Candidatus_Nitrosopumilus;uncultured_archaeon	FJ571882.1.1346	99.761	0
UNI649	0	0	17	0	1	1	30	102	57	0	0	3	0	0	0	10	15	36	Archaea;Thaumarchaeota;Nitrososphaeria;Nitrosopumilales;Nitrosopumilaceae;Candidatus_Nitrosopumilus;uncultured_archaeon	GU207312.1.915	98.804	0
UNI731	0	0	13	1	0	4	11	17	7	0	0	5	2	0	0	11	18	8	Archaea;Thaumarchaeota;Nitrososphaeria;Nitrosopumilales;Nitrosopumilaceae;Candidatus_Nitrosopumilus;uncultured_archaeon	KP204643.1.1397	99.282	0
UNI2005	0	0	5	0	0	0	12	2	2	0	0	2	0	0	0	11	3	0	Archaea;Thaumarchaeota;Nitrososphaeria;Nitrosopumilales;Nitrosopumilaceae;Candidatus_Nitrosopumilus;uncultured_archaeon	LC080933.1.1440	99.761	0
UNI1494	0	0	3	0	0	0	16	7	0	0	0	0	0	0	0	5	5	0	Archaea;Thaumarchaeota;Nitrososphaeria;Nitrosopumilales;Nitrosopumilaceae;Candidatus_Nitrosopumilus;uncultured_archaeon	FJ571882.1.1346	99.043	0
UNI999	0	0	5	0	0	0	4	12	0	0	0	10	0	0	0	4	20	0	Archaea;Thaumarchaeota;Nitrososphaeria;Nitrosopumilales;Nitrosopumilaceae;Candidatus_Nitrosopumilus;uncultured_archaeon	LC139814.1.900	99.041	0
UNI1604	0	0	7	0	0	0	6	11	7	0	0	4	0	0	0	4	10	3	Archaea;Thaumarchaeota;Nitrososphaeria;Nitrosopumilales;Nitrosopumilaceae;Candidatus_Nitrosopumilus;uncultured_archaeon	KP204643.1.1397	99.522	0
UNI267	0	0	25	2	0	0	22	25	0	0	0	18	1	0	0	22	27	0	Archaea;Thaumarchaeota;Nitrososphaeria;Nitrosopumilales;Nitrosopumilaceae;Candidatus_Nitrosopumilus;uncultured_archaeon	KP204643.1.1397	99.043	0
UNI3235	0	0	4	0	0	0	3	7	7	0	0	0	0	0	0	2	3	8	Archaea;Thaumarchaeota;Nitrososphaeria;Nitrosopumilales;Nitrosopumilaceae;Candidatus_Nitrosopumilus;uncultured_archaeon	FJ571707.1.1346	99.282	0
UNI1528	0	0	6	0	0	0	8	6	2	0	0	0	0	0	0	8	6	0	Archaea;Thaumarchaeota;Nitrososphaeria;Nitrosopumilales;Nitrosopumilaceae;Candidatus_Nitrosopumilus;uncultured_archaeon	FJ571941.1.1346	98.804	0
UNI1859	0	0	1	0	0	0	0	1	26	0	0	0	0	0	0	0	0	11	Archaea;Thaumarchaeota;Nitrososphaeria;Nitrosopumilales;Nitrosopumilaceae;Candidatus_Nitrosopumilus;uncultured_archaeon	KP204699.1.1397	99.522	0
UNI1545	0	0	2	0	3	11	0	5	28	0	0	0	0	0	0	0	1	6	Archaea;Thaumarchaeota;Nitrososphaeria;Nitrosopumilales;Nitrosopumilaceae;Candidatus_Nitrosopumilus;uncultured_archaeon	KP204643.1.1397	99.522	0
UNI1686	0	0	22	1	0	2	18	83	25	0	0	1	0	0	0	4	3	13	Archaea;Thaumarchaeota;Nitrososphaeria;Nitrosopumilales;Nitrosopumilaceae;Candidatus_Nitrosopumilus;uncultured_archaeon	GU207312.1.915	99.043	0
UNI1519	0	0	8	0	0	0	11	2	0	0	0	1	0	0	0	7	6	0	Archaea;Thaumarchaeota;Nitrososphaeria;Nitrosopumilales;Nitrosopumilaceae;Candidatus_Nitrosopumilus;uncultured_archaeon	FJ571941.1.1346	99.043	0
UNI2103	0	0	26	0	1	2	3	27	4	0	0	2	0	0	0	5	4	4	Archaea;Thaumarchaeota;Nitrososphaeria;Nitrosopumilales;Nitrosopumilaceae;Candidatus_Nitrosopumilus;uncultured_archaeon	GU207312.1.915	99.043	0
UNI2416	0	0	3	0	0	0	1	9	23	0	0	0	0	0	0	1	2	12	Archaea;Thaumarchaeota;Nitrososphaeria;Nitrosopumilales;Nitrosopumilaceae;Candidatus_Nitrosopumilus;uncultured_archaeon	KP204695.1.1397	99.282	0
UNI2195	0	0	6	0	0	0	0	1	2	0	0	15	3	0	0	1	2	5	Archaea;Thaumarchaeota;Nitrososphaeria;Nitrosopumilales;Nitrosopumilaceae;Candidatus_Nitrosopumilus;uncultured_archaeon	KP204686.1.1397	99.043	0
UNI746	0	0	1	0	0	6	2	3	25	0	0	0	0	0	0	0	0	38	Archaea;Thaumarchaeota;Nitrososphaeria;Nitrosopumilales;Nitrosopumilaceae;Candidatus_Nitrosopumilus;uncultured_archaeon	FJ981020.1.900	99.282	0
UNI1358	0	0	15	0	0	1	16	11	1	0	0	2	0	0	0	4	6	1	Archaea;Thaumarchaeota;Nitrososphaeria;Nitrosopumilales;Nitrosopumilaceae;Candidatus_Nitrosopumilus;uncultured_archaeon	KP204643.1.1397	99.043	0
UNI217	0	0	1	0	0	0	23	29	2	0	0	1	0	0	0	30	66	0	Archaea;Thaumarchaeota;Nitrososphaeria;Nitrosopumilales;Nitrosopumilaceae;Candidatus_Nitrosopumilus;uncultured_archaeon	KP204689.1.1397	99.043	0
UNI3077	0	0	5	0	0	4	6	2	9	0	0	0	0	0	0	0	0	0	Archaea;Thaumarchaeota;Nitrososphaeria;Nitrosopumilales;Nitrosopumilaceae;Candidatus_Nitrosopumilus;uncultured_archaeon	FJ571750.1.1346	98.325	0
UNI915	0	0	4	0	0	0	6	18	0	0	0	0	0	3	0	5	23	0	Archaea;Thaumarchaeota;Nitrososphaeria;Nitrosopumilales;Nitrosopumilaceae;Candidatus_Nitrosopumilus;uncultured_archaeon	KY563092.1.1397	99.522	0
UNI681	0	0	14	0	0	0	8	9	1	0	0	5	0	0	0	18	26	1	Archaea;Thaumarchaeota;Nitrososphaeria;Nitrosopumilales;Nitrosopumilaceae;Candidatus_Nitrosopumilus;uncultured_archaeon	FJ571941.1.1346	98.804	0
UNI1752	0	0	4	3	1	9	12	7	16	0	0	0	0	0	0	0	0	0	Archaea;Thaumarchaeota;Nitrososphaeria;Nitrosopumilales;Nitrosopumilaceae;Candidatus_Nitrosopumilus;uncultured_archaeon	FJ571750.1.1346	98.565	0
UNI113	0	0	2	0	0	2	2	4	182	0	1	0	0	0	0	4	6	185	Archaea;Thaumarchaeota;Nitrososphaeria;Nitrosopumilales;Nitrosopumilaceae;Candidatus_Nitrosopumilus;uncultured_archaeon	KP204672.1.1397	99.522	0
UNI748	0	0	8	0	0	0	10	4	2	0	0	8	0	0	0	27	5	4	Archaea;Thaumarchaeota;Nitrososphaeria;Nitrosopumilales;Nitrosopumilaceae;Candidatus_Nitrosopumilus;uncultured_archaeon	LC080933.1.1440	99.522	0
UNI1271	0	0	3	0	0	2	11	22	1	0	0	0	0	0	0	3	15	0	Archaea;Thaumarchaeota;Nitrososphaeria;Nitrosopumilales;Nitrosopumilaceae;Candidatus_Nitrosopumilus;uncultured_archaeon	KP204689.1.1397	99.522	0
UNI203	0	0	1	0	0	0	45	42	0	0	0	0	0	0	0	56	55	0	Archaea;Thaumarchaeota;Nitrososphaeria;Nitrosopumilales;Nitrosopumilaceae;Candidatus_Nitrosopumilus;uncultured_archaeon	KP204689.1.1397	99.282	0
UNI529	0	0	7	0	0	0	17	11	0	0	0	11	0	0	0	15	16	1	Archaea;Thaumarchaeota;Nitrososphaeria;Nitrosopumilales;Nitrosopumilaceae;Candidatus_Nitrosopumilus;uncultured_archaeon	FJ571882.1.1346	99.282	0
UNI710	0	0	2	0	1	15	2	7	44	0	0	0	0	0	0	2	1	40	Archaea;Thaumarchaeota;Nitrososphaeria;Nitrosopumilales;Nitrosopumilaceae;Candidatus_Nitrosopumilus;uncultured_archaeon	HM998404.1.912	99.522	0
UNI2538	0	0	5	0	0	0	7	2	4	0	0	2	0	0	0	6	4	1	Archaea;Thaumarchaeota;Nitrososphaeria;Nitrosopumilales;Nitrosopumilaceae;Candidatus_Nitrosopumilus;uncultured_archaeon	LC080933.1.1440	99.522	0
UNI54	0	0	3	0	0	0	81	81	0	0	0	2	0	0	0	137	167	0	Archaea;Thaumarchaeota;Nitrososphaeria;Nitrosopumilales;Nitrosopumilaceae;Candidatus_Nitrosopumilus;uncultured_archaeon	KP204689.1.1397	99.043	0
UNI872	0	0	4	0	0	0	14	13	1	0	0	5	0	0	0	10	13	2	Archaea;Thaumarchaeota;Nitrososphaeria;Nitrosopumilales;Nitrosopumilaceae;Candidatus_Nitrosopumilus;uncultured_archaeon	FJ571941.1.1346	99.043	0
UNI2398	0	0	2	0	2	0	12	3	2	0	0	0	1	0	0	4	1	0	Archaea;Thaumarchaeota;Nitrososphaeria;Nitrosopumilales;Nitrosopumilaceae;Candidatus_Nitrosopumilus;uncultured_archaeon	KM454184.1.914	99.761	0
UNI1287	0	0	2	0	0	0	6	7	0	0	0	4	0	0	0	6	12	0	Archaea;Thaumarchaeota;Nitrososphaeria;Nitrosopumilales;Nitrosopumilaceae;Candidatus_Nitrosopumilus;uncultured_archaeon	FJ571901.1.1346	99.043	0
UNI1780	0	0	3	0	0	0	3	6	2	0	0	0	1	0	0	6	5	0	Archaea;Thaumarchaeota;Nitrososphaeria;Nitrosopumilales;Nitrosopumilaceae;Candidatus_Nitrosopumilus;uncultured_archaeon	KP204643.1.1397	99.043	0
UNI2859	0	0	1	0	0	0	1	8	9	0	0	3	0	0	0	2	6	15	Archaea;Thaumarchaeota;Nitrososphaeria;Nitrosopumilales;Nitrosopumilaceae;Candidatus_Nitrosopumilus;uncultured_archaeon	LC139814.1.900	98.801	0
UNI274	0	0	7	0	22	34	6	28	4	0	0	7	0	0	0	26	28	0	Archaea;Thaumarchaeota;Nitrososphaeria;Nitrosopumilales;Nitrosopumilaceae;Candidatus_Nitrosopumilus;uncultured_archaeon	FJ571882.1.1346	99.282	0
UNI2213	0	0	10	0	0	1	6	50	63	0	0	1	0	0	0	3	13	83	Archaea;Thaumarchaeota;Nitrososphaeria;Nitrosopumilales;Nitrosopumilaceae;Candidatus_Nitrosopumilus;uncultured_archaeon	GU207316.1.916	99.043	0
UNI271	0	0	2	0	4	14	3	2	56	0	1	0	0	0	0	2	1	88	Archaea;Thaumarchaeota;Nitrososphaeria;Nitrosopumilales;Nitrosopumilaceae;Candidatus_Nitrosopumilus;uncultured_archaeon	HM998404.1.912	99.282	0
UNI2312	0	0	5	0	0	0	0	0	0	0	0	3	0	0	0	0	14	0	Archaea;Thaumarchaeota;Nitrososphaeria;Nitrosopumilales;Nitrosopumilaceae;Candidatus_Nitrosopumilus;uncultured_archaeon	FJ571941.1.1346	98.804	0
UNI269	0	0	1	0	0	0	17	36	2	0	0	1	0	0	0	22	67	1	Archaea;Thaumarchaeota;Nitrososphaeria;Nitrosopumilales;Nitrosopumilaceae;Candidatus_Nitrosopumilus;uncultured_archaeon	KP204689.1.1397	99.282	0
UNI747	0	0	13	0	0	0	23	7	4	0	0	7	0	0	0	25	3	2	Archaea;Thaumarchaeota;Nitrososphaeria;Nitrosopumilales;Nitrosopumilaceae;Candidatus_Nitrosopumilus;uncultured_archaeon	LC080933.1.1440	99.282	0
UNI779	0	0	8	3	1	0	25	9	0	0	0	6	1	0	0	14	8	0	Archaea;Thaumarchaeota;Nitrososphaeria;Nitrosopumilales;Nitrosopumilaceae;Candidatus_Nitrosopumilus;uncultured_archaeon	KM454184.1.914	100	0
UNI1094	0	0	3	0	0	5	49	7	0	0	0	3	0	0	0	40	11	1	Archaea;Thaumarchaeota;Nitrososphaeria;Nitrosopumilales;Nitrosopumilaceae;Candidatus_Nitrosopumilus;uncultured_archaeon	FJ571901.1.1346	99.282	0
UNI2050	0	0	7	0	0	0	0	0	0	0	0	7	0	0	0	0	29	0	Archaea;Thaumarchaeota;Nitrososphaeria;Nitrosopumilales;Nitrosopumilaceae;Candidatus_Nitrosopumilus;uncultured_archaeon	FJ571941.1.1346	98.565	0
UNI449	0	0	3	0	22	40	17	21	4	0	0	7	0	0	0	11	21	1	Archaea;Thaumarchaeota;Nitrososphaeria;Nitrosopumilales;Nitrosopumilaceae;Candidatus_Nitrosopumilus;uncultured_archaeon	FJ571882.1.1346	99.522	0
UNI1302	0	0	2	0	0	0	2	3	29	0	0	1	0	0	0	3	2	22	Archaea;Thaumarchaeota;Nitrososphaeria;Nitrosopumilales;Nitrosopumilaceae;Candidatus_Nitrosopumilus;uncultured_archaeon	FJ571707.1.1346	99.761	0
UNI439	0	0	3	0	1	1	1	11	55	0	0	0	0	0	0	4	5	18	Archaea;Thaumarchaeota;Nitrososphaeria;Nitrosopumilales;Nitrosopumilaceae;Candidatus_Nitrosopumilus;uncultured_archaeon	KP204643.1.1397	99.761	0
UNI3522	0	0	3	0	2	0	0	9	13	0	0	0	0	0	0	0	4	10	Archaea;Thaumarchaeota;Nitrososphaeria;Nitrosopumilales;Nitrosopumilaceae;Candidatus_Nitrosopumilus;uncultured_archaeon	KP204695.1.1397	99.043	0
UNI1945	0	0	2	0	2	1	0	5	8	0	0	1	0	0	0	5	5	10	Archaea;Thaumarchaeota;Nitrososphaeria;Nitrosopumilales;Nitrosopumilaceae;Candidatus_Nitrosopumilus;uncultured_archaeon	FJ981020.1.900	99.282	0
UNI1409	0	0	1	0	0	3	2	2	18	0	1	2	0	0	0	0	0	21	Archaea;Thaumarchaeota;Nitrososphaeria;Nitrosopumilales;Nitrosopumilaceae;Candidatus_Nitrosopumilus;uncultured_archaeon	FJ981020.1.900	99.522	0
UNI2009	0	0	5	0	0	0	4	10	0	0	0	3	0	0	0	11	10	1	Archaea;Thaumarchaeota;Nitrososphaeria;Nitrosopumilales;Nitrosopumilaceae;Candidatus_Nitrosopumilus;uncultured_archaeon	KP204686.1.1397	99.282	0
UNI2860	0	0	2	0	0	0	0	0	11	0	0	0	0	0	0	0	0	8	Archaea;Thaumarchaeota;Nitrososphaeria;Nitrosopumilales;Nitrosopumilaceae;Candidatus_Nitrosopumilus;uncultured_archaeon	KP204699.1.1397	99.043	0
UNI326	0	0	1	0	3	3	0	6	75	0	0	0	0	0	0	0	0	63	Archaea;Thaumarchaeota;Nitrososphaeria;Nitrosopumilales;Nitrosopumilaceae;Candidatus_Nitrosopumilus;uncultured_archaeon	KP204672.1.1397	99.282	0
UNI849	0	0	1	0	2	4	6	6	18	0	0	1	0	0	0	2	3	6	Archaea;Thaumarchaeota;Nitrososphaeria;Nitrosopumilales;Nitrosopumilaceae;Candidatus_Nitrosopumilus;uncultured_archaeon	KY563092.1.1397	99.761	0
UNI619	0	0	2	0	11	22	6	6	3	0	0	4	0	0	0	14	11	1	Archaea;Thaumarchaeota;Nitrososphaeria;Nitrosopumilales;Nitrosopumilaceae;Candidatus_Nitrosopumilus;uncultured_archaeon	FJ571882.1.1346	99.522	0
UNI486	0	0	2	0	0	0	1	10	67	0	0	1	0	0	0	3	0	69	Archaea;Thaumarchaeota;Nitrososphaeria;Nitrosopumilales;Nitrosopumilaceae;Candidatus_Nitrosopumilus;uncultured_archaeon	FJ571707.1.1346	99.522	0
UNI2502	0	0	4	0	3	0	1	4	0	0	0	8	0	0	0	0	2	0	Archaea;Thaumarchaeota;Nitrososphaeria;Nitrosopumilales;Nitrosopumilaceae;Candidatus_Nitrosopumilus;uncultured_archaeon	KP204650.1.1397	99.522	0
UNI1466	0	0	7	0	1	2	1	6	1	0	0	6	0	0	0	0	6	2	Archaea;Thaumarchaeota;Nitrososphaeria;Nitrosopumilales;Nitrosopumilaceae;Candidatus_Nitrosopumilus;uncultured_archaeon	KP204643.1.1397	99.522	0
UNI2617	0	0	2	0	0	1	0	2	6	0	0	0	0	0	0	0	0	12	Archaea;Thaumarchaeota;Nitrososphaeria;Nitrosopumilales;Nitrosopumilaceae;Candidatus_Nitrosopumilus;uncultured_archaeon	FJ981020.1.900	99.282	0
UNI887	0	0	1	0	0	0	26	16	0	0	0	0	0	0	0	15	13	0	Archaea;Thaumarchaeota;Nitrososphaeria;Nitrosopumilales;Nitrosopumilaceae;Candidatus_Nitrosopumilus;uncultured_archaeon	KP204689.1.1397	99.282	0
UNI2171	0	0	4	15	0	0	0	0	0	0	0	0	5	0	0	0	0	0	Archaea;Thaumarchaeota;Nitrososphaeria;Nitrosopumilales;Nitrosopumilaceae;Candidatus_Nitrosopumilus;uncultured_archaeon	LC080984.1.1440	99.761	0
UNI1608	0	0	7	17	0	0	0	0	0	0	0	3	3	0	0	0	0	0	Archaea;Thaumarchaeota;Nitrososphaeria;Nitrosopumilales;Nitrosopumilaceae;Candidatus_Nitrosopumilus;uncultured_archaeon	LC080984.1.1440	99.522	0
UNI1458	0	0	2	0	0	0	0	0	21	0	0	0	0	0	0	1	0	16	Archaea;Thaumarchaeota;Nitrososphaeria;Nitrosopumilales;Nitrosopumilaceae;Candidatus_Nitrosopumilus;uncultured_archaeon	FJ571707.1.1346	99.522	0
UNI1706	0	0	3	0	0	0	9	21	0	0	0	0	0	0	0	16	9	0	Archaea;Thaumarchaeota;Nitrososphaeria;Nitrosopumilales;Nitrosopumilaceae;Candidatus_Nitrosopumilus;uncultured_archaeon	KP204686.1.1397	99.282	0
UNI513	0	0	3	0	0	0	6	26	1	0	0	0	0	1	0	8	55	0	Archaea;Thaumarchaeota;Nitrososphaeria;Nitrosopumilales;Nitrosopumilaceae;Candidatus_Nitrosopumilus;uncultured_archaeon	KY563092.1.1397	99.282	0
UNI1555	0	0	4	0	0	1	12	2	2	0	0	4	0	0	0	8	3	1	Archaea;Thaumarchaeota;Nitrososphaeria;Nitrosopumilales;Nitrosopumilaceae;Candidatus_Nitrosopumilus;uncultured_archaeon	FJ571941.1.1346	99.282	0
UNI3418	0	0	1	0	0	0	0	0	1	0	0	8	1	0	0	1	2	2	Archaea;Thaumarchaeota;Nitrososphaeria;Nitrosopumilales;Nitrosopumilaceae;Candidatus_Nitrosopumilus;uncultured_archaeon	KP204686.1.1397	99.282	0
UNI1177	0	0	2	0	0	0	7	14	0	0	0	0	0	0	0	1	19	0	Archaea;Thaumarchaeota;Nitrososphaeria;Nitrosopumilales;Nitrosopumilaceae;Candidatus_Nitrosopumilus;uncultured_archaeon	KY563092.1.1397	99.761	0
UNI2525	0	0	1	0	0	0	4	8	0	0	0	4	0	0	0	7	5	0	Archaea;Thaumarchaeota;Nitrososphaeria;Nitrosopumilales;Nitrosopumilaceae;Candidatus_Nitrosopumilus;uncultured_archaeon	LC139814.1.900	99.281	0
UNI1080	0	0	2	0	0	0	0	1	45	0	0	0	0	0	0	1	0	23	Archaea;Thaumarchaeota;Nitrososphaeria;Nitrosopumilales;Nitrosopumilaceae;Candidatus_Nitrosopumilus;uncultured_archaeon	FJ981020.1.900	99.761	0
UNI413	0	0	2	0	5	17	5	10	29	0	0	1	0	0	0	9	13	10	Archaea;Thaumarchaeota;Nitrososphaeria;Nitrosopumilales;Nitrosopumilaceae;Candidatus_Nitrosopumilus;uncultured_archaeon	KY563092.1.1397	99.522	0
UNI1907	0	0	1	0	0	0	0	1	34	0	0	0	0	0	0	0	0	11	Archaea;Thaumarchaeota;Nitrososphaeria;Nitrosopumilales;Nitrosopumilaceae;Candidatus_Nitrosopumilus;uncultured_archaeon	FJ571726.1.1346	99.761	0
UNI3359	0	0	1	0	0	0	0	0	8	0	0	0	0	0	0	0	0	1	Archaea;Thaumarchaeota;Nitrososphaeria;Nitrosopumilales;Nitrosopumilaceae;Candidatus_Nitrosopumilus;uncultured_archaeon	KP204685.1.1397	99.282	0
UNI296	0	0	3	0	2	17	11	7	33	0	0	2	0	0	0	15	17	19	Archaea;Thaumarchaeota;Nitrososphaeria;Nitrosopumilales;Nitrosopumilaceae;Candidatus_Nitrosopumilus;uncultured_archaeon	KY563092.1.1397	99.282	0
UNI2059	0	0	5	0	0	0	11	7	0	0	0	5	0	0	0	2	4	0	Archaea;Thaumarchaeota;Nitrososphaeria;Nitrosopumilales;Nitrosopumilaceae;Candidatus_Nitrosopumilus;uncultured_archaeon	FJ571901.1.1346	99.282	0
UNI2223	0	0	1	0	0	2	0	1	15	0	0	0	0	0	0	0	0	10	Archaea;Thaumarchaeota;Nitrososphaeria;Nitrosopumilales;Nitrosopumilaceae;Candidatus_Nitrosopumilus;uncultured_archaeon	FJ981020.1.900	99.282	0
UNI380	0	0	1	0	0	1	0	2	77	0	0	0	0	0	0	1	0	51	Archaea;Thaumarchaeota;Nitrososphaeria;Nitrosopumilales;Nitrosopumilaceae;Candidatus_Nitrosopumilus;uncultured_archaeon	KP204672.1.1397	99.522	0
UNI1893	0	0	1	28	0	0	0	0	0	0	0	1	3	0	0	1	0	0	Archaea;Thaumarchaeota;Nitrososphaeria;Nitrosopumilales;Nitrosopumilaceae;Candidatus_Nitrosopumilus;uncultured_archaeon	LC080984.1.1440	99.522	0
UNI463	0	0	2	0	2	5	0	0	51	0	0	1	0	0	0	1	0	48	Archaea;Thaumarchaeota;Nitrososphaeria;Nitrosopumilales;Nitrosopumilaceae;Candidatus_Nitrosopumilus;uncultured_archaeon	KP204672.1.1397	99.522	0
UNI640	0	0	1	0	0	0	0	3	51	0	0	0	0	0	0	0	0	49	Archaea;Thaumarchaeota;Nitrososphaeria;Nitrosopumilales;Nitrosopumilaceae;Candidatus_Nitrosopumilus;uncultured_archaeon	FJ981020.1.900	99.761	0
UNI236	0	0	1	0	0	3	0	5	111	0	0	0	0	0	0	1	3	79	Archaea;Thaumarchaeota;Nitrososphaeria;Nitrosopumilales;Nitrosopumilaceae;Candidatus_Nitrosopumilus;uncultured_archaeon	KP204672.1.1397	99.761	0
UNI2070	0	0	1	0	4	8	3	9	0	0	0	2	0	0	0	0	1	1	Archaea;Thaumarchaeota;Nitrososphaeria;Nitrosopumilales;Nitrosopumilaceae;Candidatus_Nitrosopumilus;uncultured_archaeon	FJ571882.1.1346	99.522	0
UNI2243	0	0	2	0	0	0	1	8	24	0	0	2	0	0	0	2	3	10	Archaea;Thaumarchaeota;Nitrososphaeria;Nitrosopumilales;Nitrosopumilaceae;Candidatus_Nitrosopumilus;uncultured_archaeon	KP204699.1.1397	99.282	0
UNI715	0	0	1	0	1	10	5	2	16	0	0	0	0	0	0	3	13	3	Archaea;Thaumarchaeota;Nitrososphaeria;Nitrosopumilales;Nitrosopumilaceae;Candidatus_Nitrosopumilus;uncultured_archaeon	KY563092.1.1397	99.522	0
UNI775	0	0	1	0	0	0	8	15	0	0	0	0	0	0	0	16	18	0	Archaea;Thaumarchaeota;Nitrososphaeria;Nitrosopumilales;Nitrosopumilaceae;Candidatus_Nitrosopumilus;uncultured_archaeon	KP204689.1.1397	99.522	0
UNI1644	0	0	1	0	0	0	0	3	28	0	0	0	0	0	0	0	0	18	Archaea;Thaumarchaeota;Nitrososphaeria;Nitrosopumilales;Nitrosopumilaceae;Candidatus_Nitrosopumilus;uncultured_archaeon	FJ981020.1.900	100	0
UNI1204	0	0	2	0	6	9	7	9	0	0	0	1	0	0	0	7	7	2	Archaea;Thaumarchaeota;Nitrososphaeria;Nitrosopumilales;Nitrosopumilaceae;Candidatus_Nitrosopumilus;uncultured_archaeon	FJ571882.1.1346	99.282	0
UNI3484	0	0	1	0	0	0	0	0	12	0	0	0	0	0	0	0	0	5	Archaea;Thaumarchaeota;Nitrososphaeria;Nitrosopumilales;Nitrosopumilaceae;Candidatus_Nitrosopumilus;uncultured_archaeon	FJ571726.1.1346	99.282	0
UNI800	0	0	1	0	1	11	0	7	43	0	0	0	0	0	0	0	3	28	Archaea;Thaumarchaeota;Nitrososphaeria;Nitrosopumilales;Nitrosopumilaceae;Candidatus_Nitrosopumilus;uncultured_archaeon	HM998404.1.912	99.761	0
UNI708	0	0	1	0	0	0	14	18	0	0	0	0	0	0	0	14	20	0	Archaea;Thaumarchaeota;Nitrososphaeria;Nitrosopumilales;Nitrosopumilaceae;Candidatus_Nitrosopumilus;uncultured_archaeon	KP204689.1.1397	99.282	0
UNI3093	0	0	1	0	0	0	2	5	3	0	0	2	0	0	0	0	6	0	Archaea;Thaumarchaeota;Nitrososphaeria;Nitrosopumilales;Nitrosopumilaceae;Candidatus_Nitrosopumilus;uncultured_archaeon	KP204699.1.1397	98.804	0
UNI1087	0	0	0	0	3	2	0	1	21	0	0	0	0	0	0	0	0	24	Archaea;Thaumarchaeota;Nitrososphaeria;Nitrosopumilales;Nitrosopumilaceae;Candidatus_Nitrosopumilus;uncultured_archaeon	KP204672.1.1397	99.282	0
UNI3333	0	0	0	0	16	0	1	3	1	0	0	0	0	0	0	0	0	1	Archaea;Thaumarchaeota;Nitrososphaeria;Nitrosopumilales;Nitrosopumilaceae;Candidatus_Nitrosopumilus;uncultured_archaeon	GU207312.1.915	99.282	0
UNI418	0	0	0	0	7	19	1	8	42	0	0	4	0	0	0	2	4	22	Archaea;Thaumarchaeota;Nitrososphaeria;Nitrosopumilales;Nitrosopumilaceae;Candidatus_Nitrosopumilus;uncultured_archaeon	KP204643.1.1397	99.761	0
UNI294	0	0	0	0	5	5	0	1	78	0	1	0	0	0	0	0	0	48	Archaea;Thaumarchaeota;Nitrososphaeria;Nitrosopumilales;Nitrosopumilaceae;Candidatus_Nitrosopumilus;uncultured_archaeon	KP204699.1.1397	99.522	0
UNI3082	0	0	0	0	20	4	0	0	0	0	0	0	0	0	0	0	0	0	Archaea;Thaumarchaeota;Nitrososphaeria;Nitrosopumilales;Nitrosopumilaceae;Candidatus_Nitrosopumilus;uncultured_archaeon	KP204678.1.1397	99.761	0
UNI666	0	0	0	0	2	3	0	0	59	0	0	0	0	0	0	0	0	22	Archaea;Thaumarchaeota;Nitrososphaeria;Nitrosopumilales;Nitrosopumilaceae;Candidatus_Nitrosopumilus;uncultured_archaeon	KP204699.1.1397	99.761	0
UNI1454	0	0	0	0	3	1	0	0	35	0	0	0	0	0	0	0	0	8	Archaea;Thaumarchaeota;Nitrososphaeria;Nitrosopumilales;Nitrosopumilaceae;Candidatus_Nitrosopumilus;uncultured_archaeon	KP204641.1.1398	99.523	0
UNI411	0	0	0	0	5	1	0	0	75	0	0	0	0	0	0	0	0	27	Archaea;Thaumarchaeota;Nitrososphaeria;Nitrosopumilales;Nitrosopumilaceae;Candidatus_Nitrosopumilus;uncultured_archaeon	KP204699.1.1397	99.761	0
UNI638	0	0	0	0	4	3	0	0	42	0	0	0	0	0	0	0	0	32	Archaea;Thaumarchaeota;Nitrososphaeria;Nitrosopumilales;Nitrosopumilaceae;Candidatus_Nitrosopumilus;uncultured_archaeon	KP204641.1.1398	99.045	0
UNI1411	0	0	0	0	1	7	0	4	18	0	0	0	0	0	0	0	2	10	Archaea;Thaumarchaeota;Nitrososphaeria;Nitrosopumilales;Nitrosopumilaceae;Candidatus_Nitrosopumilus;uncultured_archaeon	HM998404.1.912	99.522	0
UNI1532	0	0	0	0	1	0	0	0	46	0	1	0	0	0	0	0	0	10	Archaea;Thaumarchaeota;Nitrososphaeria;Nitrosopumilales;Nitrosopumilaceae;Candidatus_Nitrosopumilus;uncultured_archaeon	AB629617.1.914	99.522	0
UNI913	0	0	0	0	4	4	0	2	35	0	0	0	0	0	0	2	4	26	Archaea;Thaumarchaeota;Nitrososphaeria;Nitrosopumilales;Nitrosopumilaceae;Candidatus_Nitrosopumilus;uncultured_archaeon	HM998404.1.912	99.282	0
UNI3354	0	0	0	0	2	0	0	0	15	0	0	0	0	0	0	0	0	2	Archaea;Thaumarchaeota;Nitrososphaeria;Nitrosopumilales;Nitrosopumilaceae;Candidatus_Nitrosopumilus;uncultured_archaeon	KP204672.1.1397	99.522	0
UNI2420	0	0	0	0	1	0	0	0	18	0	0	0	0	0	0	0	0	3	Archaea;Thaumarchaeota;Nitrososphaeria;Nitrosopumilales;Nitrosopumilaceae;Candidatus_Nitrosopumilus;uncultured_archaeon	KP204685.1.1397	99.282	0
UNI3403	0	0	0	0	5	0	3	6	0	0	0	3	0	0	0	0	3	0	Archaea;Thaumarchaeota;Nitrososphaeria;Nitrosopumilales;Nitrosopumilaceae;Candidatus_Nitrosopumilus;uncultured_archaeon	KP204650.1.1397	99.761	0
UNI1731	0	0	0	0	2	0	0	0	28	0	0	0	0	0	0	0	0	9	Archaea;Thaumarchaeota;Nitrososphaeria;Nitrosopumilales;Nitrosopumilaceae;Candidatus_Nitrosopumilus;uncultured_archaeon	KP204641.1.1398	99.284	0
UNI1444	0	0	0	0	3	4	4	3	5	0	0	1	0	0	0	0	4	2	Archaea;Thaumarchaeota;Nitrososphaeria;Nitrosopumilales;Nitrosopumilaceae;Candidatus_Nitrosopumilus;uncultured_archaeon	KY563092.1.1397	99.522	0
UNI911	0	0	0	0	1	0	0	0	46	0	0	0	0	0	0	0	0	10	Archaea;Thaumarchaeota;Nitrososphaeria;Nitrosopumilales;Nitrosopumilaceae;Candidatus_Nitrosopumilus;uncultured_archaeon	KP204641.1.1398	99.284	0
UNI2661	0	0	0	0	1	0	0	0	16	0	0	0	0	0	0	0	0	11	Archaea;Thaumarchaeota;Nitrososphaeria;Nitrosopumilales;Nitrosopumilaceae;Candidatus_Nitrosopumilus;uncultured_archaeon	KP204641.1.1398	99.523	0
UNI545	0	0	0	0	2	4	0	0	44	0	0	0	0	0	0	0	0	36	Archaea;Thaumarchaeota;Nitrososphaeria;Nitrosopumilales;Nitrosopumilaceae;Candidatus_Nitrosopumilus;uncultured_archaeon	KP204641.1.1398	99.284	0
UNI1011	0	0	0	0	1	4	0	0	35	0	0	0	0	0	0	0	0	19	Archaea;Thaumarchaeota;Nitrososphaeria;Nitrosopumilales;Nitrosopumilaceae;Candidatus_Nitrosopumilus;uncultured_archaeon	KP204641.1.1398	99.284	0
UNI676	0	0	0	0	1	1	0	0	53	0	0	0	0	0	0	0	0	18	Archaea;Thaumarchaeota;Nitrososphaeria;Nitrosopumilales;Nitrosopumilaceae;Candidatus_Nitrosopumilus;uncultured_archaeon	KP204699.1.1397	100	0
UNI767	0	0	0	0	1	2	0	0	50	0	0	0	0	0	0	0	0	31	Archaea;Thaumarchaeota;Nitrososphaeria;Nitrosopumilales;Nitrosopumilaceae;Candidatus_Nitrosopumilus;uncultured_archaeon	KP204641.1.1398	99.045	0
UNI1121	0	0	0	0	1	1	0	1	47	0	0	0	0	0	0	0	0	10	Archaea;Thaumarchaeota;Nitrososphaeria;Nitrosopumilales;Nitrosopumilaceae;Candidatus_Nitrosopumilus;uncultured_archaeon	KP204699.1.1397	99.522	0
UNI2725	0	0	0	0	2	0	0	0	15	0	0	0	0	0	0	0	0	5	Archaea;Thaumarchaeota;Nitrososphaeria;Nitrosopumilales;Nitrosopumilaceae;Candidatus_Nitrosopumilus;uncultured_archaeon	KP204699.1.1397	99.761	0
UNI2512	0	0	0	0	0	10	0	0	8	0	0	0	0	0	1	0	0	0	Archaea;Thaumarchaeota;Nitrososphaeria;Nitrosopumilales;Nitrosopumilaceae;Candidatus_Nitrosopumilus;uncultured_archaeon	KP204647.1.1397	100	0
UNI1269	0	0	0	0	0	5	0	0	22	0	0	0	0	0	0	0	0	12	Archaea;Thaumarchaeota;Nitrososphaeria;Nitrosopumilales;Nitrosopumilaceae;Candidatus_Nitrosopumilus;uncultured_archaeon	KP204641.1.1398	99.284	0
UNI1191	0	0	0	0	0	4	1	1	21	0	0	0	0	0	0	2	2	24	Archaea;Thaumarchaeota;Nitrososphaeria;Nitrosopumilales;Nitrosopumilaceae;Candidatus_Nitrosopumilus;uncultured_archaeon	FJ981020.1.900	99.522	0
UNI969	0	0	0	0	0	3	1	0	26	0	0	0	0	0	0	0	0	13	Archaea;Thaumarchaeota;Nitrososphaeria;Nitrosopumilales;Nitrosopumilaceae;Candidatus_Nitrosopumilus;uncultured_archaeon	KP204685.1.1397	99.522	0
UNI732	0	0	0	0	0	1	2	10	46	0	0	0	0	0	0	1	0	56	Archaea;Thaumarchaeota;Nitrososphaeria;Nitrosopumilales;Nitrosopumilaceae;Candidatus_Nitrosopumilus;uncultured_archaeon	FJ981020.1.900	99.522	0
UNI3508	0	0	0	0	0	1	0	0	11	0	0	0	0	0	0	0	0	2	Archaea;Thaumarchaeota;Nitrososphaeria;Nitrosopumilales;Nitrosopumilaceae;Candidatus_Nitrosopumilus;uncultured_archaeon	KP204685.1.1397	99.522	0
UNI759	0	0	0	0	0	3	0	1	25	0	0	0	0	0	0	0	0	20	Archaea;Thaumarchaeota;Nitrososphaeria;Nitrosopumilales;Nitrosopumilaceae;Candidatus_Nitrosopumilus;uncultured_archaeon	KP204685.1.1397	99.282	0
UNI1870	0	0	0	0	0	1	0	0	19	0	0	0	0	0	0	0	0	10	Archaea;Thaumarchaeota;Nitrososphaeria;Nitrosopumilales;Nitrosopumilaceae;Candidatus_Nitrosopumilus;uncultured_archaeon	KP204641.1.1398	99.045	0
UNI1603	0	0	0	0	0	2	3	2	10	0	0	0	0	0	0	2	2	7	Archaea;Thaumarchaeota;Nitrososphaeria;Nitrosopumilales;Nitrosopumilaceae;Candidatus_Nitrosopumilus;uncultured_archaeon	KY563092.1.1397	99.282	0
UNI2422	0	0	0	0	0	1	0	0	17	0	0	0	0	0	0	0	0	7	Archaea;Thaumarchaeota;Nitrososphaeria;Nitrosopumilales;Nitrosopumilaceae;Candidatus_Nitrosopumilus;uncultured_archaeon	KP204650.1.1397	99.522	0
UNI416	0	0	0	0	0	0	27	29	0	0	0	0	0	0	0	31	29	0	Archaea;Thaumarchaeota;Nitrososphaeria;Nitrosopumilales;Nitrosopumilaceae;Candidatus_Nitrosopumilus;uncultured_archaeon	KP204689.1.1397	99.043	0
UNI996	0	0	0	0	0	0	8	3	1	0	0	0	0	0	0	30	1	0	Archaea;Thaumarchaeota;Nitrososphaeria;Nitrosopumilales;Nitrosopumilaceae;Candidatus_Nitrosopumilus;uncultured_archaeon	KP204689.1.1397	99.043	0
UNI2436	0	0	0	0	0	0	3	6	0	0	0	0	0	0	0	1	9	0	Archaea;Thaumarchaeota;Nitrososphaeria;Nitrosopumilales;Nitrosopumilaceae;Candidatus_Nitrosopumilus;uncultured_archaeon	KP204689.1.1397	99.282	0
UNI521	0	0	0	0	0	0	14	2	0	0	0	0	0	0	0	56	5	1	Archaea;Thaumarchaeota;Nitrososphaeria;Nitrosopumilales;Nitrosopumilaceae;Candidatus_Nitrosopumilus;uncultured_archaeon	KP204689.1.1397	98.804	0
UNI84	0	0	0	0	0	0	70	68	1	0	0	2	0	0	0	98	119	0	Archaea;Thaumarchaeota;Nitrososphaeria;Nitrosopumilales;Nitrosopumilaceae;Candidatus_Nitrosopumilus;uncultured_archaeon	KP204689.1.1397	99.282	0
UNI256	0	0	0	0	0	0	35	37	0	0	0	0	0	0	0	25	38	0	Archaea;Thaumarchaeota;Nitrososphaeria;Nitrosopumilales;Nitrosopumilaceae;Candidatus_Nitrosopumilus;uncultured_archaeon	KP204689.1.1397	99.522	0
UNI853	0	0	0	0	0	0	4	16	0	0	0	1	0	0	0	6	18	0	Archaea;Thaumarchaeota;Nitrososphaeria;Nitrosopumilales;Nitrosopumilaceae;Candidatus_Nitrosopumilus;uncultured_archaeon	KP204689.1.1397	99.043	0
UNI1854	0	0	0	0	0	0	1	3	0	0	0	0	0	0	0	16	2	0	Archaea;Thaumarchaeota;Nitrososphaeria;Nitrosopumilales;Nitrosopumilaceae;Candidatus_Nitrosopumilus;uncultured_archaeon	KP204689.1.1397	99.282	0
UNI3003	0	0	0	0	0	0	1	4	12	0	0	0	0	0	0	0	0	4	Archaea;Thaumarchaeota;Nitrososphaeria;Nitrosopumilales;Nitrosopumilaceae;Candidatus_Nitrosopumilus;uncultured_archaeon	KP204699.1.1397	99.522	0
UNI2353	0	0	0	0	0	0	2	12	0	0	0	0	0	0	0	0	2	0	Archaea;Thaumarchaeota;Nitrososphaeria;Nitrosopumilales;Nitrosopumilaceae;Candidatus_Nitrosopumilus;uncultured_archaeon	KY563092.1.1397	99.522	0
UNI690	0	0	0	0	0	0	7	25	0	0	0	0	0	0	0	4	39	1	Archaea;Thaumarchaeota;Nitrososphaeria;Nitrosopumilales;Nitrosopumilaceae;Candidatus_Nitrosopumilus;uncultured_archaeon	KY563092.1.1397	99.522	0
UNI1812	0	0	0	0	0	0	0	2	24	0	0	0	0	0	0	0	0	15	Archaea;Thaumarchaeota;Nitrososphaeria;Nitrosopumilales;Nitrosopumilaceae;Candidatus_Nitrosopumilus;uncultured_archaeon	FJ981020.1.900	99.522	0
UNI328	0	0	0	0	0	0	0	2	57	0	0	3	0	0	0	0	0	65	Archaea;Thaumarchaeota;Nitrososphaeria;Nitrosopumilales;Nitrosopumilaceae;Candidatus_Nitrosopumilus;uncultured_archaeon	KP204672.1.1397	99.043	0
UNI959	0	0	0	0	0	0	0	0	47	0	0	0	0	0	0	0	0	25	Archaea;Thaumarchaeota;Nitrososphaeria;Nitrosopumilales;Nitrosopumilaceae;Candidatus_Nitrosopumilus;uncultured_archaeon	KP204699.1.1397	99.282	0
UNI499	0	0	0	0	0	0	0	0	52	0	1	0	0	0	0	0	0	46	Archaea;Thaumarchaeota;Nitrososphaeria;Nitrosopumilales;Nitrosopumilaceae;Candidatus_Nitrosopumilus;uncultured_archaeon	EU084520.1.910	99.284	0
UNI390	0	0	0	0	0	0	0	0	53	0	0	0	0	0	0	0	0	34	Archaea;Thaumarchaeota;Nitrososphaeria;Nitrosopumilales;Nitrosopumilaceae;Candidatus_Nitrosopumilus;uncultured_archaeon	KP204672.1.1397	99.282	0
UNI719	0	0	0	0	0	0	0	0	35	0	0	0	0	0	0	0	0	23	Archaea;Thaumarchaeota;Nitrososphaeria;Nitrosopumilales;Nitrosopumilaceae;Candidatus_Nitrosopumilus;uncultured_archaeon	KP204672.1.1397	99.522	0
UNI506	0	0	0	0	0	0	0	0	73	0	0	0	0	0	0	0	0	32	Archaea;Thaumarchaeota;Nitrososphaeria;Nitrosopumilales;Nitrosopumilaceae;Candidatus_Nitrosopumilus;uncultured_archaeon	EU084520.1.910	99.523	0
UNI3211	0	0	0	0	0	0	0	0	24	0	0	0	0	0	0	0	0	6	Archaea;Thaumarchaeota;Nitrososphaeria;Nitrosopumilales;Nitrosopumilaceae;Candidatus_Nitrosopumilus;uncultured_archaeon	FJ571726.1.1346	99.522	0
UNI898	0	0	0	0	0	0	0	0	36	0	1	0	0	0	0	0	0	24	Archaea;Thaumarchaeota;Nitrososphaeria;Nitrosopumilales;Nitrosopumilaceae;Candidatus_Nitrosopumilus;uncultured_archaeon	KP204672.1.1397	99.282	0
UNI888	0	0	0	0	0	0	0	0	33	0	0	0	0	0	0	0	3	18	Archaea;Thaumarchaeota;Nitrososphaeria;Nitrosopumilales;Nitrosopumilaceae;Candidatus_Nitrosopumilus;uncultured_archaeon	KP204699.1.1397	99.522	0
UNI2264	0	0	0	0	0	0	0	0	20	0	1	0	0	0	0	0	0	7	Archaea;Thaumarchaeota;Nitrososphaeria;Nitrosopumilales;Nitrosopumilaceae;Candidatus_Nitrosopumilus;uncultured_archaeon	KP204650.1.1397	99.282	0
UNI1471	0	0	0	0	0	0	0	0	49	0	0	0	0	0	0	0	0	34	Archaea;Thaumarchaeota;Nitrososphaeria;Nitrosopumilales;Nitrosopumilaceae;Candidatus_Nitrosopumilus;uncultured_archaeon	FJ571707.1.1346	99.043	0
UNI2119	0	0	0	0	0	0	0	0	40	0	1	0	0	0	0	0	0	13	Archaea;Thaumarchaeota;Nitrososphaeria;Nitrosopumilales;Nitrosopumilaceae;Candidatus_Nitrosopumilus;uncultured_archaeon	EU084520.1.910	99.284	0
UNI3138	0	0	0	0	0	0	0	0	15	0	0	0	0	0	0	0	0	6	Archaea;Thaumarchaeota;Nitrososphaeria;Nitrosopumilales;Nitrosopumilaceae;Candidatus_Nitrosopumilus;uncultured_archaeon	GU270142.1.914	99.522	0
UNI962	0	0	0	0	0	0	0	0	60	0	0	0	0	0	0	0	0	25	Archaea;Thaumarchaeota;Nitrososphaeria;Nitrosopumilales;Nitrosopumilaceae;Candidatus_Nitrosopumilus;uncultured_archaeon	EU084520.1.910	99.523	0
UNI3229	0	0	0	0	0	0	0	0	25	0	0	0	0	0	0	0	0	20	Archaea;Thaumarchaeota;Nitrososphaeria;Nitrosopumilales;Nitrosopumilaceae;Candidatus_Nitrosopumilus;uncultured_archaeon	GQ926264.1.906	99.522	0
UNI3266	0	0	0	0	0	0	0	0	8	0	0	0	0	0	0	0	0	5	Archaea;Thaumarchaeota;Nitrososphaeria;Nitrosopumilales;Nitrosopumilaceae;Candidatus_Nitrosopumilus;uncultured_archaeon	GQ926264.1.906	99.522	0
UNI3265	0	0	0	0	0	0	0	0	17	0	0	0	0	0	0	0	0	14	Archaea;Thaumarchaeota;Nitrososphaeria;Nitrosopumilales;Nitrosopumilaceae;Candidatus_Nitrosopumilus;uncultured_archaeon	EU084520.1.910	99.284	0
UNI973	0	0	0	0	0	0	0	0	46	0	0	0	0	0	0	0	0	13	Archaea;Thaumarchaeota;Nitrososphaeria;Nitrosopumilales;Nitrosopumilaceae;Candidatus_Nitrosopumilus;uncultured_archaeon	AB629617.1.914	99.282	0
UNI3310	0	0	0	0	0	0	0	0	13	0	0	0	0	0	0	0	0	2	Archaea;Thaumarchaeota;Nitrososphaeria;Nitrosopumilales;Nitrosopumilaceae;Candidatus_Nitrosopumilus;uncultured_archaeon	KP204685.1.1397	99.761	0
UNI1883	0	0	0	0	0	0	0	0	14	0	0	0	0	0	0	0	0	13	Archaea;Thaumarchaeota;Nitrososphaeria;Nitrosopumilales;Nitrosopumilaceae;Candidatus_Nitrosopumilus;uncultured_archaeon	FJ981020.1.900	99.761	0
UNI1015	0	0	0	0	0	0	0	0	28	0	1	0	0	0	0	0	0	13	Archaea;Thaumarchaeota;Nitrososphaeria;Nitrosopumilales;Nitrosopumilaceae;Candidatus_Nitrosopumilus;uncultured_archaeon	KP204672.1.1397	99.043	0
UNI1674	0	0	0	0	0	0	0	0	17	0	0	0	0	0	0	0	0	8	Archaea;Thaumarchaeota;Nitrososphaeria;Nitrosopumilales;Nitrosopumilaceae;Candidatus_Nitrosopumilus;uncultured_archaeon	KP204672.1.1397	99.282	0
UNI1226	0	0	0	0	0	0	0	0	54	0	0	0	0	0	0	0	0	20	Archaea;Thaumarchaeota;Nitrososphaeria;Nitrosopumilales;Nitrosopumilaceae;Candidatus_Nitrosopumilus;uncultured_archaeon	EU084520.1.910	99.761	0
UNI2933	0	0	0	0	0	0	0	0	20	0	0	0	0	0	0	0	0	23	Archaea;Thaumarchaeota;Nitrososphaeria;Nitrosopumilales;Nitrosopumilaceae;Candidatus_Nitrosopumilus;uncultured_archaeon	FJ571707.1.1346	99.282	0
UNI2208	0	0	0	0	0	0	0	0	16	0	0	0	0	0	0	0	0	4	Archaea;Thaumarchaeota;Nitrososphaeria;Nitrosopumilales;Nitrosopumilaceae;Candidatus_Nitrosopumilus;uncultured_archaeon	KP204699.1.1397	99.761	0
UNI1648	0	0	0	0	0	0	0	0	21	0	0	0	0	0	0	0	0	7	Archaea;Thaumarchaeota;Nitrososphaeria;Nitrosopumilales;Nitrosopumilaceae;Candidatus_Nitrosopumilus;uncultured_archaeon	KP204685.1.1397	99.522	0
UNI2972	0	0	0	0	0	0	0	0	11	0	0	0	0	0	0	0	0	4	Archaea;Thaumarchaeota;Nitrososphaeria;Nitrosopumilales;Nitrosopumilaceae;Candidatus_Nitrosopumilus;uncultured_archaeon	GQ926264.1.906	99.282	0
UNI2313	0	0	0	0	0	0	0	0	24	0	0	0	0	0	0	0	0	6	Archaea;Thaumarchaeota;Nitrososphaeria;Nitrosopumilales;Nitrosopumilaceae;Candidatus_Nitrosopumilus;uncultured_archaeon	EU084520.1.910	99.523	0
UNI3238	0	0	0	0	0	0	0	0	14	0	0	0	0	0	0	0	0	18	Archaea;Thaumarchaeota;Nitrososphaeria;Nitrosopumilales;Nitrosopumilaceae;Candidatus_Nitrosopumilus;uncultured_archaeon	GQ926264.1.906	99.043	0
UNI2217	0	0	0	0	0	0	0	0	17	0	0	0	0	0	0	0	0	13	Archaea;Thaumarchaeota;Nitrososphaeria;Nitrosopumilales;Nitrosopumilaceae;Candidatus_Nitrosopumilus;uncultured_archaeon	EU084520.1.910	99.045	0
UNI2314	0	3	1	0	3	9	0	0	0	0	0	2	0	0	0	0	0	0	Archaea;Thaumarchaeota;Nitrososphaeria;Nitrosopumilales;Nitrosopumilaceae;Candidatus_Nitrosopumilus;uncultured_archaeon_APA4-0cm	AF119138.1.1393	99.761	0
UNI2052	0	7	0	0	5	8	0	1	0	0	0	3	0	0	0	0	1	0	Archaea;Thaumarchaeota;Nitrososphaeria;Nitrosopumilales;Nitrosopumilaceae;Candidatus_Nitrosopumilus;uncultured_archaeon_APA4-0cm	AF119138.1.1393	99.761	0
UNI1620	0	3	2	0	2	9	2	3	0	0	0	5	0	0	0	0	1	0	Archaea;Thaumarchaeota;Nitrososphaeria;Nitrosopumilales;Nitrosopumilaceae;Candidatus_Nitrosopumilus;uncultured_archaeon_APA4-0cm	AF119138.1.1393	99.522	0
UNI8	34	158	360	4	41	86	490	590	279	0	7	375	96	0	0	852	736	191	Archaea;Thaumarchaeota;Nitrososphaeria;Nitrosopumilales;Nitrosopumilaceae;Candidatus_Nitrosopumilus;uncultured_crenarchaeote	AY326274.1.914	99.761	0
UNI1256	5	2	9	17	0	0	0	1	0	0	0	0	10	0	0	1	2	0	Archaea;Thaumarchaeota;Nitrososphaeria;Nitrosopumilales;Nitrosopumilaceae;Candidatus_Nitrosopumilus;uncultured_crenarchaeote	AJ567660.1.922	99.761	0
UNI662	15	10	5	23	0	0	0	2	0	0	0	3	12	0	0	2	4	0	Archaea;Thaumarchaeota;Nitrososphaeria;Nitrosopumilales;Nitrosopumilaceae;Candidatus_Nitrosopumilus;uncultured_crenarchaeote	AJ567660.1.922	99.761	0
UNI2275	3	0	2	0	7	1	0	1	3	8	5	0	0	0	5	0	0	1	Archaea;Thaumarchaeota;Nitrososphaeria;Nitrosopumilales;Nitrosopumilaceae;Candidatus_Nitrosopumilus;uncultured_crenarchaeote	EU486939.1.912	99.761	0
UNI292	2	6	2	0	0	0	10	31	6	0	0	4	2	0	0	11	43	5	Archaea;Thaumarchaeota;Nitrososphaeria;Nitrosopumilales;Nitrosopumilaceae;Candidatus_Nitrosopumilus;uncultured_crenarchaeote	AB239078.1.915	99.522	0
UNI1326	9	25	2	7	3	0	0	0	0	0	0	3	1	0	0	0	0	0	Archaea;Thaumarchaeota;Nitrososphaeria;Nitrosopumilales;Nitrosopumilaceae;Candidatus_Nitrosopumilus;uncultured_crenarchaeote	EF414501.1.914	99.522	0
UNI6	37	134	373	3	23	89	570	612	293	0	11	491	129	0	0	1118	941	225	Archaea;Thaumarchaeota;Nitrososphaeria;Nitrosopumilales;Nitrosopumilaceae;Candidatus_Nitrosopumilus;uncultured_crenarchaeote	AY326274.1.914	99.522	0
UNI946	2	4	5	27	0	0	0	0	0	0	0	2	13	0	0	1	1	0	Archaea;Thaumarchaeota;Nitrososphaeria;Nitrosopumilales;Nitrosopumilaceae;Candidatus_Nitrosopumilus;uncultured_crenarchaeote	AJ567660.1.922	100	0
UNI12	12	89	214	4	13	58	309	344	158	0	0	154	28	0	0	382	334	63	Archaea;Thaumarchaeota;Nitrososphaeria;Nitrosopumilales;Nitrosopumilaceae;Candidatus_Nitrosopumilus;uncultured_crenarchaeote	AY326274.1.914	100	0
UNI40	3	59	75	2	11	27	110	163	69	0	1	40	6	0	0	75	69	21	Archaea;Thaumarchaeota;Nitrososphaeria;Nitrosopumilales;Nitrosopumilaceae;Candidatus_Nitrosopumilus;uncultured_crenarchaeote	AY326274.1.914	99.761	0
UNI2379	5	11	5	5	1	0	0	0	0	0	0	1	0	0	0	0	0	1	Archaea;Thaumarchaeota;Nitrososphaeria;Nitrosopumilales;Nitrosopumilaceae;Candidatus_Nitrosopumilus;uncultured_crenarchaeote	EF414501.1.914	99.761	0
UNI560	9	9	8	14	0	0	4	2	0	0	0	1	26	0	0	8	4	0	Archaea;Thaumarchaeota;Nitrososphaeria;Nitrosopumilales;Nitrosopumilaceae;Candidatus_Nitrosopumilus;uncultured_crenarchaeote	AJ567660.1.922	99.522	0
UNI2265	3	18	0	4	3	0	0	0	0	0	0	0	0	0	0	0	0	0	Archaea;Thaumarchaeota;Nitrososphaeria;Nitrosopumilales;Nitrosopumilaceae;Candidatus_Nitrosopumilus;uncultured_crenarchaeote	EF414501.1.914	99.761	0
UNI556	1	0	19	2	0	0	8	2	0	0	0	21	11	0	0	6	1	0	Archaea;Thaumarchaeota;Nitrososphaeria;Nitrosopumilales;Nitrosopumilaceae;Candidatus_Nitrosopumilus;uncultured_crenarchaeote	AJ567659.1.915	99.522	0
UNI18	16	64	164	3	17	42	192	281	122	0	1	75	20	0	0	161	172	56	Archaea;Thaumarchaeota;Nitrososphaeria;Nitrosopumilales;Nitrosopumilaceae;Candidatus_Nitrosopumilus;uncultured_crenarchaeote	AY326274.1.914	99.522	0
UNI10	13	107	222	7	16	67	348	306	163	0	3	191	45	0	0	511	371	99	Archaea;Thaumarchaeota;Nitrososphaeria;Nitrosopumilales;Nitrosopumilaceae;Candidatus_Nitrosopumilus;uncultured_crenarchaeote	AY326274.1.914	99.761	0
UNI2128	1	2	2	17	0	0	1	0	0	0	0	1	3	0	0	0	1	0	Archaea;Thaumarchaeota;Nitrososphaeria;Nitrosopumilales;Nitrosopumilaceae;Candidatus_Nitrosopumilus;uncultured_crenarchaeote	EF414501.1.914	99.282	0
UNI1990	1	2	15	0	0	0	13	2	0	0	0	14	2	0	0	9	9	0	Archaea;Thaumarchaeota;Nitrososphaeria;Nitrosopumilales;Nitrosopumilaceae;Candidatus_Nitrosopumilus;uncultured_crenarchaeote	AJ567636.1.915	99.282	0
UNI391	4	9	15	1	1	1	32	37	1	0	0	2	4	0	0	36	13	0	Archaea;Thaumarchaeota;Nitrososphaeria;Nitrosopumilales;Nitrosopumilaceae;Candidatus_Nitrosopumilus;uncultured_crenarchaeote	AJ567654.1.915	99.522	0
UNI778	1	5	8	0	1	0	17	15	0	0	0	4	3	0	0	16	11	0	Archaea;Thaumarchaeota;Nitrososphaeria;Nitrosopumilales;Nitrosopumilaceae;Candidatus_Nitrosopumilus;uncultured_crenarchaeote	AJ567654.1.915	99.761	0
UNI2764	1	2	3	11	3	2	0	0	2	0	0	0	4	0	0	0	0	0	Archaea;Thaumarchaeota;Nitrososphaeria;Nitrosopumilales;Nitrosopumilaceae;Candidatus_Nitrosopumilus;uncultured_crenarchaeote	EF414501.1.914	99.761	0
UNI2521	1	1	0	1	2	0	0	0	2	3	8	0	0	0	6	0	0	0	Archaea;Thaumarchaeota;Nitrososphaeria;Nitrosopumilales;Nitrosopumilaceae;Candidatus_Nitrosopumilus;uncultured_crenarchaeote	EU486939.1.912	99.761	0
UNI1030	1	6	5	13	5	0	5	3	0	0	0	11	5	0	0	4	2	0	Archaea;Thaumarchaeota;Nitrososphaeria;Nitrosopumilales;Nitrosopumilaceae;Candidatus_Nitrosopumilus;uncultured_crenarchaeote	AJ567652.1.914	99.522	0
UNI254	1	3	1	0	0	3	10	30	19	0	0	2	0	0	0	21	59	17	Archaea;Thaumarchaeota;Nitrososphaeria;Nitrosopumilales;Nitrosopumilaceae;Candidatus_Nitrosopumilus;uncultured_crenarchaeote	AB239078.1.915	99.282	0
UNI3276	0	3	4	1	0	0	1	9	0	0	0	3	1	0	0	3	4	0	Archaea;Thaumarchaeota;Nitrososphaeria;Nitrosopumilales;Nitrosopumilaceae;Candidatus_Nitrosopumilus;uncultured_crenarchaeote	AJ567636.1.915	99.522	0
UNI1189	0	6	5	9	10	1	1	0	0	0	0	3	13	0	0	2	0	0	Archaea;Thaumarchaeota;Nitrososphaeria;Nitrosopumilales;Nitrosopumilaceae;Candidatus_Nitrosopumilus;uncultured_crenarchaeote	AJ567652.1.914	99.761	0
UNI3370	0	7	2	3	1	0	0	0	0	0	0	2	0	0	0	0	0	0	Archaea;Thaumarchaeota;Nitrososphaeria;Nitrosopumilales;Nitrosopumilaceae;Candidatus_Nitrosopumilus;uncultured_crenarchaeote	EF414501.1.914	100	0
UNI519	0	3	1	0	0	7	9	20	5	0	0	2	0	0	0	6	21	5	Archaea;Thaumarchaeota;Nitrososphaeria;Nitrosopumilales;Nitrosopumilaceae;Candidatus_Nitrosopumilus;uncultured_crenarchaeote	AB239078.1.915	99.522	0
UNI2226	0	1	7	0	0	2	1	1	0	0	0	2	0	0	0	2	6	0	Archaea;Thaumarchaeota;Nitrososphaeria;Nitrosopumilales;Nitrosopumilaceae;Candidatus_Nitrosopumilus;uncultured_crenarchaeote	AJ567636.1.915	99.761	0
UNI1742	0	3	8	1	0	0	7	5	0	0	0	5	1	0	0	8	2	0	Archaea;Thaumarchaeota;Nitrososphaeria;Nitrosopumilales;Nitrosopumilaceae;Candidatus_Nitrosopumilus;uncultured_crenarchaeote	AJ567636.1.915	99.522	0
UNI1582	0	1	0	2	3	0	0	1	1	10	11	2	0	0	9	0	2	2	Archaea;Thaumarchaeota;Nitrososphaeria;Nitrosopumilales;Nitrosopumilaceae;Candidatus_Nitrosopumilus;uncultured_crenarchaeote	EU486939.1.912	99.522	0
UNI1614	0	2	2	1	1	0	15	14	0	0	0	1	0	0	0	9	5	0	Archaea;Thaumarchaeota;Nitrososphaeria;Nitrosopumilales;Nitrosopumilaceae;Candidatus_Nitrosopumilus;uncultured_crenarchaeote	AJ567654.1.915	100	0
UNI1530	0	2	6	0	2	1	25	16	1	0	0	2	1	0	0	8	4	0	Archaea;Thaumarchaeota;Nitrososphaeria;Nitrosopumilales;Nitrosopumilaceae;Candidatus_Nitrosopumilus;uncultured_crenarchaeote	AJ567654.1.915	99.761	0
UNI3527	0	0	7	9	0	0	1	0	0	0	0	1	2	0	0	2	0	0	Archaea;Thaumarchaeota;Nitrososphaeria;Nitrosopumilales;Nitrosopumilaceae;Candidatus_Nitrosopumilus;uncultured_crenarchaeote	AJ567652.1.914	100	0
UNI1755	0	0	8	10	1	0	2	1	0	0	0	4	6	0	0	3	5	0	Archaea;Thaumarchaeota;Nitrososphaeria;Nitrosopumilales;Nitrosopumilaceae;Candidatus_Nitrosopumilus;uncultured_crenarchaeote	AJ567652.1.914	99.761	0
UNI1863	0	0	1	0	0	0	2	8	6	0	1	0	0	0	0	1	5	3	Archaea;Thaumarchaeota;Nitrososphaeria;Nitrosopumilales;Nitrosopumilaceae;Candidatus_Nitrosopumilus;uncultured_crenarchaeote	AB239078.1.915	99.522	0
UNI2165	0	0	10	0	0	0	9	7	0	0	0	4	3	0	0	9	2	0	Archaea;Thaumarchaeota;Nitrososphaeria;Nitrosopumilales;Nitrosopumilaceae;Candidatus_Nitrosopumilus;uncultured_crenarchaeote	AJ567636.1.915	99.761	0
UNI265	0	0	23	1	0	0	99	52	1	0	0	4	0	0	0	95	65	2	Archaea;Thaumarchaeota;Nitrososphaeria;Nitrosopumilales;Nitrosopumilaceae;Candidatus_Nitrosopumilus;uncultured_crenarchaeote	AY326274.1.914	99.043	0
UNI186	0	0	9	0	0	0	19	51	12	0	0	14	0	0	0	53	51	9	Archaea;Thaumarchaeota;Nitrososphaeria;Nitrosopumilales;Nitrosopumilaceae;Candidatus_Nitrosopumilus;uncultured_crenarchaeote	AY326273.1.911	99.761	0
UNI171	0	0	5	0	0	1	24	52	15	0	0	18	0	0	0	47	73	11	Archaea;Thaumarchaeota;Nitrososphaeria;Nitrosopumilales;Nitrosopumilaceae;Candidatus_Nitrosopumilus;uncultured_crenarchaeote	AY326273.1.911	99.522	0
UNI1224	0	0	4	0	0	1	2	25	5	0	0	2	0	0	0	2	7	2	Archaea;Thaumarchaeota;Nitrososphaeria;Nitrosopumilales;Nitrosopumilaceae;Candidatus_Nitrosopumilus;uncultured_crenarchaeote	AB239078.1.915	99.282	0
UNI1937	0	0	17	0	0	0	4	3	0	0	0	2	0	0	0	8	6	0	Archaea;Thaumarchaeota;Nitrososphaeria;Nitrosopumilales;Nitrosopumilaceae;Candidatus_Nitrosopumilus;uncultured_crenarchaeote	AJ567652.1.914	99.282	0
UNI363	0	0	7	0	0	1	17	34	8	0	0	4	0	0	0	19	30	3	Archaea;Thaumarchaeota;Nitrososphaeria;Nitrosopumilales;Nitrosopumilaceae;Candidatus_Nitrosopumilus;uncultured_crenarchaeote	AY326273.1.911	99.282	0
UNI47	0	0	10	0	0	3	46	90	23	0	0	48	0	0	0	131	187	29	Archaea;Thaumarchaeota;Nitrososphaeria;Nitrosopumilales;Nitrosopumilaceae;Candidatus_Nitrosopumilus;uncultured_crenarchaeote	AY326273.1.911	99.282	0
UNI65	0	0	7	0	0	6	28	64	15	0	0	39	0	0	0	111	163	15	Archaea;Thaumarchaeota;Nitrososphaeria;Nitrosopumilales;Nitrosopumilaceae;Candidatus_Nitrosopumilus;uncultured_crenarchaeote	AY326273.1.911	99.522	0
UNI1957	0	0	10	0	0	0	8	4	0	0	0	5	0	0	0	11	3	0	Archaea;Thaumarchaeota;Nitrososphaeria;Nitrosopumilales;Nitrosopumilaceae;Candidatus_Nitrosopumilus;uncultured_crenarchaeote	AJ567652.1.914	99.043	0
UNI1575	0	0	8	3	0	0	3	1	0	0	0	9	2	0	0	2	2	0	Archaea;Thaumarchaeota;Nitrososphaeria;Nitrosopumilales;Nitrosopumilaceae;Candidatus_Nitrosopumilus;uncultured_crenarchaeote	AJ567659.1.915	99.761	0
UNI1032	0	0	19	3	0	0	7	3	0	0	0	6	5	0	0	4	0	0	Archaea;Thaumarchaeota;Nitrososphaeria;Nitrosopumilales;Nitrosopumilaceae;Candidatus_Nitrosopumilus;uncultured_crenarchaeote	AJ567659.1.915	99.761	0
UNI700	0	0	4	0	0	1	5	21	2	0	0	0	0	0	0	6	21	4	Archaea;Thaumarchaeota;Nitrososphaeria;Nitrosopumilales;Nitrosopumilaceae;Candidatus_Nitrosopumilus;uncultured_crenarchaeote	AB239078.1.915	99.761	0
UNI1871	0	0	3	0	0	0	14	3	0	0	0	0	0	0	0	15	3	0	Archaea;Thaumarchaeota;Nitrososphaeria;Nitrosopumilales;Nitrosopumilaceae;Candidatus_Nitrosopumilus;uncultured_crenarchaeote	AJ567654.1.915	99.043	0
UNI1258	0	0	1	0	0	2	4	22	5	0	0	0	0	0	0	5	11	1	Archaea;Thaumarchaeota;Nitrososphaeria;Nitrosopumilales;Nitrosopumilaceae;Candidatus_Nitrosopumilus;uncultured_crenarchaeote	AY326273.1.911	99.522	0
UNI2514	0	0	0	0	0	1	0	5	19	0	0	0	0	0	0	0	0	9	Archaea;Thaumarchaeota;Nitrososphaeria;Nitrosopumilales;Nitrosopumilaceae;Candidatus_Nitrosopumilus;uncultured_crenarchaeote	AB239078.1.915	100	0
UNI893	0	0	0	0	0	0	0	0	53	0	0	0	0	0	0	0	0	33	Archaea;Thaumarchaeota;Nitrososphaeria;Nitrosopumilales;Nitrosopumilaceae;Candidatus_Nitrosopumilus;uncultured_marine_archaeon	JQ222367.1.914	99.522	0
UNI660	0	0	0	0	0	0	0	0	58	0	0	0	0	0	0	0	0	17	Archaea;Thaumarchaeota;Nitrososphaeria;Nitrosopumilales;Nitrosopumilaceae;Candidatus_Nitrosopumilus;uncultured_marine_archaeon	JQ222324.1.914	99.761	0
UNI253	0	0	0	0	0	0	0	0	89	0	0	0	0	0	0	0	0	63	Archaea;Thaumarchaeota;Nitrososphaeria;Nitrosopumilales;Nitrosopumilaceae;Candidatus_Nitrosopumilus;uncultured_marine_archaeon	JQ222324.1.914	99.282	0
UNI1640	0	0	0	0	0	0	0	0	46	0	1	0	0	0	0	0	0	13	Archaea;Thaumarchaeota;Nitrososphaeria;Nitrosopumilales;Nitrosopumilaceae;Candidatus_Nitrosopumilus;uncultured_marine_archaeon	JQ222367.1.914	100	0
UNI319	0	0	0	0	0	0	0	0	91	0	0	0	0	0	0	0	0	43	Archaea;Thaumarchaeota;Nitrososphaeria;Nitrosopumilales;Nitrosopumilaceae;Candidatus_Nitrosopumilus;uncultured_marine_archaeon	JQ222324.1.914	99.522	0
UNI1762	0	0	0	0	0	0	0	0	29	0	1	0	0	0	0	0	0	14	Archaea;Thaumarchaeota;Nitrososphaeria;Nitrosopumilales;Nitrosopumilaceae;Candidatus_Nitrosopumilus;uncultured_marine_archaeon	JQ222367.1.914	99.761	0
UNI2584	0	0	0	0	0	0	0	0	29	0	0	0	0	0	0	0	0	9	Archaea;Thaumarchaeota;Nitrososphaeria;Nitrosopumilales;Nitrosopumilaceae;Candidatus_Nitrosopumilus;uncultured_marine_archaeon	JQ222367.1.914	99.522	0
UNI3331	0	0	0	0	0	0	0	0	36	0	0	0	0	0	0	0	0	27	Archaea;Thaumarchaeota;Nitrososphaeria;Nitrosopumilales;Nitrosopumilaceae;Candidatus_Nitrosopumilus;uncultured_marine_archaeon	JQ222324.1.914	98.804	0
UNI749	0	0	0	0	0	0	0	0	45	0	0	0	0	0	0	0	0	19	Archaea;Thaumarchaeota;Nitrososphaeria;Nitrosopumilales;Nitrosopumilaceae;Candidatus_Nitrosopumilus;uncultured_marine_archaeon	JQ222324.1.914	99.522	0
UNI1099	0	0	0	0	0	0	0	0	41	0	0	0	0	0	0	0	0	19	Archaea;Thaumarchaeota;Nitrososphaeria;Nitrosopumilales;Nitrosopumilaceae;Candidatus_Nitrosopumilus;uncultured_marine_archaeon	JQ222367.1.914	99.761	0
UNI965	5	14	12	26	6	0	1	1	0	0	0	2	13	0	0	0	0	0	Archaea;Thaumarchaeota;Nitrososphaeria;Nitrosopumilales;Nitrosopumilaceae;Candidatus_Nitrosopumilus;uncultured_marine_group_I_thaumarchaeote	FJ150804.1.1349	99.282	0
UNI244	15	38	14	5	36	7	16	9	1	0	0	12	2	0	0	13	14	1	Archaea;Thaumarchaeota;Nitrososphaeria;Nitrosopumilales;Nitrosopumilaceae;Candidatus_Nitrosopumilus;uncultured_marine_group_I_thaumarchaeote	FJ487499.1.1366	99.761	0
UNI87	8	10	6	1	6	6	10	25	21	0	0	73	8	0	0	165	44	20	Archaea;Thaumarchaeota;Nitrososphaeria;Nitrosopumilales;Nitrosopumilaceae;Candidatus_Nitrosopumilus;uncultured_marine_group_I_thaumarchaeote	FJ002862.1.1276	99.761	0
UNI24	39	80	59	23	178	129	80	114	82	0	0	39	13	0	0	78	125	64	Archaea;Thaumarchaeota;Nitrososphaeria;Nitrosopumilales;Nitrosopumilaceae;Candidatus_Nitrosopumilus;uncultured_marine_group_I_thaumarchaeote	JN886943.1.914	99.522	0
UNI282	12	34	24	4	8	5	16	8	1	0	0	4	0	0	0	11	9	0	Archaea;Thaumarchaeota;Nitrososphaeria;Nitrosopumilales;Nitrosopumilaceae;Candidatus_Nitrosopumilus;uncultured_marine_group_I_thaumarchaeote	FJ487499.1.1366	100	0
UNI399	29	16	26	11	5	1	10	3	0	0	0	11	7	0	0	3	6	0	Archaea;Thaumarchaeota;Nitrososphaeria;Nitrosopumilales;Nitrosopumilaceae;Candidatus_Nitrosopumilus;uncultured_marine_group_I_thaumarchaeote	FJ487499.1.1366	99.282	0
UNI67	28	64	94	54	15	18	45	35	2	0	0	43	44	0	0	41	60	2	Archaea;Thaumarchaeota;Nitrososphaeria;Nitrosopumilales;Nitrosopumilaceae;Candidatus_Nitrosopumilus;uncultured_marine_group_I_thaumarchaeote	FJ487540.1.1439	99.761	0
UNI1501	9	10	9	0	2	5	4	6	0	0	0	3	0	0	0	1	4	1	Archaea;Thaumarchaeota;Nitrososphaeria;Nitrosopumilales;Nitrosopumilaceae;Candidatus_Nitrosopumilus;uncultured_marine_group_I_thaumarchaeote	FJ487499.1.1366	99.282	0
UNI30	38	102	50	17	178	106	75	88	89	0	0	27	15	0	0	62	108	45	Archaea;Thaumarchaeota;Nitrososphaeria;Nitrosopumilales;Nitrosopumilaceae;Candidatus_Nitrosopumilus;uncultured_marine_group_I_thaumarchaeote	JN886943.1.914	99.761	0
UNI694	14	6	4	21	1	0	0	0	0	0	0	9	1	0	0	0	0	0	Archaea;Thaumarchaeota;Nitrososphaeria;Nitrosopumilales;Nitrosopumilaceae;Candidatus_Nitrosopumilus;uncultured_marine_group_I_thaumarchaeote	FJ487499.1.1366	99.522	0
UNI496	30	12	22	11	8	5	18	6	0	0	0	10	2	0	0	8	3	0	Archaea;Thaumarchaeota;Nitrososphaeria;Nitrosopumilales;Nitrosopumilaceae;Candidatus_Nitrosopumilus;uncultured_marine_group_I_thaumarchaeote	FJ487499.1.1366	99.522	0
UNI49	36	110	75	53	39	22	61	43	5	0	0	69	61	0	0	40	96	3	Archaea;Thaumarchaeota;Nitrososphaeria;Nitrosopumilales;Nitrosopumilaceae;Candidatus_Nitrosopumilus;uncultured_marine_group_I_thaumarchaeote	FJ487540.1.1439	99.522	0
UNI135	21	43	55	73	20	12	22	27	1	0	0	25	21	0	0	12	20	0	Archaea;Thaumarchaeota;Nitrososphaeria;Nitrosopumilales;Nitrosopumilaceae;Candidatus_Nitrosopumilus;uncultured_marine_group_I_thaumarchaeote	FJ487540.1.1439	100	0
UNI191	3	4	33	0	0	0	28	15	2	0	0	34	3	0	0	33	35	1	Archaea;Thaumarchaeota;Nitrososphaeria;Nitrosopumilales;Nitrosopumilaceae;Candidatus_Nitrosopumilus;uncultured_marine_group_I_thaumarchaeote	FJ487486.1.1370	99.761	0
UNI68	26	69	42	17	105	66	46	56	43	0	2	17	11	0	0	27	50	20	Archaea;Thaumarchaeota;Nitrososphaeria;Nitrosopumilales;Nitrosopumilaceae;Candidatus_Nitrosopumilus;uncultured_marine_group_I_thaumarchaeote	JN886943.1.914	99.761	0
UNI2291	10	3	3	2	10	0	3	2	0	0	0	0	0	0	0	0	0	3	Archaea;Thaumarchaeota;Nitrososphaeria;Nitrosopumilales;Nitrosopumilaceae;Candidatus_Nitrosopumilus;uncultured_marine_group_I_thaumarchaeote	FJ150804.1.1349	99.522	0
UNI702	25	20	20	11	4	7	7	8	1	0	0	12	3	0	0	3	5	0	Archaea;Thaumarchaeota;Nitrososphaeria;Nitrosopumilales;Nitrosopumilaceae;Candidatus_Nitrosopumilus;uncultured_marine_group_I_thaumarchaeote	FJ487499.1.1366	99.761	0
UNI121	27	47	38	1	21	17	19	15	4	0	0	23	0	0	0	19	35	1	Archaea;Thaumarchaeota;Nitrososphaeria;Nitrosopumilales;Nitrosopumilaceae;Candidatus_Nitrosopumilus;uncultured_marine_group_I_thaumarchaeote	FJ487499.1.1366	99.522	0
UNI680	6	20	33	24	1	2	13	31	25	0	0	0	4	0	0	3	1	18	Archaea;Thaumarchaeota;Nitrososphaeria;Nitrosopumilales;Nitrosopumilaceae;Candidatus_Nitrosopumilus;uncultured_marine_group_I_thaumarchaeote	JN886943.1.914	99.761	0
UNI1168	5	4	3	0	4	2	3	4	4	0	0	7	3	0	0	14	4	2	Archaea;Thaumarchaeota;Nitrososphaeria;Nitrosopumilales;Nitrosopumilaceae;Candidatus_Nitrosopumilus;uncultured_marine_group_I_thaumarchaeote	FJ002862.1.1276	99.761	0
UNI1766	4	20	8	2	5	0	1	1	0	0	0	0	0	0	0	0	5	0	Archaea;Thaumarchaeota;Nitrososphaeria;Nitrosopumilales;Nitrosopumilaceae;Candidatus_Nitrosopumilus;uncultured_marine_group_I_thaumarchaeote	FJ150804.1.1349	98.565	0
UNI603	28	8	16	20	2	0	0	0	0	0	0	7	3	0	0	0	0	0	Archaea;Thaumarchaeota;Nitrososphaeria;Nitrosopumilales;Nitrosopumilaceae;Candidatus_Nitrosopumilus;uncultured_marine_group_I_thaumarchaeote	FJ487499.1.1366	99.282	0
UNI884	20	12	15	13	3	3	7	0	0	0	0	6	2	0	0	4	4	0	Archaea;Thaumarchaeota;Nitrososphaeria;Nitrosopumilales;Nitrosopumilaceae;Candidatus_Nitrosopumilus;uncultured_marine_group_I_thaumarchaeote	FJ487499.1.1366	99.522	0
UNI73	6	12	8	0	3	5	15	16	20	0	0	82	4	0	0	190	61	23	Archaea;Thaumarchaeota;Nitrososphaeria;Nitrosopumilales;Nitrosopumilaceae;Candidatus_Nitrosopumilus;uncultured_marine_group_I_thaumarchaeote	FJ002862.1.1276	99.522	0
UNI936	10	7	2	23	0	0	0	0	0	0	0	5	2	0	0	0	0	0	Archaea;Thaumarchaeota;Nitrososphaeria;Nitrosopumilales;Nitrosopumilaceae;Candidatus_Nitrosopumilus;uncultured_marine_group_I_thaumarchaeote	FJ487499.1.1366	99.761	0
UNI122	12	66	34	7	89	47	41	64	42	0	0	9	4	0	0	22	42	18	Archaea;Thaumarchaeota;Nitrososphaeria;Nitrosopumilales;Nitrosopumilaceae;Candidatus_Nitrosopumilus;uncultured_marine_group_I_thaumarchaeote	JN886943.1.914	99.522	0
UNI422	10	32	10	21	6	6	0	1	0	0	0	5	7	0	0	2	7	0	Archaea;Thaumarchaeota;Nitrososphaeria;Nitrosopumilales;Nitrosopumilaceae;Candidatus_Nitrosopumilus;uncultured_marine_group_I_thaumarchaeote	FJ487526.1.1439	99.761	0
UNI435	9	15	23	5	4	6	11	15	4	0	0	4	2	0	0	6	3	2	Archaea;Thaumarchaeota;Nitrososphaeria;Nitrosopumilales;Nitrosopumilaceae;Candidatus_Nitrosopumilus;uncultured_marine_group_I_thaumarchaeote	FJ150804.1.1349	99.761	0
UNI92	20	75	35	16	85	64	34	57	45	0	0	10	6	0	0	22	36	18	Archaea;Thaumarchaeota;Nitrososphaeria;Nitrosopumilales;Nitrosopumilaceae;Candidatus_Nitrosopumilus;uncultured_marine_group_I_thaumarchaeote	JN886943.1.914	100	0
UNI2201	5	12	6	0	2	1	0	0	0	0	0	0	0	0	0	0	0	0	Archaea;Thaumarchaeota;Nitrososphaeria;Nitrosopumilales;Nitrosopumilaceae;Candidatus_Nitrosopumilus;uncultured_marine_group_I_thaumarchaeote	FJ487540.1.1439	99.282	0
UNI1621	2	18	2	3	3	0	0	0	0	0	0	1	2	0	0	0	0	1	Archaea;Thaumarchaeota;Nitrososphaeria;Nitrosopumilales;Nitrosopumilaceae;Candidatus_Nitrosopumilus;uncultured_marine_group_I_thaumarchaeote	FJ487526.1.1439	99.522	0
UNI136	31	49	39	8	34	18	22	25	0	0	0	22	3	0	0	21	14	4	Archaea;Thaumarchaeota;Nitrososphaeria;Nitrosopumilales;Nitrosopumilaceae;Candidatus_Nitrosopumilus;uncultured_marine_group_I_thaumarchaeote	FJ487499.1.1366	99.761	0
UNI2024	3	5	0	6	1	0	0	0	0	0	0	2	3	0	0	0	0	0	Archaea;Thaumarchaeota;Nitrososphaeria;Nitrosopumilales;Nitrosopumilaceae;Candidatus_Nitrosopumilus;uncultured_marine_group_I_thaumarchaeote	FJ487499.1.1366	99.282	0
UNI128	24	44	43	66	16	12	22	26	5	0	0	32	16	0	0	22	25	2	Archaea;Thaumarchaeota;Nitrososphaeria;Nitrosopumilales;Nitrosopumilaceae;Candidatus_Nitrosopumilus;uncultured_marine_group_I_thaumarchaeote	FJ487540.1.1439	99.761	0
UNI620	17	16	4	22	0	0	1	1	0	0	0	3	6	0	0	0	0	0	Archaea;Thaumarchaeota;Nitrososphaeria;Nitrosopumilales;Nitrosopumilaceae;Candidatus_Nitrosopumilus;uncultured_marine_group_I_thaumarchaeote	FJ487499.1.1366	99.522	0
UNI931	3	22	7	5	5	6	0	0	1	0	0	3	1	0	0	2	1	1	Archaea;Thaumarchaeota;Nitrososphaeria;Nitrosopumilales;Nitrosopumilaceae;Candidatus_Nitrosopumilus;uncultured_marine_group_I_thaumarchaeote	FJ487540.1.1439	99.522	0
UNI3478	5	2	0	3	0	0	0	0	0	0	0	1	3	0	0	0	0	0	Archaea;Thaumarchaeota;Nitrososphaeria;Nitrosopumilales;Nitrosopumilaceae;Candidatus_Nitrosopumilus;uncultured_marine_group_I_thaumarchaeote	FJ487499.1.1366	99.522	0
UNI1892	5	5	1	3	14	1	0	3	1	0	0	0	1	0	0	0	0	0	Archaea;Thaumarchaeota;Nitrososphaeria;Nitrosopumilales;Nitrosopumilaceae;Candidatus_Nitrosopumilus;uncultured_marine_group_I_thaumarchaeote	FJ150804.1.1349	100	0
UNI663	7	17	17	4	4	4	8	8	1	0	0	4	1	0	0	6	5	0	Archaea;Thaumarchaeota;Nitrososphaeria;Nitrosopumilales;Nitrosopumilaceae;Candidatus_Nitrosopumilus;uncultured_marine_group_I_thaumarchaeote	FJ150804.1.1349	99.282	0
UNI3026	24	5	1	0	0	0	0	0	0	0	0	0	0	0	0	0	0	0	Archaea;Thaumarchaeota;Nitrososphaeria;Nitrosopumilales;Nitrosopumilaceae;Candidatus_Nitrosopumilus;uncultured_marine_group_I_thaumarchaeote	FJ487526.1.1439	99.282	0
UNI1281	1	5	2	26	1	0	0	0	0	0	0	4	4	0	0	0	0	0	Archaea;Thaumarchaeota;Nitrososphaeria;Nitrosopumilales;Nitrosopumilaceae;Candidatus_Nitrosopumilus;uncultured_marine_group_I_thaumarchaeote	FJ150804.1.1349	99.761	0
UNI258	4	7	6	1	0	6	4	10	7	0	0	21	0	0	0	54	16	6	Archaea;Thaumarchaeota;Nitrososphaeria;Nitrosopumilales;Nitrosopumilaceae;Candidatus_Nitrosopumilus;uncultured_marine_group_I_thaumarchaeote	FJ002862.1.1276	100	0
UNI590	4	27	14	15	12	3	9	7	1	0	0	5	4	0	0	6	7	1	Archaea;Thaumarchaeota;Nitrososphaeria;Nitrosopumilales;Nitrosopumilaceae;Candidatus_Nitrosopumilus;uncultured_marine_group_I_thaumarchaeote	FJ487540.1.1439	99.761	0
UNI175	5	10	5	3	4	6	7	11	11	0	0	46	6	0	0	69	26	14	Archaea;Thaumarchaeota;Nitrososphaeria;Nitrosopumilales;Nitrosopumilaceae;Candidatus_Nitrosopumilus;uncultured_marine_group_I_thaumarchaeote	FJ002862.1.1276	99.761	0
UNI137	19	34	49	8	22	7	21	13	4	0	0	26	7	0	0	29	28	4	Archaea;Thaumarchaeota;Nitrososphaeria;Nitrosopumilales;Nitrosopumilaceae;Candidatus_Nitrosopumilus;uncultured_marine_group_I_thaumarchaeote	FJ150804.1.1349	99.282	0
UNI402	11	20	29	9	14	3	15	19	1	0	0	13	9	0	0	6	10	1	Archaea;Thaumarchaeota;Nitrososphaeria;Nitrosopumilales;Nitrosopumilaceae;Candidatus_Nitrosopumilus;uncultured_marine_group_I_thaumarchaeote	FJ487540.1.1439	99.522	0
UNI1051	3	3	4	24	2	0	1	1	0	0	0	4	11	0	0	0	0	0	Archaea;Thaumarchaeota;Nitrososphaeria;Nitrosopumilales;Nitrosopumilaceae;Candidatus_Nitrosopumilus;uncultured_marine_group_I_thaumarchaeote	FJ150804.1.1349	99.522	0
UNI1694	6	4	5	6	13	2	1	4	1	0	0	1	2	0	0	1	1	0	Archaea;Thaumarchaeota;Nitrososphaeria;Nitrosopumilales;Nitrosopumilaceae;Candidatus_Nitrosopumilus;uncultured_marine_group_I_thaumarchaeote	FJ487526.1.1439	99.282	0
UNI2559	1	7	6	4	0	0	6	1	0	0	0	1	3	0	0	2	2	0	Archaea;Thaumarchaeota;Nitrososphaeria;Nitrosopumilales;Nitrosopumilaceae;Candidatus_Nitrosopumilus;uncultured_marine_group_I_thaumarchaeote	FJ487499.1.1366	98.804	0
UNI376	8	28	22	5	14	4	20	15	5	0	0	6	7	0	0	3	6	0	Archaea;Thaumarchaeota;Nitrososphaeria;Nitrosopumilales;Nitrosopumilaceae;Candidatus_Nitrosopumilus;uncultured_marine_group_I_thaumarchaeote	FJ150804.1.1349	99.522	0
UNI1773	1	2	1	11	3	0	1	1	0	0	0	3	6	0	0	0	0	0	Archaea;Thaumarchaeota;Nitrososphaeria;Nitrosopumilales;Nitrosopumilaceae;Candidatus_Nitrosopumilus;uncultured_marine_group_I_thaumarchaeote	FJ150804.1.1349	99.522	0
UNI266	7	48	21	3	50	19	22	33	29	0	0	7	1	0	0	10	8	8	Archaea;Thaumarchaeota;Nitrososphaeria;Nitrosopumilales;Nitrosopumilaceae;Candidatus_Nitrosopumilus;uncultured_marine_group_I_thaumarchaeote	JN886943.1.914	99.761	0
UNI164	5	33	5	153	0	0	1	2	0	0	0	5	10	0	0	0	0	0	Archaea;Thaumarchaeota;Nitrososphaeria;Nitrosopumilales;Nitrosopumilaceae;Candidatus_Nitrosopumilus;uncultured_marine_group_I_thaumarchaeote	FJ487523.1.1423	100	0
UNI237	16	25	32	3	10	7	18	14	3	0	0	15	6	0	0	17	21	2	Archaea;Thaumarchaeota;Nitrososphaeria;Nitrosopumilales;Nitrosopumilaceae;Candidatus_Nitrosopumilus;uncultured_marine_group_I_thaumarchaeote	FJ150804.1.1349	99.522	0
UNI470	2	18	7	32	0	2	0	2	18	0	0	0	9	0	0	0	0	6	Archaea;Thaumarchaeota;Nitrososphaeria;Nitrosopumilales;Nitrosopumilaceae;Candidatus_Nitrosopumilus;uncultured_marine_group_I_thaumarchaeote	JN886943.1.914	99.522	0
UNI151	3	44	15	111	0	0	1	0	0	0	0	9	43	0	0	1	1	0	Archaea;Thaumarchaeota;Nitrososphaeria;Nitrosopumilales;Nitrosopumilaceae;Candidatus_Nitrosopumilus;uncultured_marine_group_I_thaumarchaeote	FJ487523.1.1423	99.761	0
UNI1702	1	7	3	0	0	3	0	7	1	0	0	2	0	0	0	4	1	3	Archaea;Thaumarchaeota;Nitrososphaeria;Nitrosopumilales;Nitrosopumilaceae;Candidatus_Nitrosopumilus;uncultured_marine_group_I_thaumarchaeote	FJ487477.1.1375	99.282	0
UNI2001	7	5	7	0	0	2	7	2	0	0	0	0	1	0	0	1	7	0	Archaea;Thaumarchaeota;Nitrososphaeria;Nitrosopumilales;Nitrosopumilaceae;Candidatus_Nitrosopumilus;uncultured_marine_group_I_thaumarchaeote	FJ487499.1.1366	99.282	0
UNI930	2	3	7	0	0	6	2	6	10	0	0	9	0	0	0	15	11	7	Archaea;Thaumarchaeota;Nitrososphaeria;Nitrosopumilales;Nitrosopumilaceae;Candidatus_Nitrosopumilus;uncultured_marine_group_I_thaumarchaeote	FJ487477.1.1375	99.282	0
UNI478	10	17	16	0	7	5	10	8	0	0	0	1	0	0	0	6	5	0	Archaea;Thaumarchaeota;Nitrososphaeria;Nitrosopumilales;Nitrosopumilaceae;Candidatus_Nitrosopumilus;uncultured_marine_group_I_thaumarchaeote	FJ487499.1.1366	99.522	0
UNI472	3	17	12	32	0	0	0	0	0	0	0	6	10	0	0	0	0	0	Archaea;Thaumarchaeota;Nitrososphaeria;Nitrosopumilales;Nitrosopumilaceae;Candidatus_Nitrosopumilus;uncultured_marine_group_I_thaumarchaeote	FJ487523.1.1423	99.522	0
UNI1979	2	6	10	9	2	1	3	12	14	0	1	0	0	0	0	0	1	7	Archaea;Thaumarchaeota;Nitrososphaeria;Nitrosopumilales;Nitrosopumilaceae;Candidatus_Nitrosopumilus;uncultured_marine_group_I_thaumarchaeote	JN886943.1.914	99.522	0
UNI377	4	32	14	24	0	1	0	3	40	0	0	3	21	0	0	0	2	31	Archaea;Thaumarchaeota;Nitrososphaeria;Nitrosopumilales;Nitrosopumilaceae;Candidatus_Nitrosopumilus;uncultured_marine_group_I_thaumarchaeote	JN886943.1.914	99.282	0
UNI138	2	1	38	0	0	0	47	21	3	0	0	42	4	0	0	42	43	0	Archaea;Thaumarchaeota;Nitrososphaeria;Nitrosopumilales;Nitrosopumilaceae;Candidatus_Nitrosopumilus;uncultured_marine_group_I_thaumarchaeote	FJ487486.1.1370	99.522	0
UNI295	1	0	9	0	1	1	20	19	1	0	0	23	0	0	0	39	39	1	Archaea;Thaumarchaeota;Nitrososphaeria;Nitrosopumilales;Nitrosopumilaceae;Candidatus_Nitrosopumilus;uncultured_marine_group_I_thaumarchaeote	FJ487477.1.1375	99.761	0
UNI1225	9	5	13	1	23	3	1	4	4	0	0	1	3	0	0	1	0	0	Archaea;Thaumarchaeota;Nitrososphaeria;Nitrosopumilales;Nitrosopumilaceae;Candidatus_Nitrosopumilus;uncultured_marine_group_I_thaumarchaeote	FJ150804.1.1349	99.522	0
UNI3085	1	6	6	1	0	2	1	3	0	0	0	1	0	0	0	1	4	3	Archaea;Thaumarchaeota;Nitrososphaeria;Nitrosopumilales;Nitrosopumilaceae;Candidatus_Nitrosopumilus;uncultured_marine_group_I_thaumarchaeote	FJ487483.1.1372	99.522	0
UNI405	10	8	6	0	0	4	6	13	9	0	0	12	0	0	0	36	5	6	Archaea;Thaumarchaeota;Nitrososphaeria;Nitrosopumilales;Nitrosopumilaceae;Candidatus_Nitrosopumilus;uncultured_marine_group_I_thaumarchaeote	FJ002862.1.1276	99.522	0
UNI3532	2	0	3	9	0	0	0	0	0	0	0	0	0	0	0	0	0	0	Archaea;Thaumarchaeota;Nitrososphaeria;Nitrosopumilales;Nitrosopumilaceae;Candidatus_Nitrosopumilus;uncultured_marine_group_I_thaumarchaeote	FJ487526.1.1439	99.761	0
UNI153	3	27	7	143	0	0	0	2	0	0	0	3	27	0	0	0	0	0	Archaea;Thaumarchaeota;Nitrososphaeria;Nitrosopumilales;Nitrosopumilaceae;Candidatus_Nitrosopumilus;uncultured_marine_group_I_thaumarchaeote	FJ487523.1.1423	99.761	0
UNI3014	6	0	1	0	2	0	1	4	13	0	0	4	0	0	0	0	0	10	Archaea;Thaumarchaeota;Nitrososphaeria;Nitrosopumilales;Nitrosopumilaceae;Candidatus_Nitrosopumilus;uncultured_marine_group_I_thaumarchaeote	FJ487491.1.1369	99.043	0
UNI3281	5	0	0	0	2	0	1	1	19	0	0	2	0	0	0	0	1	7	Archaea;Thaumarchaeota;Nitrososphaeria;Nitrosopumilales;Nitrosopumilaceae;Candidatus_Nitrosopumilus;uncultured_marine_group_I_thaumarchaeote	FJ487491.1.1369	98.804	0
UNI414	4	23	11	24	0	1	0	7	29	0	0	0	17	0	0	0	0	5	Archaea;Thaumarchaeota;Nitrososphaeria;Nitrosopumilales;Nitrosopumilaceae;Candidatus_Nitrosopumilus;uncultured_marine_group_I_thaumarchaeote	JN886943.1.914	99.522	0
UNI1534	2	15	12	4	0	0	6	3	0	0	0	5	2	0	0	7	5	0	Archaea;Thaumarchaeota;Nitrososphaeria;Nitrosopumilales;Nitrosopumilaceae;Candidatus_Nitrosopumilus;uncultured_marine_group_I_thaumarchaeote	FJ487499.1.1366	98.804	0
UNI796	6	28	3	6	14	4	2	1	1	0	0	1	2	0	0	1	0	3	Archaea;Thaumarchaeota;Nitrososphaeria;Nitrosopumilales;Nitrosopumilaceae;Candidatus_Nitrosopumilus;uncultured_marine_group_I_thaumarchaeote	FJ487540.1.1439	99.522	0
UNI1697	2	9	3	2	6	1	1	5	2	0	0	1	0	0	0	1	2	0	Archaea;Thaumarchaeota;Nitrososphaeria;Nitrosopumilales;Nitrosopumilaceae;Candidatus_Nitrosopumilus;uncultured_marine_group_I_thaumarchaeote	FJ150804.1.1349	99.522	0
UNI927	7	9	8	1	17	5	6	7	0	0	0	0	0	0	0	2	4	0	Archaea;Thaumarchaeota;Nitrososphaeria;Nitrosopumilales;Nitrosopumilaceae;Candidatus_Nitrosopumilus;uncultured_marine_group_I_thaumarchaeote	FJ487499.1.1366	99.761	0
UNI3191	4	0	13	2	0	0	1	2	0	0	0	2	0	0	0	0	3	0	Archaea;Thaumarchaeota;Nitrososphaeria;Nitrosopumilales;Nitrosopumilaceae;Candidatus_Nitrosopumilus;uncultured_marine_group_I_thaumarchaeote	FJ487483.1.1372	99.043	0
UNI206	1	0	8	1	1	1	20	26	4	0	0	46	0	0	0	43	53	2	Archaea;Thaumarchaeota;Nitrososphaeria;Nitrosopumilales;Nitrosopumilaceae;Candidatus_Nitrosopumilus;uncultured_marine_group_I_thaumarchaeote	FJ487477.1.1375	99.522	0
UNI1960	6	6	1	12	3	0	0	0	0	0	0	2	2	0	0	0	1	0	Archaea;Thaumarchaeota;Nitrososphaeria;Nitrosopumilales;Nitrosopumilaceae;Candidatus_Nitrosopumilus;uncultured_marine_group_I_thaumarchaeote	FJ487526.1.1439	99.282	0
UNI1110	2	11	19	7	0	1	1	21	30	0	0	0	5	0	0	3	0	17	Archaea;Thaumarchaeota;Nitrososphaeria;Nitrosopumilales;Nitrosopumilaceae;Candidatus_Nitrosopumilus;uncultured_marine_group_I_thaumarchaeote	JN886943.1.914	99.282	0
UNI3059	3	0	1	0	2	11	3	3	0	0	0	0	0	0	0	11	2	1	Archaea;Thaumarchaeota;Nitrososphaeria;Nitrosopumilales;Nitrosopumilaceae;Candidatus_Nitrosopumilus;uncultured_marine_group_I_thaumarchaeote	FJ487499.1.1366	99.043	0
UNI1383	4	13	8	0	0	0	10	5	0	0	0	6	6	0	0	10	3	1	Archaea;Thaumarchaeota;Nitrososphaeria;Nitrosopumilales;Nitrosopumilaceae;Candidatus_Nitrosopumilus;uncultured_marine_group_I_thaumarchaeote	FJ487499.1.1366	98.565	0
UNI3260	4	11	1	5	3	0	0	0	0	0	0	0	0	0	0	0	0	0	Archaea;Thaumarchaeota;Nitrososphaeria;Nitrosopumilales;Nitrosopumilaceae;Candidatus_Nitrosopumilus;uncultured_marine_group_I_thaumarchaeote	FJ487526.1.1439	99.761	0
UNI2770	6	17	13	0	22	13	10	17	3	0	1	5	1	0	0	14	4	6	Archaea;Thaumarchaeota;Nitrososphaeria;Nitrosopumilales;Nitrosopumilaceae;Candidatus_Nitrosopumilus;uncultured_marine_group_I_thaumarchaeote	FJ487491.1.1369	99.761	0
UNI1285	2	14	11	13	1	1	1	1	0	0	0	1	4	0	0	0	0	0	Archaea;Thaumarchaeota;Nitrososphaeria;Nitrosopumilales;Nitrosopumilaceae;Candidatus_Nitrosopumilus;uncultured_marine_group_I_thaumarchaeote	FJ487526.1.1439	100	0
UNI3143	1	6	2	1	0	3	0	0	3	0	0	1	0	0	0	0	0	1	Archaea;Thaumarchaeota;Nitrososphaeria;Nitrosopumilales;Nitrosopumilaceae;Candidatus_Nitrosopumilus;uncultured_marine_group_I_thaumarchaeote	FJ487540.1.1439	99.522	0
UNI2768	2	17	1	2	1	0	0	1	0	0	0	1	0	0	0	0	1	0	Archaea;Thaumarchaeota;Nitrososphaeria;Nitrosopumilales;Nitrosopumilaceae;Candidatus_Nitrosopumilus;uncultured_marine_group_I_thaumarchaeote	FJ150804.1.1349	99.043	0
UNI3312	2	2	0	0	0	0	4	0	0	0	0	0	0	0	0	0	3	0	Archaea;Thaumarchaeota;Nitrososphaeria;Nitrosopumilales;Nitrosopumilaceae;Candidatus_Nitrosopumilus;uncultured_marine_group_I_thaumarchaeote	FJ487499.1.1366	99.043	0
UNI1207	1	6	10	3	9	1	1	4	1	0	0	4	0	0	0	2	3	0	Archaea;Thaumarchaeota;Nitrososphaeria;Nitrosopumilales;Nitrosopumilaceae;Candidatus_Nitrosopumilus;uncultured_marine_group_I_thaumarchaeote	FJ487526.1.1439	99.522	0
UNI353	1	0	3	0	0	0	8	8	0	0	0	12	0	0	0	28	57	1	Archaea;Thaumarchaeota;Nitrososphaeria;Nitrosopumilales;Nitrosopumilaceae;Candidatus_Nitrosopumilus;uncultured_marine_group_I_thaumarchaeote	FJ487477.1.1375	99.043	0
UNI1951	1	10	5	1	2	0	0	2	0	0	0	0	0	0	0	0	6	0	Archaea;Thaumarchaeota;Nitrososphaeria;Nitrosopumilales;Nitrosopumilaceae;Candidatus_Nitrosopumilus;uncultured_marine_group_I_thaumarchaeote	FJ150804.1.1349	98.804	0
UNI625	1	12	15	11	7	3	3	13	3	0	0	2	4	0	0	9	5	0	Archaea;Thaumarchaeota;Nitrososphaeria;Nitrosopumilales;Nitrosopumilaceae;Candidatus_Nitrosopumilus;uncultured_marine_group_I_thaumarchaeote	FJ487526.1.1439	99.282	0
UNI3253	1	6	5	0	0	0	0	0	0	0	0	0	0	0	0	0	5	0	Archaea;Thaumarchaeota;Nitrososphaeria;Nitrosopumilales;Nitrosopumilaceae;Candidatus_Nitrosopumilus;uncultured_marine_group_I_thaumarchaeote	FJ150804.1.1349	98.804	0
UNI645	0	18	4	35	0	0	0	0	0	0	0	1	1	0	0	0	1	0	Archaea;Thaumarchaeota;Nitrososphaeria;Nitrosopumilales;Nitrosopumilaceae;Candidatus_Nitrosopumilus;uncultured_marine_group_I_thaumarchaeote	FJ487523.1.1423	99.761	0
UNI989	0	2	2	0	0	3	0	5	7	0	0	7	0	0	0	9	9	5	Archaea;Thaumarchaeota;Nitrososphaeria;Nitrosopumilales;Nitrosopumilaceae;Candidatus_Nitrosopumilus;uncultured_marine_group_I_thaumarchaeote	FJ487477.1.1375	99.522	0
UNI375	0	3	19	0	0	5	10	18	2	0	0	15	0	0	0	19	28	7	Archaea;Thaumarchaeota;Nitrososphaeria;Nitrosopumilales;Nitrosopumilaceae;Candidatus_Nitrosopumilus;uncultured_marine_group_I_thaumarchaeote	FJ487477.1.1375	100	0
UNI3042	0	10	2	2	0	0	1	1	0	0	0	0	1	0	0	4	0	0	Archaea;Thaumarchaeota;Nitrososphaeria;Nitrosopumilales;Nitrosopumilaceae;Candidatus_Nitrosopumilus;uncultured_marine_group_I_thaumarchaeote	FJ487500.1.1366	99.282	0
UNI51	0	1	37	0	8	1	91	128	16	0	0	21	0	0	0	146	138	12	Archaea;Thaumarchaeota;Nitrososphaeria;Nitrosopumilales;Nitrosopumilaceae;Candidatus_Nitrosopumilus;uncultured_marine_group_I_thaumarchaeote	FJ487472.1.1378	99.282	0
UNI118	0	42	12	133	0	0	1	1	0	0	0	12	57	0	0	0	3	0	Archaea;Thaumarchaeota;Nitrososphaeria;Nitrosopumilales;Nitrosopumilaceae;Candidatus_Nitrosopumilus;uncultured_marine_group_I_thaumarchaeote	FJ487523.1.1423	99.522	0
UNI643	0	2	9	0	0	1	8	11	6	0	0	11	0	0	0	14	9	4	Archaea;Thaumarchaeota;Nitrososphaeria;Nitrosopumilales;Nitrosopumilaceae;Candidatus_Nitrosopumilus;uncultured_marine_group_I_thaumarchaeote	FJ487477.1.1375	99.522	0
UNI199	0	3	14	0	0	2	59	62	0	0	0	6	0	0	0	27	44	0	Archaea;Thaumarchaeota;Nitrososphaeria;Nitrosopumilales;Nitrosopumilaceae;Candidatus_Nitrosopumilus;uncultured_marine_group_I_thaumarchaeote	FJ487525.1.1439	99.522	0
UNI2460	0	3	0	0	0	0	12	2	1	0	0	7	0	0	0	2	12	0	Archaea;Thaumarchaeota;Nitrososphaeria;Nitrosopumilales;Nitrosopumilaceae;Candidatus_Nitrosopumilus;uncultured_marine_group_I_thaumarchaeote	FJ487484.1.1371	99.045	0
UNI129	0	6	18	0	0	1	23	33	4	0	0	55	0	0	0	74	63	13	Archaea;Thaumarchaeota;Nitrososphaeria;Nitrosopumilales;Nitrosopumilaceae;Candidatus_Nitrosopumilus;uncultured_marine_group_I_thaumarchaeote	FJ487477.1.1375	99.522	0
UNI1903	0	1	2	0	0	0	3	6	0	0	0	4	0	0	0	7	6	0	Archaea;Thaumarchaeota;Nitrososphaeria;Nitrosopumilales;Nitrosopumilaceae;Candidatus_Nitrosopumilus;uncultured_marine_group_I_thaumarchaeote	FJ487498.1.1367	99.761	0
UNI2939	0	1	3	0	0	3	2	0	0	0	0	2	0	0	0	0	2	0	Archaea;Thaumarchaeota;Nitrososphaeria;Nitrosopumilales;Nitrosopumilaceae;Candidatus_Nitrosopumilus;uncultured_marine_group_I_thaumarchaeote	FJ487499.1.1366	99.282	0
UNI91	0	1	21	0	2	4	95	99	0	0	0	16	0	0	0	64	69	0	Archaea;Thaumarchaeota;Nitrososphaeria;Nitrosopumilales;Nitrosopumilaceae;Candidatus_Nitrosopumilus;uncultured_marine_group_I_thaumarchaeote	FJ487525.1.1439	100	0
UNI2646	0	3	6	4	0	0	12	1	0	0	0	4	6	0	0	8	7	1	Archaea;Thaumarchaeota;Nitrososphaeria;Nitrosopumilales;Nitrosopumilaceae;Candidatus_Nitrosopumilus;uncultured_marine_group_I_thaumarchaeote	FJ487484.1.1371	99.284	0
UNI647	0	1	10	0	0	0	11	15	2	0	0	13	1	0	0	10	10	0	Archaea;Thaumarchaeota;Nitrososphaeria;Nitrosopumilales;Nitrosopumilaceae;Candidatus_Nitrosopumilus;uncultured_marine_group_I_thaumarchaeote	FJ487486.1.1370	100	0
UNI549	0	2	6	0	0	0	7	5	0	0	0	18	0	0	0	19	21	4	Archaea;Thaumarchaeota;Nitrososphaeria;Nitrosopumilales;Nitrosopumilaceae;Candidatus_Nitrosopumilus;uncultured_marine_group_I_thaumarchaeote	FJ487498.1.1367	99.522	0
UNI209	0	2	29	0	0	3	12	29	4	0	0	36	0	0	0	53	44	6	Archaea;Thaumarchaeota;Nitrososphaeria;Nitrosopumilales;Nitrosopumilaceae;Candidatus_Nitrosopumilus;uncultured_marine_group_I_thaumarchaeote	FJ487477.1.1375	99.761	0
UNI1077	0	5	1	0	3	0	2	11	0	0	0	1	0	0	0	9	15	0	Archaea;Thaumarchaeota;Nitrososphaeria;Nitrosopumilales;Nitrosopumilaceae;Candidatus_Nitrosopumilus;uncultured_marine_group_I_thaumarchaeote	FJ487486.1.1370	99.282	0
UNI1449	0	2	13	1	0	0	15	12	0	0	0	3	0	0	0	6	3	0	Archaea;Thaumarchaeota;Nitrososphaeria;Nitrosopumilales;Nitrosopumilaceae;Candidatus_Nitrosopumilus;uncultured_marine_group_I_thaumarchaeote	FJ487486.1.1370	99.761	0
UNI2176	0	2	2	0	0	0	4	9	3	0	0	5	0	0	0	8	3	0	Archaea;Thaumarchaeota;Nitrososphaeria;Nitrosopumilales;Nitrosopumilaceae;Candidatus_Nitrosopumilus;uncultured_marine_group_I_thaumarchaeote	FJ487477.1.1375	99.761	0
UNI1215	0	3	5	0	0	1	2	9	0	0	0	0	0	0	0	3	10	0	Archaea;Thaumarchaeota;Nitrososphaeria;Nitrosopumilales;Nitrosopumilaceae;Candidatus_Nitrosopumilus;uncultured_marine_group_I_thaumarchaeote	FJ487486.1.1370	99.522	0
UNI501	0	1	8	0	0	5	39	42	1	0	0	2	0	0	0	7	20	0	Archaea;Thaumarchaeota;Nitrososphaeria;Nitrosopumilales;Nitrosopumilaceae;Candidatus_Nitrosopumilus;uncultured_marine_group_I_thaumarchaeote	FJ487525.1.1439	99.761	0
UNI336	0	3	22	0	1	2	22	23	0	0	0	23	0	0	0	22	17	0	Archaea;Thaumarchaeota;Nitrososphaeria;Nitrosopumilales;Nitrosopumilaceae;Candidatus_Nitrosopumilus;uncultured_marine_group_I_thaumarchaeote	FJ487486.1.1370	99.761	0
UNI953	0	2	16	0	4	2	12	11	0	0	0	9	0	0	0	6	5	0	Archaea;Thaumarchaeota;Nitrososphaeria;Nitrosopumilales;Nitrosopumilaceae;Candidatus_Nitrosopumilus;uncultured_marine_group_I_thaumarchaeote	FJ487486.1.1370	99.522	0
UNI34	0	2	25	0	0	5	187	132	0	0	0	25	0	0	0	143	194	0	Archaea;Thaumarchaeota;Nitrososphaeria;Nitrosopumilales;Nitrosopumilaceae;Candidatus_Nitrosopumilus;uncultured_marine_group_I_thaumarchaeote	FJ487525.1.1439	99.761	0
UNI22	0	1	39	0	0	7	227	148	1	0	0	34	0	0	0	195	288	0	Archaea;Thaumarchaeota;Nitrososphaeria;Nitrosopumilales;Nitrosopumilaceae;Candidatus_Nitrosopumilus;uncultured_marine_group_I_thaumarchaeote	FJ487525.1.1439	99.522	0
UNI1966	0	0	28	0	0	0	6	20	0	0	0	9	0	0	0	3	7	0	Archaea;Thaumarchaeota;Nitrososphaeria;Nitrosopumilales;Nitrosopumilaceae;Candidatus_Nitrosopumilus;uncultured_marine_group_I_thaumarchaeote	FJ487486.1.1370	99.043	0
UNI96	0	0	25	0	0	3	20	21	3	0	0	65	0	0	0	84	127	5	Archaea;Thaumarchaeota;Nitrososphaeria;Nitrosopumilales;Nitrosopumilaceae;Candidatus_Nitrosopumilus;uncultured_marine_group_I_thaumarchaeote	FJ487477.1.1375	99.522	0
UNI74	0	0	19	1	1	1	25	27	3	0	0	81	0	0	0	103	166	3	Archaea;Thaumarchaeota;Nitrososphaeria;Nitrosopumilales;Nitrosopumilaceae;Candidatus_Nitrosopumilus;uncultured_marine_group_I_thaumarchaeote	FJ487477.1.1375	99.282	0
UNI188	0	0	11	1	5	2	58	61	8	0	0	11	0	0	0	60	33	9	Archaea;Thaumarchaeota;Nitrososphaeria;Nitrosopumilales;Nitrosopumilaceae;Candidatus_Nitrosopumilus;uncultured_marine_group_I_thaumarchaeote	FJ487472.1.1378	99.761	0
UNI308	0	0	16	0	0	3	20	14	5	0	0	24	0	0	0	35	25	5	Archaea;Thaumarchaeota;Nitrososphaeria;Nitrosopumilales;Nitrosopumilaceae;Candidatus_Nitrosopumilus;uncultured_marine_group_I_thaumarchaeote	FJ487477.1.1375	99.761	0
UNI72	0	0	23	0	3	8	142	85	0	0	0	9	0	0	0	82	97	0	Archaea;Thaumarchaeota;Nitrososphaeria;Nitrosopumilales;Nitrosopumilaceae;Candidatus_Nitrosopumilus;uncultured_marine_group_I_thaumarchaeote	FJ487525.1.1439	99.761	0
UNI762	0	0	8	1	0	1	1	2	2	0	0	21	6	0	0	6	7	1	Archaea;Thaumarchaeota;Nitrososphaeria;Nitrosopumilales;Nitrosopumilaceae;Candidatus_Nitrosopumilus;uncultured_marine_group_I_thaumarchaeote	FJ002862.1.1276	99.282	0
UNI321	0	0	7	0	5	2	43	51	10	0	0	0	0	0	0	29	26	7	Archaea;Thaumarchaeota;Nitrososphaeria;Nitrosopumilales;Nitrosopumilaceae;Candidatus_Nitrosopumilus;uncultured_marine_group_I_thaumarchaeote	FJ487472.1.1378	99.282	0
UNI1659	0	0	4	0	0	1	4	1	0	0	0	7	0	0	0	2	8	2	Archaea;Thaumarchaeota;Nitrososphaeria;Nitrosopumilales;Nitrosopumilaceae;Candidatus_Nitrosopumilus;uncultured_marine_group_I_thaumarchaeote	FJ487498.1.1367	99.761	0
UNI2531	0	0	30	1	0	0	5	13	0	0	0	11	0	0	0	3	7	0	Archaea;Thaumarchaeota;Nitrososphaeria;Nitrosopumilales;Nitrosopumilaceae;Candidatus_Nitrosopumilus;uncultured_marine_group_I_thaumarchaeote	FJ487486.1.1370	99.282	0
UNI75	0	0	41	0	6	1	96	127	9	0	0	29	0	0	0	121	101	10	Archaea;Thaumarchaeota;Nitrososphaeria;Nitrosopumilales;Nitrosopumilaceae;Candidatus_Nitrosopumilus;uncultured_marine_group_I_thaumarchaeote	FJ487472.1.1378	99.522	0
UNI1134	0	0	11	0	0	1	22	24	7	0	0	10	0	0	0	8	7	7	Archaea;Thaumarchaeota;Nitrososphaeria;Nitrosopumilales;Nitrosopumilaceae;Candidatus_Nitrosopumilus;uncultured_marine_group_I_thaumarchaeote	FJ487480.1.1374	99.282	0
UNI577	0	0	5	0	0	0	8	14	2	0	0	17	0	0	0	24	30	1	Archaea;Thaumarchaeota;Nitrososphaeria;Nitrosopumilales;Nitrosopumilaceae;Candidatus_Nitrosopumilus;uncultured_marine_group_I_thaumarchaeote	FJ487477.1.1375	99.282	0
UNI714	0	0	7	0	3	1	21	28	7	0	0	4	0	0	0	12	10	1	Archaea;Thaumarchaeota;Nitrososphaeria;Nitrosopumilales;Nitrosopumilaceae;Candidatus_Nitrosopumilus;uncultured_marine_group_I_thaumarchaeote	FJ487472.1.1378	99.522	0
UNI1462	0	0	11	1	0	0	2	9	10	0	0	3	0	0	0	5	4	5	Archaea;Thaumarchaeota;Nitrososphaeria;Nitrosopumilales;Nitrosopumilaceae;Candidatus_Nitrosopumilus;uncultured_marine_group_I_thaumarchaeote	FJ487499.1.1366	99.282	0
UNI2883	0	0	3	0	0	0	3	3	0	0	0	1	0	0	0	9	18	0	Archaea;Thaumarchaeota;Nitrososphaeria;Nitrosopumilales;Nitrosopumilaceae;Candidatus_Nitrosopumilus;uncultured_marine_group_I_thaumarchaeote	FJ487477.1.1375	98.804	0
UNI141	0	0	14	0	11	1	74	79	5	0	0	15	0	0	0	58	38	2	Archaea;Thaumarchaeota;Nitrososphaeria;Nitrosopumilales;Nitrosopumilaceae;Candidatus_Nitrosopumilus;uncultured_marine_group_I_thaumarchaeote	FJ487472.1.1378	99.522	0
UNI1561	0	0	6	0	0	0	1	5	1	0	0	6	0	0	0	10	4	1	Archaea;Thaumarchaeota;Nitrososphaeria;Nitrosopumilales;Nitrosopumilaceae;Candidatus_Nitrosopumilus;uncultured_marine_group_I_thaumarchaeote	FJ487498.1.1367	100	0
UNI1233	0	0	5	0	1	1	10	5	0	0	0	6	0	0	0	7	14	0	Archaea;Thaumarchaeota;Nitrososphaeria;Nitrosopumilales;Nitrosopumilaceae;Candidatus_Nitrosopumilus;uncultured_marine_group_I_thaumarchaeote	FJ487477.1.1375	99.522	0
UNI2081	0	0	2	0	0	2	2	1	5	0	0	1	0	0	0	3	4	2	Archaea;Thaumarchaeota;Nitrososphaeria;Nitrosopumilales;Nitrosopumilaceae;Candidatus_Nitrosopumilus;uncultured_marine_group_I_thaumarchaeote	FJ487477.1.1375	99.522	0
UNI2874	0	0	1	0	0	0	4	1	1	0	0	0	0	0	0	1	9	0	Archaea;Thaumarchaeota;Nitrososphaeria;Nitrosopumilales;Nitrosopumilaceae;Candidatus_Nitrosopumilus;uncultured_marine_group_I_thaumarchaeote	FJ487477.1.1375	99.282	0
UNI712	0	0	5	0	0	0	4	3	0	0	0	2	0	0	0	11	34	0	Archaea;Thaumarchaeota;Nitrososphaeria;Nitrosopumilales;Nitrosopumilaceae;Candidatus_Nitrosopumilus;uncultured_marine_group_I_thaumarchaeote	FJ487477.1.1375	99.282	0
UNI1670	0	0	6	1	0	0	0	3	11	0	0	0	0	0	0	7	1	3	Archaea;Thaumarchaeota;Nitrososphaeria;Nitrosopumilales;Nitrosopumilaceae;Candidatus_Nitrosopumilus;uncultured_marine_group_I_thaumarchaeote	FJ487499.1.1366	99.043	0
UNI2755	0	0	3	0	0	2	9	21	8	0	1	8	0	0	0	4	7	4	Archaea;Thaumarchaeota;Nitrososphaeria;Nitrosopumilales;Nitrosopumilaceae;Candidatus_Nitrosopumilus;uncultured_marine_group_I_thaumarchaeote	FJ487480.1.1374	99.522	0
UNI2878	0	0	4	0	0	0	4	2	2	0	0	0	0	0	0	0	1	1	Archaea;Thaumarchaeota;Nitrososphaeria;Nitrosopumilales;Nitrosopumilaceae;Candidatus_Nitrosopumilus;uncultured_marine_group_I_thaumarchaeote	FJ487499.1.1366	99.522	0
UNI2753	0	0	5	0	0	0	3	5	3	0	0	2	0	0	0	3	2	1	Archaea;Thaumarchaeota;Nitrososphaeria;Nitrosopumilales;Nitrosopumilaceae;Candidatus_Nitrosopumilus;uncultured_marine_group_I_thaumarchaeote	FJ487499.1.1366	99.282	0
UNI2712	0	0	1	0	0	0	0	2	0	0	0	0	0	0	0	20	10	0	Archaea;Thaumarchaeota;Nitrososphaeria;Nitrosopumilales;Nitrosopumilaceae;Candidatus_Nitrosopumilus;uncultured_marine_group_I_thaumarchaeote	FJ487477.1.1375	98.804	0
UNI3453	0	0	1	0	2	0	6	5	38	0	0	8	0	0	0	3	16	24	Archaea;Thaumarchaeota;Nitrososphaeria;Nitrosopumilales;Nitrosopumilaceae;Candidatus_Nitrosopumilus;uncultured_marine_group_I_thaumarchaeote	FJ002862.1.1276	98.325	0
UNI1736	0	0	3	0	0	0	1	7	0	0	0	1	0	0	0	18	24	0	Archaea;Thaumarchaeota;Nitrososphaeria;Nitrosopumilales;Nitrosopumilaceae;Candidatus_Nitrosopumilus;uncultured_marine_group_I_thaumarchaeote	FJ487477.1.1375	98.565	0
UNI1860	0	0	0	3	0	0	2	1	0	0	0	10	5	0	0	0	0	1	Archaea;Thaumarchaeota;Nitrososphaeria;Nitrosopumilales;Nitrosopumilaceae;Candidatus_Nitrosopumilus;uncultured_marine_group_I_thaumarchaeote	FJ002862.1.1276	99.761	0
UNI2051	0	0	0	0	3	0	2	3	0	0	0	0	0	0	0	4	6	0	Archaea;Thaumarchaeota;Nitrososphaeria;Nitrosopumilales;Nitrosopumilaceae;Candidatus_Nitrosopumilus;uncultured_marine_group_I_thaumarchaeote	FJ487486.1.1370	99.761	0
UNI2053	0	0	0	0	0	3	2	4	3	0	0	3	0	0	0	3	0	3	Archaea;Thaumarchaeota;Nitrososphaeria;Nitrosopumilales;Nitrosopumilaceae;Candidatus_Nitrosopumilus;uncultured_marine_group_I_thaumarchaeote	FJ487477.1.1375	99.761	0
UNI383	0	0	0	0	0	0	10	9	0	0	0	9	0	0	0	27	47	0	Archaea;Thaumarchaeota;Nitrososphaeria;Nitrosopumilales;Nitrosopumilaceae;Candidatus_Nitrosopumilus;uncultured_marine_group_I_thaumarchaeote	FJ487477.1.1375	99.282	0
UNI1448	0	0	0	0	0	0	5	8	0	0	0	8	0	0	0	10	11	1	Archaea;Thaumarchaeota;Nitrososphaeria;Nitrosopumilales;Nitrosopumilaceae;Candidatus_Nitrosopumilus;uncultured_marine_group_I_thaumarchaeote	FJ487477.1.1375	99.522	0
UNI1998	0	0	0	0	0	0	3	1	0	0	0	2	0	0	0	5	12	0	Archaea;Thaumarchaeota;Nitrososphaeria;Nitrosopumilales;Nitrosopumilaceae;Candidatus_Nitrosopumilus;uncultured_marine_group_I_thaumarchaeote	FJ487477.1.1375	99.043	0
UNI193	3	4	11	0	0	7	6	11	44	0	0	21	0	0	0	25	50	52	Archaea;Thaumarchaeota;Nitrososphaeria;Nitrosopumilales;Nitrosopumilaceae;Candidatus_Nitrosopumilus;uncultured_Nitrosopumilales_archaeon	EF069381.1.1440	99.282	0
UNI131	1	0	8	0	0	7	4	15	44	0	0	22	0	0	0	36	66	89	Archaea;Thaumarchaeota;Nitrososphaeria;Nitrosopumilales;Nitrosopumilaceae;Candidatus_Nitrosopumilus;uncultured_Nitrosopumilales_archaeon	EF069381.1.1440	99.043	0
UNI26	0	10	50	0	26	34	143	173	11	0	0	39	1	0	0	127	254	3	Archaea;Thaumarchaeota;Nitrososphaeria;Nitrosopumilales;Nitrosopumilaceae;Candidatus_Nitrosopumilus;uncultured_Nitrosopumilales_archaeon	EF069369.1.1440	99.522	0
UNI929	0	1	2	0	0	4	3	2	21	0	0	3	0	0	0	5	13	5	Archaea;Thaumarchaeota;Nitrososphaeria;Nitrosopumilales;Nitrosopumilaceae;Candidatus_Nitrosopumilus;uncultured_Nitrosopumilales_archaeon	EF069345.1.1440	100	0
UNI2132	0	4	0	0	12	23	0	0	1	0	0	0	0	0	0	0	0	1	Archaea;Thaumarchaeota;Nitrososphaeria;Nitrosopumilales;Nitrosopumilaceae;Candidatus_Nitrosopumilus;uncultured_Nitrosopumilales_archaeon	EF069338.1.1440	99.282	0
UNI70	0	9	16	0	0	9	35	53	5	0	0	55	0	0	0	208	179	12	Archaea;Thaumarchaeota;Nitrososphaeria;Nitrosopumilales;Nitrosopumilaceae;Candidatus_Nitrosopumilus;uncultured_Nitrosopumilales_archaeon	EF069381.1.1440	99.522	0
UNI196	0	2	5	0	0	1	21	30	3	0	0	15	0	0	0	79	81	4	Archaea;Thaumarchaeota;Nitrososphaeria;Nitrosopumilales;Nitrosopumilaceae;Candidatus_Nitrosopumilus;uncultured_Nitrosopumilales_archaeon	EF069381.1.1440	99.761	0
UNI412	0	6	7	0	0	7	3	6	14	0	0	5	0	0	0	11	41	17	Archaea;Thaumarchaeota;Nitrososphaeria;Nitrosopumilales;Nitrosopumilaceae;Candidatus_Nitrosopumilus;uncultured_Nitrosopumilales_archaeon	EF069345.1.1440	99.761	0
UNI48	0	8	21	1	0	10	43	35	9	0	0	80	0	0	0	259	242	8	Archaea;Thaumarchaeota;Nitrososphaeria;Nitrosopumilales;Nitrosopumilaceae;Candidatus_Nitrosopumilus;uncultured_Nitrosopumilales_archaeon	EF069381.1.1440	99.282	0
UNI43	0	5	43	1	14	34	86	125	4	0	0	35	0	0	0	91	140	0	Archaea;Thaumarchaeota;Nitrososphaeria;Nitrosopumilales;Nitrosopumilaceae;Candidatus_Nitrosopumilus;uncultured_Nitrosopumilales_archaeon	EF069369.1.1440	99.761	0
UNI178	0	4	18	0	11	15	35	80	2	0	0	6	1	0	0	15	42	1	Archaea;Thaumarchaeota;Nitrososphaeria;Nitrosopumilales;Nitrosopumilaceae;Candidatus_Nitrosopumilus;uncultured_Nitrosopumilales_archaeon	EF069369.1.1440	99.522	0
UNI2255	0	3	0	0	4	13	0	0	0	0	0	0	0	0	0	0	0	0	Archaea;Thaumarchaeota;Nitrososphaeria;Nitrosopumilales;Nitrosopumilaceae;Candidatus_Nitrosopumilus;uncultured_Nitrosopumilales_archaeon	EF069338.1.1440	99.043	0
UNI101	0	3	25	1	5	25	61	81	5	0	0	6	2	0	0	50	83	0	Archaea;Thaumarchaeota;Nitrososphaeria;Nitrosopumilales;Nitrosopumilaceae;Candidatus_Nitrosopumilus;uncultured_Nitrosopumilales_archaeon	EF069369.1.1440	100	0
UNI727	0	2	6	0	0	2	12	12	1	0	0	6	0	0	0	21	19	5	Archaea;Thaumarchaeota;Nitrososphaeria;Nitrosopumilales;Nitrosopumilaceae;Candidatus_Nitrosopumilus;uncultured_Nitrosopumilales_archaeon	EF069381.1.1440	99.522	0
UNI89	0	4	29	1	9	13	55	102	0	0	0	13	0	0	0	56	104	2	Archaea;Thaumarchaeota;Nitrososphaeria;Nitrosopumilales;Nitrosopumilaceae;Candidatus_Nitrosopumilus;uncultured_Nitrosopumilales_archaeon	EF069369.1.1440	99.761	0
UNI279	0	2	3	0	0	7	0	3	19	0	0	14	0	0	0	11	47	22	Archaea;Thaumarchaeota;Nitrososphaeria;Nitrosopumilales;Nitrosopumilaceae;Candidatus_Nitrosopumilus;uncultured_Nitrosopumilales_archaeon	EF069345.1.1440	99.522	0
UNI385	0	1	7	0	0	1	11	28	8	0	0	16	0	0	0	37	39	8	Archaea;Thaumarchaeota;Nitrososphaeria;Nitrosopumilales;Nitrosopumilaceae;Candidatus_Nitrosopumilus;uncultured_Nitrosopumilales_archaeon	EF069381.1.1440	99.282	0
UNI490	0	4	7	0	0	2	3	8	23	0	0	8	0	0	0	5	30	34	Archaea;Thaumarchaeota;Nitrososphaeria;Nitrosopumilales;Nitrosopumilaceae;Candidatus_Nitrosopumilus;uncultured_Nitrosopumilales_archaeon	EF069381.1.1440	99.282	0
UNI440	0	1	3	0	0	5	1	9	28	0	0	11	0	0	0	8	20	34	Archaea;Thaumarchaeota;Nitrososphaeria;Nitrosopumilales;Nitrosopumilaceae;Candidatus_Nitrosopumilus;uncultured_Nitrosopumilales_archaeon	EF069381.1.1440	99.522	0
UNI179	0	2	5	0	0	0	23	20	3	0	0	26	1	0	0	77	99	5	Archaea;Thaumarchaeota;Nitrososphaeria;Nitrosopumilales;Nitrosopumilaceae;Candidatus_Nitrosopumilus;uncultured_Nitrosopumilales_archaeon	EF069381.1.1440	99.522	0
UNI2875	0	1	0	0	7	8	0	0	5	0	0	0	0	0	0	0	0	2	Archaea;Thaumarchaeota;Nitrososphaeria;Nitrosopumilales;Nitrosopumilaceae;Candidatus_Nitrosopumilus;uncultured_Nitrosopumilales_archaeon	EF069338.1.1440	99.282	0
UNI793	0	1	3	0	0	0	5	4	22	0	0	7	0	0	0	9	11	18	Archaea;Thaumarchaeota;Nitrososphaeria;Nitrosopumilales;Nitrosopumilaceae;Candidatus_Nitrosopumilus;uncultured_Nitrosopumilales_archaeon	EF069381.1.1440	99.043	0
UNI1725	0	1	0	0	0	7	0	1	25	0	0	3	0	0	0	0	3	12	Archaea;Thaumarchaeota;Nitrososphaeria;Nitrosopumilales;Nitrosopumilaceae;Candidatus_Nitrosopumilus;uncultured_Nitrosopumilales_archaeon	EF069350.1.1440	99.282	0
UNI1432	0	1	4	0	0	2	0	2	13	0	0	0	0	0	0	3	13	3	Archaea;Thaumarchaeota;Nitrososphaeria;Nitrosopumilales;Nitrosopumilaceae;Candidatus_Nitrosopumilus;uncultured_Nitrosopumilales_archaeon	EF069345.1.1440	99.522	0
UNI960	0	0	4	0	0	3	0	4	10	0	0	3	0	0	0	6	19	9	Archaea;Thaumarchaeota;Nitrososphaeria;Nitrosopumilales;Nitrosopumilaceae;Candidatus_Nitrosopumilus;uncultured_Nitrosopumilales_archaeon	EF069345.1.1440	99.761	0
UNI1638	0	0	4	0	0	0	7	23	1	0	0	2	0	0	0	2	5	0	Archaea;Thaumarchaeota;Nitrososphaeria;Nitrosopumilales;Nitrosopumilaceae;Candidatus_Nitrosopumilus;uncultured_Nitrosopumilales_archaeon	EF069369.1.1440	99.282	0
UNI1006	0	0	6	0	0	1	13	6	0	0	0	1	1	0	0	10	5	0	Archaea;Thaumarchaeota;Nitrososphaeria;Nitrosopumilales;Nitrosopumilaceae;Candidatus_Nitrosopumilus;uncultured_Nitrosopumilales_archaeon	EF069369.1.1440	99.761	0
UNI298	0	0	12	1	0	2	13	10	4	0	0	5	3	0	0	29	33	2	Archaea;Thaumarchaeota;Nitrososphaeria;Nitrosopumilales;Nitrosopumilaceae;Candidatus_Nitrosopumilus;uncultured_Nitrosopumilales_archaeon	EF069369.1.1440	99.282	0
UNI251	0	0	12	1	0	0	44	66	6	0	0	6	0	0	0	29	43	4	Archaea;Thaumarchaeota;Nitrososphaeria;Nitrosopumilales;Nitrosopumilaceae;Candidatus_Nitrosopumilus;uncultured_Nitrosopumilales_archaeon	EF069369.1.1440	99.043	0
UNI347	0	0	8	0	0	2	16	10	4	0	0	7	0	0	0	18	28	0	Archaea;Thaumarchaeota;Nitrososphaeria;Nitrosopumilales;Nitrosopumilaceae;Candidatus_Nitrosopumilus;uncultured_Nitrosopumilales_archaeon	EF069369.1.1440	99.522	0
UNI330	0	0	12	0	0	1	26	59	11	0	0	3	0	0	0	25	30	5	Archaea;Thaumarchaeota;Nitrososphaeria;Nitrosopumilales;Nitrosopumilaceae;Candidatus_Nitrosopumilus;uncultured_Nitrosopumilales_archaeon	EF069369.1.1440	99.282	0
UNI1061	0	0	4	0	0	0	14	25	2	0	0	1	0	0	0	6	13	2	Archaea;Thaumarchaeota;Nitrososphaeria;Nitrosopumilales;Nitrosopumilaceae;Candidatus_Nitrosopumilus;uncultured_Nitrosopumilales_archaeon	EF069369.1.1440	99.043	0
UNI334	0	0	11	0	2	10	16	29	2	0	0	2	0	0	0	11	24	0	Archaea;Thaumarchaeota;Nitrososphaeria;Nitrosopumilales;Nitrosopumilaceae;Candidatus_Nitrosopumilus;uncultured_Nitrosopumilales_archaeon	EF069369.1.1440	99.761	0
UNI536	0	0	3	0	0	0	21	38	1	0	0	0	0	0	0	13	14	0	Archaea;Thaumarchaeota;Nitrososphaeria;Nitrosopumilales;Nitrosopumilaceae;Candidatus_Nitrosopumilus;uncultured_Nitrosopumilales_archaeon	EF069369.1.1440	99.282	0
UNI583	0	0	10	0	0	1	19	6	1	0	0	2	1	0	0	10	12	1	Archaea;Thaumarchaeota;Nitrososphaeria;Nitrosopumilales;Nitrosopumilaceae;Candidatus_Nitrosopumilus;uncultured_Nitrosopumilales_archaeon	EF069369.1.1440	99.522	0
UNI2626	0	0	2	0	0	0	2	8	0	0	0	0	0	0	0	2	2	0	Archaea;Thaumarchaeota;Nitrososphaeria;Nitrosopumilales;Nitrosopumilaceae;Candidatus_Nitrosopumilus;uncultured_Nitrosopumilales_archaeon	EF069369.1.1440	99.522	0
UNI987	0	0	2	0	0	0	0	7	0	0	0	2	0	0	0	1	48	0	Archaea;Thaumarchaeota;Nitrososphaeria;Nitrosopumilales;Nitrosopumilaceae;Candidatus_Nitrosopumilus;uncultured_Nitrosopumilales_archaeon	EF069381.1.1440	98.804	0
UNI1857	0	0	6	0	0	1	0	3	0	0	0	18	0	0	0	9	10	1	Archaea;Thaumarchaeota;Nitrososphaeria;Nitrosopumilales;Nitrosopumilaceae;Candidatus_Nitrosopumilus;uncultured_Nitrosopumilales_archaeon	EF069381.1.1440	98.804	0
UNI2221	0	0	1	0	0	0	0	3	0	0	0	3	0	0	0	0	12	0	Archaea;Thaumarchaeota;Nitrososphaeria;Nitrosopumilales;Nitrosopumilaceae;Candidatus_Nitrosopumilus;uncultured_Nitrosopumilales_archaeon	EF069381.1.1440	99.282	0
UNI1322	0	0	4	0	0	1	9	5	0	0	0	0	0	0	0	3	9	1	Archaea;Thaumarchaeota;Nitrososphaeria;Nitrosopumilales;Nitrosopumilaceae;Candidatus_Nitrosopumilus;uncultured_Nitrosopumilales_archaeon	EF069369.1.1440	99.282	0
UNI880	0	0	5	1	0	0	23	29	4	0	0	4	0	0	0	8	15	0	Archaea;Thaumarchaeota;Nitrososphaeria;Nitrosopumilales;Nitrosopumilaceae;Candidatus_Nitrosopumilus;uncultured_Nitrosopumilales_archaeon	EF069369.1.1440	99.522	0
UNI2873	0	0	0	0	6	0	0	0	37	0	0	0	0	0	0	0	0	9	Archaea;Thaumarchaeota;Nitrososphaeria;Nitrosopumilales;Nitrosopumilaceae;Candidatus_Nitrosopumilus;uncultured_Nitrosopumilales_archaeon	EF069338.1.1440	99.522	0
UNI3183	0	0	0	0	0	4	0	0	9	0	0	0	0	0	0	0	0	10	Archaea;Thaumarchaeota;Nitrososphaeria;Nitrosopumilales;Nitrosopumilaceae;Candidatus_Nitrosopumilus;uncultured_Nitrosopumilales_archaeon	EF069350.1.1440	99.761	0
UNI1129	0	0	0	0	0	5	0	0	45	0	0	5	0	0	0	0	0	22	Archaea;Thaumarchaeota;Nitrososphaeria;Nitrosopumilales;Nitrosopumilaceae;Candidatus_Nitrosopumilus;uncultured_Nitrosopumilales_archaeon	EF069350.1.1440	99.522	0
UNI2526	0	0	0	0	0	1	0	1	34	0	1	0	0	0	0	0	0	19	Archaea;Thaumarchaeota;Nitrososphaeria;Nitrosopumilales;Nitrosopumilaceae;Candidatus_Nitrosopumilus;uncultured_Nitrosopumilales_archaeon	EF069350.1.1440	99.522	0
UNI1821	0	0	0	0	0	1	1	4	9	0	0	1	0	0	0	1	7	7	Archaea;Thaumarchaeota;Nitrososphaeria;Nitrosopumilales;Nitrosopumilaceae;Candidatus_Nitrosopumilus;uncultured_Nitrosopumilales_archaeon	EF069381.1.1440	99.282	0
UNI3423	0	0	0	0	0	1	0	1	15	0	0	0	0	0	0	0	1	5	Archaea;Thaumarchaeota;Nitrososphaeria;Nitrosopumilales;Nitrosopumilaceae;Candidatus_Nitrosopumilus;uncultured_Nitrosopumilales_archaeon	EF069350.1.1440	99.043	0
UNI2461	0	0	0	0	0	1	6	3	0	0	0	0	0	0	0	1	6	0	Archaea;Thaumarchaeota;Nitrososphaeria;Nitrosopumilales;Nitrosopumilaceae;Candidatus_Nitrosopumilus;uncultured_Nitrosopumilales_archaeon	EF069369.1.1440	99.522	0
UNI514	0	0	0	0	0	0	6	16	0	0	0	0	0	0	0	27	24	1	Archaea;Thaumarchaeota;Nitrososphaeria;Nitrosopumilales;Nitrosopumilaceae;Candidatus_Nitrosopumilus;uncultured_Nitrosopumilales_archaeon	EF069369.1.1440	99.522	0
UNI852	0	0	0	0	0	0	15	12	0	0	0	0	0	0	0	17	10	0	Archaea;Thaumarchaeota;Nitrososphaeria;Nitrosopumilales;Nitrosopumilaceae;Candidatus_Nitrosopumilus;uncultured_Nitrosopumilales_archaeon	EF069369.1.1440	99.522	0
UNI480	0	0	0	0	0	0	1	0	62	0	1	0	0	0	0	0	0	49	Archaea;Thaumarchaeota;Nitrososphaeria;Nitrosopumilales;Nitrosopumilaceae;Candidatus_Nitrosopumilus;uncultured_Nitrosopumilales_archaeon	EF069342.1.1440	99.761	0
UNI1295	0	0	0	0	0	0	0	3	0	0	0	0	0	0	0	0	28	0	Archaea;Thaumarchaeota;Nitrososphaeria;Nitrosopumilales;Nitrosopumilaceae;Candidatus_Nitrosopumilus;uncultured_Nitrosopumilales_archaeon	EF069381.1.1440	99.043	0
UNI1660	0	0	0	0	0	0	0	0	20	0	0	0	0	0	0	0	0	15	Archaea;Thaumarchaeota;Nitrososphaeria;Nitrosopumilales;Nitrosopumilaceae;Candidatus_Nitrosopumilus;uncultured_Nitrosopumilales_archaeon	EF069342.1.1440	99.522	0
UNI1216	0	0	0	0	0	0	0	0	33	0	0	0	0	0	0	1	0	19	Archaea;Thaumarchaeota;Nitrososphaeria;Nitrosopumilales;Nitrosopumilaceae;Candidatus_Nitrosopumilus;uncultured_Nitrosopumilales_archaeon	EF069342.1.1440	99.761	0
UNI3290	0	0	0	0	0	0	0	0	18	0	0	0	0	0	0	0	0	3	Archaea;Thaumarchaeota;Nitrososphaeria;Nitrosopumilales;Nitrosopumilaceae;Candidatus_Nitrosopumilus;uncultured_Nitrosopumilales_archaeon	EF069342.1.1440	99.761	0
UNI367	0	0	0	0	0	0	0	0	58	0	0	0	0	0	0	0	0	59	Archaea;Thaumarchaeota;Nitrososphaeria;Nitrosopumilales;Nitrosopumilaceae;Candidatus_Nitrosopumilus;uncultured_Nitrosopumilales_archaeon	EF069342.1.1440	99.522	0
UNI2595	0	0	0	0	0	0	0	0	19	0	0	0	0	0	0	0	0	14	Archaea;Thaumarchaeota;Nitrososphaeria;Nitrosopumilales;Nitrosopumilaceae;Candidatus_Nitrosopumilus;uncultured_Nitrosopumilales_archaeon	EF069350.1.1440	99.282	0
UNI1197	0	0	0	0	0	0	0	0	32	0	0	0	0	0	0	0	0	17	Archaea;Thaumarchaeota;Nitrososphaeria;Nitrosopumilales;Nitrosopumilaceae;Candidatus_Nitrosopumilus;uncultured_Nitrosopumilales_archaeon	EF069342.1.1440	100	0
UNI1213	0	0	0	0	0	0	0	0	0	0	0	43	0	0	0	0	0	0	Archaea;Thaumarchaeota;Nitrososphaeria;Nitrosopumilales;Nitrosopumilaceae;Candidatus_Nitrosopumilus;uncultured_Nitrosopumilales_archaeon	EF069345.1.1440	99.043	0
UNI2516	0	0	0	0	0	0	0	0	0	0	0	20	0	0	0	0	0	0	Archaea;Thaumarchaeota;Nitrososphaeria;Nitrosopumilales;Nitrosopumilaceae;Candidatus_Nitrosopumilus;uncultured_Nitrosopumilales_archaeon	EF069345.1.1440	99.282	0
UNI1119	4	14	11	0	0	0	10	14	2	0	0	2	1	0	0	1	12	3	Archaea;Thaumarchaeota;Nitrososphaeria;Nitrosopumilales;Nitrosopumilaceae;Candidatus_Nitrosopumilus;uncultured_sediment_archaeon	FN553716.1.1345	99.282	0
UNI2618	3	8	1	2	1	11	0	3	1	0	0	0	0	0	0	0	3	0	Archaea;Thaumarchaeota;Nitrososphaeria;Nitrosopumilales;Nitrosopumilaceae;Candidatus_Nitrosopumilus;uncultured_sediment_archaeon	FN553855.1.1343	100	0
UNI1187	3	13	6	0	0	0	2	13	0	0	0	3	0	0	0	1	8	2	Archaea;Thaumarchaeota;Nitrososphaeria;Nitrosopumilales;Nitrosopumilaceae;Candidatus_Nitrosopumilus;uncultured_sediment_archaeon	FN553716.1.1345	99.522	0
UNI1782	2	0	1	1	12	5	1	3	0	0	0	0	0	0	0	1	2	0	Archaea;Thaumarchaeota;Nitrososphaeria;Nitrosopumilales;Nitrosopumilaceae;Candidatus_Nitrosopumilus;uncultured_sediment_archaeon	FN553852.1.1342	99.522	0
UNI2477	3	18	4	0	2	17	1	0	0	0	0	0	0	0	0	0	0	0	Archaea;Thaumarchaeota;Nitrososphaeria;Nitrosopumilales;Nitrosopumilaceae;Candidatus_Nitrosopumilus;uncultured_sediment_archaeon	FN553855.1.1343	99.761	0
UNI1301	2	8	7	0	0	0	4	15	0	0	0	3	1	0	0	1	4	0	Archaea;Thaumarchaeota;Nitrososphaeria;Nitrosopumilales;Nitrosopumilaceae;Candidatus_Nitrosopumilus;uncultured_sediment_archaeon	FN553716.1.1345	99.522	0
UNI675	1	3	4	0	30	8	2	4	0	0	0	0	0	0	0	2	12	0	Archaea;Thaumarchaeota;Nitrososphaeria;Nitrosopumilales;Nitrosopumilaceae;Candidatus_Nitrosopumilus;uncultured_sediment_archaeon	FN553852.1.1342	99.522	0
UNI1776	1	3	0	0	10	6	3	4	0	0	0	1	1	0	0	7	3	0	Archaea;Thaumarchaeota;Nitrososphaeria;Nitrosopumilales;Nitrosopumilaceae;Candidatus_Nitrosopumilus;uncultured_sediment_archaeon	FN553852.1.1342	100	0
UNI2367	5	29	7	1	2	26	1	1	2	0	0	0	1	0	0	0	0	1	Archaea;Thaumarchaeota;Nitrososphaeria;Nitrosopumilales;Nitrosopumilaceae;Candidatus_Nitrosopumilus;uncultured_sediment_archaeon	FN553855.1.1343	99.761	0
UNI860	1	4	4	0	21	7	7	3	0	0	0	5	2	0	0	11	11	0	Archaea;Thaumarchaeota;Nitrososphaeria;Nitrosopumilales;Nitrosopumilaceae;Candidatus_Nitrosopumilus;uncultured_sediment_archaeon	FN553852.1.1342	99.761	0
UNI2238	1	8	1	0	0	0	1	5	0	0	0	0	2	0	0	0	4	1	Archaea;Thaumarchaeota;Nitrososphaeria;Nitrosopumilales;Nitrosopumilaceae;Candidatus_Nitrosopumilus;uncultured_sediment_archaeon	FN553716.1.1345	99.761	0
UNI994	1	4	4	7	18	4	6	0	0	0	0	4	3	0	0	2	2	0	Archaea;Thaumarchaeota;Nitrososphaeria;Nitrosopumilales;Nitrosopumilaceae;Candidatus_Nitrosopumilus;uncultured_sediment_archaeon	FN553852.1.1342	99.761	0
UNI3145	0	1	2	0	2	0	3	0	2	0	0	0	1	0	0	11	4	0	Archaea;Thaumarchaeota;Nitrososphaeria;Nitrosopumilales;Nitrosopumilaceae;Candidatus_Nitrosopumilus;uncultured_sediment_archaeon	FN553852.1.1342	99.522	0
UNI1678	0	4	3	0	0	0	7	3	2	0	0	1	1	0	0	21	6	0	Archaea;Thaumarchaeota;Nitrososphaeria;Nitrosopumilales;Nitrosopumilaceae;Candidatus_Nitrosopumilus;uncultured_sediment_archaeon	FN553852.1.1342	99.282	0
UNI2467	0	1	6	0	0	0	0	0	4	0	0	1	0	0	0	0	3	1	Archaea;Thaumarchaeota;Nitrososphaeria;Nitrosopumilales;Nitrosopumilaceae;Candidatus_Nitrosopumilus;uncultured_sediment_archaeon	FN553716.1.1345	99.522	0
UNI3054	0	2	0	0	8	4	2	1	1	0	0	0	0	0	0	0	0	0	Archaea;Thaumarchaeota;Nitrososphaeria;Nitrosopumilales;Nitrosopumilaceae;Candidatus_Nitrosopumilus;uncultured_sediment_archaeon	FN553852.1.1342	99.761	0
UNI1143	0	1	3	0	0	0	13	5	0	0	0	1	2	0	0	16	4	0	Archaea;Thaumarchaeota;Nitrososphaeria;Nitrosopumilales;Nitrosopumilaceae;Candidatus_Nitrosopumilus;uncultured_sediment_archaeon	FN553716.1.1345	99.043	0
UNI2273	0	0	5	0	0	0	12	5	0	0	0	2	0	0	0	10	3	1	Archaea;Thaumarchaeota;Nitrososphaeria;Nitrosopumilales;Nitrosopumilaceae;Candidatus_Nitrosopumilus;uncultured_sediment_archaeon	FN553716.1.1345	99.282	0
UNI2392	0	0	3	0	0	1	2	5	0	0	0	2	0	0	0	4	0	0	Archaea;Thaumarchaeota;Nitrososphaeria;Nitrosopumilales;Nitrosopumilaceae;Candidatus_Nitrosopumilus;uncultured_sediment_archaeon	FN553716.1.1345	99.282	0
UNI3507	0	0	1	0	0	0	4	0	1	0	0	2	0	0	0	3	1	0	Archaea;Thaumarchaeota;Nitrososphaeria;Nitrosopumilales;Nitrosopumilaceae;Candidatus_Nitrosopumilus;uncultured_sediment_archaeon	FN553716.1.1345	99.522	0
UNI2076	0	0	0	0	0	1	5	4	1	0	0	6	0	0	0	2	3	0	Archaea;Thaumarchaeota;Nitrososphaeria;Nitrosopumilales;Nitrosopumilaceae;Candidatus_Nitrosopumilus;uncultured_sediment_archaeon	FN553716.1.1345	99.522	0
UNI2881	0	0	0	0	0	0	7	1	1	0	0	0	0	0	0	4	5	0	Archaea;Thaumarchaeota;Nitrososphaeria;Nitrosopumilales;Nitrosopumilaceae;Candidatus_Nitrosopumilus;uncultured_sediment_archaeon	FN553716.1.1345	99.282	0
UNI355	14	8	0	0	94	3	0	0	0	0	0	0	0	0	0	0	0	0	Archaea;Thaumarchaeota;Nitrososphaeria;Nitrosopumilales;Nitrosopumilaceae;uncultured_archaeon	LC139862.1.900	99.281	0
UNI280	39	52	17	11	77	20	6	6	0	0	1	1	7	0	0	1	1	0	Archaea;Thaumarchaeota;Nitrososphaeria;Nitrosopumilales;Nitrosopumilaceae;uncultured_archaeon	FJ571832.1.1345	99.761	0
UNI145	35	37	24	33	65	16	9	7	0	0	0	6	12	0	0	11	10	0	Archaea;Thaumarchaeota;Nitrososphaeria;Nitrosopumilales;Nitrosopumilaceae;uncultured_archaeon	JQ815988.1.1401	100	0
UNI288	17	20	1	0	39	96	0	3	0	0	0	1	0	0	0	0	0	0	Archaea;Thaumarchaeota;Nitrososphaeria;Nitrosopumilales;Nitrosopumilaceae;uncultured_archaeon	JX000671.1.1402	99.761	0
UNI429	20	45	18	2	0	0	0	3	0	0	2	7	7	0	0	0	1	0	Archaea;Thaumarchaeota;Nitrososphaeria;Nitrosopumilales;Nitrosopumilaceae;uncultured_archaeon	FJ571874.1.1346	99.761	0
UNI80	93	117	21	25	166	53	16	10	0	0	4	7	5	0	0	5	21	0	Archaea;Thaumarchaeota;Nitrososphaeria;Nitrosopumilales;Nitrosopumilaceae;uncultured_archaeon	FJ571832.1.1345	99.761	0
UNI37	92	144	62	5	73	46	53	44	0	0	0	17	11	0	0	41	64	0	Archaea;Thaumarchaeota;Nitrososphaeria;Nitrosopumilales;Nitrosopumilaceae;uncultured_archaeon	FJ571929.1.1346	99.522	0
UNI45	108	158	36	8	235	103	17	12	0	0	8	15	11	2	0	4	37	0	Archaea;Thaumarchaeota;Nitrososphaeria;Nitrosopumilales;Nitrosopumilaceae;uncultured_archaeon	FJ571832.1.1345	99.761	0
UNI1238	10	18	6	3	0	0	0	0	0	0	0	4	2	0	0	0	0	0	Archaea;Thaumarchaeota;Nitrososphaeria;Nitrosopumilales;Nitrosopumilaceae;uncultured_archaeon	FJ571874.1.1346	99.522	0
UNI3200	10	6	2	0	3	1	0	2	0	0	0	0	0	0	0	0	2	0	Archaea;Thaumarchaeota;Nitrososphaeria;Nitrosopumilales;Nitrosopumilaceae;uncultured_archaeon	FJ571848.1.1346	99.522	0
UNI144	64	43	3	0	86	40	1	3	4	0	0	0	0	0	0	0	1	3	Archaea;Thaumarchaeota;Nitrososphaeria;Nitrosopumilales;Nitrosopumilaceae;uncultured_archaeon	FJ571831.1.1346	99.522	0
UNI2130	5	0	0	0	40	0	0	1	0	0	0	0	0	0	0	0	0	0	Archaea;Thaumarchaeota;Nitrososphaeria;Nitrosopumilales;Nitrosopumilaceae;uncultured_archaeon	LC139766.1.900	98.801	0
UNI161	51	89	14	5	127	36	6	5	0	0	0	1	2	0	0	1	9	0	Archaea;Thaumarchaeota;Nitrososphaeria;Nitrosopumilales;Nitrosopumilaceae;uncultured_archaeon	FJ571832.1.1345	99.522	0
UNI109	49	92	25	6	40	29	17	23	1	0	0	7	7	0	0	15	27	0	Archaea;Thaumarchaeota;Nitrososphaeria;Nitrosopumilales;Nitrosopumilaceae;uncultured_archaeon	FJ571929.1.1346	100	0
UNI1254	15	12	4	0	0	1	5	4	0	0	4	2	0	0	0	1	1	0	Archaea;Thaumarchaeota;Nitrososphaeria;Nitrosopumilales;Nitrosopumilaceae;uncultured_archaeon	FJ571874.1.1346	99.522	0
UNI1300	12	13	0	0	0	0	0	4	0	0	0	2	0	0	0	0	4	0	Archaea;Thaumarchaeota;Nitrososphaeria;Nitrosopumilales;Nitrosopumilaceae;uncultured_archaeon	FJ571712.1.1345	99.522	0
UNI476	33	15	13	0	7	41	0	1	0	0	6	3	0	3	0	0	0	0	Archaea;Thaumarchaeota;Nitrososphaeria;Nitrosopumilales;Nitrosopumilaceae;uncultured_archaeon	FJ571892.1.1345	99.761	0
UNI342	33	11	14	0	5	62	0	1	0	0	5	11	0	3	0	0	0	0	Archaea;Thaumarchaeota;Nitrososphaeria;Nitrosopumilales;Nitrosopumilaceae;uncultured_archaeon	FJ571892.1.1345	99.282	0
UNI38	126	204	40	14	233	94	24	20	0	0	5	14	29	1	0	11	37	0	Archaea;Thaumarchaeota;Nitrososphaeria;Nitrosopumilales;Nitrosopumilaceae;uncultured_archaeon	FJ571832.1.1345	99.522	0
UNI812	36	14	0	7	12	1	0	0	0	0	0	4	7	0	0	0	0	0	Archaea;Thaumarchaeota;Nitrososphaeria;Nitrosopumilales;Nitrosopumilaceae;uncultured_archaeon	JQ327920.1.920	99.522	0
UNI635	23	49	4	2	24	5	2	4	0	0	0	0	1	0	0	0	4	0	Archaea;Thaumarchaeota;Nitrososphaeria;Nitrosopumilales;Nitrosopumilaceae;uncultured_archaeon	JX870219.1.915	99.761	0
UNI378	20	48	2	1	16	22	0	2	2	0	0	3	0	1	0	0	3	1	Archaea;Thaumarchaeota;Nitrososphaeria;Nitrosopumilales;Nitrosopumilaceae;uncultured_archaeon	FJ571929.1.1346	99.522	0
UNI935	8	30	7	13	0	0	0	0	0	0	0	4	0	0	0	0	0	0	Archaea;Thaumarchaeota;Nitrososphaeria;Nitrosopumilales;Nitrosopumilaceae;uncultured_archaeon	FJ571874.1.1346	99.761	0
UNI56	49	67	56	23	99	37	27	12	0	0	0	21	25	0	0	35	20	0	Archaea;Thaumarchaeota;Nitrososphaeria;Nitrosopumilales;Nitrosopumilaceae;uncultured_archaeon	JQ815988.1.1401	99.522	0
UNI2747	15	12	4	1	0	1	1	2	0	0	0	0	0	0	0	0	0	0	Archaea;Thaumarchaeota;Nitrososphaeria;Nitrosopumilales;Nitrosopumilaceae;uncultured_archaeon	FJ571706.1.1345	98.804	0
UNI106	72	83	15	27	146	51	5	10	0	0	0	4	2	0	0	0	13	0	Archaea;Thaumarchaeota;Nitrososphaeria;Nitrosopumilales;Nitrosopumilaceae;uncultured_archaeon	FJ571832.1.1345	100	0
UNI1451	10	17	2	0	0	0	4	0	0	0	0	1	0	0	0	1	3	0	Archaea;Thaumarchaeota;Nitrososphaeria;Nitrosopumilales;Nitrosopumilaceae;uncultured_archaeon	FJ571874.1.1346	99.282	0
UNI301	13	24	10	40	20	15	12	5	0	0	0	3	23	0	0	5	10	0	Archaea;Thaumarchaeota;Nitrososphaeria;Nitrosopumilales;Nitrosopumilaceae;uncultured_archaeon	FJ571957.1.1345	99.761	0
UNI406	23	41	18	4	0	1	0	2	0	0	2	5	4	0	0	0	0	0	Archaea;Thaumarchaeota;Nitrososphaeria;Nitrosopumilales;Nitrosopumilaceae;uncultured_archaeon	FJ571874.1.1346	99.522	0
UNI425	21	9	11	1	10	53	0	0	0	0	5	5	0	1	0	0	1	0	Archaea;Thaumarchaeota;Nitrososphaeria;Nitrosopumilales;Nitrosopumilaceae;uncultured_archaeon	FJ571892.1.1345	99.522	0
UNI166	56	53	10	0	98	37	0	3	4	0	0	0	0	0	0	0	0	2	Archaea;Thaumarchaeota;Nitrososphaeria;Nitrosopumilales;Nitrosopumilaceae;uncultured_archaeon	FJ571831.1.1346	99.761	0
UNI3176	58	0	0	0	0	0	0	0	0	0	0	0	0	0	0	0	0	0	Archaea;Thaumarchaeota;Nitrososphaeria;Nitrosopumilales;Nitrosopumilaceae;uncultured_archaeon	FJ571868.1.1345	98.804	0
UNI31	41	93	56	121	32	20	138	68	4	0	0	39	54	0	0	54	70	1	Archaea;Thaumarchaeota;Nitrososphaeria;Nitrosopumilales;Nitrosopumilaceae;uncultured_archaeon	JQ013326.1.914	99.761	0
UNI39	82	125	53	4	67	42	44	64	0	0	0	28	11	0	0	38	76	0	Archaea;Thaumarchaeota;Nitrososphaeria;Nitrosopumilales;Nitrosopumilaceae;uncultured_archaeon	FJ571929.1.1346	99.761	0
UNI2523	10	3	0	4	10	5	1	1	0	0	0	0	0	0	0	0	1	0	Archaea;Thaumarchaeota;Nitrososphaeria;Nitrosopumilales;Nitrosopumilaceae;uncultured_archaeon	KM454197.1.913	99.522	0
UNI25	54	92	69	118	26	19	150	89	7	0	0	53	92	0	0	59	105	2	Archaea;Thaumarchaeota;Nitrososphaeria;Nitrosopumilales;Nitrosopumilaceae;uncultured_archaeon	JQ013326.1.914	99.522	0
UNI1709	12	23	1	1	7	0	0	1	0	0	0	0	0	0	0	0	0	0	Archaea;Thaumarchaeota;Nitrososphaeria;Nitrosopumilales;Nitrosopumilaceae;uncultured_archaeon	FJ571860.1.1345	98.804	0
UNI2989	3	4	0	0	5	1	0	0	0	0	0	0	0	0	0	0	0	0	Archaea;Thaumarchaeota;Nitrososphaeria;Nitrosopumilales;Nitrosopumilaceae;uncultured_archaeon	FJ571874.1.1346	99.282	0
UNI123	28	30	24	27	88	21	23	8	0	0	0	10	12	0	0	11	11	0	Archaea;Thaumarchaeota;Nitrososphaeria;Nitrosopumilales;Nitrosopumilaceae;uncultured_archaeon	JQ815988.1.1401	99.761	0
UNI2147	6	5	4	8	17	5	1	2	0	0	0	0	3	0	0	0	0	0	Archaea;Thaumarchaeota;Nitrososphaeria;Nitrosopumilales;Nitrosopumilaceae;uncultured_archaeon	LC139788.1.900	100	0
UNI361	23	42	15	2	15	9	10	15	1	0	0	1	0	0	0	0	3	1	Archaea;Thaumarchaeota;Nitrososphaeria;Nitrosopumilales;Nitrosopumilaceae;uncultured_archaeon	FJ571929.1.1346	99.761	0
UNI593	17	13	8	0	7	40	0	0	0	0	4	0	0	1	0	0	0	0	Archaea;Thaumarchaeota;Nitrososphaeria;Nitrosopumilales;Nitrosopumilaceae;uncultured_archaeon	FJ571892.1.1345	99.522	0
UNI743	19	9	2	0	0	3	6	5	0	0	1	0	0	0	0	0	14	0	Archaea;Thaumarchaeota;Nitrososphaeria;Nitrosopumilales;Nitrosopumilaceae;uncultured_archaeon	FJ571874.1.1346	99.043	0
UNI1691	3	3	1	28	0	0	2	0	0	0	0	3	5	0	0	2	2	0	Archaea;Thaumarchaeota;Nitrososphaeria;Nitrosopumilales;Nitrosopumilaceae;uncultured_archaeon	FJ571960.1.1345	99.043	0
UNI546	11	14	0	0	31	41	0	2	0	0	0	0	0	0	0	0	0	0	Archaea;Thaumarchaeota;Nitrososphaeria;Nitrosopumilales;Nitrosopumilaceae;uncultured_archaeon	JX000671.1.1402	99.522	0
UNI1366	8	31	3	0	0	0	0	0	0	0	0	0	0	0	0	0	0	0	Archaea;Thaumarchaeota;Nitrososphaeria;Nitrosopumilales;Nitrosopumilaceae;uncultured_archaeon	LC081093.1.1439	99.282	0
UNI774	36	13	0	7	9	2	0	0	0	0	0	2	4	0	0	0	0	0	Archaea;Thaumarchaeota;Nitrososphaeria;Nitrosopumilales;Nitrosopumilaceae;uncultured_archaeon	JQ327920.1.920	99.761	0
UNI278	24	11	0	0	107	1	0	0	0	0	0	0	0	0	0	0	0	0	Archaea;Thaumarchaeota;Nitrososphaeria;Nitrosopumilales;Nitrosopumilaceae;uncultured_archaeon	FJ571892.1.1345	99.282	0
UNI1669	2	4	1	14	1	2	0	2	0	0	0	0	10	0	0	0	2	0	Archaea;Thaumarchaeota;Nitrososphaeria;Nitrosopumilales;Nitrosopumilaceae;uncultured_archaeon	FJ571957.1.1345	99.522	0
UNI1963	27	31	0	0	0	0	0	0	0	0	0	0	0	0	0	0	0	0	Archaea;Thaumarchaeota;Nitrososphaeria;Nitrosopumilales;Nitrosopumilaceae;uncultured_archaeon	KP204798.1.1396	98.565	0
UNI833	38	12	0	6	14	1	0	0	0	0	0	1	4	0	0	0	0	0	Archaea;Thaumarchaeota;Nitrososphaeria;Nitrosopumilales;Nitrosopumilaceae;uncultured_archaeon	JQ327920.1.920	100	0
UNI1554	10	16	1	0	5	14	0	0	0	0	0	0	0	0	0	0	0	0	Archaea;Thaumarchaeota;Nitrososphaeria;Nitrosopumilales;Nitrosopumilaceae;uncultured_archaeon	FJ571874.1.1346	99.282	0
UNI604	20	8	0	0	61	2	0	0	0	0	0	0	0	0	0	0	0	0	Archaea;Thaumarchaeota;Nitrososphaeria;Nitrosopumilales;Nitrosopumilaceae;uncultured_archaeon	LC139862.1.900	99.52	0
UNI1023	32	9	0	8	7	0	0	1	0	0	0	0	3	0	0	0	0	0	Archaea;Thaumarchaeota;Nitrososphaeria;Nitrosopumilales;Nitrosopumilaceae;uncultured_archaeon	JQ327920.1.920	99.761	0
UNI1210	1	4	15	0	15	0	1	4	0	0	0	8	2	0	0	0	2	0	Archaea;Thaumarchaeota;Nitrososphaeria;Nitrosopumilales;Nitrosopumilaceae;uncultured_archaeon	AB629515.1.913	99.043	0
UNI345	44	45	1	1	42	10	1	4	0	0	0	0	0	0	0	3	7	0	Archaea;Thaumarchaeota;Nitrososphaeria;Nitrosopumilales;Nitrosopumilaceae;uncultured_archaeon	LC139932.1.900	99.52	0
UNI2304	26	17	1	1	0	1	0	0	0	0	0	0	0	0	0	0	0	0	Archaea;Thaumarchaeota;Nitrososphaeria;Nitrosopumilales;Nitrosopumilaceae;uncultured_archaeon	LC139766.1.900	98.561	0
UNI835	7	14	1	0	11	31	0	0	0	0	0	0	0	0	0	0	1	0	Archaea;Thaumarchaeota;Nitrososphaeria;Nitrosopumilales;Nitrosopumilaceae;uncultured_archaeon	JX000671.1.1402	100	0
UNI417	26	21	2	0	39	13	0	1	4	0	0	0	0	0	0	0	0	1	Archaea;Thaumarchaeota;Nitrososphaeria;Nitrosopumilales;Nitrosopumilaceae;uncultured_archaeon	FJ571831.1.1346	99.522	0
UNI2473	9	4	0	0	7	2	0	0	0	0	0	0	0	0	0	0	0	0	Archaea;Thaumarchaeota;Nitrososphaeria;Nitrosopumilales;Nitrosopumilaceae;uncultured_archaeon	KM454185.1.915	99.761	0
UNI1260	16	38	1	0	0	0	0	0	0	0	0	1	0	0	0	0	0	0	Archaea;Thaumarchaeota;Nitrososphaeria;Nitrosopumilales;Nitrosopumilaceae;uncultured_archaeon	FJ571868.1.1345	99.043	0
UNI1417	36	17	0	0	28	0	0	0	0	0	2	0	0	0	0	0	0	0	Archaea;Thaumarchaeota;Nitrososphaeria;Nitrosopumilales;Nitrosopumilaceae;uncultured_archaeon	LC139937.1.900	99.281	0
UNI76	48	55	54	25	94	42	32	20	0	0	0	16	15	0	0	18	20	0	Archaea;Thaumarchaeota;Nitrososphaeria;Nitrosopumilales;Nitrosopumilaceae;uncultured_archaeon	JQ815988.1.1401	99.761	0
UNI245	10	31	10	45	7	5	36	16	2	0	0	3	5	0	0	3	4	1	Archaea;Thaumarchaeota;Nitrososphaeria;Nitrosopumilales;Nitrosopumilaceae;uncultured_archaeon	JQ013326.1.914	99.761	0
UNI369	17	26	10	5	28	9	4	5	0	0	0	2	1	0	0	2	0	0	Archaea;Thaumarchaeota;Nitrososphaeria;Nitrosopumilales;Nitrosopumilaceae;uncultured_archaeon	JQ815988.1.1401	99.761	0
UNI1962	23	13	2	5	5	1	1	2	0	0	0	0	0	0	0	1	7	0	Archaea;Thaumarchaeota;Nitrososphaeria;Nitrosopumilales;Nitrosopumilaceae;uncultured_archaeon	FJ571855.1.1345	99.282	0
UNI471	14	9	0	0	58	2	0	0	0	0	0	0	0	0	0	0	0	0	Archaea;Thaumarchaeota;Nitrososphaeria;Nitrosopumilales;Nitrosopumilaceae;uncultured_archaeon	FJ571892.1.1345	99.522	0
UNI224	18	21	34	3	18	19	2	8	0	0	0	18	5	0	0	7	14	0	Archaea;Thaumarchaeota;Nitrososphaeria;Nitrosopumilales;Nitrosopumilaceae;uncultured_archaeon	AB629515.1.913	99.282	0
UNI1431	12	22	1	0	0	0	0	0	0	0	0	3	0	0	0	0	0	0	Archaea;Thaumarchaeota;Nitrososphaeria;Nitrosopumilales;Nitrosopumilaceae;uncultured_archaeon	FJ571868.1.1345	99.282	0
UNI1721	2	13	6	0	0	0	0	3	0	0	0	0	0	0	0	0	3	0	Archaea;Thaumarchaeota;Nitrososphaeria;Nitrosopumilales;Nitrosopumilaceae;uncultured_archaeon	FJ571712.1.1345	99.522	0
UNI97	86	84	28	8	49	21	26	30	0	0	0	7	3	0	0	13	23	0	Archaea;Thaumarchaeota;Nitrososphaeria;Nitrosopumilales;Nitrosopumilaceae;uncultured_archaeon	FJ571929.1.1346	99.761	0
UNI1535	14	20	0	0	11	0	0	0	0	0	0	0	0	0	0	0	0	0	Archaea;Thaumarchaeota;Nitrososphaeria;Nitrosopumilales;Nitrosopumilaceae;uncultured_archaeon	FJ571860.1.1345	98.565	0
UNI525	12	31	5	23	6	1	2	1	0	0	0	1	14	2	0	0	1	0	Archaea;Thaumarchaeota;Nitrososphaeria;Nitrosopumilales;Nitrosopumilaceae;uncultured_archaeon	LC081093.1.1439	99.761	0
UNI974	20	10	0	0	0	0	4	3	0	0	2	2	0	0	0	1	5	0	Archaea;Thaumarchaeota;Nitrososphaeria;Nitrosopumilales;Nitrosopumilaceae;uncultured_archaeon	FJ571874.1.1346	99.282	0
UNI1050	9	12	9	1	12	3	0	0	0	0	0	4	4	0	0	0	0	0	Archaea;Thaumarchaeota;Nitrososphaeria;Nitrosopumilales;Nitrosopumilaceae;uncultured_archaeon	FJ571855.1.1345	99.522	0
UNI1164	9	15	3	11	24	6	4	3	0	0	0	0	3	0	0	2	2	0	Archaea;Thaumarchaeota;Nitrososphaeria;Nitrosopumilales;Nitrosopumilaceae;uncultured_archaeon	FJ571957.1.1345	99.522	0
UNI66	31	45	45	137	22	11	79	38	2	0	0	15	30	0	0	27	33	0	Archaea;Thaumarchaeota;Nitrososphaeria;Nitrosopumilales;Nitrosopumilaceae;uncultured_archaeon	JQ013326.1.914	100	0
UNI695	19	24	0	0	0	18	0	2	6	0	0	0	0	0	0	0	1	0	Archaea;Thaumarchaeota;Nitrososphaeria;Nitrosopumilales;Nitrosopumilaceae;uncultured_archaeon	FJ571831.1.1346	99.282	0
UNI781	15	19	2	0	25	9	0	0	4	0	0	0	0	0	0	0	0	1	Archaea;Thaumarchaeota;Nitrososphaeria;Nitrosopumilales;Nitrosopumilaceae;uncultured_archaeon	FJ571831.1.1346	99.761	0
UNI1106	9	20	10	0	0	0	0	6	0	0	0	2	0	0	0	0	2	0	Archaea;Thaumarchaeota;Nitrososphaeria;Nitrosopumilales;Nitrosopumilaceae;uncultured_archaeon	LC139921.1.900	99.76	0
UNI628	13	30	6	0	0	0	0	5	0	0	0	2	0	0	0	0	5	0	Archaea;Thaumarchaeota;Nitrososphaeria;Nitrosopumilales;Nitrosopumilaceae;uncultured_archaeon	FJ571712.1.1345	99.282	0
UNI400	17	58	11	18	5	2	0	2	0	0	0	3	5	0	0	0	6	0	Archaea;Thaumarchaeota;Nitrososphaeria;Nitrosopumilales;Nitrosopumilaceae;uncultured_archaeon	LC081093.1.1439	99.761	0
UNI174	30	57	20	1	31	13	11	20	0	0	0	5	3	0	0	8	21	0	Archaea;Thaumarchaeota;Nitrososphaeria;Nitrosopumilales;Nitrosopumilaceae;uncultured_archaeon	FJ571929.1.1346	99.522	0
UNI780	4	45	11	8	1	0	0	3	0	0	3	4	5	0	0	0	1	0	Archaea;Thaumarchaeota;Nitrososphaeria;Nitrosopumilales;Nitrosopumilaceae;uncultured_archaeon	FJ571848.1.1346	99.282	0
UNI2742	46	0	0	0	0	1	0	0	0	0	0	0	0	0	0	0	0	0	Archaea;Thaumarchaeota;Nitrososphaeria;Nitrosopumilales;Nitrosopumilaceae;uncultured_archaeon	LC139901.1.900	98.801	0
UNI327	6	7	36	6	3	31	8	19	19	0	0	5	0	0	7	1	14	3	Archaea;Thaumarchaeota;Nitrososphaeria;Nitrosopumilales;Nitrosopumilaceae;uncultured_archaeon	FJ571712.1.1345	99.522	0
UNI370	4	5	24	0	1	0	6	26	0	0	0	13	2	0	0	7	42	0	Archaea;Thaumarchaeota;Nitrososphaeria;Nitrosopumilales;Nitrosopumilaceae;uncultured_archaeon	LC139921.1.900	99.52	0
UNI2664	11	9	1	0	1	2	0	0	0	0	0	0	0	0	0	0	0	0	Archaea;Thaumarchaeota;Nitrososphaeria;Nitrosopumilales;Nitrosopumilaceae;uncultured_archaeon	FJ571706.1.1345	98.565	0
UNI2729	6	15	1	0	0	0	0	0	0	0	0	0	0	0	0	0	0	0	Archaea;Thaumarchaeota;Nitrososphaeria;Nitrosopumilales;Nitrosopumilaceae;uncultured_archaeon	FJ571848.1.1346	98.804	0
UNI2224	4	12	4	0	0	0	0	0	0	0	0	0	1	0	0	1	1	0	Archaea;Thaumarchaeota;Nitrososphaeria;Nitrosopumilales;Nitrosopumilaceae;uncultured_archaeon	JX000671.1.1402	99.043	0
UNI2229	5	3	0	20	0	0	0	0	0	0	0	0	3	0	0	0	0	0	Archaea;Thaumarchaeota;Nitrososphaeria;Nitrosopumilales;Nitrosopumilaceae;uncultured_archaeon	AY627453.1.1126	98.565	0
UNI1740	13	22	0	1	13	0	0	1	0	0	0	0	0	0	0	0	0	0	Archaea;Thaumarchaeota;Nitrososphaeria;Nitrosopumilales;Nitrosopumilaceae;uncultured_archaeon	FJ571860.1.1345	98.804	0
UNI1196	12	3	3	0	10	23	0	2	0	0	0	1	0	0	0	0	0	0	Archaea;Thaumarchaeota;Nitrososphaeria;Nitrosopumilales;Nitrosopumilaceae;uncultured_archaeon	FJ571892.1.1345	99.282	0
UNI507	2	19	0	1	2	24	15	21	1	0	0	0	0	0	0	2	15	0	Archaea;Thaumarchaeota;Nitrososphaeria;Nitrosopumilales;Nitrosopumilaceae;uncultured_archaeon	FJ571920.1.1346	99.761	0
UNI1927	3	8	6	0	1	3	0	2	0	0	0	3	0	0	0	0	0	0	Archaea;Thaumarchaeota;Nitrososphaeria;Nitrosopumilales;Nitrosopumilaceae;uncultured_archaeon	LC080931.1.1441	99.282	0
UNI494	6	12	3	0	30	63	0	0	0	0	0	0	0	0	0	0	1	0	Archaea;Thaumarchaeota;Nitrososphaeria;Nitrosopumilales;Nitrosopumilaceae;uncultured_archaeon	JX000671.1.1402	99.282	0
UNI527	9	23	3	0	21	70	0	0	0	0	0	0	0	0	0	0	0	0	Archaea;Thaumarchaeota;Nitrososphaeria;Nitrosopumilales;Nitrosopumilaceae;uncultured_archaeon	JX000671.1.1402	99.761	0
UNI207	40	33	3	0	62	30	0	2	3	0	1	0	0	0	0	0	1	1	Archaea;Thaumarchaeota;Nitrososphaeria;Nitrosopumilales;Nitrosopumilaceae;uncultured_archaeon	FJ571831.1.1346	99.761	0
UNI2054	4	16	0	0	0	2	1	0	8	0	0	0	0	0	0	0	0	3	Archaea;Thaumarchaeota;Nitrososphaeria;Nitrosopumilales;Nitrosopumilaceae;uncultured_archaeon	FJ571831.1.1346	99.761	0
UNI2602	7	16	1	0	13	0	0	0	0	0	0	0	0	0	0	0	2	0	Archaea;Thaumarchaeota;Nitrososphaeria;Nitrosopumilales;Nitrosopumilaceae;uncultured_archaeon	FJ571855.1.1345	99.282	0
UNI1149	5	7	1	30	4	2	0	4	0	0	0	0	10	0	0	0	3	0	Archaea;Thaumarchaeota;Nitrososphaeria;Nitrosopumilales;Nitrosopumilaceae;uncultured_archaeon	FJ571957.1.1345	99.522	0
UNI2929	9	7	0	0	0	0	0	2	0	0	0	0	0	0	0	0	0	0	Archaea;Thaumarchaeota;Nitrososphaeria;Nitrosopumilales;Nitrosopumilaceae;uncultured_archaeon	FJ571848.1.1346	99.043	0
UNI665	15	22	1	0	1	18	0	0	7	0	0	0	0	0	0	0	0	2	Archaea;Thaumarchaeota;Nitrososphaeria;Nitrosopumilales;Nitrosopumilaceae;uncultured_archaeon	FJ571831.1.1346	99.522	0
UNI1987	5	6	1	0	0	6	0	1	0	0	0	0	0	0	0	0	0	1	Archaea;Thaumarchaeota;Nitrososphaeria;Nitrosopumilales;Nitrosopumilaceae;uncultured_archaeon	FJ571712.1.1345	99.522	0
UNI2219	5	0	19	10	0	0	0	0	0	0	0	11	6	0	0	2	0	0	Archaea;Thaumarchaeota;Nitrososphaeria;Nitrosopumilales;Nitrosopumilaceae;uncultured_archaeon	FJ571848.1.1346	99.043	0
UNI3511	7	10	0	1	17	0	0	0	0	0	0	0	0	0	0	0	0	0	Archaea;Thaumarchaeota;Nitrososphaeria;Nitrosopumilales;Nitrosopumilaceae;uncultured_archaeon	LC139937.1.900	99.76	0
UNI1971	6	14	0	0	6	6	0	2	1	0	0	0	0	0	0	0	0	0	Archaea;Thaumarchaeota;Nitrososphaeria;Nitrosopumilales;Nitrosopumilaceae;uncultured_archaeon	FJ571929.1.1346	99.522	0
UNI50	41	50	37	148	25	9	92	48	2	0	0	22	33	0	0	31	38	0	Archaea;Thaumarchaeota;Nitrososphaeria;Nitrosopumilales;Nitrosopumilaceae;uncultured_archaeon	JQ013326.1.914	99.761	0
UNI535	6	4	2	37	0	0	3	0	0	0	0	2	31	0	0	10	0	0	Archaea;Thaumarchaeota;Nitrososphaeria;Nitrosopumilales;Nitrosopumilaceae;uncultured_archaeon	LC139939.1.900	99.041	0
UNI359	15	25	10	45	35	3	6	5	0	0	0	9	11	0	0	1	2	0	Archaea;Thaumarchaeota;Nitrososphaeria;Nitrosopumilales;Nitrosopumilaceae;uncultured_archaeon	FJ571957.1.1345	100	0
UNI257	13	27	4	0	39	95	0	2	0	0	0	1	0	0	0	0	1	0	Archaea;Thaumarchaeota;Nitrososphaeria;Nitrosopumilales;Nitrosopumilaceae;uncultured_archaeon	JX000671.1.1402	99.522	0
UNI802	8	15	20	1	16	5	5	3	0	0	0	2	0	0	0	0	4	0	Archaea;Thaumarchaeota;Nitrososphaeria;Nitrosopumilales;Nitrosopumilaceae;uncultured_archaeon	AB629515.1.913	99.282	0
UNI840	13	32	2	1	17	8	2	3	0	0	0	0	0	0	0	1	1	0	Archaea;Thaumarchaeota;Nitrososphaeria;Nitrosopumilales;Nitrosopumilaceae;uncultured_archaeon	JX870219.1.915	99.282	0
UNI441	17	19	18	3	22	6	3	3	0	0	0	8	4	0	0	5	0	0	Archaea;Thaumarchaeota;Nitrososphaeria;Nitrosopumilales;Nitrosopumilaceae;uncultured_archaeon	AB629515.1.913	99.522	0
UNI1642	8	8	6	6	12	7	2	1	0	0	0	0	3	0	0	0	4	0	Archaea;Thaumarchaeota;Nitrososphaeria;Nitrosopumilales;Nitrosopumilaceae;uncultured_archaeon	FJ571855.1.1345	99.761	0
UNI1246	2	0	17	3	0	0	2	4	0	0	0	4	1	1	0	0	8	0	Archaea;Thaumarchaeota;Nitrososphaeria;Nitrosopumilales;Nitrosopumilaceae;uncultured_archaeon	JQ013326.1.914	99.522	0
UNI284	32	28	5	1	59	19	0	2	6	0	0	0	0	0	0	0	0	0	Archaea;Thaumarchaeota;Nitrososphaeria;Nitrosopumilales;Nitrosopumilaceae;uncultured_archaeon	FJ571831.1.1346	100	0
UNI563	11	51	3	14	3	1	0	2	0	0	0	2	4	2	0	0	2	0	Archaea;Thaumarchaeota;Nitrososphaeria;Nitrosopumilales;Nitrosopumilaceae;uncultured_archaeon	LC081093.1.1439	100	0
UNI592	4	19	3	2	0	2	9	5	0	0	0	1	0	0	0	14	21	0	Archaea;Thaumarchaeota;Nitrososphaeria;Nitrosopumilales;Nitrosopumilaceae;uncultured_archaeon	FJ571965.1.1346	99.282	0
UNI550	11	9	18	13	7	8	0	1	0	0	0	5	9	0	0	3	0	0	Archaea;Thaumarchaeota;Nitrososphaeria;Nitrosopumilales;Nitrosopumilaceae;uncultured_archaeon	LC080931.1.1441	99.522	0
UNI1527	6	7	2	0	0	13	0	0	2	0	0	0	0	0	0	0	0	0	Archaea;Thaumarchaeota;Nitrososphaeria;Nitrosopumilales;Nitrosopumilaceae;uncultured_archaeon	FJ571831.1.1346	99.522	0
UNI848	10	8	9	2	25	3	5	13	0	0	0	2	5	0	0	1	12	0	Archaea;Thaumarchaeota;Nitrososphaeria;Nitrosopumilales;Nitrosopumilaceae;uncultured_archaeon	GQ994288.1.939	99.522	0
UNI1558	10	8	2	0	41	0	2	0	0	0	0	0	0	0	0	0	1	0	Archaea;Thaumarchaeota;Nitrososphaeria;Nitrosopumilales;Nitrosopumilaceae;uncultured_archaeon	FJ571957.1.1345	99.522	0
UNI2553	15	7	0	0	22	0	0	0	0	0	3	0	0	0	0	0	0	0	Archaea;Thaumarchaeota;Nitrososphaeria;Nitrosopumilales;Nitrosopumilaceae;uncultured_archaeon	LC139937.1.900	99.52	0
UNI928	9	21	2	0	11	23	0	1	0	0	0	0	0	0	0	0	0	0	Archaea;Thaumarchaeota;Nitrososphaeria;Nitrosopumilales;Nitrosopumilaceae;uncultured_archaeon	FJ571874.1.1346	99.522	0
UNI1181	10	22	9	7	0	1	0	0	0	0	0	4	3	0	0	0	0	0	Archaea;Thaumarchaeota;Nitrososphaeria;Nitrosopumilales;Nitrosopumilaceae;uncultured_archaeon	FJ571874.1.1346	100	0
UNI1677	28	3	0	4	25	1	0	0	0	0	0	0	3	0	0	0	0	0	Archaea;Thaumarchaeota;Nitrososphaeria;Nitrosopumilales;Nitrosopumilaceae;uncultured_archaeon	AY627453.1.1126	98.565	0
UNI428	21	44	2	0	14	15	1	7	0	0	0	5	0	2	0	0	2	0	Archaea;Thaumarchaeota;Nitrososphaeria;Nitrosopumilales;Nitrosopumilaceae;uncultured_archaeon	FJ571929.1.1346	99.282	0
UNI923	6	6	26	5	0	0	0	0	0	0	0	22	4	0	0	0	0	0	Archaea;Thaumarchaeota;Nitrososphaeria;Nitrosopumilales;Nitrosopumilaceae;uncultured_archaeon	FJ571848.1.1346	98.804	0
UNI2430	17	14	1	0	3	1	2	0	0	0	0	0	0	0	0	0	0	0	Archaea;Thaumarchaeota;Nitrososphaeria;Nitrosopumilales;Nitrosopumilaceae;uncultured_archaeon	FJ571706.1.1345	98.565	0
UNI797	8	6	0	0	46	0	0	0	0	0	0	0	0	0	0	0	0	0	Archaea;Thaumarchaeota;Nitrososphaeria;Nitrosopumilales;Nitrosopumilaceae;uncultured_archaeon	FJ571892.1.1345	99.043	0
UNI3519	3	4	4	12	9	0	0	0	0	0	0	2	2	0	0	0	0	0	Archaea;Thaumarchaeota;Nitrososphaeria;Nitrosopumilales;Nitrosopumilaceae;uncultured_archaeon	KM454187.1.915	99.522	0
UNI1171	6	1	0	0	18	29	0	0	0	0	0	0	3	0	0	0	0	0	Archaea;Thaumarchaeota;Nitrososphaeria;Nitrosopumilales;Nitrosopumilaceae;uncultured_archaeon	AY627432.1.1147	99.761	0
UNI1617	12	23	0	0	8	2	3	0	0	0	0	0	0	0	0	0	0	0	Archaea;Thaumarchaeota;Nitrososphaeria;Nitrosopumilales;Nitrosopumilaceae;uncultured_archaeon	FJ571855.1.1345	99.043	0
UNI2740	6	7	6	9	4	0	0	0	0	0	0	3	0	0	0	0	0	0	Archaea;Thaumarchaeota;Nitrososphaeria;Nitrosopumilales;Nitrosopumilaceae;uncultured_archaeon	KM454187.1.915	99.282	0
UNI389	21	58	2	1	36	5	2	6	0	0	0	0	0	0	0	2	12	0	Archaea;Thaumarchaeota;Nitrososphaeria;Nitrosopumilales;Nitrosopumilaceae;uncultured_archaeon	JX870219.1.915	99.522	0
UNI1916	2	12	0	3	0	0	0	0	0	0	0	0	0	0	0	0	0	0	Archaea;Thaumarchaeota;Nitrososphaeria;Nitrosopumilales;Nitrosopumilaceae;uncultured_archaeon	LC081093.1.1439	99.522	0
UNI3052	7	14	0	1	3	0	0	0	0	0	0	0	0	0	0	0	0	0	Archaea;Thaumarchaeota;Nitrososphaeria;Nitrosopumilales;Nitrosopumilaceae;uncultured_archaeon	FJ571855.1.1345	99.282	0
UNI1563	4	2	1	26	4	2	1	1	0	0	0	0	4	0	0	0	1	0	Archaea;Thaumarchaeota;Nitrososphaeria;Nitrosopumilales;Nitrosopumilaceae;uncultured_archaeon	FJ571957.1.1345	99.761	0
UNI3271	6	5	0	0	1	3	0	0	0	0	0	0	0	0	0	0	0	0	Archaea;Thaumarchaeota;Nitrososphaeria;Nitrosopumilales;Nitrosopumilaceae;uncultured_archaeon	KM454185.1.915	99.761	0
UNI1450	17	12	0	1	7	0	0	0	0	0	0	0	1	0	0	0	0	0	Archaea;Thaumarchaeota;Nitrososphaeria;Nitrosopumilales;Nitrosopumilaceae;uncultured_archaeon	JQ327920.1.920	99.522	0
UNI1739	5	5	0	10	3	1	0	1	0	0	0	0	2	0	0	0	3	0	Archaea;Thaumarchaeota;Nitrososphaeria;Nitrosopumilales;Nitrosopumilaceae;uncultured_archaeon	FJ571957.1.1345	99.282	0
UNI530	8	18	0	0	24	44	0	0	0	0	0	1	0	0	0	0	0	0	Archaea;Thaumarchaeota;Nitrososphaeria;Nitrosopumilales;Nitrosopumilaceae;uncultured_archaeon	JX000671.1.1402	99.761	0
UNI130	31	47	35	27	19	4	59	31	2	0	0	6	13	0	0	14	13	0	Archaea;Thaumarchaeota;Nitrososphaeria;Nitrosopumilales;Nitrosopumilaceae;uncultured_archaeon	JQ013326.1.914	99.522	0
UNI2202	14	6	3	5	4	0	6	3	0	0	0	0	0	0	0	3	7	0	Archaea;Thaumarchaeota;Nitrososphaeria;Nitrosopumilales;Nitrosopumilaceae;uncultured_archaeon	FJ571855.1.1345	99.522	0
UNI479	9	11	22	6	1	16	3	3	0	0	0	10	10	0	0	4	0	0	Archaea;Thaumarchaeota;Nitrososphaeria;Nitrosopumilales;Nitrosopumilaceae;uncultured_archaeon	LC080931.1.1441	99.282	0
UNI3072	5	2	0	0	5	5	0	0	0	0	0	0	0	0	0	0	0	0	Archaea;Thaumarchaeota;Nitrososphaeria;Nitrosopumilales;Nitrosopumilaceae;uncultured_archaeon	FJ571874.1.1346	99.522	0
UNI664	14	29	0	0	7	10	0	3	0	0	0	1	0	0	0	0	2	0	Archaea;Thaumarchaeota;Nitrososphaeria;Nitrosopumilales;Nitrosopumilaceae;uncultured_archaeon	FJ571929.1.1346	99.522	0
UNI2685	9	10	1	0	16	0	0	0	0	0	0	0	0	0	0	0	0	0	Archaea;Thaumarchaeota;Nitrososphaeria;Nitrosopumilales;Nitrosopumilaceae;uncultured_archaeon	LC139937.1.900	99.52	0
UNI1832	4	7	0	0	12	15	0	0	0	0	0	0	0	0	0	0	0	0	Archaea;Thaumarchaeota;Nitrososphaeria;Nitrosopumilales;Nitrosopumilaceae;uncultured_archaeon	JX000671.1.1402	99.522	0
UNI1384	9	32	0	1	0	0	0	0	0	0	0	0	0	0	0	0	0	0	Archaea;Thaumarchaeota;Nitrososphaeria;Nitrosopumilales;Nitrosopumilaceae;uncultured_archaeon	FJ571868.1.1345	99.282	0
UNI843	11	22	11	6	34	4	11	13	0	0	0	2	5	0	0	5	12	0	Archaea;Thaumarchaeota;Nitrososphaeria;Nitrosopumilales;Nitrosopumilaceae;uncultured_archaeon	GQ994288.1.939	99.282	0
UNI273	14	27	26	8	32	18	19	5	0	0	0	3	1	0	0	7	2	0	Archaea;Thaumarchaeota;Nitrososphaeria;Nitrosopumilales;Nitrosopumilaceae;uncultured_archaeon	JQ815988.1.1401	99.522	0
UNI346	9	11	37	8	8	21	4	32	20	0	0	6	0	0	1	0	11	4	Archaea;Thaumarchaeota;Nitrososphaeria;Nitrosopumilales;Nitrosopumilaceae;uncultured_archaeon	LC139921.1.900	99.76	0
UNI977	10	21	1	0	11	3	0	3	0	0	2	2	0	0	0	0	6	0	Archaea;Thaumarchaeota;Nitrososphaeria;Nitrosopumilales;Nitrosopumilaceae;uncultured_archaeon	FJ571965.1.1346	99.761	0
UNI824	18	3	1	2	33	30	0	3	0	0	0	0	5	0	0	0	3	0	Archaea;Thaumarchaeota;Nitrososphaeria;Nitrosopumilales;Nitrosopumilaceae;uncultured_archaeon	LC139788.1.900	99.52	0
UNI846	12	20	10	1	11	4	2	0	0	0	0	4	4	0	0	1	0	0	Archaea;Thaumarchaeota;Nitrososphaeria;Nitrosopumilales;Nitrosopumilaceae;uncultured_archaeon	FJ571855.1.1345	99.522	0
UNI1455	10	25	2	1	0	0	0	0	0	0	0	0	0	0	0	0	0	0	Archaea;Thaumarchaeota;Nitrososphaeria;Nitrosopumilales;Nitrosopumilaceae;uncultured_archaeon	JX000671.1.1402	99.282	0
UNI1867	8	0	0	0	47	62	0	0	0	0	0	0	0	0	0	0	1	0	Archaea;Thaumarchaeota;Nitrososphaeria;Nitrosopumilales;Nitrosopumilaceae;uncultured_archaeon	KP204798.1.1396	99.282	0
UNI2337	24	21	4	0	3	2	1	4	0	0	0	0	0	0	0	0	0	0	Archaea;Thaumarchaeota;Nitrososphaeria;Nitrosopumilales;Nitrosopumilaceae;uncultured_archaeon	FJ571706.1.1345	98.804	0
UNI293	15	25	13	56	26	10	11	4	0	0	0	5	29	0	0	3	3	0	Archaea;Thaumarchaeota;Nitrososphaeria;Nitrosopumilales;Nitrosopumilaceae;uncultured_archaeon	FJ571957.1.1345	99.761	0
UNI596	13	43	3	0	14	13	1	2	0	0	0	1	0	0	0	0	1	0	Archaea;Thaumarchaeota;Nitrososphaeria;Nitrosopumilales;Nitrosopumilaceae;uncultured_archaeon	FJ571929.1.1346	99.761	0
UNI823	2	3	0	0	22	40	0	0	0	0	0	0	2	0	0	0	0	0	Archaea;Thaumarchaeota;Nitrososphaeria;Nitrosopumilales;Nitrosopumilaceae;uncultured_archaeon	AY627432.1.1147	99.522	0
UNI2829	7	1	0	0	39	8	0	0	0	0	0	0	0	0	0	0	0	0	Archaea;Thaumarchaeota;Nitrososphaeria;Nitrosopumilales;Nitrosopumilaceae;uncultured_archaeon	LC139742.1.900	99.041	0
UNI1459	8	20	0	0	0	0	0	0	0	0	0	0	0	0	0	0	0	0	Archaea;Thaumarchaeota;Nitrososphaeria;Nitrosopumilales;Nitrosopumilaceae;uncultured_archaeon	LC081093.1.1439	99.522	0
UNI255	19	32	14	44	19	13	9	7	0	0	0	5	27	0	0	8	8	0	Archaea;Thaumarchaeota;Nitrososphaeria;Nitrosopumilales;Nitrosopumilaceae;uncultured_archaeon	FJ571957.1.1345	99.522	0
UNI263	6	21	0	0	2	41	16	45	0	0	0	0	0	0	0	7	29	0	Archaea;Thaumarchaeota;Nitrososphaeria;Nitrosopumilales;Nitrosopumilaceae;uncultured_archaeon	FJ571920.1.1346	99.761	0
UNI2023	8	18	3	2	17	1	0	3	0	0	0	0	0	0	0	0	0	0	Archaea;Thaumarchaeota;Nitrososphaeria;Nitrosopumilales;Nitrosopumilaceae;uncultured_archaeon	JX870219.1.915	99.522	0
UNI2015	2	2	6	0	6	23	0	1	1	0	0	0	0	0	0	0	0	1	Archaea;Thaumarchaeota;Nitrososphaeria;Nitrosopumilales;Nitrosopumilaceae;uncultured_archaeon	FJ571929.1.1346	99.043	0
UNI2432	4	4	0	20	0	0	0	0	0	0	0	0	3	0	0	0	0	0	Archaea;Thaumarchaeota;Nitrososphaeria;Nitrosopumilales;Nitrosopumilaceae;uncultured_archaeon	LC081092.1.1441	99.523	0
UNI2437	4	9	4	0	0	0	0	0	0	0	0	2	0	0	0	0	0	0	Archaea;Thaumarchaeota;Nitrososphaeria;Nitrosopumilales;Nitrosopumilaceae;uncultured_archaeon	JX000671.1.1402	99.522	0
UNI344	16	15	21	10	34	14	1	6	0	0	0	7	3	0	0	2	7	0	Archaea;Thaumarchaeota;Nitrososphaeria;Nitrosopumilales;Nitrosopumilaceae;uncultured_archaeon	AB629515.1.913	99.522	0
UNI2872	7	4	1	0	0	0	0	0	0	0	0	0	0	0	0	0	0	0	Archaea;Thaumarchaeota;Nitrososphaeria;Nitrosopumilales;Nitrosopumilaceae;uncultured_archaeon	FJ571848.1.1346	99.282	0
UNI783	5	0	24	0	0	0	9	12	1	0	0	3	1	0	0	4	12	0	Archaea;Thaumarchaeota;Nitrososphaeria;Nitrosopumilales;Nitrosopumilaceae;uncultured_archaeon	LC139921.1.900	99.76	0
UNI1272	8	2	0	0	12	31	0	0	0	0	0	0	0	0	0	0	0	0	Archaea;Thaumarchaeota;Nitrososphaeria;Nitrosopumilales;Nitrosopumilaceae;uncultured_archaeon	JX000671.1.1402	99.522	0
UNI3272	1	2	3	4	0	0	1	0	0	0	0	1	1	0	0	0	1	0	Archaea;Thaumarchaeota;Nitrososphaeria;Nitrosopumilales;Nitrosopumilaceae;uncultured_archaeon	FJ571960.1.1345	99.761	0
UNI335	2	4	36	1	1	0	14	17	1	0	0	14	3	0	0	12	46	1	Archaea;Thaumarchaeota;Nitrososphaeria;Nitrosopumilales;Nitrosopumilaceae;uncultured_archaeon	FJ571712.1.1345	99.282	0
UNI393	11	17	22	7	27	6	2	4	0	0	0	4	1	0	0	2	3	0	Archaea;Thaumarchaeota;Nitrososphaeria;Nitrosopumilales;Nitrosopumilaceae;uncultured_archaeon	AB629515.1.913	99.761	0
UNI2358	8	4	4	0	4	14	0	0	0	0	0	0	0	0	0	0	0	0	Archaea;Thaumarchaeota;Nitrososphaeria;Nitrosopumilales;Nitrosopumilaceae;uncultured_archaeon	FJ571892.1.1345	99.522	0
UNI1394	3	0	15	21	0	0	0	0	0	0	0	6	4	0	0	1	0	0	Archaea;Thaumarchaeota;Nitrososphaeria;Nitrosopumilales;Nitrosopumilaceae;uncultured_archaeon	FJ571829.1.1346	99.522	0
UNI3231	4	0	5	3	0	0	0	0	0	0	0	1	0	0	0	0	1	0	Archaea;Thaumarchaeota;Nitrososphaeria;Nitrosopumilales;Nitrosopumilaceae;uncultured_archaeon	FJ571965.1.1346	99.282	0
UNI3443	4	10	0	0	0	0	0	0	0	0	0	0	0	0	0	0	0	0	Archaea;Thaumarchaeota;Nitrososphaeria;Nitrosopumilales;Nitrosopumilaceae;uncultured_archaeon	FJ571868.1.1345	99.522	0
UNI2450	8	7	1	2	38	3	2	2	0	0	0	0	0	0	0	0	0	0	Archaea;Thaumarchaeota;Nitrososphaeria;Nitrosopumilales;Nitrosopumilaceae;uncultured_archaeon	FJ571957.1.1345	99.522	0
UNI653	10	38	4	0	1	0	0	7	0	0	0	1	0	0	0	0	3	0	Archaea;Thaumarchaeota;Nitrososphaeria;Nitrosopumilales;Nitrosopumilaceae;uncultured_archaeon	LC139921.1.900	99.52	0
UNI776	11	27	9	4	15	10	1	3	0	0	0	5	7	0	0	3	4	0	Archaea;Thaumarchaeota;Nitrososphaeria;Nitrosopumilales;Nitrosopumilaceae;uncultured_archaeon	FJ571855.1.1345	99.282	0
UNI2095	1	1	0	17	0	0	0	0	0	0	0	0	1	0	0	0	0	0	Archaea;Thaumarchaeota;Nitrososphaeria;Nitrosopumilales;Nitrosopumilaceae;uncultured_archaeon	AY627453.1.1126	98.565	0
UNI360	13	49	8	9	4	3	0	4	0	0	0	10	9	0	0	0	3	0	Archaea;Thaumarchaeota;Nitrososphaeria;Nitrosopumilales;Nitrosopumilaceae;uncultured_archaeon	LC081093.1.1439	99.522	0
UNI2659	9	7	0	22	0	0	0	0	0	0	0	0	5	0	0	0	0	0	Archaea;Thaumarchaeota;Nitrososphaeria;Nitrosopumilales;Nitrosopumilaceae;uncultured_archaeon	LC081092.1.1441	99.284	0
UNI1975	8	2	0	1	14	1	0	0	0	0	0	0	0	0	0	0	0	0	Archaea;Thaumarchaeota;Nitrososphaeria;Nitrosopumilales;Nitrosopumilaceae;uncultured_archaeon	AY627453.1.1126	98.804	0
UNI2673	7	11	0	0	0	0	0	0	0	0	0	0	0	0	0	0	0	0	Archaea;Thaumarchaeota;Nitrososphaeria;Nitrosopumilales;Nitrosopumilaceae;uncultured_archaeon	FJ571848.1.1346	99.043	0
UNI3023	1	6	6	0	2	2	2	0	0	0	0	1	0	0	0	0	0	0	Archaea;Thaumarchaeota;Nitrososphaeria;Nitrosopumilales;Nitrosopumilaceae;uncultured_archaeon	AB629515.1.913	99.522	0
UNI443	11	12	18	14	5	6	2	3	0	0	0	10	9	0	0	5	0	0	Archaea;Thaumarchaeota;Nitrososphaeria;Nitrosopumilales;Nitrosopumilaceae;uncultured_archaeon	LC080931.1.1441	99.522	0
UNI932	7	30	5	9	2	0	1	5	1	0	0	3	4	0	0	0	0	0	Archaea;Thaumarchaeota;Nitrososphaeria;Nitrosopumilales;Nitrosopumilaceae;uncultured_archaeon	FJ571848.1.1346	99.282	0
UNI3382	7	9	0	0	9	0	0	0	0	0	0	0	0	0	0	0	0	0	Archaea;Thaumarchaeota;Nitrososphaeria;Nitrosopumilales;Nitrosopumilaceae;uncultured_archaeon	FJ571860.1.1345	98.565	0
UNI1012	2	6	10	13	0	2	1	1	0	0	0	7	5	0	0	0	0	0	Archaea;Thaumarchaeota;Nitrososphaeria;Nitrosopumilales;Nitrosopumilaceae;uncultured_archaeon	LC080931.1.1441	99.761	0
UNI3415	4	8	0	0	40	6	0	0	0	0	0	0	0	0	0	0	0	0	Archaea;Thaumarchaeota;Nitrososphaeria;Nitrosopumilales;Nitrosopumilaceae;uncultured_archaeon	FJ571860.1.1345	99.522	0
UNI1722	1	12	2	0	9	1	0	0	0	0	0	0	0	0	0	0	0	0	Archaea;Thaumarchaeota;Nitrososphaeria;Nitrosopumilales;Nitrosopumilaceae;uncultured_archaeon	FJ571965.1.1346	99.522	0
UNI1978	8	12	1	0	4	2	0	0	0	0	0	0	0	0	0	0	0	0	Archaea;Thaumarchaeota;Nitrososphaeria;Nitrosopumilales;Nitrosopumilaceae;uncultured_archaeon	FJ571874.1.1346	99.522	0
UNI870	3	13	3	0	31	16	2	1	2	0	0	1	0	0	0	0	0	2	Archaea;Thaumarchaeota;Nitrososphaeria;Nitrosopumilales;Nitrosopumilaceae;uncultured_archaeon	AB629515.1.913	99.761	0
UNI3341	3	3	1	0	5	1	0	0	0	0	0	0	0	0	0	0	0	0	Archaea;Thaumarchaeota;Nitrososphaeria;Nitrosopumilales;Nitrosopumilaceae;uncultured_archaeon	FJ571855.1.1345	99.522	0
UNI630	6	5	17	12	1	23	3	13	9	0	0	4	0	0	3	0	5	4	Archaea;Thaumarchaeota;Nitrososphaeria;Nitrosopumilales;Nitrosopumilaceae;uncultured_archaeon	LC139921.1.900	100	0
UNI618	3	8	26	10	3	14	7	20	6	0	0	7	0	0	1	1	5	3	Archaea;Thaumarchaeota;Nitrososphaeria;Nitrosopumilales;Nitrosopumilaceae;uncultured_archaeon	FJ571712.1.1345	99.761	0
UNI2744	13	1	0	0	13	0	0	0	0	0	0	0	0	0	0	0	0	0	Archaea;Thaumarchaeota;Nitrososphaeria;Nitrosopumilales;Nitrosopumilaceae;uncultured_archaeon	AY627453.1.1126	99.043	0
UNI652	4	1	10	5	1	0	16	13	2	0	0	4	0	0	0	12	24	1	Archaea;Thaumarchaeota;Nitrososphaeria;Nitrosopumilales;Nitrosopumilaceae;uncultured_archaeon	FJ571848.1.1346	99.043	0
UNI324	3	12	0	1	39	75	0	0	0	0	0	0	0	0	0	0	0	1	Archaea;Thaumarchaeota;Nitrososphaeria;Nitrosopumilales;Nitrosopumilaceae;uncultured_archaeon	JX000671.1.1402	99.522	0
UNI1754	7	6	2	0	15	0	3	1	0	0	0	0	0	0	0	0	2	0	Archaea;Thaumarchaeota;Nitrososphaeria;Nitrosopumilales;Nitrosopumilaceae;uncultured_archaeon	FJ571957.1.1345	99.282	0
UNI2527	1	5	6	7	5	0	4	0	0	0	0	3	2	0	0	0	1	0	Archaea;Thaumarchaeota;Nitrososphaeria;Nitrosopumilales;Nitrosopumilaceae;uncultured_archaeon	FJ571960.1.1345	99.522	0
UNI1401	2	9	0	0	16	10	3	0	3	0	0	0	0	0	0	0	1	2	Archaea;Thaumarchaeota;Nitrososphaeria;Nitrosopumilales;Nitrosopumilaceae;uncultured_archaeon	AB629515.1.913	99.522	0
UNI723	3	7	14	0	0	0	9	13	0	0	0	6	0	0	0	8	17	0	Archaea;Thaumarchaeota;Nitrososphaeria;Nitrosopumilales;Nitrosopumilaceae;uncultured_archaeon	FJ571712.1.1345	99.522	0
UNI644	5	10	4	0	20	20	1	0	7	0	0	1	0	0	0	1	6	2	Archaea;Thaumarchaeota;Nitrososphaeria;Nitrosopumilales;Nitrosopumilaceae;uncultured_archaeon	AB629515.1.913	99.522	0
UNI1467	13	4	0	1	6	4	0	0	0	0	0	0	0	0	0	0	0	0	Archaea;Thaumarchaeota;Nitrososphaeria;Nitrosopumilales;Nitrosopumilaceae;uncultured_archaeon	KM454185.1.915	99.522	0
UNI1768	7	9	2	10	25	11	0	0	0	0	0	0	0	0	0	0	0	0	Archaea;Thaumarchaeota;Nitrososphaeria;Nitrosopumilales;Nitrosopumilaceae;uncultured_archaeon	LC139939.1.900	99.52	0
UNI2167	4	4	0	0	13	17	0	0	0	0	0	0	0	0	0	0	0	0	Archaea;Thaumarchaeota;Nitrososphaeria;Nitrosopumilales;Nitrosopumilaceae;uncultured_archaeon	AY627432.1.1147	99.522	0
UNI3080	2	8	2	0	0	0	2	2	0	0	0	0	0	0	0	9	3	0	Archaea;Thaumarchaeota;Nitrososphaeria;Nitrosopumilales;Nitrosopumilaceae;uncultured_archaeon	AY627452.1.1194	98.565	0
UNI1836	6	14	2	10	1	0	0	1	0	0	0	1	0	0	0	0	0	0	Archaea;Thaumarchaeota;Nitrososphaeria;Nitrosopumilales;Nitrosopumilaceae;uncultured_archaeon	LC081093.1.1439	99.761	0
UNI1496	5	25	3	4	5	1	0	0	0	0	0	0	1	0	0	0	0	0	Archaea;Thaumarchaeota;Nitrososphaeria;Nitrosopumilales;Nitrosopumilaceae;uncultured_archaeon	LC081093.1.1439	99.522	0
UNI544	24	38	3	1	29	5	0	6	0	0	0	0	0	0	0	1	3	0	Archaea;Thaumarchaeota;Nitrososphaeria;Nitrosopumilales;Nitrosopumilaceae;uncultured_archaeon	LC139932.1.900	99.76	0
UNI1192	5	21	1	1	5	7	1	1	0	0	0	3	0	0	0	0	2	0	Archaea;Thaumarchaeota;Nitrososphaeria;Nitrosopumilales;Nitrosopumilaceae;uncultured_archaeon	FJ571929.1.1346	99.282	0
UNI2194	4	10	1	0	0	0	2	2	0	0	0	0	0	0	0	0	1	0	Archaea;Thaumarchaeota;Nitrososphaeria;Nitrosopumilales;Nitrosopumilaceae;uncultured_archaeon	FJ571874.1.1346	99.043	0
UNI1325	3	7	4	16	20	3	7	8	0	0	0	2	3	0	0	0	3	0	Archaea;Thaumarchaeota;Nitrososphaeria;Nitrosopumilales;Nitrosopumilaceae;uncultured_archaeon	GQ994288.1.939	99.761	0
UNI588	4	4	26	11	0	0	0	0	0	0	2	21	9	0	0	1	0	0	Archaea;Thaumarchaeota;Nitrososphaeria;Nitrosopumilales;Nitrosopumilaceae;uncultured_archaeon	FJ571829.1.1346	99.043	0
UNI2621	3	14	4	0	0	0	0	0	0	0	0	0	0	0	0	0	0	0	Archaea;Thaumarchaeota;Nitrososphaeria;Nitrosopumilales;Nitrosopumilaceae;uncultured_archaeon	JX000671.1.1402	99.522	0
UNI606	4	12	1	0	18	46	0	0	0	0	0	0	0	0	0	0	0	0	Archaea;Thaumarchaeota;Nitrososphaeria;Nitrosopumilales;Nitrosopumilaceae;uncultured_archaeon	JX000671.1.1402	99.282	0
UNI2536	1	1	0	25	0	0	0	0	0	0	0	0	0	0	0	0	0	0	Archaea;Thaumarchaeota;Nitrososphaeria;Nitrosopumilales;Nitrosopumilaceae;uncultured_archaeon	AY627453.1.1126	98.804	0
UNI2356	4	11	0	37	0	0	0	0	0	0	0	0	11	0	0	0	0	0	Archaea;Thaumarchaeota;Nitrososphaeria;Nitrosopumilales;Nitrosopumilaceae;uncultured_archaeon	LC081092.1.1441	99.284	0
UNI1672	1	0	7	10	0	0	1	1	0	0	0	0	11	0	0	0	5	0	Archaea;Thaumarchaeota;Nitrososphaeria;Nitrosopumilales;Nitrosopumilaceae;uncultured_archaeon	FJ571848.1.1346	98.804	0
UNI1438	7	2	1	1	14	16	1	2	0	0	0	0	3	0	0	0	0	0	Archaea;Thaumarchaeota;Nitrososphaeria;Nitrosopumilales;Nitrosopumilaceae;uncultured_archaeon	LC139788.1.900	99.76	0
UNI2000	2	5	0	0	8	21	0	0	1	0	0	0	0	0	0	0	0	0	Archaea;Thaumarchaeota;Nitrososphaeria;Nitrosopumilales;Nitrosopumilaceae;uncultured_archaeon	JX000671.1.1402	99.761	0
UNI192	10	32	0	0	5	50	15	39	0	0	0	0	0	0	0	9	39	0	Archaea;Thaumarchaeota;Nitrososphaeria;Nitrosopumilales;Nitrosopumilaceae;uncultured_archaeon	FJ571920.1.1346	99.522	0
UNI1014	1	0	20	3	0	0	1	5	0	0	0	8	0	3	0	0	12	0	Archaea;Thaumarchaeota;Nitrososphaeria;Nitrosopumilales;Nitrosopumilaceae;uncultured_archaeon	FJ571712.1.1345	99.282	0
UNI557	1	0	18	29	6	7	8	1	0	0	0	4	10	0	0	0	0	0	Archaea;Thaumarchaeota;Nitrososphaeria;Nitrosopumilales;Nitrosopumilaceae;uncultured_archaeon	FJ571863.1.1345	99.761	0
UNI2442	3	4	0	9	2	7	2	2	0	0	0	0	4	0	0	3	5	0	Archaea;Thaumarchaeota;Nitrososphaeria;Nitrosopumilales;Nitrosopumilaceae;uncultured_archaeon	FJ571832.1.1345	99.282	0
UNI419	3	27	0	0	4	14	11	28	0	0	0	0	0	0	0	2	20	0	Archaea;Thaumarchaeota;Nitrososphaeria;Nitrosopumilales;Nitrosopumilaceae;uncultured_archaeon	FJ571920.1.1346	100	0
UNI1503	2	3	8	4	2	10	3	6	2	0	0	0	0	0	0	0	0	0	Archaea;Thaumarchaeota;Nitrososphaeria;Nitrosopumilales;Nitrosopumilaceae;uncultured_archaeon	FJ571712.1.1345	100	0
UNI1480	2	6	7	7	11	1	3	7	0	0	0	3	4	0	0	2	6	0	Archaea;Thaumarchaeota;Nitrososphaeria;Nitrosopumilales;Nitrosopumilaceae;uncultured_archaeon	GQ994288.1.939	99.522	0
UNI993	9	3	13	1	0	0	0	0	0	0	0	21	5	0	0	0	0	0	Archaea;Thaumarchaeota;Nitrososphaeria;Nitrosopumilales;Nitrosopumilaceae;uncultured_archaeon	FJ571848.1.1346	99.043	0
UNI1772	10	8	2	1	6	1	0	1	0	0	0	0	0	0	0	0	4	0	Archaea;Thaumarchaeota;Nitrososphaeria;Nitrosopumilales;Nitrosopumilaceae;uncultured_archaeon	FJ571965.1.1346	100	0
UNI842	3	1	11	6	2	1	20	8	0	0	0	1	0	0	0	7	15	0	Archaea;Thaumarchaeota;Nitrososphaeria;Nitrosopumilales;Nitrosopumilaceae;uncultured_archaeon	FJ571848.1.1346	99.282	0
UNI2601	1	0	3	0	0	0	0	1	15	0	0	0	0	0	0	0	0	2	Archaea;Thaumarchaeota;Nitrososphaeria;Nitrosopumilales;Nitrosopumilaceae;uncultured_archaeon	KM454190.1.916	99.522	0
UNI2322	3	3	0	0	21	0	0	0	0	0	0	0	0	0	0	0	0	0	Archaea;Thaumarchaeota;Nitrososphaeria;Nitrosopumilales;Nitrosopumilaceae;uncultured_archaeon	FJ571892.1.1345	99.282	0
UNI60	10	26	63	1	11	1	96	57	0	0	0	26	9	0	0	102	121	0	Archaea;Thaumarchaeota;Nitrososphaeria;Nitrosopumilales;Nitrosopumilaceae;uncultured_archaeon	LC080910.1.1441	99.522	0
UNI733	2	6	6	0	1	0	13	27	35	0	1	4	0	0	0	9	11	6	Archaea;Thaumarchaeota;Nitrososphaeria;Nitrosopumilales;Nitrosopumilaceae;uncultured_archaeon	LC080931.1.1441	99.043	0
UNI729	7	24	5	6	3	1	0	2	0	0	0	4	3	0	0	0	2	0	Archaea;Thaumarchaeota;Nitrososphaeria;Nitrosopumilales;Nitrosopumilaceae;uncultured_archaeon	FJ571848.1.1346	99.043	0
UNI1218	3	22	7	20	2	0	1	2	0	0	0	5	3	0	0	1	5	0	Archaea;Thaumarchaeota;Nitrososphaeria;Nitrosopumilales;Nitrosopumilaceae;uncultured_archaeon	FJ571848.1.1346	99.522	0
UNI2841	1	2	3	5	0	0	0	0	0	0	2	0	1	0	0	0	0	0	Archaea;Thaumarchaeota;Nitrososphaeria;Nitrosopumilales;Nitrosopumilaceae;uncultured_archaeon	FJ571829.1.1346	99.761	0
UNI2343	3	7	1	4	0	0	0	0	0	0	0	0	2	0	0	0	0	0	Archaea;Thaumarchaeota;Nitrososphaeria;Nitrosopumilales;Nitrosopumilaceae;uncultured_archaeon	FJ571829.1.1346	99.522	0
UNI1443	1	1	10	6	0	0	0	0	0	0	0	15	8	0	0	0	0	0	Archaea;Thaumarchaeota;Nitrososphaeria;Nitrosopumilales;Nitrosopumilaceae;uncultured_archaeon	FJ571829.1.1346	99.282	0
UNI1088	1	0	14	8	7	3	1	0	0	0	0	2	5	0	0	2	0	0	Archaea;Thaumarchaeota;Nitrososphaeria;Nitrosopumilales;Nitrosopumilaceae;uncultured_archaeon	FJ571863.1.1345	99.522	0
UNI1292	2	10	0	25	1	6	0	2	0	0	0	0	10	0	0	0	4	0	Archaea;Thaumarchaeota;Nitrososphaeria;Nitrosopumilales;Nitrosopumilaceae;uncultured_archaeon	FJ571957.1.1345	99.282	0
UNI2196	1	1	9	0	0	0	2	6	0	0	0	0	0	0	0	2	1	0	Archaea;Thaumarchaeota;Nitrososphaeria;Nitrosopumilales;Nitrosopumilaceae;uncultured_archaeon	FJ571712.1.1345	99.761	0
UNI2260	4	6	3	6	2	5	0	0	0	0	0	0	1	0	0	1	6	0	Archaea;Thaumarchaeota;Nitrososphaeria;Nitrosopumilales;Nitrosopumilaceae;uncultured_archaeon	FJ571832.1.1345	99.282	0
UNI2826	1	14	3	5	1	0	0	1	0	0	0	1	1	0	0	0	0	0	Archaea;Thaumarchaeota;Nitrososphaeria;Nitrosopumilales;Nitrosopumilaceae;uncultured_archaeon	FJ571848.1.1346	99.043	0
UNI260	3	3	13	0	4	0	27	15	44	0	1	1	0	0	0	12	25	14	Archaea;Thaumarchaeota;Nitrososphaeria;Nitrosopumilales;Nitrosopumilaceae;uncultured_archaeon	LC080931.1.1441	99.282	0
UNI1809	1	6	1	0	20	5	3	0	2	0	0	4	0	0	0	1	3	1	Archaea;Thaumarchaeota;Nitrososphaeria;Nitrosopumilales;Nitrosopumilaceae;uncultured_archaeon	AB629515.1.913	100	0
UNI2139	1	12	0	0	5	7	0	0	0	0	0	0	0	0	0	0	0	0	Archaea;Thaumarchaeota;Nitrososphaeria;Nitrosopumilales;Nitrosopumilaceae;uncultured_archaeon	FJ571874.1.1346	99.761	0
UNI3104	5	15	0	1	5	0	0	0	0	0	0	0	0	0	0	0	0	0	Archaea;Thaumarchaeota;Nitrososphaeria;Nitrosopumilales;Nitrosopumilaceae;uncultured_archaeon	FJ571860.1.1345	99.043	0
UNI636	1	4	14	0	2	0	23	16	0	0	0	2	0	0	0	7	9	0	Archaea;Thaumarchaeota;Nitrososphaeria;Nitrosopumilales;Nitrosopumilaceae;uncultured_archaeon	LC080910.1.1441	99.761	0
UNI3226	1	12	4	0	0	0	0	0	0	0	0	0	0	0	0	0	0	0	Archaea;Thaumarchaeota;Nitrososphaeria;Nitrosopumilales;Nitrosopumilaceae;uncultured_archaeon	JX000671.1.1402	99.282	0
UNI1839	3	14	6	4	0	0	0	1	0	0	0	2	0	0	0	0	0	0	Archaea;Thaumarchaeota;Nitrososphaeria;Nitrosopumilales;Nitrosopumilaceae;uncultured_archaeon	FJ571874.1.1346	99.761	0
UNI2739	1	10	0	0	27	2	0	0	0	0	0	0	0	0	0	0	0	0	Archaea;Thaumarchaeota;Nitrososphaeria;Nitrosopumilales;Nitrosopumilaceae;uncultured_archaeon	AY627453.1.1126	98.804	0
UNI2911	3	4	1	1	5	2	1	0	0	0	0	3	1	0	0	0	0	0	Archaea;Thaumarchaeota;Nitrososphaeria;Nitrosopumilales;Nitrosopumilaceae;uncultured_archaeon	FJ571855.1.1345	99.282	0
UNI1296	5	7	3	1	0	3	8	3	0	0	0	0	0	0	0	2	3	0	Archaea;Thaumarchaeota;Nitrososphaeria;Nitrosopumilales;Nitrosopumilaceae;uncultured_archaeon	FJ571965.1.1346	99.761	0
UNI2075	2	0	2	0	3	16	0	1	0	0	0	0	0	0	0	0	0	0	Archaea;Thaumarchaeota;Nitrososphaeria;Nitrosopumilales;Nitrosopumilaceae;uncultured_archaeon	FJ571929.1.1346	99.522	0
UNI2857	2	7	0	0	0	2	4	0	0	0	0	2	0	0	0	0	0	0	Archaea;Thaumarchaeota;Nitrososphaeria;Nitrosopumilales;Nitrosopumilaceae;uncultured_archaeon	FJ571965.1.1346	99.522	0
UNI1805	1	1	2	1	14	16	0	1	0	0	0	1	0	0	0	0	0	0	Archaea;Thaumarchaeota;Nitrososphaeria;Nitrosopumilales;Nitrosopumilaceae;uncultured_archaeon	AY627432.1.1147	100	0
UNI934	1	21	4	0	10	7	2	4	11	0	0	3	0	0	0	0	1	2	Archaea;Thaumarchaeota;Nitrososphaeria;Nitrosopumilales;Nitrosopumilaceae;uncultured_archaeon	FJ571712.1.1345	99.282	0
UNI1991	1	7	2	1	15	4	2	2	2	0	0	1	0	0	0	0	1	0	Archaea;Thaumarchaeota;Nitrososphaeria;Nitrosopumilales;Nitrosopumilaceae;uncultured_archaeon	AB629515.1.913	99.761	0
UNI2530	1	4	8	7	0	0	0	0	0	0	0	6	3	0	0	0	0	0	Archaea;Thaumarchaeota;Nitrososphaeria;Nitrosopumilales;Nitrosopumilaceae;uncultured_archaeon	FJ571848.1.1346	99.282	0
UNI2109	3	0	13	0	0	0	0	9	0	0	0	5	0	0	0	0	6	0	Archaea;Thaumarchaeota;Nitrososphaeria;Nitrosopumilales;Nitrosopumilaceae;uncultured_archaeon	FJ571712.1.1345	99.282	0
UNI124	1	3	17	0	7	3	46	41	68	0	0	8	0	0	0	40	54	33	Archaea;Thaumarchaeota;Nitrososphaeria;Nitrosopumilales;Nitrosopumilaceae;uncultured_archaeon	LC080931.1.1441	99.043	0
UNI1351	1	9	2	1	20	9	1	1	6	0	0	5	0	0	0	2	1	2	Archaea;Thaumarchaeota;Nitrososphaeria;Nitrosopumilales;Nitrosopumilaceae;uncultured_archaeon	AB629515.1.913	99.761	0
UNI905	1	21	11	2	1	0	21	7	0	0	0	8	0	0	0	7	10	0	Archaea;Thaumarchaeota;Nitrososphaeria;Nitrosopumilales;Nitrosopumilaceae;uncultured_archaeon	LC139766.1.900	99.52	0
UNI2798	1	0	2	3	1	0	4	4	0	0	0	0	0	0	0	2	3	0	Archaea;Thaumarchaeota;Nitrososphaeria;Nitrosopumilales;Nitrosopumilaceae;uncultured_archaeon	FJ571848.1.1346	99.043	0
UNI116	1	3	24	0	3	3	49	54	82	0	0	5	0	0	0	24	53	24	Archaea;Thaumarchaeota;Nitrososphaeria;Nitrosopumilales;Nitrosopumilaceae;uncultured_archaeon	LC080931.1.1441	99.282	0
UNI2177	1	3	5	3	11	0	3	4	0	0	0	0	3	0	0	0	2	0	Archaea;Thaumarchaeota;Nitrososphaeria;Nitrosopumilales;Nitrosopumilaceae;uncultured_archaeon	AB629515.1.913	99.282	0
UNI2333	2	2	7	2	0	0	1	0	0	0	0	4	2	0	0	0	0	0	Archaea;Thaumarchaeota;Nitrososphaeria;Nitrosopumilales;Nitrosopumilaceae;uncultured_archaeon	FJ571829.1.1346	99.043	0
UNI487	1	0	32	16	21	7	1	0	0	0	0	6	22	0	0	5	0	0	Archaea;Thaumarchaeota;Nitrososphaeria;Nitrosopumilales;Nitrosopumilaceae;uncultured_archaeon	FJ571863.1.1345	99.761	0
UNI3289	2	1	0	0	23	1	0	0	0	0	0	0	0	0	0	0	0	0	Archaea;Thaumarchaeota;Nitrososphaeria;Nitrosopumilales;Nitrosopumilaceae;uncultured_archaeon	AY627453.1.1126	99.282	0
UNI1418	1	6	6	0	0	1	9	5	0	0	0	0	0	0	0	7	5	0	Archaea;Thaumarchaeota;Nitrososphaeria;Nitrosopumilales;Nitrosopumilaceae;uncultured_archaeon	FJ571965.1.1346	99.522	0
UNI1044	1	0	1	45	0	0	0	0	0	0	0	0	5	0	0	0	0	0	Archaea;Thaumarchaeota;Nitrososphaeria;Nitrosopumilales;Nitrosopumilaceae;uncultured_archaeon	LC081092.1.1441	98.807	0
UNI1989	1	1	2	22	0	0	0	0	0	0	0	0	5	0	0	0	0	0	Archaea;Thaumarchaeota;Nitrososphaeria;Nitrosopumilales;Nitrosopumilaceae;uncultured_archaeon	FJ571957.1.1345	99.761	0
UNI634	1	20	10	0	0	1	12	5	0	0	0	0	0	0	0	15	12	0	Archaea;Thaumarchaeota;Nitrososphaeria;Nitrosopumilales;Nitrosopumilaceae;uncultured_archaeon	FJ571965.1.1346	99.522	0
UNI2257	0	1	0	0	0	0	10	7	0	0	0	0	0	0	0	2	4	0	Archaea;Thaumarchaeota;Nitrososphaeria;Nitrosopumilales;Nitrosopumilaceae;uncultured_archaeon	LC080931.1.1441	99.522	0
UNI982	0	4	0	0	0	0	10	12	1	0	0	0	0	0	0	4	17	0	Archaea;Thaumarchaeota;Nitrososphaeria;Nitrosopumilales;Nitrosopumilaceae;uncultured_archaeon	LC080931.1.1441	99.282	0
UNI3372	0	3	0	0	9	0	0	0	0	0	0	0	0	0	0	0	0	0	Archaea;Thaumarchaeota;Nitrososphaeria;Nitrosopumilales;Nitrosopumilaceae;uncultured_archaeon	AY627453.1.1126	98.804	0
UNI1372	0	15	4	0	11	1	0	1	0	0	0	0	0	0	0	0	0	0	Archaea;Thaumarchaeota;Nitrososphaeria;Nitrosopumilales;Nitrosopumilaceae;uncultured_archaeon	FJ571965.1.1346	99.761	0
UNI1983	0	42	0	0	0	0	4	4	0	0	0	0	0	0	0	2	6	0	Archaea;Thaumarchaeota;Nitrososphaeria;Nitrosopumilales;Nitrosopumilaceae;uncultured_archaeon	AB606801.1.900	98.321	0
UNI223	0	3	28	0	0	0	36	31	52	0	0	5	2	0	0	17	29	17	Archaea;Thaumarchaeota;Nitrososphaeria;Nitrosopumilales;Nitrosopumilaceae;uncultured_archaeon	LC080931.1.1441	99.522	0
UNI1816	0	7	0	0	27	1	0	0	0	0	0	0	0	0	0	0	0	0	Archaea;Thaumarchaeota;Nitrososphaeria;Nitrosopumilales;Nitrosopumilaceae;uncultured_archaeon	AY627453.1.1126	99.043	0
UNI801	0	11	0	0	0	11	8	21	0	0	0	0	0	0	0	1	14	0	Archaea;Thaumarchaeota;Nitrososphaeria;Nitrosopumilales;Nitrosopumilaceae;uncultured_archaeon	FJ571920.1.1346	99.522	0
UNI1753	0	5	0	0	0	4	3	13	1	0	0	0	0	0	0	0	9	0	Archaea;Thaumarchaeota;Nitrososphaeria;Nitrosopumilales;Nitrosopumilaceae;uncultured_archaeon	FJ571920.1.1346	99.761	0
UNI1959	0	21	0	0	0	0	0	0	0	0	0	0	0	0	0	0	0	0	Archaea;Thaumarchaeota;Nitrososphaeria;Nitrosopumilales;Nitrosopumilaceae;uncultured_archaeon	AY627452.1.1194	98.325	0
UNI2804	0	27	0	0	0	0	1	3	0	0	0	0	0	0	0	1	2	0	Archaea;Thaumarchaeota;Nitrososphaeria;Nitrosopumilales;Nitrosopumilaceae;uncultured_archaeon	AY627452.1.1194	98.086	0
UNI2490	0	1	6	16	0	0	1	5	0	0	0	0	3	0	0	0	2	0	Archaea;Thaumarchaeota;Nitrososphaeria;Nitrosopumilales;Nitrosopumilaceae;uncultured_archaeon	FJ571848.1.1346	99.043	0
UNI2674	0	7	3	0	0	1	3	3	0	0	0	0	0	0	0	4	4	0	Archaea;Thaumarchaeota;Nitrososphaeria;Nitrosopumilales;Nitrosopumilaceae;uncultured_archaeon	FJ571965.1.1346	99.282	0
UNI351	0	13	13	0	1	0	24	9	0	0	0	14	0	0	0	19	31	0	Archaea;Thaumarchaeota;Nitrososphaeria;Nitrosopumilales;Nitrosopumilaceae;uncultured_archaeon	LC139766.1.900	99.281	0
UNI3208	0	8	0	0	0	0	0	0	0	0	0	0	0	0	0	0	0	0	Archaea;Thaumarchaeota;Nitrososphaeria;Nitrosopumilales;Nitrosopumilaceae;uncultured_archaeon	AY627452.1.1194	98.565	0
UNI1392	0	4	9	0	5	1	2	4	0	0	0	6	1	0	0	0	3	0	Archaea;Thaumarchaeota;Nitrososphaeria;Nitrosopumilales;Nitrosopumilaceae;uncultured_archaeon	AB629515.1.913	99.282	0
UNI754	0	5	1	0	30	34	0	3	0	0	0	0	0	0	0	0	4	0	Archaea;Thaumarchaeota;Nitrososphaeria;Nitrosopumilales;Nitrosopumilaceae;uncultured_archaeon	FJ571673.1.1346	99.522	0
UNI2978	0	19	3	1	23	2	0	0	0	0	0	0	5	0	0	0	0	0	Archaea;Thaumarchaeota;Nitrososphaeria;Nitrosopumilales;Nitrosopumilaceae;uncultured_archaeon	AB629515.1.913	99.282	0
UNI404	0	1	3	84	0	0	2	0	0	0	0	0	15	0	0	4	0	0	Archaea;Thaumarchaeota;Nitrososphaeria;Nitrosopumilales;Nitrosopumilaceae;uncultured_archaeon	LC139939.1.900	99.281	0
UNI1335	0	8	7	1	5	5	0	5	6	0	0	2	0	0	0	4	1	0	Archaea;Thaumarchaeota;Nitrososphaeria;Nitrosopumilales;Nitrosopumilaceae;uncultured_archaeon	FJ571712.1.1345	99.522	0
UNI1370	0	5	17	3	1	8	0	7	4	0	0	1	0	0	0	0	2	2	Archaea;Thaumarchaeota;Nitrososphaeria;Nitrosopumilales;Nitrosopumilaceae;uncultured_archaeon	FJ571712.1.1345	99.761	0
UNI2182	0	2	2	0	5	12	0	0	0	0	0	1	0	0	0	0	1	0	Archaea;Thaumarchaeota;Nitrososphaeria;Nitrosopumilales;Nitrosopumilaceae;uncultured_archaeon	FJ571673.1.1346	99.761	0
UNI1647	0	5	5	15	0	0	1	0	0	0	0	0	9	0	0	0	0	0	Archaea;Thaumarchaeota;Nitrososphaeria;Nitrosopumilales;Nitrosopumilaceae;uncultured_archaeon	FJ571957.1.1345	99.522	0
UNI1293	0	3	0	0	22	18	0	3	0	0	0	0	0	0	0	0	1	0	Archaea;Thaumarchaeota;Nitrososphaeria;Nitrosopumilales;Nitrosopumilaceae;uncultured_archaeon	FJ571673.1.1346	99.522	0
UNI3400	0	1	0	5	0	0	0	0	0	0	0	0	2	0	0	0	0	0	Archaea;Thaumarchaeota;Nitrososphaeria;Nitrosopumilales;Nitrosopumilaceae;uncultured_archaeon	FJ571848.1.1346	98.804	0
UNI1017	0	4	10	24	1	0	0	3	0	0	0	1	12	0	0	0	0	0	Archaea;Thaumarchaeota;Nitrososphaeria;Nitrosopumilales;Nitrosopumilaceae;uncultured_archaeon	FJ571957.1.1345	99.282	0
UNI3027	0	3	5	2	8	0	1	1	0	0	0	2	1	0	0	0	0	0	Archaea;Thaumarchaeota;Nitrososphaeria;Nitrosopumilales;Nitrosopumilaceae;uncultured_archaeon	AB629515.1.913	99.522	0
UNI1001	0	3	12	0	2	0	13	20	16	0	0	4	0	0	0	1	7	5	Archaea;Thaumarchaeota;Nitrososphaeria;Nitrosopumilales;Nitrosopumilaceae;uncultured_archaeon	LC080931.1.1441	99.282	0
UNI2099	0	3	0	17	0	0	2	0	0	0	0	1	6	0	0	3	0	0	Archaea;Thaumarchaeota;Nitrososphaeria;Nitrosopumilales;Nitrosopumilaceae;uncultured_archaeon	FJ571960.1.1345	99.282	0
UNI1374	0	3	3	0	13	13	0	0	0	0	0	1	1	0	0	0	0	1	Archaea;Thaumarchaeota;Nitrososphaeria;Nitrosopumilales;Nitrosopumilaceae;uncultured_archaeon	FJ571673.1.1346	100	0
UNI586	0	2	1	1	26	42	0	0	0	0	0	1	0	0	0	0	2	0	Archaea;Thaumarchaeota;Nitrososphaeria;Nitrosopumilales;Nitrosopumilaceae;uncultured_archaeon	FJ571673.1.1346	99.761	0
UNI1759	0	2	5	29	0	0	0	0	0	0	0	0	5	0	0	0	0	0	Archaea;Thaumarchaeota;Nitrososphaeria;Nitrosopumilales;Nitrosopumilaceae;uncultured_archaeon	FJ571957.1.1345	99.522	0
UNI3334	0	1	0	1	4	9	0	1	0	0	0	0	0	0	0	0	0	0	Archaea;Thaumarchaeota;Nitrososphaeria;Nitrosopumilales;Nitrosopumilaceae;uncultured_archaeon	LC139788.1.900	99.76	0
UNI1362	0	2	1	0	19	28	0	0	0	0	0	0	0	0	0	0	0	0	Archaea;Thaumarchaeota;Nitrososphaeria;Nitrosopumilales;Nitrosopumilaceae;uncultured_archaeon	AY627432.1.1147	99.761	0
UNI204	0	2	40	3	0	0	58	45	0	0	0	20	2	0	0	27	38	0	Archaea;Thaumarchaeota;Nitrososphaeria;Nitrosopumilales;Nitrosopumilaceae;uncultured_archaeon	LC080910.1.1441	99.761	0
UNI2848	0	3	0	0	0	0	3	5	0	0	0	0	0	0	0	0	2	0	Archaea;Thaumarchaeota;Nitrososphaeria;Nitrosopumilales;Nitrosopumilaceae;uncultured_archaeon	LC080931.1.1441	99.282	0
UNI1083	0	1	17	0	0	0	3	13	0	0	0	1	0	0	0	4	9	0	Archaea;Thaumarchaeota;Nitrososphaeria;Nitrosopumilales;Nitrosopumilaceae;uncultured_archaeon	FJ571712.1.1345	99.522	0
UNI114	0	1	52	0	0	0	82	49	0	0	0	25	7	0	0	59	78	0	Archaea;Thaumarchaeota;Nitrososphaeria;Nitrosopumilales;Nitrosopumilaceae;uncultured_archaeon	LC080910.1.1441	99.761	0
UNI1145	0	1	0	0	0	0	11	10	0	0	0	0	0	0	0	1	7	0	Archaea;Thaumarchaeota;Nitrososphaeria;Nitrosopumilales;Nitrosopumilaceae;uncultured_archaeon	LC080931.1.1441	99.522	0
UNI2909	0	0	14	0	0	0	0	0	0	0	0	3	0	0	0	0	2	0	Archaea;Thaumarchaeota;Nitrososphaeria;Nitrosopumilales;Nitrosopumilaceae;uncultured_archaeon	FJ571712.1.1345	99.522	0
UNI287	0	0	48	5	0	0	6	19	0	0	0	18	4	2	0	1	36	0	Archaea;Thaumarchaeota;Nitrososphaeria;Nitrosopumilales;Nitrosopumilaceae;uncultured_archaeon	FJ571712.1.1345	99.043	0
UNI392	0	0	25	2	0	0	2	15	0	0	0	18	3	1	0	0	29	0	Archaea;Thaumarchaeota;Nitrososphaeria;Nitrosopumilales;Nitrosopumilaceae;uncultured_archaeon	JQ013326.1.914	99.282	0
UNI1716	0	0	8	0	0	0	4	3	0	0	0	10	0	0	0	5	3	0	Archaea;Thaumarchaeota;Nitrososphaeria;Nitrosopumilales;Nitrosopumilaceae;uncultured_archaeon	FJ571965.1.1346	99.043	0
UNI306	0	0	29	0	0	0	33	30	0	0	0	15	0	0	0	20	19	0	Archaea;Thaumarchaeota;Nitrososphaeria;Nitrosopumilales;Nitrosopumilaceae;uncultured_archaeon	LC080910.1.1441	99.522	0
UNI241	0	0	38	35	16	8	4	0	0	0	0	19	29	0	0	4	0	0	Archaea;Thaumarchaeota;Nitrososphaeria;Nitrosopumilales;Nitrosopumilaceae;uncultured_archaeon	FJ571863.1.1345	99.522	0
UNI1175	0	0	14	0	0	0	5	3	1	0	0	12	2	0	0	5	4	0	Archaea;Thaumarchaeota;Nitrososphaeria;Nitrosopumilales;Nitrosopumilaceae;uncultured_archaeon	FJ571965.1.1346	98.804	0
UNI1024	0	0	14	4	0	0	11	7	0	0	0	2	0	0	0	9	19	0	Archaea;Thaumarchaeota;Nitrososphaeria;Nitrosopumilales;Nitrosopumilaceae;uncultured_archaeon	FJ571848.1.1346	99.282	0
UNI498	0	0	18	16	9	3	1	0	0	0	0	8	14	0	0	4	0	0	Archaea;Thaumarchaeota;Nitrososphaeria;Nitrosopumilales;Nitrosopumilaceae;uncultured_archaeon	FJ571863.1.1345	100	0
UNI1938	0	0	3	0	3	16	0	2	3	0	0	0	0	0	0	0	0	0	Archaea;Thaumarchaeota;Nitrososphaeria;Nitrosopumilales;Nitrosopumilaceae;uncultured_archaeon	FJ571929.1.1346	99.282	0
UNI219	0	0	30	0	0	0	45	29	0	0	0	17	1	0	0	26	26	0	Archaea;Thaumarchaeota;Nitrososphaeria;Nitrosopumilales;Nitrosopumilaceae;uncultured_archaeon	LC080910.1.1441	100	0
UNI3110	0	0	12	0	1	0	1	2	0	0	0	3	0	0	0	0	1	0	Archaea;Thaumarchaeota;Nitrososphaeria;Nitrosopumilales;Nitrosopumilaceae;uncultured_archaeon	AB629515.1.913	99.522	0
UNI98	0	0	2	0	0	0	2	3	233	0	1	0	0	0	0	0	0	119	Archaea;Thaumarchaeota;Nitrososphaeria;Nitrosopumilales;Nitrosopumilaceae;uncultured_archaeon	JF268338.1.1346	99.761	0
UNI1201	0	0	14	0	0	0	2	2	1	0	0	12	0	0	0	5	4	0	Archaea;Thaumarchaeota;Nitrososphaeria;Nitrosopumilales;Nitrosopumilaceae;uncultured_archaeon	FJ571965.1.1346	99.043	0
UNI3040	0	0	2	8	0	0	0	3	0	0	0	0	10	0	0	0	3	0	Archaea;Thaumarchaeota;Nitrososphaeria;Nitrosopumilales;Nitrosopumilaceae;uncultured_archaeon	FJ571848.1.1346	99.043	0
UNI2030	0	0	5	9	0	0	0	0	0	0	0	7	2	0	0	0	0	0	Archaea;Thaumarchaeota;Nitrososphaeria;Nitrosopumilales;Nitrosopumilaceae;uncultured_archaeon	FJ571829.1.1346	99.282	0
UNI2676	0	0	1	0	2	13	0	0	0	0	0	0	0	0	0	0	0	1	Archaea;Thaumarchaeota;Nitrososphaeria;Nitrosopumilales;Nitrosopumilaceae;uncultured_archaeon	FJ571929.1.1346	99.282	0
UNI276	0	0	3	0	0	0	1	1	141	0	0	0	0	0	0	0	0	37	Archaea;Thaumarchaeota;Nitrososphaeria;Nitrosopumilales;Nitrosopumilaceae;uncultured_archaeon	JF268338.1.1346	100	0
UNI2123	0	0	4	4	0	0	4	8	0	0	0	0	0	0	0	6	5	0	Archaea;Thaumarchaeota;Nitrososphaeria;Nitrosopumilales;Nitrosopumilaceae;uncultured_archaeon	FJ571848.1.1346	99.522	0
UNI2415	0	0	2	26	0	0	0	0	0	0	0	0	0	0	0	0	0	0	Archaea;Thaumarchaeota;Nitrososphaeria;Nitrosopumilales;Nitrosopumilaceae;uncultured_archaeon	FJ571960.1.1345	99.522	0
UNI1794	0	0	2	49	0	0	0	0	0	0	0	0	14	0	0	0	0	0	Archaea;Thaumarchaeota;Nitrososphaeria;Nitrosopumilales;Nitrosopumilaceae;uncultured_archaeon	LC081092.1.1441	99.523	0
UNI2760	0	0	1	0	10	6	0	0	0	0	0	0	0	0	0	0	0	0	Archaea;Thaumarchaeota;Nitrososphaeria;Nitrosopumilales;Nitrosopumilaceae;uncultured_archaeon	HM998412.1.913	99.282	0
UNI1848	0	0	9	1	0	0	2	2	0	0	0	5	1	0	0	10	5	0	Archaea;Thaumarchaeota;Nitrososphaeria;Nitrosopumilales;Nitrosopumilaceae;uncultured_archaeon	AB629515.1.913	99.282	0
UNI2566	0	0	1	0	0	0	0	1	37	0	1	0	0	0	0	0	0	9	Archaea;Thaumarchaeota;Nitrososphaeria;Nitrosopumilales;Nitrosopumilaceae;uncultured_archaeon	JX000791.1.1049	99.522	0
UNI210	0	0	1	0	0	0	0	4	154	0	0	0	1	0	0	0	0	60	Archaea;Thaumarchaeota;Nitrososphaeria;Nitrosopumilales;Nitrosopumilaceae;uncultured_archaeon	JF268338.1.1346	99.761	0
UNI2344	0	0	1	17	0	0	0	0	0	0	0	0	1	0	0	0	0	0	Archaea;Thaumarchaeota;Nitrososphaeria;Nitrosopumilales;Nitrosopumilaceae;uncultured_archaeon	FJ571960.1.1345	99.282	0
UNI1243	0	0	0	44	0	0	0	0	0	0	0	0	11	0	0	0	0	0	Archaea;Thaumarchaeota;Nitrososphaeria;Nitrosopumilales;Nitrosopumilaceae;uncultured_archaeon	LC081092.1.1441	98.568	0
UNI1139	0	0	0	29	0	0	1	0	0	0	0	0	11	0	0	0	0	0	Archaea;Thaumarchaeota;Nitrososphaeria;Nitrosopumilales;Nitrosopumilaceae;uncultured_archaeon	LC139897.1.900	98.801	0
UNI1283	0	0	0	24	0	0	0	1	0	0	0	0	11	0	0	0	0	0	Archaea;Thaumarchaeota;Nitrososphaeria;Nitrosopumilales;Nitrosopumilaceae;uncultured_archaeon	LC081092.1.1441	98.807	0
UNI1783	0	0	0	26	0	0	0	0	0	0	0	0	4	0	0	0	0	0	Archaea;Thaumarchaeota;Nitrososphaeria;Nitrosopumilales;Nitrosopumilaceae;uncultured_archaeon	JQ815988.1.1401	99.043	0
UNI1082	0	0	0	21	0	0	0	0	0	0	0	0	20	0	0	0	0	0	Archaea;Thaumarchaeota;Nitrososphaeria;Nitrosopumilales;Nitrosopumilaceae;uncultured_archaeon	LC139897.1.900	98.561	0
UNI1070	0	0	0	45	0	0	0	0	0	0	0	0	9	0	0	0	0	0	Archaea;Thaumarchaeota;Nitrososphaeria;Nitrosopumilales;Nitrosopumilaceae;uncultured_archaeon	LC081092.1.1441	99.045	0
UNI1500	0	0	0	1	0	0	15	4	0	0	0	0	0	0	0	11	4	0	Archaea;Thaumarchaeota;Nitrososphaeria;Nitrosopumilales;Nitrosopumilaceae;uncultured_archaeon	LC139820.1.900	99.041	0
UNI2599	0	0	0	17	0	0	0	0	0	0	0	0	0	0	0	0	0	0	Archaea;Thaumarchaeota;Nitrososphaeria;Nitrosopumilales;Nitrosopumilaceae;uncultured_archaeon	JQ815988.1.1401	99.522	0
UNI2098	0	0	0	15	0	0	0	0	0	0	0	0	7	0	0	0	0	0	Archaea;Thaumarchaeota;Nitrososphaeria;Nitrosopumilales;Nitrosopumilaceae;uncultured_archaeon	JQ815988.1.1401	99.282	0
UNI2648	0	0	0	17	0	0	0	0	0	0	0	0	2	0	0	0	0	0	Archaea;Thaumarchaeota;Nitrososphaeria;Nitrosopumilales;Nitrosopumilaceae;uncultured_archaeon	JQ815988.1.1401	99.282	0
UNI3459	0	0	0	3	0	0	0	0	0	0	0	0	8	0	0	0	0	0	Archaea;Thaumarchaeota;Nitrososphaeria;Nitrosopumilales;Nitrosopumilaceae;uncultured_archaeon	LC139939.1.900	98.801	0
UNI1889	0	0	0	0	17	13	0	0	3	0	0	0	0	0	0	0	0	0	Archaea;Thaumarchaeota;Nitrososphaeria;Nitrosopumilales;Nitrosopumilaceae;uncultured_archaeon	HM998412.1.913	99.043	0
UNI2718	0	0	0	0	35	0	0	0	0	0	0	0	0	0	0	0	0	0	Archaea;Thaumarchaeota;Nitrososphaeria;Nitrosopumilales;Nitrosopumilaceae;uncultured_archaeon	KM454197.1.913	99.522	0
UNI3389	0	0	0	0	18	0	0	0	0	0	0	0	0	0	0	0	0	0	Archaea;Thaumarchaeota;Nitrososphaeria;Nitrosopumilales;Nitrosopumilaceae;uncultured_archaeon	LC139939.1.900	99.52	0
UNI3010	0	0	0	0	4	13	0	0	0	0	0	0	0	0	0	0	0	0	Archaea;Thaumarchaeota;Nitrososphaeria;Nitrosopumilales;Nitrosopumilaceae;uncultured_archaeon	AJ579320.1.915	99.282	0
UNI2677	0	0	0	0	5	13	0	0	0	0	0	0	0	0	0	0	0	0	Archaea;Thaumarchaeota;Nitrososphaeria;Nitrosopumilales;Nitrosopumilaceae;uncultured_archaeon	LC139898.1.900	99.52	0
UNI2183	0	0	0	0	6	14	0	0	0	0	0	0	0	0	0	0	0	0	Archaea;Thaumarchaeota;Nitrososphaeria;Nitrosopumilales;Nitrosopumilaceae;uncultured_archaeon	AJ579320.1.915	99.043	0
UNI2189	0	0	0	0	10	8	0	1	0	0	0	0	0	0	0	0	0	0	Archaea;Thaumarchaeota;Nitrososphaeria;Nitrosopumilales;Nitrosopumilaceae;uncultured_archaeon	HM998412.1.913	99.522	0
UNI2918	0	0	0	0	34	4	0	0	0	0	0	0	0	0	0	0	0	0	Archaea;Thaumarchaeota;Nitrososphaeria;Nitrosopumilales;Nitrosopumilaceae;uncultured_archaeon	LC139897.1.900	99.281	0
UNI1327	0	0	0	0	13	26	0	0	0	0	0	0	0	0	0	0	0	0	Archaea;Thaumarchaeota;Nitrososphaeria;Nitrosopumilales;Nitrosopumilaceae;uncultured_archaeon	AJ579320.1.915	99.043	0
UNI2545	0	0	0	0	9	13	0	0	2	0	0	0	0	0	0	0	0	0	Archaea;Thaumarchaeota;Nitrososphaeria;Nitrosopumilales;Nitrosopumilaceae;uncultured_archaeon	HM998412.1.913	99.282	0
UNI1645	0	0	0	0	7	24	0	0	0	0	0	0	0	0	0	0	0	0	Archaea;Thaumarchaeota;Nitrososphaeria;Nitrosopumilales;Nitrosopumilaceae;uncultured_archaeon	AJ579320.1.915	99.282	0
UNI2950	0	0	0	0	5	6	0	0	0	0	0	0	0	0	0	0	0	0	Archaea;Thaumarchaeota;Nitrososphaeria;Nitrosopumilales;Nitrosopumilaceae;uncultured_archaeon	AJ579320.1.915	99.282	0
UNI1412	0	0	0	0	3	21	0	0	0	0	0	0	0	0	0	0	0	0	Archaea;Thaumarchaeota;Nitrososphaeria;Nitrosopumilales;Nitrosopumilaceae;uncultured_archaeon	AJ579320.1.915	99.522	0
UNI2961	0	0	0	0	0	0	12	4	0	0	0	0	0	0	0	26	5	0	Archaea;Thaumarchaeota;Nitrososphaeria;Nitrosopumilales;Nitrosopumilaceae;uncultured_archaeon	LC139897.1.900	99.041	0
UNI704	0	0	0	0	0	0	1	2	66	0	0	0	0	0	0	0	0	14	Archaea;Thaumarchaeota;Nitrososphaeria;Nitrosopumilales;Nitrosopumilaceae;uncultured_archaeon	JF268338.1.1346	99.761	0
UNI3456	0	0	0	0	0	0	8	3	0	0	0	0	0	0	0	9	1	0	Archaea;Thaumarchaeota;Nitrososphaeria;Nitrosopumilales;Nitrosopumilaceae;uncultured_archaeon	GQ994288.1.939	99.043	0
UNI289	0	0	0	0	0	0	1	2	119	0	1	0	0	0	0	0	0	34	Archaea;Thaumarchaeota;Nitrososphaeria;Nitrosopumilales;Nitrosopumilaceae;uncultured_archaeon	JF268338.1.1346	99.522	0
UNI93	0	0	0	0	0	0	2	3	246	0	0	0	0	0	0	0	2	143	Archaea;Thaumarchaeota;Nitrososphaeria;Nitrosopumilales;Nitrosopumilaceae;uncultured_archaeon	JF268338.1.1346	99.522	0
UNI2513	0	0	0	0	0	0	0	0	22	0	0	0	0	0	0	0	0	8	Archaea;Thaumarchaeota;Nitrososphaeria;Nitrosopumilales;Nitrosopumilaceae;uncultured_archaeon	KM454190.1.916	99.282	0
UNI1650	0	0	0	0	0	0	0	0	25	0	0	0	0	0	0	0	0	17	Archaea;Thaumarchaeota;Nitrososphaeria;Nitrosopumilales;Nitrosopumilaceae;uncultured_archaeon	KM454190.1.916	99.522	0
UNI2819	0	0	0	0	0	0	0	0	78	0	0	0	1	0	0	0	0	46	Archaea;Thaumarchaeota;Nitrososphaeria;Nitrosopumilales;Nitrosopumilaceae;uncultured_archaeon	GU270167.1.914	99.282	0
UNI3001	6	9	3	0	0	0	0	2	0	0	0	0	0	0	0	0	1	0	Archaea;Thaumarchaeota;Nitrososphaeria;Nitrosopumilales;Nitrosopumilaceae;uncultured_archaeon_APA3-0cm	AF119136.1.1339	99.043	0
UNI1140	2	4	1	1	0	0	1	10	0	0	0	0	0	0	0	0	34	0	Archaea;Thaumarchaeota;Nitrososphaeria;Nitrosopumilales;Nitrosopumilaceae;uncultured_archaeon_APA3-0cm	AF119136.1.1339	99.522	0
UNI968	0	0	3	0	0	0	3	12	0	0	0	1	0	0	0	0	33	0	Archaea;Thaumarchaeota;Nitrososphaeria;Nitrosopumilales;Nitrosopumilaceae;uncultured_archaeon_APA3-0cm	AF119136.1.1339	99.282	0
UNI873	4	12	0	0	6	34	0	2	0	0	0	0	0	0	0	0	0	0	Archaea;Thaumarchaeota;Nitrososphaeria;Nitrosopumilales;Nitrosopumilaceae;uncultured_archaeon_CRA7-0cm	AF119125.1.1042	99.761	0
UNI169	10	3	13	0	2	3	47	46	0	0	0	6	0	0	0	32	50	0	Archaea;Thaumarchaeota;Nitrososphaeria;Nitrosopumilales;Nitrosopumilaceae;uncultured_archaeon_CRA7-0cm	AF119125.1.1042	99.043	0
UNI855	6	9	0	0	2	36	0	4	0	0	0	0	0	0	0	0	0	1	Archaea;Thaumarchaeota;Nitrososphaeria;Nitrosopumilales;Nitrosopumilaceae;uncultured_archaeon_CRA7-0cm	AF119125.1.1042	99.522	0
UNI553	2	1	3	0	0	1	24	25	0	0	0	1	0	0	0	10	19	0	Archaea;Thaumarchaeota;Nitrososphaeria;Nitrosopumilales;Nitrosopumilaceae;uncultured_archaeon_CRA7-0cm	AF119125.1.1042	99.282	0
UNI1043	1	0	6	0	0	0	13	8	0	0	0	5	0	0	0	4	17	0	Archaea;Thaumarchaeota;Nitrososphaeria;Nitrosopumilales;Nitrosopumilaceae;uncultured_archaeon_CRA7-0cm	AF119125.1.1042	99.522	0
UNI1195	4	8	0	0	0	16	1	0	1	0	0	0	0	0	0	0	0	0	Archaea;Thaumarchaeota;Nitrososphaeria;Nitrosopumilales;Nitrosopumilaceae;uncultured_archaeon_CRA7-0cm	AF119125.1.1042	100	0
UNI249	1	0	14	0	0	1	44	31	0	0	0	9	0	0	0	22	39	0	Archaea;Thaumarchaeota;Nitrososphaeria;Nitrosopumilales;Nitrosopumilaceae;uncultured_archaeon_CRA7-0cm	AF119125.1.1042	99.282	0
UNI2983	2	1	0	0	1	14	0	0	0	0	0	0	0	0	0	0	1	0	Archaea;Thaumarchaeota;Nitrososphaeria;Nitrosopumilales;Nitrosopumilaceae;uncultured_archaeon_CRA7-0cm	AF119125.1.1042	99.761	0
UNI3295	2	3	1	0	0	9	0	1	0	0	0	1	0	0	0	0	2	0	Archaea;Thaumarchaeota;Nitrososphaeria;Nitrosopumilales;Nitrosopumilaceae;uncultured_archaeon_CRA7-0cm	AF119125.1.1042	99.761	0
UNI2793	3	7	0	0	0	10	0	0	0	0	0	0	0	0	0	0	0	0	Archaea;Thaumarchaeota;Nitrososphaeria;Nitrosopumilales;Nitrosopumilaceae;uncultured_archaeon_CRA7-0cm	AF119125.1.1042	99.522	0
UNI2159	6	8	6	0	0	3	1	5	0	0	0	2	0	0	0	0	3	0	Archaea;Thaumarchaeota;Nitrososphaeria;Nitrosopumilales;Nitrosopumilaceae;uncultured_archaeon_CRA7-0cm	AF119125.1.1042	99.522	0
UNI1734	1	0	2	0	0	13	4	10	1	0	0	0	0	0	0	1	9	0	Archaea;Thaumarchaeota;Nitrososphaeria;Nitrosopumilales;Nitrosopumilaceae;uncultured_archaeon_CRA7-0cm	AF119125.1.1042	99.522	0
UNI2181	5	3	1	0	2	5	0	1	0	0	0	1	0	0	0	0	0	0	Archaea;Thaumarchaeota;Nitrososphaeria;Nitrosopumilales;Nitrosopumilaceae;uncultured_archaeon_CRA7-0cm	AF119125.1.1042	99.522	0
UNI2827	1	4	2	0	0	15	0	0	0	0	0	1	0	0	0	0	2	0	Archaea;Thaumarchaeota;Nitrososphaeria;Nitrosopumilales;Nitrosopumilaceae;uncultured_archaeon_CRA7-0cm	AF119125.1.1042	99.522	0
UNI1654	2	5	0	0	2	25	0	1	0	0	0	0	0	0	0	0	0	0	Archaea;Thaumarchaeota;Nitrososphaeria;Nitrosopumilales;Nitrosopumilaceae;uncultured_archaeon_CRA7-0cm	AF119125.1.1042	99.761	0
UNI1569	1	3	4	0	5	1	11	10	0	0	0	0	0	0	0	0	5	0	Archaea;Thaumarchaeota;Nitrososphaeria;Nitrosopumilales;Nitrosopumilaceae;uncultured_archaeon_CRA7-0cm	AF119125.1.1042	99.282	0
UNI1976	1	12	1	0	0	20	3	2	0	0	0	1	0	0	0	1	3	0	Archaea;Thaumarchaeota;Nitrososphaeria;Nitrosopumilales;Nitrosopumilaceae;uncultured_archaeon_CRA7-0cm	AF119125.1.1042	99.282	0
UNI1158	1	5	30	5	0	0	0	4	0	0	0	10	5	0	0	0	0	0	Archaea;Thaumarchaeota;Nitrososphaeria;Nitrosopumilales;Nitrosopumilaceae;uncultured_archaeon_CRA7-0cm	AF119125.1.1042	99.522	0
UNI432	2	14	44	6	0	4	2	1	0	0	0	29	8	0	0	0	12	0	Archaea;Thaumarchaeota;Nitrososphaeria;Nitrosopumilales;Nitrosopumilaceae;uncultured_archaeon_CRA7-0cm	AF119125.1.1042	99.043	0
UNI541	2	5	58	2	0	4	2	5	0	0	0	27	12	0	0	0	6	0	Archaea;Thaumarchaeota;Nitrososphaeria;Nitrosopumilales;Nitrosopumilaceae;uncultured_archaeon_CRA7-0cm	AF119125.1.1042	99.282	0
UNI2737	0	4	3	0	0	8	3	0	0	0	0	1	0	0	0	0	6	0	Archaea;Thaumarchaeota;Nitrososphaeria;Nitrosopumilales;Nitrosopumilaceae;uncultured_archaeon_CRA7-0cm	AF119125.1.1042	99.761	0
UNI2007	0	6	29	0	0	0	2	3	0	0	0	3	3	0	0	0	3	0	Archaea;Thaumarchaeota;Nitrososphaeria;Nitrosopumilales;Nitrosopumilaceae;uncultured_archaeon_CRA7-0cm	AF119125.1.1042	99.043	0
UNI3051	0	5	6	0	0	0	0	4	0	0	0	1	0	0	0	0	5	0	Archaea;Thaumarchaeota;Nitrososphaeria;Nitrosopumilales;Nitrosopumilaceae;uncultured_archaeon_CRA7-0cm	AF119125.1.1042	99.043	0
UNI1073	0	12	6	0	0	29	0	3	0	0	0	2	0	0	0	2	3	0	Archaea;Thaumarchaeota;Nitrososphaeria;Nitrosopumilales;Nitrosopumilaceae;uncultured_archaeon_CRA7-0cm	AF119125.1.1042	99.522	0
UNI788	0	1	9	0	0	5	5	5	0	0	0	11	0	0	0	9	21	0	Archaea;Thaumarchaeota;Nitrososphaeria;Nitrosopumilales;Nitrosopumilaceae;uncultured_archaeon_CRA7-0cm	AF119125.1.1042	99.043	0
UNI3192	0	4	2	0	0	0	0	2	0	0	0	2	0	0	0	0	7	0	Archaea;Thaumarchaeota;Nitrososphaeria;Nitrosopumilales;Nitrosopumilaceae;uncultured_archaeon_CRA7-0cm	AF119125.1.1042	99.282	0
UNI861	0	2	36	8	0	7	1	1	0	0	0	13	3	0	0	0	9	0	Archaea;Thaumarchaeota;Nitrososphaeria;Nitrosopumilales;Nitrosopumilaceae;uncultured_archaeon_CRA7-0cm	AF119125.1.1042	99.282	0
UNI2564	0	2	7	0	0	0	4	4	0	0	0	0	0	0	0	2	3	0	Archaea;Thaumarchaeota;Nitrososphaeria;Nitrosopumilales;Nitrosopumilaceae;uncultured_archaeon_CRA7-0cm	AF119125.1.1042	99.522	0
UNI2102	0	1	7	0	0	1	4	4	0	0	0	0	0	0	0	5	5	0	Archaea;Thaumarchaeota;Nitrososphaeria;Nitrosopumilales;Nitrosopumilaceae;uncultured_archaeon_CRA7-0cm	AF119125.1.1042	99.282	0
UNI2554	0	2	11	3	0	2	1	2	0	0	0	0	1	0	0	0	0	0	Archaea;Thaumarchaeota;Nitrososphaeria;Nitrosopumilales;Nitrosopumilaceae;uncultured_archaeon_CRA7-0cm	AF119125.1.1042	99.282	0
UNI1101	0	2	7	1	0	1	5	10	0	0	0	6	0	0	0	4	11	0	Archaea;Thaumarchaeota;Nitrososphaeria;Nitrosopumilales;Nitrosopumilaceae;uncultured_archaeon_CRA7-0cm	AF119125.1.1042	99.282	0
UNI1637	0	0	2	0	0	12	6	4	3	0	0	1	0	0	0	6	17	0	Archaea;Thaumarchaeota;Nitrososphaeria;Nitrosopumilales;Nitrosopumilaceae;uncultured_archaeon_CRA7-0cm	AF119125.1.1042	99.282	0
UNI949	0	0	5	0	0	0	19	18	1	0	0	0	0	0	0	6	13	0	Archaea;Thaumarchaeota;Nitrososphaeria;Nitrosopumilales;Nitrosopumilaceae;uncultured_archaeon_CRA7-0cm	AF119125.1.1042	99.043	0
UNI3134	0	0	0	0	0	7	2	1	1	0	0	1	0	0	0	4	3	0	Archaea;Thaumarchaeota;Nitrososphaeria;Nitrosopumilales;Nitrosopumilaceae;uncultured_archaeon_CRA7-0cm	AF119125.1.1042	99.522	0
UNI699	0	0	0	0	0	0	19	4	0	0	0	0	0	0	0	23	14	0	Archaea;Thaumarchaeota;Nitrososphaeria;Nitrosopumilales;Nitrosopumilaceae;uncultured_archaeon_CRA7-0cm	AF119125.1.1042	99.043	0
UNI1808	0	0	0	0	0	0	18	1	0	0	0	0	0	0	0	4	1	0	Archaea;Thaumarchaeota;Nitrososphaeria;Nitrosopumilales;Nitrosopumilaceae;uncultured_archaeon_CRA7-0cm	AF119125.1.1042	99.282	0
UNI1521	0	0	0	0	0	0	17	0	0	0	0	0	0	0	0	10	8	0	Archaea;Thaumarchaeota;Nitrososphaeria;Nitrosopumilales;Nitrosopumilaceae;uncultured_archaeon_CRA7-0cm	AF119125.1.1042	99.282	0
UNI2663	0	0	0	0	0	0	11	0	0	0	0	0	0	0	0	4	1	0	Archaea;Thaumarchaeota;Nitrososphaeria;Nitrosopumilales;Nitrosopumilaceae;uncultured_archaeon_CRA7-0cm	AF119125.1.1042	99.522	0
UNI2942	0	0	0	0	0	0	5	2	0	0	0	0	0	0	0	3	1	0	Archaea;Thaumarchaeota;Nitrososphaeria;Nitrosopumilales;Nitrosopumilaceae;uncultured_archaeon_CRA7-0cm	AF119125.1.1042	99.282	0
UNI1571	4	12	6	1	4	0	10	3	0	0	0	0	0	0	0	2	6	0	Archaea;Thaumarchaeota;Nitrososphaeria;Nitrosopumilales;Nitrosopumilaceae;uncultured_crenarchaeote	EF414500.1.912	99.043	0
UNI706	4	23	11	0	0	7	1	12	0	0	0	11	0	0	0	0	7	0	Archaea;Thaumarchaeota;Nitrososphaeria;Nitrosopumilales;Nitrosopumilaceae;uncultured_crenarchaeote	EF414500.1.912	99.043	0
UNI2579	38	5	0	0	3	0	0	0	0	0	0	0	0	0	0	0	0	0	Archaea;Thaumarchaeota;Nitrososphaeria;Nitrosopumilales;Nitrosopumilaceae;uncultured_crenarchaeote	EF414500.1.912	99.282	0
UNI1658	5	2	0	0	33	13	0	0	0	0	0	0	0	0	0	0	0	0	Archaea;Thaumarchaeota;Nitrososphaeria;Nitrosopumilales;Nitrosopumilaceae;uncultured_crenarchaeote	AJ870927.1.915	99.761	0
UNI2497	4	7	6	1	7	0	4	4	0	0	0	4	0	0	0	0	2	0	Archaea;Thaumarchaeota;Nitrososphaeria;Nitrosopumilales;Nitrosopumilaceae;uncultured_crenarchaeote	AJ870927.1.915	99.043	0
UNI1282	9	12	20	0	4	0	6	2	0	0	0	10	0	0	0	2	2	0	Archaea;Thaumarchaeota;Nitrososphaeria;Nitrosopumilales;Nitrosopumilaceae;uncultured_crenarchaeote	AJ870927.1.915	99.282	0
UNI3091	19	5	0	0	0	0	0	0	0	0	0	0	0	0	0	0	0	0	Archaea;Thaumarchaeota;Nitrososphaeria;Nitrosopumilales;Nitrosopumilaceae;uncultured_crenarchaeote	EF414500.1.912	99.043	0
UNI952	18	5	1	32	13	0	0	0	0	0	0	0	5	0	0	0	0	0	Archaea;Thaumarchaeota;Nitrososphaeria;Nitrosopumilales;Nitrosopumilaceae;uncultured_crenarchaeote	EF414498.1.914	99.282	0
UNI337	6	7	7	1	68	19	2	5	0	0	0	1	0	0	0	1	30	0	Archaea;Thaumarchaeota;Nitrososphaeria;Nitrosopumilales;Nitrosopumilaceae;uncultured_crenarchaeote	EF414500.1.912	99.522	0
UNI581	35	6	0	7	18	0	0	0	0	0	0	0	9	0	0	0	0	0	Archaea;Thaumarchaeota;Nitrososphaeria;Nitrosopumilales;Nitrosopumilaceae;uncultured_crenarchaeote	EF414498.1.914	99.522	0
UNI772	18	3	3	31	9	0	0	0	0	0	0	0	1	0	0	0	0	0	Archaea;Thaumarchaeota;Nitrososphaeria;Nitrosopumilales;Nitrosopumilaceae;uncultured_crenarchaeote	EF414498.1.914	99.761	0
UNI1025	27	10	0	11	16	0	0	0	0	0	0	0	6	0	0	0	0	0	Archaea;Thaumarchaeota;Nitrososphaeria;Nitrosopumilales;Nitrosopumilaceae;uncultured_crenarchaeote	EF414498.1.914	99.761	0
UNI1682	14	6	3	0	35	15	0	2	0	0	0	0	0	0	0	0	1	0	Archaea;Thaumarchaeota;Nitrososphaeria;Nitrosopumilales;Nitrosopumilaceae;uncultured_crenarchaeote	AJ870927.1.915	100	0
UNI2093	36	12	0	0	3	0	0	0	0	0	0	0	0	0	0	0	0	0	Archaea;Thaumarchaeota;Nitrososphaeria;Nitrosopumilales;Nitrosopumilaceae;uncultured_crenarchaeote	EF414500.1.912	99.282	0
UNI906	7	2	19	0	8	0	9	10	0	0	0	15	0	0	0	6	10	0	Archaea;Thaumarchaeota;Nitrososphaeria;Nitrosopumilales;Nitrosopumilaceae;uncultured_crenarchaeote	AJ870927.1.915	99.043	0
UNI2374	7	0	0	0	6	20	0	2	0	0	0	0	0	0	0	0	2	0	Archaea;Thaumarchaeota;Nitrososphaeria;Nitrosopumilales;Nitrosopumilaceae;uncultured_crenarchaeote	AJ870927.1.915	99.282	0
UNI1996	9	1	0	6	7	0	0	0	0	0	0	0	0	0	0	0	0	0	Archaea;Thaumarchaeota;Nitrososphaeria;Nitrosopumilales;Nitrosopumilaceae;uncultured_crenarchaeote	EF414498.1.914	99.761	0
UNI1220	13	11	2	41	13	0	0	1	0	0	0	0	5	0	0	0	0	0	Archaea;Thaumarchaeota;Nitrososphaeria;Nitrosopumilales;Nitrosopumilaceae;uncultured_crenarchaeote	EF414498.1.914	99.522	0
UNI512	1	2	12	0	0	1	8	11	22	0	0	11	0	0	0	9	17	4	Archaea;Thaumarchaeota;Nitrososphaeria;Nitrosopumilales;Nitrosopumilaceae;uncultured_crenarchaeote	AJ567641.1.915	99.522	0
UNI617	22	12	1	30	15	0	0	0	0	0	0	0	15	0	0	0	0	0	Archaea;Thaumarchaeota;Nitrososphaeria;Nitrosopumilales;Nitrosopumilaceae;uncultured_crenarchaeote	EF414498.1.914	99.043	0
UNI1132	6	8	14	1	11	0	6	5	0	0	0	13	0	0	0	5	11	0	Archaea;Thaumarchaeota;Nitrososphaeria;Nitrosopumilales;Nitrosopumilaceae;uncultured_crenarchaeote	AJ870927.1.915	99.282	0
UNI2270	8	4	1	10	1	0	0	0	0	0	0	0	2	0	0	0	0	0	Archaea;Thaumarchaeota;Nitrososphaeria;Nitrosopumilales;Nitrosopumilaceae;uncultured_crenarchaeote	EF414498.1.914	99.282	0
UNI2620	9	12	0	0	3	0	0	0	0	0	0	0	0	0	0	0	0	0	Archaea;Thaumarchaeota;Nitrososphaeria;Nitrosopumilales;Nitrosopumilaceae;uncultured_crenarchaeote	EF414500.1.912	99.522	0
UNI2772	5	5	0	0	3	0	0	0	0	0	0	0	0	0	0	0	0	0	Archaea;Thaumarchaeota;Nitrososphaeria;Nitrosopumilales;Nitrosopumilaceae;uncultured_crenarchaeote	EF414500.1.912	99.522	0
UNI1874	9	1	3	6	9	0	0	0	0	0	0	0	0	0	0	0	0	0	Archaea;Thaumarchaeota;Nitrososphaeria;Nitrosopumilales;Nitrosopumilaceae;uncultured_crenarchaeote	EF414498.1.914	99.522	0
UNI2667	1	3	0	0	18	2	0	1	0	0	0	0	0	0	0	0	2	0	Archaea;Thaumarchaeota;Nitrososphaeria;Nitrosopumilales;Nitrosopumilaceae;uncultured_crenarchaeote	EF414500.1.912	99.522	0
UNI290	5	4	0	0	50	25	0	6	0	0	0	4	0	1	0	5	39	0	Archaea;Thaumarchaeota;Nitrososphaeria;Nitrosopumilales;Nitrosopumilaceae;uncultured_crenarchaeote	EF414500.1.912	99.282	0
UNI1379	6	5	0	20	13	0	0	0	0	0	0	0	3	0	0	0	0	0	Archaea;Thaumarchaeota;Nitrososphaeria;Nitrosopumilales;Nitrosopumilaceae;uncultured_crenarchaeote	EF414498.1.914	100	0
UNI3140	4	6	0	0	5	0	0	0	0	0	0	0	0	0	0	0	0	0	Archaea;Thaumarchaeota;Nitrososphaeria;Nitrosopumilales;Nitrosopumilaceae;uncultured_crenarchaeote	EF414500.1.912	99.282	0
UNI1406	11	0	2	0	55	21	0	0	0	0	0	0	0	0	0	0	0	0	Archaea;Thaumarchaeota;Nitrososphaeria;Nitrosopumilales;Nitrosopumilaceae;uncultured_crenarchaeote	AJ870927.1.915	99.522	0
UNI1109	6	7	11	0	2	0	14	3	0	0	0	4	0	0	0	6	10	0	Archaea;Thaumarchaeota;Nitrososphaeria;Nitrosopumilales;Nitrosopumilaceae;uncultured_crenarchaeote	EF414500.1.912	99.522	0
UNI897	8	4	0	33	11	0	0	0	0	0	0	0	5	0	0	0	0	0	Archaea;Thaumarchaeota;Nitrososphaeria;Nitrosopumilales;Nitrosopumilaceae;uncultured_crenarchaeote	EF414498.1.914	99.282	0
UNI455	3	5	2	1	64	10	3	13	0	0	0	1	0	0	0	3	17	0	Archaea;Thaumarchaeota;Nitrososphaeria;Nitrosopumilales;Nitrosopumilaceae;uncultured_crenarchaeote	EF414500.1.912	99.522	0
UNI3513	10	0	0	2	4	8	0	0	0	0	0	0	0	0	0	0	1	0	Archaea;Thaumarchaeota;Nitrososphaeria;Nitrosopumilales;Nitrosopumilaceae;uncultured_crenarchaeote	AJ870927.1.915	99.522	0
UNI1430	1	17	9	1	0	0	1	3	0	0	0	2	0	0	0	1	4	0	Archaea;Thaumarchaeota;Nitrososphaeria;Nitrosopumilales;Nitrosopumilaceae;uncultured_crenarchaeote	EF414500.1.912	99.282	0
UNI1223	4	21	14	0	5	5	2	7	0	0	0	5	0	0	0	0	2	0	Archaea;Thaumarchaeota;Nitrososphaeria;Nitrosopumilales;Nitrosopumilaceae;uncultured_crenarchaeote	EF414500.1.912	99.522	0
UNI2222	2	4	0	17	4	0	0	0	0	0	0	0	1	0	0	0	0	0	Archaea;Thaumarchaeota;Nitrososphaeria;Nitrosopumilales;Nitrosopumilaceae;uncultured_crenarchaeote	EF414498.1.914	99.043	0
UNI730	4	4	8	1	0	0	4	3	20	0	0	10	0	0	0	4	7	9	Archaea;Thaumarchaeota;Nitrososphaeria;Nitrosopumilales;Nitrosopumilaceae;uncultured_crenarchaeote	AJ567641.1.915	99.761	0
UNI2413	2	4	1	0	14	1	0	2	0	0	0	0	1	0	0	1	0	0	Archaea;Thaumarchaeota;Nitrososphaeria;Nitrosopumilales;Nitrosopumilaceae;uncultured_crenarchaeote	EF414500.1.912	99.522	0
UNI608	4	25	10	0	2	17	1	5	0	0	0	3	1	0	0	2	5	0	Archaea;Thaumarchaeota;Nitrososphaeria;Nitrosopumilales;Nitrosopumilaceae;uncultured_crenarchaeote	EF414500.1.912	99.282	0
UNI1180	3	4	2	0	31	8	2	4	0	0	0	1	0	0	0	0	5	0	Archaea;Thaumarchaeota;Nitrososphaeria;Nitrosopumilales;Nitrosopumilaceae;uncultured_crenarchaeote	EF414500.1.912	99.282	0
UNI3086	4	6	6	0	5	0	2	1	0	0	0	6	0	0	0	1	4	0	Archaea;Thaumarchaeota;Nitrososphaeria;Nitrosopumilales;Nitrosopumilaceae;uncultured_crenarchaeote	AJ870927.1.915	99.522	0
UNI2558	3	3	7	0	1	3	3	3	0	0	0	3	0	0	0	1	3	0	Archaea;Thaumarchaeota;Nitrososphaeria;Nitrosopumilales;Nitrosopumilaceae;uncultured_crenarchaeote	EF414500.1.912	99.043	0
UNI2727	2	5	0	2	2	15	0	3	0	0	0	0	0	0	0	0	1	0	Archaea;Thaumarchaeota;Nitrososphaeria;Nitrosopumilales;Nitrosopumilaceae;uncultured_crenarchaeote	AJ870927.1.915	99.522	0
UNI2187	1	1	5	0	0	0	1	6	7	0	0	2	0	0	0	1	1	4	Archaea;Thaumarchaeota;Nitrososphaeria;Nitrosopumilales;Nitrosopumilaceae;uncultured_crenarchaeote	AJ567641.1.915	99.522	0
UNI2907	0	4	0	0	6	10	0	0	0	0	0	0	0	0	0	0	0	0	Archaea;Thaumarchaeota;Nitrososphaeria;Nitrosopumilales;Nitrosopumilaceae;uncultured_crenarchaeote	AJ870927.1.915	99.043	0
UNI2837	0	11	0	1	0	0	0	0	0	0	0	0	0	0	0	0	0	0	Archaea;Thaumarchaeota;Nitrososphaeria;Nitrosopumilales;Nitrosopumilaceae;uncultured_crenarchaeote	EF414500.1.912	99.522	0
UNI1553	0	1	4	0	0	0	5	7	19	0	0	4	0	0	0	6	5	3	Archaea;Thaumarchaeota;Nitrososphaeria;Nitrosopumilales;Nitrosopumilaceae;uncultured_crenarchaeote	AJ567641.1.915	99.761	0
UNI2999	0	12	0	0	0	0	0	0	0	0	0	0	0	0	0	0	0	0	Archaea;Thaumarchaeota;Nitrososphaeria;Nitrosopumilales;Nitrosopumilaceae;uncultured_crenarchaeote	EF414500.1.912	99.282	0
UNI978	0	1	2	1	51	15	0	1	0	0	0	1	0	0	0	0	9	0	Archaea;Thaumarchaeota;Nitrososphaeria;Nitrosopumilales;Nitrosopumilaceae;uncultured_crenarchaeote	EF414500.1.912	99.761	0
UNI508	0	3	13	0	0	0	32	10	0	0	0	1	2	0	0	9	26	0	Archaea;Thaumarchaeota;Nitrososphaeria;Nitrosopumilales;Nitrosopumilaceae;uncultured_crenarchaeote	EF414500.1.912	99.282	0
UNI3502	0	1	1	0	0	1	3	2	19	0	0	4	0	0	0	3	5	1	Archaea;Thaumarchaeota;Nitrososphaeria;Nitrosopumilales;Nitrosopumilaceae;uncultured_crenarchaeote	AJ567641.1.915	100	0
UNI3548	0	1	0	0	14	0	0	0	0	0	0	0	0	0	0	0	0	0	Archaea;Thaumarchaeota;Nitrososphaeria;Nitrosopumilales;Nitrosopumilaceae;uncultured_crenarchaeote	EF414500.1.912	98.804	0
UNI2651	0	0	3	1	15	0	0	3	0	0	0	0	0	0	0	0	0	0	Archaea;Thaumarchaeota;Nitrososphaeria;Nitrosopumilales;Nitrosopumilaceae;uncultured_crenarchaeote	EF414500.1.912	100	0
UNI2900	0	0	2	11	3	0	0	0	0	0	0	0	2	0	0	0	0	0	Archaea;Thaumarchaeota;Nitrososphaeria;Nitrosopumilales;Nitrosopumilaceae;uncultured_crenarchaeote	EF414498.1.914	99.282	0
UNI2043	0	0	0	24	0	0	0	0	0	0	0	0	13	0	0	0	0	0	Archaea;Thaumarchaeota;Nitrososphaeria;Nitrosopumilales;Nitrosopumilaceae;uncultured_crenarchaeote	AJ567647.1.917	99.761	0
UNI1441	22	3	0	22	1	1	0	0	0	0	0	0	1	0	0	0	0	0	Archaea;Thaumarchaeota;Nitrososphaeria;Nitrosopumilales;Nitrosopumilaceae;uncultured_marine_group_I_thaumarchaeote	FJ487558.1.1402	99.282	0
UNI2140	7	14	0	1	0	0	0	2	0	0	0	0	0	0	0	0	5	0	Archaea;Thaumarchaeota;Nitrososphaeria;Nitrosopumilales;Nitrosopumilaceae;uncultured_marine_group_I_thaumarchaeote	FJ487494.1.1368	99.761	0
UNI1330	4	7	2	21	2	0	0	0	0	0	0	1	5	0	0	0	0	0	Archaea;Thaumarchaeota;Nitrososphaeria;Nitrosopumilales;Nitrosopumilaceae;uncultured_marine_group_I_thaumarchaeote	FJ487560.1.1404	99.522	0
UNI36	174	169	58	86	47	2	8	17	0	0	7	21	36	0	0	1	34	0	Archaea;Thaumarchaeota;Nitrososphaeria;Nitrosopumilales;Nitrosopumilaceae;uncultured_marine_group_I_thaumarchaeote	FJ487517.1.1335	99.522	0
UNI62	149	145	46	75	45	2	3	12	0	0	2	10	17	0	0	0	31	0	Archaea;Thaumarchaeota;Nitrososphaeria;Nitrosopumilales;Nitrosopumilaceae;uncultured_marine_group_I_thaumarchaeote	FJ487517.1.1335	99.761	0
UNI63	99	121	32	109	18	0	1	11	0	0	4	12	17	0	0	0	15	0	Archaea;Thaumarchaeota;Nitrososphaeria;Nitrosopumilales;Nitrosopumilaceae;uncultured_marine_group_I_thaumarchaeote	FJ487517.1.1335	99.761	0
UNI341	47	43	5	3	4	0	0	0	0	0	4	7	2	0	0	0	0	0	Archaea;Thaumarchaeota;Nitrososphaeria;Nitrosopumilales;Nitrosopumilaceae;uncultured_marine_group_I_thaumarchaeote	FJ487494.1.1368	99.761	0
UNI1745	3	4	12	3	0	0	1	3	0	0	0	1	0	0	0	0	0	0	Archaea;Thaumarchaeota;Nitrososphaeria;Nitrosopumilales;Nitrosopumilaceae;uncultured_marine_group_I_thaumarchaeote	FJ487532.1.1427	99.761	0
UNI2575	4	1	0	1	23	0	0	0	0	0	0	0	1	0	0	0	0	0	Archaea;Thaumarchaeota;Nitrososphaeria;Nitrosopumilales;Nitrosopumilaceae;uncultured_marine_group_I_thaumarchaeote	FJ487520.1.1339	99.282	0
UNI310	46	51	8	17	6	0	2	5	0	0	0	0	0	0	0	0	2	0	Archaea;Thaumarchaeota;Nitrososphaeria;Nitrosopumilales;Nitrosopumilaceae;uncultured_marine_group_I_thaumarchaeote	FJ487517.1.1335	99.761	0
UNI28	49	105	174	14	33	27	104	58	3	0	0	90	40	0	0	84	70	0	Archaea;Thaumarchaeota;Nitrososphaeria;Nitrosopumilales;Nitrosopumilaceae;uncultured_marine_group_I_thaumarchaeote	FJ487485.1.1370	99.522	0
UNI33	36	121	201	16	39	30	88	60	1	0	0	60	26	0	0	65	71	0	Archaea;Thaumarchaeota;Nitrososphaeria;Nitrosopumilales;Nitrosopumilaceae;uncultured_marine_group_I_thaumarchaeote	FJ487485.1.1370	99.761	0
UNI187	63	81	18	24	15	0	3	5	0	0	0	1	4	0	0	0	7	0	Archaea;Thaumarchaeota;Nitrososphaeria;Nitrosopumilales;Nitrosopumilaceae;uncultured_marine_group_I_thaumarchaeote	FJ487517.1.1335	99.522	0
UNI299	13	34	50	1	12	5	22	20	1	0	0	4	3	0	0	7	5	0	Archaea;Thaumarchaeota;Nitrososphaeria;Nitrosopumilales;Nitrosopumilaceae;uncultured_marine_group_I_thaumarchaeote	FJ487485.1.1370	99.761	0
UNI1278	22	12	0	0	0	0	0	2	0	0	1	0	0	0	0	0	0	0	Archaea;Thaumarchaeota;Nitrososphaeria;Nitrosopumilales;Nitrosopumilaceae;uncultured_marine_group_I_thaumarchaeote	FJ487494.1.1368	99.043	0
UNI447	28	7	1	63	4	0	0	0	0	0	0	0	6	0	0	0	0	0	Archaea;Thaumarchaeota;Nitrososphaeria;Nitrosopumilales;Nitrosopumilaceae;uncultured_marine_group_I_thaumarchaeote	FJ487558.1.1402	99.761	0
UNI388	34	14	1	64	2	0	0	0	1	0	0	0	11	0	0	0	0	0	Archaea;Thaumarchaeota;Nitrososphaeria;Nitrosopumilales;Nitrosopumilaceae;uncultured_marine_group_I_thaumarchaeote	FJ487558.1.1402	99.522	0
UNI103	82	102	21	100	23	3	1	19	0	0	3	14	8	0	0	0	11	0	Archaea;Thaumarchaeota;Nitrososphaeria;Nitrosopumilales;Nitrosopumilaceae;uncultured_marine_group_I_thaumarchaeote	FJ487517.1.1335	100	0
UNI2936	5	3	0	11	6	0	0	0	0	0	0	0	1	0	0	0	0	0	Archaea;Thaumarchaeota;Nitrososphaeria;Nitrosopumilales;Nitrosopumilaceae;uncultured_marine_group_I_thaumarchaeote	FJ487520.1.1339	99.761	0
UNI1599	45	13	1	0	19	0	0	1	0	0	0	0	0	0	0	0	0	0	Archaea;Thaumarchaeota;Nitrososphaeria;Nitrosopumilales;Nitrosopumilaceae;uncultured_marine_group_I_thaumarchaeote	FJ487513.1.1341	99.282	0
UNI816	15	28	0	0	0	0	0	1	0	0	0	0	4	0	0	0	22	0	Archaea;Thaumarchaeota;Nitrososphaeria;Nitrosopumilales;Nitrosopumilaceae;uncultured_marine_group_I_thaumarchaeote	FJ487494.1.1368	99.282	0
UNI3112	17	8	1	0	12	0	1	1	0	0	0	0	0	0	0	0	0	0	Archaea;Thaumarchaeota;Nitrososphaeria;Nitrosopumilales;Nitrosopumilaceae;uncultured_marine_group_I_thaumarchaeote	FJ487513.1.1341	99.761	0
UNI1369	10	7	0	0	42	0	0	0	0	0	0	0	5	0	0	0	0	0	Archaea;Thaumarchaeota;Nitrososphaeria;Nitrosopumilales;Nitrosopumilaceae;uncultured_marine_group_I_thaumarchaeote	FJ487520.1.1339	99.043	0
UNI381	31	29	2	31	12	0	0	0	0	0	0	1	15	0	0	3	1	0	Archaea;Thaumarchaeota;Nitrososphaeria;Nitrosopumilales;Nitrosopumilaceae;uncultured_marine_group_I_thaumarchaeote	FJ487518.1.1368	99.043	0
UNI650	47	22	1	0	0	0	0	3	0	0	1	0	0	0	0	0	3	0	Archaea;Thaumarchaeota;Nitrososphaeria;Nitrosopumilales;Nitrosopumilaceae;uncultured_marine_group_I_thaumarchaeote	FJ487494.1.1368	99.282	0
UNI1795	6	12	9	4	8	12	6	1	1	0	0	2	1	0	0	6	6	0	Archaea;Thaumarchaeota;Nitrososphaeria;Nitrosopumilales;Nitrosopumilaceae;uncultured_marine_group_I_thaumarchaeote	FJ487543.1.1218	99.043	0
UNI1329	18	20	4	1	2	0	0	0	0	0	0	3	1	0	0	0	0	0	Archaea;Thaumarchaeota;Nitrososphaeria;Nitrosopumilales;Nitrosopumilaceae;uncultured_marine_group_I_thaumarchaeote	FJ487494.1.1368	100	0
UNI1323	24	17	1	0	0	0	0	1	0	0	3	0	0	0	0	0	1	0	Archaea;Thaumarchaeota;Nitrososphaeria;Nitrosopumilales;Nitrosopumilaceae;uncultured_marine_group_I_thaumarchaeote	FJ487494.1.1368	99.282	0
UNI757	4	3	8	42	6	0	0	0	0	0	0	10	26	0	0	0	0	0	Archaea;Thaumarchaeota;Nitrososphaeria;Nitrosopumilales;Nitrosopumilaceae;uncultured_marine_group_I_thaumarchaeote	FJ487528.1.1425	99.522	0
UNI1517	10	0	5	0	7	10	0	0	0	0	0	5	2	0	0	0	0	0	Archaea;Thaumarchaeota;Nitrososphaeria;Nitrosopumilales;Nitrosopumilaceae;uncultured_marine_group_I_thaumarchaeote	JN886951.1.915	99.522	0
UNI611	31	24	2	0	2	0	0	0	0	0	1	7	1	0	0	0	0	0	Archaea;Thaumarchaeota;Nitrososphaeria;Nitrosopumilales;Nitrosopumilaceae;uncultured_marine_group_I_thaumarchaeote	FJ487494.1.1368	99.522	0
UNI1828	15	12	0	0	0	0	0	4	0	0	0	0	1	0	0	0	2	0	Archaea;Thaumarchaeota;Nitrososphaeria;Nitrosopumilales;Nitrosopumilaceae;uncultured_marine_group_I_thaumarchaeote	FJ487494.1.1368	99.522	0
UNI948	11	32	0	0	0	0	0	4	0	0	0	0	3	0	0	0	13	0	Archaea;Thaumarchaeota;Nitrososphaeria;Nitrosopumilales;Nitrosopumilaceae;uncultured_marine_group_I_thaumarchaeote	FJ487494.1.1368	99.522	0
UNI1891	8	11	0	0	0	0	0	3	0	0	2	0	0	0	0	0	0	0	Archaea;Thaumarchaeota;Nitrososphaeria;Nitrosopumilales;Nitrosopumilaceae;uncultured_marine_group_I_thaumarchaeote	FJ487494.1.1368	99.282	0
UNI468	25	16	4	23	10	0	0	1	0	0	0	1	13	0	0	2	1	0	Archaea;Thaumarchaeota;Nitrososphaeria;Nitrosopumilales;Nitrosopumilaceae;uncultured_marine_group_I_thaumarchaeote	FJ487518.1.1368	99.282	0
UNI524	38	13	0	42	4	1	0	0	0	0	0	0	13	0	0	0	0	0	Archaea;Thaumarchaeota;Nitrososphaeria;Nitrosopumilales;Nitrosopumilaceae;uncultured_marine_group_I_thaumarchaeote	FJ487558.1.1402	99.282	0
UNI2771	5	1	3	0	1	7	0	0	0	0	0	0	2	0	0	0	0	0	Archaea;Thaumarchaeota;Nitrososphaeria;Nitrosopumilales;Nitrosopumilaceae;uncultured_marine_group_I_thaumarchaeote	JN886951.1.915	100	0
UNI2787	19	8	0	0	18	0	0	0	0	0	1	0	0	0	0	0	1	0	Archaea;Thaumarchaeota;Nitrososphaeria;Nitrosopumilales;Nitrosopumilaceae;uncultured_marine_group_I_thaumarchaeote	FJ487513.1.1341	99.522	0
UNI2487	1	9	3	0	22	9	0	0	0	0	0	0	0	0	0	0	1	0	Archaea;Thaumarchaeota;Nitrososphaeria;Nitrosopumilales;Nitrosopumilaceae;uncultured_marine_group_I_thaumarchaeote	JN886951.1.915	99.522	0
UNI505	25	20	0	42	1	3	0	0	0	0	0	0	8	0	0	0	0	0	Archaea;Thaumarchaeota;Nitrososphaeria;Nitrosopumilales;Nitrosopumilaceae;uncultured_marine_group_I_thaumarchaeote	FJ487558.1.1402	99.522	0
UNI82	27	69	104	14	24	13	54	34	1	0	0	35	18	0	0	34	25	0	Archaea;Thaumarchaeota;Nitrososphaeria;Nitrosopumilales;Nitrosopumilaceae;uncultured_marine_group_I_thaumarchaeote	FJ487485.1.1370	99.761	0
UNI2175	7	20	0	0	0	0	0	0	0	0	0	0	0	0	0	0	0	0	Archaea;Thaumarchaeota;Nitrososphaeria;Nitrosopumilales;Nitrosopumilaceae;uncultured_marine_group_I_thaumarchaeote	FJ487494.1.1368	99.761	0
UNI3149	18	12	0	2	21	1	0	0	0	0	0	1	0	0	0	0	0	0	Archaea;Thaumarchaeota;Nitrososphaeria;Nitrosopumilales;Nitrosopumilaceae;uncultured_marine_group_I_thaumarchaeote	FJ487520.1.1339	99.522	0
UNI954	3	6	8	0	1	0	1	6	0	0	0	13	0	0	0	2	19	0	Archaea;Thaumarchaeota;Nitrososphaeria;Nitrosopumilales;Nitrosopumilaceae;uncultured_marine_group_I_thaumarchaeote	JN886951.1.915	99.522	0
UNI354	6	9	1	91	1	1	6	2	0	0	0	0	16	0	0	2	6	0	Archaea;Thaumarchaeota;Nitrososphaeria;Nitrosopumilales;Nitrosopumilaceae;uncultured_marine_group_I_thaumarchaeote	FJ487560.1.1404	100	0
UNI2836	9	3	1	0	31	1	0	0	0	0	0	0	1	0	0	0	1	0	Archaea;Thaumarchaeota;Nitrososphaeria;Nitrosopumilales;Nitrosopumilaceae;uncultured_marine_group_I_thaumarchaeote	FJ487520.1.1339	99.522	0
UNI1452	18	15	3	0	1	0	0	0	0	0	0	3	2	0	0	0	0	0	Archaea;Thaumarchaeota;Nitrososphaeria;Nitrosopumilales;Nitrosopumilaceae;uncultured_marine_group_I_thaumarchaeote	FJ487494.1.1368	99.761	0
UNI3274	4	0	0	15	0	0	0	0	0	0	0	0	12	0	0	0	0	0	Archaea;Thaumarchaeota;Nitrososphaeria;Nitrosopumilales;Nitrosopumilaceae;uncultured_marine_group_I_thaumarchaeote	FJ487530.1.1436	99.043	0
UNI894	26	18	3	1	0	0	0	3	0	0	4	0	0	0	0	0	0	0	Archaea;Thaumarchaeota;Nitrososphaeria;Nitrosopumilales;Nitrosopumilaceae;uncultured_marine_group_I_thaumarchaeote	FJ487494.1.1368	99.522	0
UNI3243	4	6	0	3	0	0	0	0	0	0	0	0	0	0	0	0	0	0	Archaea;Thaumarchaeota;Nitrososphaeria;Nitrosopumilales;Nitrosopumilaceae;uncultured_marine_group_I_thaumarchaeote	FJ487518.1.1368	99.043	0
UNI2585	26	26	2	5	49	3	0	0	0	0	0	2	3	0	0	0	0	0	Archaea;Thaumarchaeota;Nitrososphaeria;Nitrosopumilales;Nitrosopumilaceae;uncultured_marine_group_I_thaumarchaeote	FJ487520.1.1339	99.282	0
UNI2395	3	1	0	13	0	0	3	0	0	0	0	0	8	0	0	1	0	0	Archaea;Thaumarchaeota;Nitrososphaeria;Nitrosopumilales;Nitrosopumilaceae;uncultured_marine_group_I_thaumarchaeote	FJ487561.1.1404	98.804	0
UNI657	8	2	4	48	0	1	1	0	0	0	0	3	7	0	0	0	1	0	Archaea;Thaumarchaeota;Nitrososphaeria;Nitrosopumilales;Nitrosopumilaceae;uncultured_marine_group_I_thaumarchaeote	FJ487546.1.1426	99.761	0
UNI2976	12	10	3	3	10	1	0	0	0	0	0	0	0	0	0	0	0	0	Archaea;Thaumarchaeota;Nitrososphaeria;Nitrosopumilales;Nitrosopumilaceae;uncultured_marine_group_I_thaumarchaeote	FJ487520.1.1339	99.282	0
UNI268	14	9	4	68	3	0	3	2	0	0	0	2	55	0	0	0	0	0	Archaea;Thaumarchaeota;Nitrososphaeria;Nitrosopumilales;Nitrosopumilaceae;uncultured_marine_group_I_thaumarchaeote	FJ487560.1.1404	99.522	0
UNI1422	18	3	7	0	3	15	0	0	0	0	0	5	0	0	0	0	0	0	Archaea;Thaumarchaeota;Nitrososphaeria;Nitrosopumilales;Nitrosopumilaceae;uncultured_marine_group_I_thaumarchaeote	JN886951.1.915	99.761	0
UNI421	25	22	2	33	8	0	0	0	0	0	0	0	5	0	0	2	2	0	Archaea;Thaumarchaeota;Nitrososphaeria;Nitrosopumilales;Nitrosopumilaceae;uncultured_marine_group_I_thaumarchaeote	FJ487518.1.1368	99.282	0
UNI528	19	20	2	33	6	0	0	0	0	0	0	3	5	0	0	2	1	0	Archaea;Thaumarchaeota;Nitrososphaeria;Nitrosopumilales;Nitrosopumilaceae;uncultured_marine_group_I_thaumarchaeote	FJ487518.1.1368	99.522	0
UNI3304	1	0	0	0	9	0	0	0	0	0	0	0	0	0	0	0	0	0	Archaea;Thaumarchaeota;Nitrososphaeria;Nitrosopumilales;Nitrosopumilaceae;uncultured_marine_group_I_thaumarchaeote	FJ487520.1.1339	99.282	0
UNI565	6	5	14	0	1	0	0	7	1	0	0	23	1	0	0	3	36	0	Archaea;Thaumarchaeota;Nitrososphaeria;Nitrosopumilales;Nitrosopumilaceae;uncultured_marine_group_I_thaumarchaeote	JN886951.1.915	99.282	0
UNI493	52	31	2	0	0	0	0	3	0	0	4	0	0	0	0	0	0	0	Archaea;Thaumarchaeota;Nitrososphaeria;Nitrosopumilales;Nitrosopumilaceae;uncultured_marine_group_I_thaumarchaeote	FJ487494.1.1368	99.043	0
UNI2129	10	8	0	21	4	0	0	0	0	0	0	0	0	0	0	0	0	0	Archaea;Thaumarchaeota;Nitrososphaeria;Nitrosopumilales;Nitrosopumilaceae;uncultured_marine_group_I_thaumarchaeote	FJ487558.1.1402	99.522	0
UNI2233	3	1	2	19	6	2	2	1	0	0	0	1	4	0	0	0	0	0	Archaea;Thaumarchaeota;Nitrososphaeria;Nitrosopumilales;Nitrosopumilaceae;uncultured_marine_group_I_thaumarchaeote	FJ487560.1.1404	99.761	0
UNI221	11	13	52	5	0	0	17	15	0	0	0	23	6	0	0	1	18	0	Archaea;Thaumarchaeota;Nitrososphaeria;Nitrosopumilales;Nitrosopumilaceae;uncultured_marine_group_I_thaumarchaeote	FJ487532.1.1427	99.522	0
UNI1735	33	30	4	5	48	3	0	0	0	0	0	0	2	0	0	0	0	0	Archaea;Thaumarchaeota;Nitrososphaeria;Nitrosopumilales;Nitrosopumilaceae;uncultured_marine_group_I_thaumarchaeote	FJ487520.1.1339	99.282	0
UNI1510	17	22	0	1	46	1	0	0	0	0	0	0	1	0	0	0	0	0	Archaea;Thaumarchaeota;Nitrososphaeria;Nitrosopumilales;Nitrosopumilaceae;uncultured_marine_group_I_thaumarchaeote	FJ487520.1.1339	99.282	0
UNI140	18	54	78	7	10	13	43	27	0	0	0	6	6	0	0	9	11	0	Archaea;Thaumarchaeota;Nitrososphaeria;Nitrosopumilales;Nitrosopumilaceae;uncultured_marine_group_I_thaumarchaeote	FJ487485.1.1370	99.522	0
UNI1631	16	14	0	10	5	0	1	0	0	0	0	0	4	0	0	0	0	0	Archaea;Thaumarchaeota;Nitrososphaeria;Nitrosopumilales;Nitrosopumilaceae;uncultured_marine_group_I_thaumarchaeote	FJ487518.1.1368	99.043	0
UNI2637	1	2	4	1	20	3	2	5	3	0	0	1	6	0	0	0	5	2	Archaea;Thaumarchaeota;Nitrososphaeria;Nitrosopumilales;Nitrosopumilaceae;uncultured_marine_group_I_thaumarchaeote	FJ487506.1.1348	99.761	0
UNI3092	4	14	0	0	0	0	0	1	0	0	0	0	0	0	0	0	2	0	Archaea;Thaumarchaeota;Nitrososphaeria;Nitrosopumilales;Nitrosopumilaceae;uncultured_marine_group_I_thaumarchaeote	FJ487494.1.1368	99.522	0
UNI1338	12	18	2	0	4	0	0	0	0	0	0	2	0	0	0	0	0	0	Archaea;Thaumarchaeota;Nitrososphaeria;Nitrosopumilales;Nitrosopumilaceae;uncultured_marine_group_I_thaumarchaeote	FJ487494.1.1368	99.522	0
UNI3296	10	13	2	19	18	1	0	0	0	0	0	0	3	0	0	0	0	0	Archaea;Thaumarchaeota;Nitrososphaeria;Nitrosopumilales;Nitrosopumilaceae;uncultured_marine_group_I_thaumarchaeote	FJ487520.1.1339	99.282	0
UNI2984	1	5	0	0	18	12	0	1	0	0	0	1	0	0	0	0	2	1	Archaea;Thaumarchaeota;Nitrososphaeria;Nitrosopumilales;Nitrosopumilaceae;uncultured_marine_group_I_thaumarchaeote	JN886951.1.915	99.282	0
UNI3273	5	0	0	12	0	0	0	0	0	0	0	0	3	0	0	0	0	0	Archaea;Thaumarchaeota;Nitrososphaeria;Nitrosopumilales;Nitrosopumilaceae;uncultured_marine_group_I_thaumarchaeote	FJ487530.1.1436	99.282	0
UNI2295	5	0	0	8	0	0	0	0	0	0	0	0	5	0	0	0	0	0	Archaea;Thaumarchaeota;Nitrososphaeria;Nitrosopumilales;Nitrosopumilaceae;uncultured_marine_group_I_thaumarchaeote	FJ487546.1.1426	99.522	0
UNI883	7	9	2	34	1	1	2	0	0	0	0	2	32	0	0	3	0	0	Archaea;Thaumarchaeota;Nitrososphaeria;Nitrosopumilales;Nitrosopumilaceae;uncultured_marine_group_I_thaumarchaeote	FJ487561.1.1404	99.043	0
UNI348	6	1	2	92	4	1	2	4	0	0	0	0	17	0	0	0	0	0	Archaea;Thaumarchaeota;Nitrososphaeria;Nitrosopumilales;Nitrosopumilaceae;uncultured_marine_group_I_thaumarchaeote	FJ487560.1.1404	99.761	0
UNI2086	2	3	14	0	1	1	1	4	0	0	0	8	2	0	0	0	0	0	Archaea;Thaumarchaeota;Nitrososphaeria;Nitrosopumilales;Nitrosopumilaceae;uncultured_marine_group_I_thaumarchaeote	FJ150832.1.1353	96.651	0
UNI2161	12	3	2	0	29	14	0	1	0	0	0	6	1	0	0	0	1	0	Archaea;Thaumarchaeota;Nitrososphaeria;Nitrosopumilales;Nitrosopumilaceae;uncultured_marine_group_I_thaumarchaeote	JN886951.1.915	99.761	0
UNI291	10	15	27	4	0	0	9	13	0	0	0	18	11	0	0	5	13	0	Archaea;Thaumarchaeota;Nitrososphaeria;Nitrosopumilales;Nitrosopumilaceae;uncultured_marine_group_I_thaumarchaeote	FJ487532.1.1427	99.761	0
UNI599	2	2	2	66	0	0	0	0	0	0	0	0	17	0	0	5	0	0	Archaea;Thaumarchaeota;Nitrososphaeria;Nitrosopumilales;Nitrosopumilaceae;uncultured_marine_group_I_thaumarchaeote	FJ487561.1.1404	99.282	0
UNI1103	5	4	13	0	1	12	0	4	0	0	0	10	1	0	0	0	3	0	Archaea;Thaumarchaeota;Nitrososphaeria;Nitrosopumilales;Nitrosopumilaceae;uncultured_marine_group_I_thaumarchaeote	FJ150832.1.1353	96.411	0
UNI78	28	82	83	21	15	13	67	26	0	0	0	38	13	0	0	19	23	0	Archaea;Thaumarchaeota;Nitrososphaeria;Nitrosopumilales;Nitrosopumilaceae;uncultured_marine_group_I_thaumarchaeote	FJ487485.1.1370	100	0
UNI2894	5	0	1	47	0	0	0	0	0	0	0	0	6	0	0	0	0	0	Archaea;Thaumarchaeota;Nitrososphaeria;Nitrosopumilales;Nitrosopumilaceae;uncultured_marine_group_I_thaumarchaeote	FJ487528.1.1425	99.043	0
UNI1793	10	8	1	8	2	0	0	0	0	0	0	0	1	0	0	2	0	0	Archaea;Thaumarchaeota;Nitrososphaeria;Nitrosopumilales;Nitrosopumilaceae;uncultured_marine_group_I_thaumarchaeote	FJ487518.1.1368	99.282	0
UNI904	1	0	0	21	0	0	0	0	0	0	0	0	25	0	0	0	0	0	Archaea;Thaumarchaeota;Nitrososphaeria;Nitrosopumilales;Nitrosopumilaceae;uncultured_marine_group_I_thaumarchaeote	FJ487516.1.1343	99.522	0
UNI782	3	7	23	1	0	0	8	8	0	0	0	5	3	0	0	1	3	0	Archaea;Thaumarchaeota;Nitrososphaeria;Nitrosopumilales;Nitrosopumilaceae;uncultured_marine_group_I_thaumarchaeote	FJ487532.1.1427	100	0
UNI3161	2	6	3	0	12	4	0	2	0	0	0	0	0	0	0	0	0	0	Archaea;Thaumarchaeota;Nitrososphaeria;Nitrosopumilales;Nitrosopumilaceae;uncultured_marine_group_I_thaumarchaeote	JN886951.1.915	99.282	0
UNI2163	4	8	4	0	6	7	2	4	0	0	0	2	2	0	0	4	2	1	Archaea;Thaumarchaeota;Nitrososphaeria;Nitrosopumilales;Nitrosopumilaceae;uncultured_marine_group_I_thaumarchaeote	FJ487543.1.1218	99.282	0
UNI1781	1	2	4	25	4	0	0	0	0	0	0	0	3	0	0	0	0	0	Archaea;Thaumarchaeota;Nitrososphaeria;Nitrosopumilales;Nitrosopumilaceae;uncultured_marine_group_I_thaumarchaeote	FJ487528.1.1425	99.522	0
UNI2438	2	2	0	0	13	0	0	0	0	0	0	0	0	0	0	0	0	0	Archaea;Thaumarchaeota;Nitrososphaeria;Nitrosopumilales;Nitrosopumilaceae;uncultured_marine_group_I_thaumarchaeote	FJ487520.1.1339	99.043	0
UNI863	3	3	6	70	7	0	0	0	0	0	0	1	9	0	0	0	0	0	Archaea;Thaumarchaeota;Nitrososphaeria;Nitrosopumilales;Nitrosopumilaceae;uncultured_marine_group_I_thaumarchaeote	FJ487528.1.1425	100	0
UNI1570	1	6	18	0	2	6	4	7	1	0	0	11	2	0	0	0	5	0	Archaea;Thaumarchaeota;Nitrososphaeria;Nitrosopumilales;Nitrosopumilaceae;uncultured_marine_group_I_thaumarchaeote	FJ150832.1.1353	96.651	0
UNI1339	3	0	0	46	0	0	0	0	0	0	0	0	22	0	0	0	0	0	Archaea;Thaumarchaeota;Nitrososphaeria;Nitrosopumilales;Nitrosopumilaceae;uncultured_marine_group_I_thaumarchaeote	FJ487518.1.1368	99.282	0
UNI3446	2	13	0	0	0	0	0	1	0	0	0	0	0	0	0	0	3	0	Archaea;Thaumarchaeota;Nitrososphaeria;Nitrosopumilales;Nitrosopumilaceae;uncultured_marine_group_I_thaumarchaeote	FJ487494.1.1368	99.282	0
UNI3449	1	3	6	0	0	2	3	7	5	0	0	1	0	0	0	0	2	3	Archaea;Thaumarchaeota;Nitrososphaeria;Nitrosopumilales;Nitrosopumilaceae;uncultured_marine_group_I_thaumarchaeote	FJ487478.1.1375	99.761	0
UNI841	5	6	6	49	9	1	0	0	0	0	0	3	26	1	0	0	0	0	Archaea;Thaumarchaeota;Nitrososphaeria;Nitrosopumilales;Nitrosopumilaceae;uncultured_marine_group_I_thaumarchaeote	FJ487528.1.1425	99.761	0
UNI912	6	8	16	3	0	0	6	4	0	0	0	3	0	0	0	0	3	0	Archaea;Thaumarchaeota;Nitrososphaeria;Nitrosopumilales;Nitrosopumilaceae;uncultured_marine_group_I_thaumarchaeote	FJ487532.1.1427	99.522	0
UNI1779	1	0	1	42	0	0	0	0	0	0	0	0	10	0	0	0	0	0	Archaea;Thaumarchaeota;Nitrososphaeria;Nitrosopumilales;Nitrosopumilaceae;uncultured_marine_group_I_thaumarchaeote	FJ487518.1.1368	99.522	0
UNI467	1	13	18	3	0	0	10	9	0	0	0	10	13	0	0	13	5	0	Archaea;Thaumarchaeota;Nitrososphaeria;Nitrosopumilales;Nitrosopumilaceae;uncultured_marine_group_I_thaumarchaeote	FJ487541.1.1422	99.282	0
UNI332	7	18	8	59	8	0	6	1	0	0	0	3	36	0	0	0	0	0	Archaea;Thaumarchaeota;Nitrososphaeria;Nitrosopumilales;Nitrosopumilaceae;uncultured_marine_group_I_thaumarchaeote	FJ487560.1.1404	99.761	0
UNI3495	4	1	4	0	7	0	2	9	1	0	0	3	1	0	0	5	1	0	Archaea;Thaumarchaeota;Nitrososphaeria;Nitrosopumilales;Nitrosopumilaceae;uncultured_marine_group_I_thaumarchaeote	FJ487506.1.1348	99.282	0
UNI1355	1	0	0	20	0	0	0	0	0	0	0	0	16	0	0	0	0	0	Archaea;Thaumarchaeota;Nitrososphaeria;Nitrosopumilales;Nitrosopumilaceae;uncultured_marine_group_I_thaumarchaeote	FJ487530.1.1436	99.522	0
UNI1027	1	5	1	29	0	0	0	0	0	0	0	1	6	0	0	0	1	0	Archaea;Thaumarchaeota;Nitrososphaeria;Nitrosopumilales;Nitrosopumilaceae;uncultured_marine_group_I_thaumarchaeote	FJ487546.1.1426	100	0
UNI1037	1	3	10	5	0	1	7	5	0	0	0	5	3	0	0	3	8	0	Archaea;Thaumarchaeota;Nitrososphaeria;Nitrosopumilales;Nitrosopumilaceae;uncultured_marine_group_I_thaumarchaeote	FJ487541.1.1422	99.522	0
UNI2373	3	6	2	0	3	0	0	5	0	0	0	3	3	0	0	0	3	0	Archaea;Thaumarchaeota;Nitrososphaeria;Nitrosopumilales;Nitrosopumilaceae;uncultured_marine_group_I_thaumarchaeote	JN886951.1.915	99.761	0
UNI988	2	0	0	23	0	0	0	0	0	0	0	1	14	0	0	0	0	0	Archaea;Thaumarchaeota;Nitrososphaeria;Nitrosopumilales;Nitrosopumilaceae;uncultured_marine_group_I_thaumarchaeote	FJ487516.1.1343	99.761	0
UNI1420	2	0	2	47	0	0	0	0	0	0	0	0	5	0	0	0	0	0	Archaea;Thaumarchaeota;Nitrososphaeria;Nitrosopumilales;Nitrosopumilaceae;uncultured_marine_group_I_thaumarchaeote	FJ487530.1.1436	99.761	0
UNI944	1	0	7	58	0	1	3	2	0	0	0	0	16	0	0	0	0	0	Archaea;Thaumarchaeota;Nitrososphaeria;Nitrosopumilales;Nitrosopumilaceae;uncultured_marine_group_I_thaumarchaeote	FJ487517.1.1335	98.325	0
UNI1206	1	2	19	31	0	0	1	9	0	0	0	1	14	0	0	1	4	0	Archaea;Thaumarchaeota;Nitrososphaeria;Nitrosopumilales;Nitrosopumilaceae;uncultured_marine_group_I_thaumarchaeote	FJ487542.1.1423	99.043	0
UNI600	2	8	19	1	0	0	8	11	0	0	0	13	2	0	0	2	5	0	Archaea;Thaumarchaeota;Nitrososphaeria;Nitrosopumilales;Nitrosopumilaceae;uncultured_marine_group_I_thaumarchaeote	FJ487532.1.1427	99.761	0
UNI2870	3	10	0	0	1	0	0	0	0	0	0	0	0	0	0	0	0	0	Archaea;Thaumarchaeota;Nitrososphaeria;Nitrosopumilales;Nitrosopumilaceae;uncultured_marine_group_I_thaumarchaeote	FJ487560.1.1404	99.522	0
UNI2638	1	1	0	19	0	0	2	0	0	0	0	0	3	0	0	0	0	0	Archaea;Thaumarchaeota;Nitrososphaeria;Nitrosopumilales;Nitrosopumilaceae;uncultured_marine_group_I_thaumarchaeote	FJ487561.1.1404	99.043	0
UNI1365	2	10	9	0	0	0	2	8	0	0	0	7	0	0	0	1	12	0	Archaea;Thaumarchaeota;Nitrososphaeria;Nitrosopumilales;Nitrosopumilaceae;uncultured_marine_group_I_thaumarchaeote	JN886951.1.915	99.522	0
UNI2696	1	2	1	10	0	0	0	0	0	0	0	0	1	0	0	0	0	0	Archaea;Thaumarchaeota;Nitrososphaeria;Nitrosopumilales;Nitrosopumilaceae;uncultured_marine_group_I_thaumarchaeote	FJ487546.1.1426	99.761	0
UNI3373	2	0	0	15	0	0	0	0	0	0	0	0	2	0	0	0	0	0	Archaea;Thaumarchaeota;Nitrososphaeria;Nitrosopumilales;Nitrosopumilaceae;uncultured_marine_group_I_thaumarchaeote	FJ487516.1.1343	99.761	0
UNI518	1	5	16	2	1	3	12	6	0	0	0	11	12	0	0	16	11	0	Archaea;Thaumarchaeota;Nitrososphaeria;Nitrosopumilales;Nitrosopumilaceae;uncultured_marine_group_I_thaumarchaeote	FJ487541.1.1422	99.043	0
UNI1489	1	0	0	21	0	0	0	0	0	0	0	1	16	0	0	1	0	0	Archaea;Thaumarchaeota;Nitrososphaeria;Nitrosopumilales;Nitrosopumilaceae;uncultured_marine_group_I_thaumarchaeote	FJ487530.1.1436	99.282	0
UNI2594	0	3	1	0	23	12	0	0	0	0	0	0	0	0	0	0	2	0	Archaea;Thaumarchaeota;Nitrososphaeria;Nitrosopumilales;Nitrosopumilaceae;uncultured_marine_group_I_thaumarchaeote	JN886951.1.915	99.761	0
UNI2476	0	3	8	1	1	0	7	2	0	0	0	0	3	0	0	3	2	0	Archaea;Thaumarchaeota;Nitrososphaeria;Nitrosopumilales;Nitrosopumilaceae;uncultured_marine_group_I_thaumarchaeote	FJ487541.1.1422	99.043	0
UNI1692	0	1	1	31	0	0	0	0	0	0	0	0	2	0	0	0	0	0	Archaea;Thaumarchaeota;Nitrososphaeria;Nitrosopumilales;Nitrosopumilaceae;uncultured_marine_group_I_thaumarchaeote	FJ487503.1.1363	99.761	0
UNI1577	0	7	8	0	12	7	4	4	7	0	0	1	14	0	0	0	6	3	Archaea;Thaumarchaeota;Nitrososphaeria;Nitrosopumilales;Nitrosopumilaceae;uncultured_marine_group_I_thaumarchaeote	FJ487506.1.1348	99.522	0
UNI899	0	6	4	57	4	0	0	0	0	0	0	3	7	0	0	0	0	0	Archaea;Thaumarchaeota;Nitrososphaeria;Nitrosopumilales;Nitrosopumilaceae;uncultured_marine_group_I_thaumarchaeote	FJ487528.1.1425	99.761	0
UNI1124	0	4	11	6	0	1	10	2	0	0	0	6	5	0	0	7	5	0	Archaea;Thaumarchaeota;Nitrososphaeria;Nitrosopumilales;Nitrosopumilaceae;uncultured_marine_group_I_thaumarchaeote	FJ487541.1.1422	99.282	0
UNI3383	0	5	4	0	0	2	1	13	5	0	0	2	0	0	0	0	4	2	Archaea;Thaumarchaeota;Nitrososphaeria;Nitrosopumilales;Nitrosopumilaceae;uncultured_marine_group_I_thaumarchaeote	FJ487478.1.1375	99.522	0
UNI1062	0	4	8	0	0	6	4	11	5	0	0	5	0	0	0	5	14	8	Archaea;Thaumarchaeota;Nitrososphaeria;Nitrosopumilales;Nitrosopumilaceae;uncultured_marine_group_I_thaumarchaeote	FJ487478.1.1375	99.282	0
UNI1465	0	1	3	26	0	0	0	0	0	0	0	0	3	0	0	0	0	0	Archaea;Thaumarchaeota;Nitrososphaeria;Nitrosopumilales;Nitrosopumilaceae;uncultured_marine_group_I_thaumarchaeote	FJ487503.1.1363	99.522	0
UNI850	0	1	4	64	1	1	1	3	0	0	0	0	2	0	0	0	1	0	Archaea;Thaumarchaeota;Nitrososphaeria;Nitrosopumilales;Nitrosopumilaceae;uncultured_marine_group_I_thaumarchaeote	FJ487542.1.1423	99.043	0
UNI1004	0	1	0	42	0	0	0	0	0	0	0	0	21	0	0	0	0	0	Archaea;Thaumarchaeota;Nitrososphaeria;Nitrosopumilales;Nitrosopumilaceae;uncultured_marine_group_I_thaumarchaeote	FJ487509.1.1345	99.761	0
UNI810	0	8	5	0	0	7	3	30	6	0	0	8	0	0	0	3	9	6	Archaea;Thaumarchaeota;Nitrososphaeria;Nitrosopumilales;Nitrosopumilaceae;uncultured_marine_group_I_thaumarchaeote	FJ487478.1.1375	99.522	0
UNI1591	0	1	1	61	0	0	0	0	0	0	1	0	8	0	0	0	0	0	Archaea;Thaumarchaeota;Nitrososphaeria;Nitrosopumilales;Nitrosopumilaceae;uncultured_marine_group_I_thaumarchaeote	FJ487518.1.1368	99.282	0
UNI668	0	3	0	63	0	0	0	0	0	0	0	0	14	0	0	0	0	0	Archaea;Thaumarchaeota;Nitrososphaeria;Nitrosopumilales;Nitrosopumilaceae;uncultured_marine_group_I_thaumarchaeote	FJ487509.1.1345	99.761	0
UNI2713	0	2	2	16	0	0	2	1	0	0	0	0	0	0	0	0	0	0	Archaea;Thaumarchaeota;Nitrososphaeria;Nitrosopumilales;Nitrosopumilaceae;uncultured_marine_group_I_thaumarchaeote	FJ487542.1.1423	99.043	0
UNI609	0	1	0	55	0	0	0	0	0	0	0	0	18	0	0	0	0	0	Archaea;Thaumarchaeota;Nitrososphaeria;Nitrosopumilales;Nitrosopumilaceae;uncultured_marine_group_I_thaumarchaeote	FJ487542.1.1423	98.086	0
UNI3257	0	3	0	5	0	0	0	0	0	0	0	0	2	0	0	0	0	0	Archaea;Thaumarchaeota;Nitrososphaeria;Nitrosopumilales;Nitrosopumilaceae;uncultured_marine_group_I_thaumarchaeote	FJ487530.1.1436	98.804	0
UNI3464	0	2	5	6	0	0	1	1	0	0	0	0	5	0	0	0	2	0	Archaea;Thaumarchaeota;Nitrososphaeria;Nitrosopumilales;Nitrosopumilaceae;uncultured_marine_group_I_thaumarchaeote	FJ487542.1.1423	98.804	0
UNI1525	0	2	12	41	0	0	3	3	0	0	0	0	10	0	0	2	4	0	Archaea;Thaumarchaeota;Nitrososphaeria;Nitrosopumilales;Nitrosopumilaceae;uncultured_marine_group_I_thaumarchaeote	FJ487542.1.1423	98.804	0
UNI3545	0	3	1	0	1	0	5	1	0	0	0	4	1	0	0	0	1	0	Archaea;Thaumarchaeota;Nitrososphaeria;Nitrosopumilales;Nitrosopumilaceae;uncultured_marine_group_I_thaumarchaeote	FJ487541.1.1422	99.282	0
UNI979	0	0	1	46	0	0	0	0	0	0	0	0	12	0	0	0	0	0	Archaea;Thaumarchaeota;Nitrososphaeria;Nitrosopumilales;Nitrosopumilaceae;uncultured_marine_group_I_thaumarchaeote	FJ487518.1.1368	99.522	0
UNI1548	0	0	3	30	0	0	0	2	0	0	0	0	22	0	0	0	5	0	Archaea;Thaumarchaeota;Nitrososphaeria;Nitrosopumilales;Nitrosopumilaceae;uncultured_marine_group_I_thaumarchaeote	FJ487520.1.1339	99.522	0
UNI2047	0	0	7	44	0	0	0	0	0	0	0	0	21	1	0	0	0	0	Archaea;Thaumarchaeota;Nitrososphaeria;Nitrosopumilales;Nitrosopumilaceae;uncultured_marine_group_I_thaumarchaeote	FJ487512.1.1339	99.761	0
UNI2362	0	0	1	17	0	0	0	0	0	0	0	0	6	0	0	0	0	0	Archaea;Thaumarchaeota;Nitrososphaeria;Nitrosopumilales;Nitrosopumilaceae;uncultured_marine_group_I_thaumarchaeote	FJ487512.1.1339	99.761	0
UNI2216	0	0	8	0	0	0	1	1	0	0	0	5	12	0	0	0	0	0	Archaea;Thaumarchaeota;Nitrososphaeria;Nitrosopumilales;Nitrosopumilaceae;uncultured_marine_group_I_thaumarchaeote	FJ487506.1.1348	99.043	0
UNI940	0	0	11	58	0	0	4	4	0	0	0	0	1	0	0	1	1	0	Archaea;Thaumarchaeota;Nitrososphaeria;Nitrosopumilales;Nitrosopumilaceae;uncultured_marine_group_I_thaumarchaeote	FJ487542.1.1423	99.282	0
UNI2256	0	0	1	19	0	0	0	0	0	0	0	0	6	0	0	0	0	0	Archaea;Thaumarchaeota;Nitrososphaeria;Nitrosopumilales;Nitrosopumilaceae;uncultured_marine_group_I_thaumarchaeote	FJ487561.1.1404	99.043	0
UNI1086	0	0	3	34	0	0	0	0	0	0	0	0	4	0	0	0	0	0	Archaea;Thaumarchaeota;Nitrososphaeria;Nitrosopumilales;Nitrosopumilaceae;uncultured_marine_group_I_thaumarchaeote	FJ487518.1.1368	99.761	0
UNI3426	0	0	2	9	0	0	0	0	0	0	0	0	4	0	0	0	0	0	Archaea;Thaumarchaeota;Nitrososphaeria;Nitrosopumilales;Nitrosopumilaceae;uncultured_marine_group_I_thaumarchaeote	FJ487520.1.1339	100	0
UNI3255	0	0	1	12	0	0	0	0	0	0	0	1	5	0	0	0	0	0	Archaea;Thaumarchaeota;Nitrososphaeria;Nitrosopumilales;Nitrosopumilaceae;uncultured_marine_group_I_thaumarchaeote	FJ487530.1.1436	99.282	0
UNI3413	0	0	3	0	0	0	3	0	0	0	0	3	6	0	0	0	0	0	Archaea;Thaumarchaeota;Nitrososphaeria;Nitrosopumilales;Nitrosopumilaceae;uncultured_marine_group_I_thaumarchaeote	FJ487506.1.1348	98.804	0
UNI2089	0	0	3	37	0	0	0	0	0	0	0	0	8	0	0	0	0	0	Archaea;Thaumarchaeota;Nitrososphaeria;Nitrosopumilales;Nitrosopumilaceae;uncultured_marine_group_I_thaumarchaeote	FJ487530.1.1436	98.804	0
UNI830	0	0	2	0	1	4	5	14	0	0	0	0	0	0	0	11	29	0	Archaea;Thaumarchaeota;Nitrososphaeria;Nitrosopumilales;Nitrosopumilaceae;uncultured_marine_group_I_thaumarchaeote	FJ150832.1.1353	96.651	0
UNI2372	0	0	2	15	0	0	0	0	0	0	0	0	0	0	0	0	0	0	Archaea;Thaumarchaeota;Nitrososphaeria;Nitrosopumilales;Nitrosopumilaceae;uncultured_marine_group_I_thaumarchaeote	FJ487528.1.1425	99.761	0
UNI2002	0	0	1	23	0	0	0	0	0	0	0	0	2	0	0	0	0	0	Archaea;Thaumarchaeota;Nitrososphaeria;Nitrosopumilales;Nitrosopumilaceae;uncultured_marine_group_I_thaumarchaeote	FJ487530.1.1436	99.522	0
UNI1683	0	0	1	17	0	0	0	0	0	0	0	0	10	0	0	0	0	0	Archaea;Thaumarchaeota;Nitrososphaeria;Nitrosopumilales;Nitrosopumilaceae;uncultured_marine_group_I_thaumarchaeote	FJ487524.1.1439	99.043	0
UNI3327	0	0	1	12	0	0	0	2	0	0	0	0	3	0	0	0	0	0	Archaea;Thaumarchaeota;Nitrososphaeria;Nitrosopumilales;Nitrosopumilaceae;uncultured_marine_group_I_thaumarchaeote	FJ487542.1.1423	98.325	0
UNI1390	0	0	1	30	0	0	0	0	0	0	0	1	7	0	0	0	0	0	Archaea;Thaumarchaeota;Nitrososphaeria;Nitrosopumilales;Nitrosopumilaceae;uncultured_marine_group_I_thaumarchaeote	FJ487516.1.1343	100	0
UNI2736	0	0	1	0	2	2	1	12	0	0	0	0	1	0	0	2	10	0	Archaea;Thaumarchaeota;Nitrososphaeria;Nitrosopumilales;Nitrosopumilaceae;uncultured_marine_group_I_thaumarchaeote	FJ150832.1.1353	96.89	0
UNI701	0	0	3	75	0	0	0	1	0	0	0	0	8	0	0	0	2	0	Archaea;Thaumarchaeota;Nitrososphaeria;Nitrosopumilales;Nitrosopumilaceae;uncultured_marine_group_I_thaumarchaeote	FJ487517.1.1335	98.565	0
UNI951	0	0	1	1	4	8	3	9	0	0	0	0	0	0	0	8	22	0	Archaea;Thaumarchaeota;Nitrososphaeria;Nitrosopumilales;Nitrosopumilaceae;uncultured_marine_group_I_thaumarchaeote	FJ150832.1.1353	96.89	0
UNI1318	0	0	0	47	1	0	0	0	0	0	0	0	27	0	0	0	0	0	Archaea;Thaumarchaeota;Nitrososphaeria;Nitrosopumilales;Nitrosopumilaceae;uncultured_marine_group_I_thaumarchaeote	FJ487518.1.1368	99.043	0
UNI1476	0	0	0	27	0	0	0	0	0	0	0	0	4	0	0	0	0	0	Archaea;Thaumarchaeota;Nitrososphaeria;Nitrosopumilales;Nitrosopumilaceae;uncultured_marine_group_I_thaumarchaeote	FJ487524.1.1439	99.282	0
UNI1817	0	0	0	19	0	0	0	0	0	0	0	0	8	0	0	0	0	0	Archaea;Thaumarchaeota;Nitrososphaeria;Nitrosopumilales;Nitrosopumilaceae;uncultured_marine_group_I_thaumarchaeote	FJ487503.1.1363	99.282	0
UNI720	0	0	0	44	0	0	0	0	0	0	0	0	19	0	0	0	0	0	Archaea;Thaumarchaeota;Nitrososphaeria;Nitrosopumilales;Nitrosopumilaceae;uncultured_marine_group_I_thaumarchaeote	FJ487542.1.1423	98.325	0
UNI1152	0	0	0	39	0	0	0	0	0	0	0	0	5	0	0	0	0	0	Archaea;Thaumarchaeota;Nitrososphaeria;Nitrosopumilales;Nitrosopumilaceae;uncultured_marine_group_I_thaumarchaeote	FJ487542.1.1423	98.565	0
UNI1174	0	0	0	31	0	0	0	0	0	0	0	0	3	0	0	0	0	0	Archaea;Thaumarchaeota;Nitrososphaeria;Nitrosopumilales;Nitrosopumilaceae;uncultured_marine_group_I_thaumarchaeote	FJ487518.1.1368	100	0
UNI3048	0	0	0	8	0	0	0	0	0	0	0	0	6	0	0	0	0	0	Archaea;Thaumarchaeota;Nitrososphaeria;Nitrosopumilales;Nitrosopumilaceae;uncultured_marine_group_I_thaumarchaeote	FJ487518.1.1368	99.282	0
UNI2720	0	0	0	15	0	0	0	0	0	0	0	0	5	0	0	0	0	0	Archaea;Thaumarchaeota;Nitrososphaeria;Nitrosopumilales;Nitrosopumilaceae;uncultured_marine_group_I_thaumarchaeote	FJ487518.1.1368	99.043	0
UNI2501	0	0	0	16	0	0	0	0	0	0	0	0	1	0	0	0	0	0	Archaea;Thaumarchaeota;Nitrososphaeria;Nitrosopumilales;Nitrosopumilaceae;uncultured_marine_group_I_thaumarchaeote	FJ487518.1.1368	99.282	0
UNI1209	0	0	0	18	0	0	0	0	0	0	0	0	17	0	0	0	0	0	Archaea;Thaumarchaeota;Nitrososphaeria;Nitrosopumilales;Nitrosopumilaceae;uncultured_marine_group_I_thaumarchaeote	FJ487524.1.1439	98.804	0
UNI1748	0	0	0	35	0	0	0	0	0	0	0	1	18	0	0	0	0	0	Archaea;Thaumarchaeota;Nitrososphaeria;Nitrosopumilales;Nitrosopumilaceae;uncultured_marine_group_I_thaumarchaeote	FJ487517.1.1335	98.565	0
UNI1688	0	0	0	21	0	0	0	0	0	0	0	0	5	0	0	0	0	0	Archaea;Thaumarchaeota;Nitrososphaeria;Nitrosopumilales;Nitrosopumilaceae;uncultured_marine_group_I_thaumarchaeote	FJ487524.1.1439	99.043	0
UNI3364	0	0	0	10	0	0	0	0	0	0	0	0	0	0	0	0	0	0	Archaea;Thaumarchaeota;Nitrososphaeria;Nitrosopumilales;Nitrosopumilaceae;uncultured_marine_group_I_thaumarchaeote	FJ487524.1.1439	98.804	0
UNI806	0	0	0	36	0	0	0	0	0	0	0	0	11	0	0	0	0	0	Archaea;Thaumarchaeota;Nitrososphaeria;Nitrosopumilales;Nitrosopumilaceae;uncultured_marine_group_I_thaumarchaeote	FJ487542.1.1423	98.565	0
UNI2048	0	0	0	24	0	0	0	0	0	0	0	0	3	0	0	0	0	0	Archaea;Thaumarchaeota;Nitrososphaeria;Nitrosopumilales;Nitrosopumilaceae;uncultured_marine_group_I_thaumarchaeote	FJ487518.1.1368	98.804	0
UNI2303	0	0	0	17	0	0	0	0	0	0	0	0	1	0	0	0	0	0	Archaea;Thaumarchaeota;Nitrososphaeria;Nitrosopumilales;Nitrosopumilaceae;uncultured_marine_group_I_thaumarchaeote	FJ487542.1.1423	98.325	0
UNI2101	0	0	0	21	0	0	0	0	0	0	0	0	2	0	0	0	0	0	Archaea;Thaumarchaeota;Nitrososphaeria;Nitrosopumilales;Nitrosopumilaceae;uncultured_marine_group_I_thaumarchaeote	FJ487503.1.1363	99.522	0
UNI1414	0	0	0	47	0	0	0	0	0	0	0	0	0	0	0	0	0	0	Archaea;Thaumarchaeota;Nitrososphaeria;Nitrosopumilales;Nitrosopumilaceae;uncultured_marine_group_I_thaumarchaeote	FJ487517.1.1335	98.804	0
UNI2064	0	0	0	16	0	0	0	0	0	0	0	0	8	0	0	0	0	0	Archaea;Thaumarchaeota;Nitrososphaeria;Nitrosopumilales;Nitrosopumilaceae;uncultured_marine_group_I_thaumarchaeote	FJ487542.1.1423	98.565	0
UNI3529	0	0	0	11	0	0	0	0	0	0	0	0	6	0	0	0	0	0	Archaea;Thaumarchaeota;Nitrososphaeria;Nitrosopumilales;Nitrosopumilaceae;uncultured_marine_group_I_thaumarchaeote	FJ487518.1.1368	99.522	0
UNI939	0	0	0	46	0	0	0	0	0	0	0	0	8	0	0	0	0	0	Archaea;Thaumarchaeota;Nitrososphaeria;Nitrosopumilales;Nitrosopumilaceae;uncultured_marine_group_I_thaumarchaeote	FJ487509.1.1345	100	0
UNI1434	0	0	0	20	0	0	0	0	0	0	0	0	11	0	0	0	0	0	Archaea;Thaumarchaeota;Nitrososphaeria;Nitrosopumilales;Nitrosopumilaceae;uncultured_marine_group_I_thaumarchaeote	FJ487518.1.1368	99.761	0
UNI3263	0	0	0	11	0	0	0	0	0	0	0	0	0	0	0	0	0	0	Archaea;Thaumarchaeota;Nitrososphaeria;Nitrosopumilales;Nitrosopumilaceae;uncultured_marine_group_I_thaumarchaeote	FJ487516.1.1343	99.522	0
UNI537	0	0	0	65	0	0	0	0	0	0	0	0	2	0	0	0	0	0	Archaea;Thaumarchaeota;Nitrososphaeria;Nitrosopumilales;Nitrosopumilaceae;uncultured_marine_group_I_thaumarchaeote	FJ487542.1.1423	98.325	0
UNI2627	0	0	0	14	0	0	0	0	0	0	0	0	1	0	0	0	0	0	Archaea;Thaumarchaeota;Nitrososphaeria;Nitrosopumilales;Nitrosopumilaceae;uncultured_marine_group_I_thaumarchaeote	FJ487518.1.1368	99.522	0
UNI1573	0	0	0	19	0	0	0	0	0	0	0	0	6	0	0	0	0	0	Archaea;Thaumarchaeota;Nitrososphaeria;Nitrosopumilales;Nitrosopumilaceae;uncultured_marine_group_I_thaumarchaeote	FJ487542.1.1423	98.804	0
UNI1003	0	0	0	29	0	0	0	0	0	0	0	0	18	0	0	0	0	0	Archaea;Thaumarchaeota;Nitrososphaeria;Nitrosopumilales;Nitrosopumilaceae;uncultured_marine_group_I_thaumarchaeote	FJ487509.1.1345	99.522	0
UNI2316	0	0	0	20	0	0	0	0	0	0	0	0	0	0	0	0	0	0	Archaea;Thaumarchaeota;Nitrososphaeria;Nitrosopumilales;Nitrosopumilaceae;uncultured_marine_group_I_thaumarchaeote	FJ487518.1.1368	99.043	0
UNI1818	0	0	0	19	0	0	0	0	0	0	0	0	5	0	0	0	0	0	Archaea;Thaumarchaeota;Nitrososphaeria;Nitrosopumilales;Nitrosopumilaceae;uncultured_marine_group_I_thaumarchaeote	JN886940.1.914	98.804	0
UNI1000	0	0	0	39	0	0	0	0	0	0	0	0	11	0	0	0	0	0	Archaea;Thaumarchaeota;Nitrososphaeria;Nitrosopumilales;Nitrosopumilaceae;uncultured_marine_group_I_thaumarchaeote	FJ487516.1.1343	99.761	0
UNI2479	0	0	0	17	0	0	0	0	0	0	0	0	2	0	0	0	0	0	Archaea;Thaumarchaeota;Nitrososphaeria;Nitrosopumilales;Nitrosopumilaceae;uncultured_marine_group_I_thaumarchaeote	FJ487518.1.1368	99.043	0
UNI1905	0	0	0	16	0	0	0	0	0	0	0	0	6	0	0	0	0	0	Archaea;Thaumarchaeota;Nitrososphaeria;Nitrosopumilales;Nitrosopumilaceae;uncultured_marine_group_I_thaumarchaeote	JN886940.1.914	98.565	0
UNI3070	0	0	0	9	0	0	0	0	0	0	0	0	5	0	0	0	0	0	Archaea;Thaumarchaeota;Nitrososphaeria;Nitrosopumilales;Nitrosopumilaceae;uncultured_marine_group_I_thaumarchaeote	FJ487518.1.1368	99.043	0
UNI3174	0	0	0	6	0	0	0	0	0	0	0	0	5	0	0	0	0	0	Archaea;Thaumarchaeota;Nitrososphaeria;Nitrosopumilales;Nitrosopumilaceae;uncultured_marine_group_I_thaumarchaeote	FJ487518.1.1368	98.804	0
UNI3401	0	0	0	10	0	0	0	0	0	0	0	0	2	0	0	0	0	0	Archaea;Thaumarchaeota;Nitrososphaeria;Nitrosopumilales;Nitrosopumilaceae;uncultured_marine_group_I_thaumarchaeote	FJ487518.1.1368	99.522	0
UNI2952	0	0	0	9	0	0	0	0	0	0	0	0	2	0	0	0	0	0	Archaea;Thaumarchaeota;Nitrososphaeria;Nitrosopumilales;Nitrosopumilaceae;uncultured_marine_group_I_thaumarchaeote	FJ487518.1.1368	99.761	0
UNI3510	0	0	0	7	0	0	1	0	0	0	0	0	0	0	0	0	0	0	Archaea;Thaumarchaeota;Nitrososphaeria;Nitrosopumilales;Nitrosopumilaceae;uncultured_marine_group_I_thaumarchaeote	JN886940.1.914	98.325	0
UNI1671	0	0	0	15	0	0	0	0	0	0	0	0	7	0	0	0	0	0	Archaea;Thaumarchaeota;Nitrososphaeria;Nitrosopumilales;Nitrosopumilaceae;uncultured_marine_group_I_thaumarchaeote	FJ487542.1.1423	98.325	0
UNI1847	0	0	0	0	44	3	0	0	0	0	0	0	0	0	0	0	0	0	Archaea;Thaumarchaeota;Nitrososphaeria;Nitrosopumilales;Nitrosopumilaceae;uncultured_marine_group_I_thaumarchaeote	JN886951.1.915	99.522	0
UNI2433	0	0	0	0	17	1	0	0	0	0	0	0	0	0	0	0	0	0	Archaea;Thaumarchaeota;Nitrososphaeria;Nitrosopumilales;Nitrosopumilaceae;uncultured_marine_group_I_thaumarchaeote	JN886951.1.915	99.282	0
UNI3297	0	0	0	0	1	0	0	6	0	0	0	0	0	0	0	1	7	0	Archaea;Thaumarchaeota;Nitrososphaeria;Nitrosopumilales;Nitrosopumilaceae;uncultured_marine_group_I_thaumarchaeote	FJ150832.1.1353	96.651	0
UNI3344	0	0	0	0	0	6	0	0	33	0	0	0	0	0	0	0	0	17	Archaea;Thaumarchaeota;Nitrososphaeria;Nitrosopumilales;Nitrosopumilaceae;uncultured_marine_group_I_thaumarchaeote	FJ150832.1.1353	98.565	0
UNI2706	0	0	0	0	0	2	2	7	0	0	0	1	0	0	0	1	8	0	Archaea;Thaumarchaeota;Nitrososphaeria;Nitrosopumilales;Nitrosopumilaceae;uncultured_marine_group_I_thaumarchaeote	FJ150832.1.1353	97.129	0
UNI3109	0	0	0	0	0	0	8	10	0	0	0	0	0	0	0	5	22	0	Archaea;Thaumarchaeota;Nitrososphaeria;Nitrosopumilales;Nitrosopumilaceae;uncultured_marine_group_I_thaumarchaeote	FJ487560.1.1404	99.043	0
UNI2591	5	7	1	0	1	0	0	3	0	0	0	0	0	0	0	0	15	0	Archaea;Thaumarchaeota;Nitrososphaeria;Nitrosopumilales;Nitrosopumilaceae;uncultured_Nitrosopumilales_archaeon	EF069354.1.1439	99.043	0
UNI1227	5	24	1	0	6	9	1	0	0	0	0	0	1	0	0	1	0	0	Archaea;Thaumarchaeota;Nitrososphaeria;Nitrosopumilales;Nitrosopumilaceae;uncultured_Nitrosopumilales_archaeon	EF069384.1.1439	99.522	0
UNI2228	4	4	2	0	16	6	2	3	0	0	0	2	1	0	0	1	5	0	Archaea;Thaumarchaeota;Nitrososphaeria;Nitrosopumilales;Nitrosopumilaceae;uncultured_Nitrosopumilales_archaeon	EF069354.1.1439	99.761	0
UNI1597	2	13	5	0	0	2	1	5	0	0	0	2	0	0	0	1	3	0	Archaea;Thaumarchaeota;Nitrososphaeria;Nitrosopumilales;Nitrosopumilaceae;uncultured_Nitrosopumilales_archaeon	EF069374.1.1441	99.523	0
UNI502	3	13	5	0	15	10	8	4	19	0	0	2	0	0	0	3	0	2	Archaea;Thaumarchaeota;Nitrososphaeria;Nitrosopumilales;Nitrosopumilaceae;uncultured_Nitrosopumilales_archaeon	EF069365.1.1440	99.761	0
UNI2126	5	9	4	0	0	0	1	5	0	0	0	0	0	0	0	0	1	0	Archaea;Thaumarchaeota;Nitrososphaeria;Nitrosopumilales;Nitrosopumilaceae;uncultured_Nitrosopumilales_archaeon	EF069374.1.1441	99.761	0
UNI1624	3	14	1	0	1	5	0	0	0	0	0	0	0	0	0	0	1	0	Archaea;Thaumarchaeota;Nitrososphaeria;Nitrosopumilales;Nitrosopumilaceae;uncultured_Nitrosopumilales_archaeon	EF069384.1.1439	99.761	0
UNI2488	1	13	1	0	2	9	0	0	0	0	0	0	1	0	0	0	0	0	Archaea;Thaumarchaeota;Nitrososphaeria;Nitrosopumilales;Nitrosopumilaceae;uncultured_Nitrosopumilales_archaeon	EF069384.1.1439	99.761	0
UNI2287	3	5	5	0	0	3	0	2	0	0	0	0	0	0	0	0	3	0	Archaea;Thaumarchaeota;Nitrososphaeria;Nitrosopumilales;Nitrosopumilaceae;uncultured_Nitrosopumilales_archaeon	EF069374.1.1441	99.523	0
UNI1485	3	12	4	0	0	2	3	7	3	0	0	3	0	0	0	2	7	0	Archaea;Thaumarchaeota;Nitrososphaeria;Nitrosopumilales;Nitrosopumilaceae;uncultured_Nitrosopumilales_archaeon	EF069374.1.1441	99.284	0
UNI231	5	29	6	0	28	19	5	6	17	0	0	7	0	0	0	9	3	16	Archaea;Thaumarchaeota;Nitrososphaeria;Nitrosopumilales;Nitrosopumilaceae;uncultured_Nitrosopumilales_archaeon	EF069365.1.1440	99.282	0
UNI220	0	28	7	0	25	23	4	9	31	0	0	2	1	0	0	11	4	10	Archaea;Thaumarchaeota;Nitrososphaeria;Nitrosopumilales;Nitrosopumilaceae;uncultured_Nitrosopumilales_archaeon	EF069365.1.1440	99.522	0
UNI3392	0	10	0	0	2	3	0	0	0	0	0	0	0	0	0	0	0	0	Archaea;Thaumarchaeota;Nitrososphaeria;Nitrosopumilales;Nitrosopumilaceae;uncultured_Nitrosopumilales_archaeon	EF069384.1.1439	100	0
UNI430	0	17	3	0	21	9	8	1	19	0	0	3	0	0	0	6	0	5	Archaea;Thaumarchaeota;Nitrososphaeria;Nitrosopumilales;Nitrosopumilaceae;uncultured_Nitrosopumilales_archaeon	EF069365.1.1440	99.522	0
UNI1873	0	4	5	1	14	3	2	5	0	0	0	2	0	0	0	2	3	0	Archaea;Thaumarchaeota;Nitrososphaeria;Nitrosopumilales;Nitrosopumilaceae;uncultured_Nitrosopumilales_archaeon	EF069354.1.1439	99.282	0
UNI777	0	3	31	0	0	0	5	14	0	0	0	11	1	0	0	2	17	1	Archaea;Thaumarchaeota;Nitrososphaeria;Nitrosopumilales;Nitrosopumilaceae;uncultured_Nitrosopumilales_archaeon	EF069365.1.1440	99.043	0
UNI670	0	4	26	0	0	0	1	12	1	0	0	24	0	0	0	1	11	0	Archaea;Thaumarchaeota;Nitrososphaeria;Nitrosopumilales;Nitrosopumilaceae;uncultured_Nitrosopumilales_archaeon	EF069365.1.1440	99.282	0
UNI2377	0	4	3	1	9	1	2	4	0	0	0	2	0	0	0	1	14	0	Archaea;Thaumarchaeota;Nitrososphaeria;Nitrosopumilales;Nitrosopumilaceae;uncultured_Nitrosopumilales_archaeon	EF069354.1.1439	99.522	0
UNI1829	0	1	14	0	0	0	0	6	1	0	0	5	3	0	0	1	5	0	Archaea;Thaumarchaeota;Nitrososphaeria;Nitrosopumilales;Nitrosopumilaceae;uncultured_Nitrosopumilales_archaeon	EF069365.1.1440	99.522	0
UNI1568	0	2	11	0	0	0	3	8	1	0	0	13	2	0	0	1	3	0	Archaea;Thaumarchaeota;Nitrososphaeria;Nitrosopumilales;Nitrosopumilaceae;uncultured_Nitrosopumilales_archaeon	EF069365.1.1440	99.282	0
UNI2336	0	1	2	0	0	0	12	7	0	0	0	1	0	0	0	2	8	0	Archaea;Thaumarchaeota;Nitrososphaeria;Nitrosopumilales;Nitrosopumilaceae;uncultured_Nitrosopumilales_archaeon	EF069374.1.1441	99.284	0
UNI3258	0	2	3	0	7	0	3	4	0	0	0	0	0	0	0	1	6	0	Archaea;Thaumarchaeota;Nitrososphaeria;Nitrosopumilales;Nitrosopumilaceae;uncultured_Nitrosopumilales_archaeon	EF069354.1.1439	99.522	0
UNI1445	0	0	10	1	0	0	4	1	0	0	0	8	2	0	0	13	2	0	Archaea;Thaumarchaeota;Nitrososphaeria;Nitrosopumilales;Nitrosopumilaceae;uncultured_Nitrosopumilales_archaeon	EF069384.1.1439	99.043	0
UNI2537	0	0	9	0	0	0	1	2	0	0	0	3	2	0	0	5	3	0	Archaea;Thaumarchaeota;Nitrososphaeria;Nitrosopumilales;Nitrosopumilaceae;uncultured_Nitrosopumilales_archaeon	EF069384.1.1439	99.282	0
UNI2958	0	0	3	0	0	0	6	1	0	0	0	0	0	0	0	2	4	0	Archaea;Thaumarchaeota;Nitrososphaeria;Nitrosopumilales;Nitrosopumilaceae;uncultured_Nitrosopumilales_archaeon	EF069384.1.1439	99.043	0
UNI2896	0	0	7	0	0	0	2	0	0	0	0	6	0	0	0	2	0	0	Archaea;Thaumarchaeota;Nitrososphaeria;Nitrosopumilales;Nitrosopumilaceae;uncultured_Nitrosopumilales_archaeon	EF069384.1.1439	99.282	0
UNI3315	0	0	0	0	13	0	0	0	0	0	0	0	0	0	0	1	0	0	Archaea;Thaumarchaeota;Nitrososphaeria;Nitrosopumilales;Nitrosopumilaceae;uncultured_Nitrosopumilales_archaeon	EF069354.1.1439	99.282	0
UNI313	21	49	5	0	33	24	1	2	0	0	0	2	0	0	0	0	1	0	Archaea;Thaumarchaeota;Nitrososphaeria;Nitrosopumilales;Nitrosopumilaceae;uncultured_sediment_archaeon	FN553874.1.1342	99.522	0
UNI1469	5	4	3	0	1	5	9	11	0	0	0	3	0	0	0	6	16	0	Archaea;Thaumarchaeota;Nitrososphaeria;Nitrosopumilales;Nitrosopumilaceae;uncultured_sediment_archaeon	FN553859.1.1342	99.282	0
UNI789	13	25	4	0	13	13	3	1	0	0	0	1	0	0	0	0	0	0	Archaea;Thaumarchaeota;Nitrososphaeria;Nitrosopumilales;Nitrosopumilaceae;uncultured_sediment_archaeon	FN553874.1.1342	99.282	0
UNI3466	12	26	5	6	0	0	0	11	0	0	0	0	10	0	0	0	2	0	Archaea;Thaumarchaeota;Nitrososphaeria;Nitrosopumilales;Nitrosopumilaceae;uncultured_sediment_archaeon	FN553847.1.1342	99.043	0
UNI394	16	32	7	0	48	11	0	2	0	0	0	0	0	2	0	0	1	0	Archaea;Thaumarchaeota;Nitrososphaeria;Nitrosopumilales;Nitrosopumilaceae;uncultured_sediment_archaeon	FN553874.1.1342	99.522	0
UNI356	11	53	6	0	38	28	2	0	0	0	0	4	0	0	0	0	2	0	Archaea;Thaumarchaeota;Nitrososphaeria;Nitrosopumilales;Nitrosopumilaceae;uncultured_sediment_archaeon	FN553874.1.1342	99.282	0
UNI991	5	7	10	4	0	1	17	7	0	0	0	2	0	0	0	9	9	0	Archaea;Thaumarchaeota;Nitrososphaeria;Nitrosopumilales;Nitrosopumilaceae;uncultured_sediment_archaeon	FN553874.1.1342	99.282	0
UNI1264	6	18	1	2	3	25	0	1	0	0	0	0	0	0	0	0	0	0	Archaea;Thaumarchaeota;Nitrososphaeria;Nitrosopumilales;Nitrosopumilaceae;uncultured_sediment_archaeon	FN553859.1.1342	100	0
UNI1711	3	3	10	3	0	0	7	4	0	0	0	2	0	0	0	2	4	0	Archaea;Thaumarchaeota;Nitrososphaeria;Nitrosopumilales;Nitrosopumilaceae;uncultured_sediment_archaeon	FN553874.1.1342	99.522	0
UNI3045	4	7	0	0	0	17	0	1	0	0	0	0	0	0	0	0	0	0	Archaea;Thaumarchaeota;Nitrososphaeria;Nitrosopumilales;Nitrosopumilaceae;uncultured_sediment_archaeon	FN553859.1.1342	99.522	0
UNI624	4	8	20	3	0	1	18	14	0	0	0	7	0	0	0	5	5	0	Archaea;Thaumarchaeota;Nitrososphaeria;Nitrosopumilales;Nitrosopumilaceae;uncultured_sediment_archaeon	FN553874.1.1342	99.282	0
UNI1601	6	17	0	0	9	12	0	1	0	0	0	0	0	0	0	0	0	0	Archaea;Thaumarchaeota;Nitrososphaeria;Nitrosopumilales;Nitrosopumilaceae;uncultured_sediment_archaeon	FN553874.1.1342	99.522	0
UNI654	8	31	7	0	32	21	0	1	0	0	0	0	0	2	0	2	4	0	Archaea;Thaumarchaeota;Nitrososphaeria;Nitrosopumilales;Nitrosopumilaceae;uncultured_sediment_archaeon	FN553874.1.1342	99.761	0
UNI917	5	18	1	0	7	27	0	0	0	0	0	0	0	0	0	0	0	0	Archaea;Thaumarchaeota;Nitrososphaeria;Nitrosopumilales;Nitrosopumilaceae;uncultured_sediment_archaeon	FN553859.1.1342	99.761	0
UNI2469	5	8	0	0	1	15	0	0	0	0	0	0	0	0	0	0	0	0	Archaea;Thaumarchaeota;Nitrososphaeria;Nitrosopumilales;Nitrosopumilaceae;uncultured_sediment_archaeon	FN553859.1.1342	99.522	0
UNI3267	4	5	2	0	0	13	0	2	0	0	0	0	0	0	0	0	0	0	Archaea;Thaumarchaeota;Nitrososphaeria;Nitrosopumilales;Nitrosopumilaceae;uncultured_sediment_archaeon	FN553859.1.1342	99.282	0
UNI682	2	0	7	0	2	4	12	16	0	0	0	1	0	0	0	14	19	1	Archaea;Thaumarchaeota;Nitrososphaeria;Nitrosopumilales;Nitrosopumilaceae;uncultured_sediment_archaeon	FN553859.1.1342	99.282	0
UNI1250	7	2	8	0	0	1	10	6	0	0	0	2	0	0	0	0	7	0	Archaea;Thaumarchaeota;Nitrososphaeria;Nitrosopumilales;Nitrosopumilaceae;uncultured_sediment_archaeon	FN553874.1.1342	99.043	0
UNI1714	3	8	0	1	3	7	0	0	0	0	0	0	0	0	0	0	0	0	Archaea;Thaumarchaeota;Nitrososphaeria;Nitrosopumilales;Nitrosopumilaceae;uncultured_sediment_archaeon	FN553859.1.1342	99.761	0
UNI642	6	6	15	1	0	1	12	10	0	0	0	3	2	0	0	12	20	0	Archaea;Thaumarchaeota;Nitrososphaeria;Nitrosopumilales;Nitrosopumilaceae;uncultured_sediment_archaeon	FN553874.1.1342	99.043	0
UNI677	5	24	0	0	2	39	0	0	0	0	0	0	0	0	0	0	0	0	Archaea;Thaumarchaeota;Nitrososphaeria;Nitrosopumilales;Nitrosopumilaceae;uncultured_sediment_archaeon	FN553859.1.1342	99.522	0
UNI2279	0	8	0	1	2	22	0	2	0	0	0	0	0	0	0	0	0	0	Archaea;Thaumarchaeota;Nitrososphaeria;Nitrosopumilales;Nitrosopumilaceae;uncultured_sediment_archaeon	FN553859.1.1342	99.761	0
UNI3063	0	7	0	0	34	2	1	1	0	0	0	0	0	0	0	0	0	0	Archaea;Thaumarchaeota;Nitrososphaeria;Nitrosopumilales;Nitrosopumilaceae;uncultured_sediment_archaeon	FN553874.1.1342	99.043	0
UNI2806	0	0	2	0	3	4	0	0	0	0	0	3	0	0	0	0	0	0	Archaea;Thaumarchaeota;Nitrososphaeria;Nitrosopumilales;Nitrosopumilaceae;uncultured_sediment_archaeon	FN553859.1.1342	99.282	0
UNI457	0	0	7	0	0	2	17	22	0	0	0	0	0	0	0	26	34	0	Archaea;Thaumarchaeota;Nitrososphaeria;Nitrosopumilales;Nitrosopumilaceae;uncultured_sediment_archaeon	FN553859.1.1342	99.043	0
UNI1359	0	0	3	0	0	3	9	7	0	0	0	1	0	0	0	3	14	0	Archaea;Thaumarchaeota;Nitrososphaeria;Nitrosopumilales;Nitrosopumilaceae;uncultured_sediment_archaeon	FN553859.1.1342	99.522	0
UNI3212	0	0	0	0	0	0	4	6	0	0	0	0	0	0	0	2	1	0	Archaea;Thaumarchaeota;Nitrososphaeria;Nitrosopumilales;Nitrosopumilaceae;uncultured_sediment_archaeon	FN553859.1.1342	99.282	0
UNI1464	12	17	0	0	2	1	0	0	0	0	0	1	0	0	0	0	0	0	Archaea;Thaumarchaeota;Nitrososphaeria;Nitrosopumilales;Nitrosopumilaceae;uncultured_thaumarchaeote	JF422933.1.1077	99.282	0
UNI2016	13	12	1	0	2	2	0	0	0	0	0	0	0	0	0	0	0	0	Archaea;Thaumarchaeota;Nitrososphaeria;Nitrosopumilales;Nitrosopumilaceae;uncultured_thaumarchaeote	JF422933.1.1077	99.043	0
UNI2369	0	0	0	0	0	0	0	0	0	6	17	5	7	0	0	3	2	0	Archaea;Thaumarchaeota;Nitrososphaeria;Nitrososphaerales;Nitrososphaeraceae;uncultured_archaeon	GQ926279.1.905	99.522	0
UNI2803	3	5	0	0	45	18	0	0	0	0	0	0	0	2	0	0	0	0	Archaea;Thaumarchaeota;Nitrososphaeria;uncultured;uncultured_crenarchaeote	DQ417488.1.1042	99.043	0
