# Supplementary material for: Primary Production in the Water Column as Major Structuring Element of the Biogeographical Distribution and Function of Archaea in Deep-Sea Sediments of the Central Pacific Ocean
Source: Archaea. 2019 Mar 3;2019:3717239. doi: 10.1155/2019/3717239 (PMC6421829; doi:10.1155/2019/3717239)
Supplement: Supplementary 5 — Table S4: functional predictions made with Tax4Fun2. [file 3717239.f5.xlsx]

## Sheet: functional_prediction
Table S4 Functional predictions made with Tax4Fun2.
KO	Entire Community									Active community									description
	St02	St04	St06	St08	St10	St12	St14	St16	St19	St02	St04	St06	St08	St10	St12	St14	St16	St19
K00001	0.000827957	0.000839551	0.000849524	0.000820719	0.00084148	0.00085228	0.000851776	0.000850775	0.000807033	0.000854701	0.000781235	0.000852792	0.000834914	0.000894386	0.000780624	0.00085283	0.000852089	0.000819433	alcohol dehydrogenase [EC:1.1.1.1]
K00003	0.000827957	0.000839839	0.0008503	0.000820719	0.00084148	0.00085228	0.000852347	0.000852023	0.000857732	0.000854701	0.000787536	0.000849031	0.000836048	0.000306647	0.000479331	0.000853549	0.000851603	0.000856797	homoserine dehydrogenase [EC:1.1.1.3]
K00008	0.000827957	0.000839839	0.0008503	0.000820719	0.00084148	0.00085228	0.000852347	0.000852023	0.000857732	0.000854701	0.000787536	0.000849031	0.000836048	0.000306647	0.000479331	0.000853549	0.000851603	0.000856797	L-iditol 2-dehydrogenase [EC:1.1.1.14]
K00012	0	2.88307e-07	7.75939e-07	0	0	0	5.71182e-07	1.2482e-06	5.06989e-05	0	0.000144907	3.76115e-06	1.13439e-06	0.000587739	0.000534111	7.18677e-07	4.8663e-07	3.73639e-05	UDPglucose 6-dehydrogenase [EC:1.1.1.22]
K00013	0.000827957	0.000839839	0.0008503	0.000820719	0.00084148	0.00085228	0.000852347	0.000852023	0.000857732	0.000854701	0.000787536	0.000849031	0.000836048	0.000306647	0.000479331	0.000853549	0.000851603	0.000856797	histidinol dehydrogenase [EC:1.1.1.23]
K00014	0.000827957	0.000839839	0.0008503	0.000820719	0.00084148	0.00085228	0.000852347	0.000852023	0.000857732	0.000854701	0.000787536	0.000849031	0.000836048	0.000306647	0.000479331	0.000853549	0.000851603	0.000856797	shikimate dehydrogenase [EC:1.1.1.25]
K00015	0.00142584	0.00155124	0.00166116	0.00134909	0.00156922	0.00168374	0.00168327	0.00167846	0.00163791	0.0017094	0.00139866	0.00167945	0.00150931	0.000613293	0.000842252	0.00169572	0.00168046	0.00165525	glyoxylate reductase [EC:1.1.1.26]
K00016	0.000460145	0.000256594	7.81112e-05	0.000584693	0.000227478	4.16472e-05	4.22675e-05	4.99281e-05	0.000104416	0	0.000346516	4.09768e-05	0.000324437	0.000587739	0.000534111	2.20394e-05	4.59865e-05	7.93305e-05	L-lactate dehydrogenase [EC:1.1.1.27]
K00018	0.000230072	0.000128153	3.86676e-05	0.000292347	0.000113739	2.08236e-05	2.08482e-05	2.434e-05	2.68584e-05	0	0.000100805	1.86078e-05	0.000161651	0	0	1.06604e-05	2.275e-05	2.09833e-05	glycerate dehydrogenase [EC:1.1.1.29]
K00019	0	0	0	0	0	0	0	0	0	0	6.93031e-05	3.76115e-06	0	0.000587739	0.000417702	0	4.8663e-07	0	3-hydroxybutyrate dehydrogenase [EC:1.1.1.30]
K00020	0.000827957	0.000839839	0.0008503	0.000820719	0.00084148	0.00085228	0.000852347	0.000852023	0.000857732	0.000854701	0.000787536	0.000849031	0.000836048	0.000306647	0.000479331	0.000853549	0.000851603	0.000856797	3-hydroxyisobutyrate dehydrogenase [EC:1.1.1.31]
K00024	0.00165591	0.00167939	0.00169982	0.00164144	0.00168296	0.00170456	0.00170412	0.0017028	0.00166477	0.0017094	0.00156877	0.00170182	0.00167096	0.00120103	0.00125995	0.00170638	0.00170369	0.00167623	malate dehydrogenase [EC:1.1.1.37]
K00027	0.000230072	0.000128153	3.86676e-05	0.000292347	0.000113739	2.08236e-05	2.08482e-05	2.434e-05	2.68584e-05	0	0.000170108	2.2369e-05	0.000161651	0.000587739	0.000417702	1.06604e-05	2.32366e-05	2.09833e-05	malate dehydrogenase (oxaloacetate-decarboxylating) [EC:1.1.1.38]
K00029	0	0	0	0	0	0	0	0	0	0	6.93031e-05	3.76115e-06	0	0.000587739	0.000417702	0	4.8663e-07	0	malate dehydrogenase (oxaloacetate-decarboxylating)(NADP+) [EC:1.1.1.40]
K00030	0.00142584	0.00155153	0.00166193	0.00134909	0.00156922	0.00168374	0.00168385	0.00167971	0.00168861	0.0017094	0.00154357	0.00168321	0.00151045	0.00120103	0.00137636	0.00169644	0.00168094	0.00169261	isocitrate dehydrogenase (NAD+) [EC:1.1.1.41]
K00031	0.00165591	0.00167939	0.00169982	0.00164144	0.00168296	0.00170456	0.00170412	0.0017028	0.00166477	0.0017094	0.00163807	0.00170558	0.00167096	0.00178877	0.00167766	0.00170638	0.00170418	0.00167623	isocitrate dehydrogenase [EC:1.1.1.42]
K00038	0.000597885	0.000711399	0.000810857	0.000528372	0.000727741	0.000831457	0.000830927	0.000826435	0.000780175	0.000854701	0.000611128	0.000830423	0.000673263	0.000306647	0.000362922	0.00084217	0.000828853	0.000798449	3alpha(or 20beta)-hydroxysteroid dehydrogenase [EC:1.1.1.53]
K00046	0.000597885	0.000711399	0.000810857	0.000528372	0.000727741	0.000831457	0.000830927	0.000826435	0.000780175	0.000854701	0.000611128	0.000830423	0.000673263	0.000306647	0.000362922	0.00084217	0.000828853	0.000798449	gluconate 5-dehydrogenase [EC:1.1.1.69]
K00052	0.00142584	0.00155153	0.00166193	0.00134909	0.00156922	0.00168374	0.00168385	0.00167971	0.00168861	0.0017094	0.00154357	0.00168321	0.00151045	0.00120103	0.00137636	0.00169644	0.00168094	0.00169261	3-isopropylmalate dehydrogenase [EC:1.1.1.85]
K00053	0.000827957	0.000839839	0.0008503	0.000820719	0.00084148	0.00085228	0.000852347	0.000852023	0.000857732	0.000854701	0.000787536	0.000849031	0.000836048	0.000306647	0.000479331	0.000853549	0.000851603	0.000856797	ketol-acid reductoisomerase [EC:1.1.1.86]
K00054	0.000827957	0.000839839	0.0008503	0.000820719	0.00084148	0.00085228	0.000852347	0.000852023	0.000857732	0.000854701	0.000856839	0.000852792	0.000836048	0.000894386	0.000897033	0.000853549	0.000852089	0.000856797	hydroxymethylglutaryl-CoA reductase [EC:1.1.1.88]
K00055	0	2.88307e-07	7.75939e-07	0	0	0	5.71182e-07	1.2482e-06	5.06989e-05	0	7.56034e-05	0	1.13439e-06	0	0.000116409	7.18677e-07	0	3.73639e-05	aryl-alcohol dehydrogenase [EC:1.1.1.90]
K00057	0	0	0	0	0	0	0	0	0	0	6.93031e-05	3.76115e-06	0	0.000587739	0.000417702	0	4.8663e-07	0	glycerol-3-phosphate dehydrogenase (NAD(P)+) [EC:1.1.1.94]
K00058	0.00165591	0.00167968	0.0017006	0.00164144	0.00168296	0.00170456	0.00170469	0.00170405	0.00171546	0.0017094	0.00164437	0.00170182	0.0016721	0.00120103	0.00137636	0.0017071	0.00170369	0.00171359	D-3-phosphoglycerate dehydrogenase / 2-oxoglutarate reductase [EC:1.1.1.95 1.1.1.399]
K00059	0.00496774	0.00503846	0.00510025	0.00492431	0.00504888	0.00511368	0.00511294	0.00510964	0.00504499	0.00512821	0.00492052	0.00511299	0.00501402	0.00477858	0.00473168	0.00511986	0.00511205	0.00506605	3-oxoacyl-[acyl-carrier protein] reductase [EC:1.1.1.100]
K00060	0	0	0	0	0	0	0	0	0	0	6.93031e-05	3.76115e-06	0	0.000587739	0.000417702	0	4.8663e-07	0	threonine 3-dehydrogenase [EC:1.1.1.103]
K00065	0.000460145	0.000256305	7.73353e-05	0.000584693	0.000227478	4.16472e-05	4.16963e-05	4.86799e-05	5.37167e-05	0	0.000201609	3.72156e-05	0.000323302	0	0	2.13208e-05	4.54999e-05	4.19666e-05	2-dehydro-3-deoxy-D-gluconate 5-dehydrogenase [EC:1.1.1.127]
K00067	0.000827957	0.000839551	0.000849524	0.000820719	0.00084148	0.00085228	0.000851776	0.000850775	0.000807033	0.000854701	0.000711932	0.000849031	0.000834914	0.000306647	0.000362922	0.00085283	0.000851603	0.000819433	dTDP-4-dehydrorhamnose reductase [EC:1.1.1.133]
K00074	0.000827957	0.000839839	0.0008503	0.000820719	0.00084148	0.00085228	0.000852347	0.000852023	0.000857732	0.000854701	0.00106475	0.000864075	0.000836048	0.0026576	0.00215014	0.000853549	0.000853549	0.000856797	3-hydroxybutyryl-CoA dehydrogenase [EC:1.1.1.157]
K00077	0	0	0	0	0	0	0	0	0	0	6.93031e-05	3.76115e-06	0	0.000587739	0.000417702	0	4.8663e-07	0	2-dehydropantoate 2-reductase [EC:1.1.1.169]
K00082	0	0	0	0	0	0	0	0	0	0	6.93031e-05	3.76115e-06	0	0.000587739	0.000417702	0	4.8663e-07	0	5-amino-6-(5-phosphoribosylamino)uracil reductase [EC:1.1.1.193]
K00088	0.00105803	0.000967992	0.000888968	0.00111307	0.000955219	0.000873104	0.000873195	0.000876363	0.00088459	0.000854701	0.00088834	0.000867639	0.000997699	0.000306647	0.000479331	0.000864209	0.000874353	0.00087778	IMP dehydrogenase [EC:1.1.1.205]
K00090	0.000230072	0.000128441	3.94436e-05	0.000292347	0.000113739	2.08236e-05	2.14193e-05	2.55882e-05	7.75573e-05	0	0.000176408	1.86078e-05	0.000162786	0	0.000116409	1.13791e-05	2.275e-05	5.83472e-05	gluconate 2-dehydrogenase [EC:1.1.1.215]
K00091	0.000827957	0.000839551	0.000849524	0.000820719	0.00084148	0.00085228	0.000851776	0.000850775	0.000807033	0.000854701	0.000850538	0.000856553	0.000834914	0.00148213	0.00119833	0.00085283	0.000852576	0.000819433	dihydroflavonol-4-reductase [EC:1.1.1.219]
K00096	0.000827957	0.000839839	0.0008503	0.000820719	0.00084148	0.00085228	0.000852347	0.000852023	0.000857732	0.000854701	0.000787536	0.000849031	0.000836048	0.000306647	0.000479331	0.000853549	0.000851603	0.000856797	glycerol-1-phosphate dehydrogenase [NAD(P)+] [EC:1.1.1.261]
K00102	0.000827957	0.000839551	0.000849524	0.000820719	0.00084148	0.00085228	0.000851776	0.000850775	0.000807033	0.000854701	0.000711932	0.000849031	0.000834914	0.000306647	0.000362922	0.00085283	0.000851603	0.000819433	D-lactate dehydrogenase (cytochrome) [EC:1.1.2.4]
K00104	0.000827957	0.000839551	0.000849524	0.000820719	0.00084148	0.00085228	0.000851776	0.000850775	0.000807033	0.000854701	0.000711932	0.000849031	0.000834914	0.000306647	0.000362922	0.00085283	0.000851603	0.000819433	glycolate oxidase [EC:1.1.3.15]
K00111	0	0	0	0	0	0	0	0	0	0	6.93031e-05	3.76115e-06	0	0.000587739	0.000417702	0	4.8663e-07	0	glycerol-3-phosphate dehydrogenase [EC:1.1.5.3]
K00121	0	2.88307e-07	7.75939e-07	0	0	0	5.71182e-07	1.2482e-06	5.06989e-05	0	7.56034e-05	0	1.13439e-06	0	0.000116409	7.18677e-07	0	3.73639e-05	S-(hydroxymethyl)glutathione dehydrogenase / alcohol dehydrogenase [EC:1.1.1.284 1.1.1.1]
K00122	0.000230072	0.000128153	3.86676e-05	0.000292347	0.000113739	2.08236e-05	2.08482e-05	2.434e-05	2.68584e-05	0	0.000100805	1.86078e-05	0.000161651	0	0	1.06604e-05	2.275e-05	2.09833e-05	formate dehydrogenase [EC:1.2.1.2]
K00123	0	0	0	0	0	0	0	0	0	0	6.93031e-05	3.76115e-06	0	0.000587739	0.000417702	0	4.8663e-07	0	formate dehydrogenase major subunit [EC:1.2.1.2]
K00128	0.00105803	0.000967704	0.000888192	0.00111307	0.000955219	0.000873104	0.000872624	0.000875115	0.000833891	0.000854701	0.00102065	0.000878922	0.000996565	0.00206986	0.00161603	0.000863491	0.000875812	0.000840416	aldehyde dehydrogenase (NAD+) [EC:1.2.1.3]
K00130	0	0	0	0	0	0	0	0	0	0	6.93031e-05	3.76115e-06	0	0.000587739	0.000417702	0	4.8663e-07	0	betaine-aldehyde dehydrogenase [EC:1.2.1.8]
K00131	0	0	0	0	0	0	0	0	0	0	6.93031e-05	3.76115e-06	0	0.000587739	0.000417702	0	4.8663e-07	0	glyceraldehyde-3-phosphate dehydrogenase (NADP+) [EC:1.2.1.9]
K00133	0.000827957	0.000839839	0.0008503	0.000820719	0.00084148	0.00085228	0.000852347	0.000852023	0.000857732	0.000854701	0.000856839	0.000852792	0.000836048	0.000894386	0.000897033	0.000853549	0.000852089	0.000856797	aspartate-semialdehyde dehydrogenase [EC:1.2.1.11]
K00135	0.000827957	0.000839551	0.000849524	0.000820719	0.00084148	0.00085228	0.000851776	0.000850775	0.000807033	0.000854701	0.000989145	0.000864075	0.000834914	0.0026576	0.00203373	0.00085283	0.000853549	0.000819433	succinate-semialdehyde dehydrogenase / glutarate-semialdehyde dehydrogenase [EC:1.2.1.16 1.2.1.79 1.2.1.20]
K00138	0.000597885	0.000711399	0.000810857	0.000528372	0.000727741	0.000831457	0.000830927	0.000826435	0.000780175	0.000854701	0.000680431	0.000834184	0.000673263	0.000894386	0.000780624	0.00084217	0.000829339	0.000798449	aldehyde dehydrogenase [EC:1.2.1.-]
K00140	0	0	0	0	0	0	0	0	0	0	6.93031e-05	3.76115e-06	0	0.000587739	0.000417702	0	4.8663e-07	0	malonate-semialdehyde dehydrogenase (acetylating) / methylmalonate-semialdehyde dehydrogenase [EC:1.2.1.18 1.2.1.27]
K00141	0.000230072	0.000128153	3.86676e-05	0.000292347	0.000113739	2.08236e-05	2.08482e-05	2.434e-05	2.68584e-05	0	0.000100805	1.86078e-05	0.000161651	0	0	1.06604e-05	2.275e-05	2.09833e-05	benzaldehyde dehydrogenase (NAD) [EC:1.2.1.28]
K00145	0.000827957	0.000839839	0.0008503	0.000820719	0.00084148	0.00085228	0.000852347	0.000852023	0.000857732	0.000854701	0.000787536	0.000849031	0.000836048	0.000306647	0.000479331	0.000853549	0.000851603	0.000856797	N-acetyl-gamma-glutamyl-phosphate reductase [EC:1.2.1.38]
K00146	0.000827957	0.000839551	0.000849524	0.000820719	0.00084148	0.00085228	0.000851776	0.000850775	0.000807033	0.000854701	0.000919841	0.000860314	0.000834914	0.00206986	0.00161603	0.00085283	0.000853063	0.000819433	phenylacetaldehyde dehydrogenase [EC:1.2.1.39]
K00150	0.000827957	0.000839839	0.0008503	0.000820719	0.00084148	0.00085228	0.000852347	0.000852023	0.000857732	0.000854701	0.000856839	0.000852792	0.000836048	0.000894386	0.000897033	0.000853549	0.000852089	0.000856797	glyceraldehyde-3-phosphate dehydrogenase (NAD(P)) [EC:1.2.1.59]
K00151	0	0	0	0	0	0	0	0	0	0	0.000138606	7.52231e-06	0	0.00117548	0.000835405	0	9.7326e-07	0	5-carboxymethyl-2-hydroxymuconic-semialdehyde dehydrogenase [EC:1.2.1.60]
K00154	0.000597885	0.000711399	0.000810857	0.000528372	0.000727741	0.000831457	0.000830927	0.000826435	0.000780175	0.000854701	0.000680431	0.000834184	0.000673263	0.000894386	0.000780624	0.00084217	0.000829339	0.000798449	coniferyl-aldehyde dehydrogenase [EC:1.2.1.68]
K00161	0	0	0	0	0	0	0	0	0	0	6.93031e-05	3.76115e-06	0	0.000587739	0.000417702	0	4.8663e-07	0	pyruvate dehydrogenase E1 component alpha subunit [EC:1.2.4.1]
K00162	0	0	0	0	0	0	0	0	0	0	0.000207909	1.12835e-05	0	0.00176322	0.00125311	0	1.45989e-06	0	pyruvate dehydrogenase E1 component beta subunit [EC:1.2.4.1]
K00163	0	0	0	0	0	0	0	0	0	0	6.93031e-05	3.76115e-06	0	0.000587739	0.000417702	0	4.8663e-07	0	pyruvate dehydrogenase E1 component [EC:1.2.4.1]
K00166	0	0	0	0	0	0	0	0	0	0	6.93031e-05	3.76115e-06	0	0.000587739	0.000417702	0	4.8663e-07	0	2-oxoisovalerate dehydrogenase E1 component alpha subunit [EC:1.2.4.4]
K00167	0	0	0	0	0	0	0	0	0	0	0.000138606	7.52231e-06	0	0.00117548	0.000835405	0	9.7326e-07	0	2-oxoisovalerate dehydrogenase E1 component beta subunit [EC:1.2.4.4]
K00174	0.000827957	0.000839839	0.0008503	0.000820719	0.00084148	0.00085228	0.000852347	0.000852023	0.000857732	0.000854701	0.000856839	0.000852792	0.000836048	0.000894386	0.000897033	0.000853549	0.000852089	0.000856797	2-oxoglutarate/2-oxoacid ferredoxin oxidoreductase subunit alpha [EC:1.2.7.3 1.2.7.11]
K00175	0.000827957	0.000839839	0.0008503	0.000820719	0.00084148	0.00085228	0.000852347	0.000852023	0.000857732	0.000854701	0.000856839	0.000852792	0.000836048	0.000894386	0.000897033	0.000853549	0.000852089	0.000856797	2-oxoglutarate/2-oxoacid ferredoxin oxidoreductase subunit beta [EC:1.2.7.3 1.2.7.11]
K00208	0	0	0	0	0	0	0	0	0	0	6.93031e-05	3.76115e-06	0	0.000587739	0.000417702	0	4.8663e-07	0	enoyl-[acyl-carrier protein] reductase I [EC:1.3.1.9 1.3.1.10]
K00218	0	0	0	0	0	0	0	0	0	0	6.93031e-05	3.76115e-06	0	0.000587739	0.000417702	0	4.8663e-07	0	protochlorophyllide reductase [EC:1.3.1.33]
K00219	0	0	0	0	0	0	0	0	0	0	0.000138606	7.52231e-06	0	0.00117548	0.000835405	0	9.7326e-07	0	2,4-dienoyl-CoA reductase (NADPH2) [EC:1.3.1.34]
K00239	0.000827957	0.000839839	0.0008503	0.000820719	0.00084148	0.00085228	0.000852347	0.000852023	0.000857732	0.000854701	0.000856839	0.000852792	0.000836048	0.000894386	0.000897033	0.000853549	0.000852089	0.000856797	succinate dehydrogenase / fumarate reductase, flavoprotein subunit [EC:1.3.5.1 1.3.5.4]
K00240	0.000827957	0.000839839	0.0008503	0.000820719	0.00084148	0.00085228	0.000852347	0.000852023	0.000857732	0.000854701	0.000856839	0.000852792	0.000836048	0.000894386	0.000897033	0.000853549	0.000852089	0.000856797	succinate dehydrogenase / fumarate reductase, iron-sulfur subunit [EC:1.3.5.1 1.3.5.4]
K00241	0.000827957	0.000839839	0.0008503	0.000820719	0.00084148	0.00085228	0.000852347	0.000852023	0.000857732	0.000854701	0.000787536	0.000849031	0.000836048	0.000306647	0.000479331	0.000853549	0.000851603	0.000856797	succinate dehydrogenase / fumarate reductase, cytochrome b subunit
K00242	0.000827957	0.000839839	0.0008503	0.000820719	0.00084148	0.00085228	0.000852347	0.000852023	0.000857732	0.000854701	0.000787536	0.000849031	0.000836048	0.000306647	0.000479331	0.000853549	0.000851603	0.000856797	succinate dehydrogenase / fumarate reductase, membrane anchor subunit
K00244	0.000597885	0.000711399	0.000810857	0.000528372	0.000727741	0.000831457	0.000830927	0.000826435	0.000780175	0.000854701	0.000611128	0.000830423	0.000673263	0.000306647	0.000362922	0.00084217	0.000828853	0.000798449	fumarate reductase flavoprotein subunit [EC:1.3.5.4]
K00248	0	0	0	0	0	0	0	0	0	0	0.000138606	7.52231e-06	0	0.00117548	0.000835405	0	9.7326e-07	0	butyryl-CoA dehydrogenase [EC:1.3.8.1]
K00249	0	0	0	0	0	0	0	0	0	0	0.000207909	1.12835e-05	0	0.00176322	0.00125311	0	1.45989e-06	0	acyl-CoA dehydrogenase [EC:1.3.8.7]
K00252	0	0	0	0	0	0	0	0	0	0	0.000207909	1.12835e-05	0	0.00176322	0.00125311	0	1.45989e-06	0	glutaryl-CoA dehydrogenase [EC:1.3.8.6]
K00253	0	0	0	0	0	0	0	0	0	0	0.000207909	1.12835e-05	0	0.00176322	0.00125311	0	1.45989e-06	0	isovaleryl-CoA dehydrogenase [EC:1.3.8.4]
K00254	0	0	0	0	0	0	0	0	0	0	6.93031e-05	3.76115e-06	0	0.000587739	0.000417702	0	4.8663e-07	0	dihydroorotate dehydrogenase [EC:1.3.5.2]
K00259	0	0	0	0	0	0	0	0	0	0	6.93031e-05	3.76115e-06	0	0.000587739	0.000417702	0	4.8663e-07	0	alanine dehydrogenase [EC:1.4.1.1]
K00260	0.000827957	0.000839839	0.0008503	0.000820719	0.00084148	0.00085228	0.000852347	0.000852023	0.000857732	0.000854701	0.000787536	0.000849031	0.000836048	0.000306647	0.000479331	0.000853549	0.000851603	0.000856797	glutamate dehydrogenase [EC:1.4.1.2]
K00261	0.000827957	0.000839839	0.0008503	0.000820719	0.00084148	0.00085228	0.000852347	0.000852023	0.000857732	0.000854701	0.000787536	0.000849031	0.000836048	0.000306647	0.000479331	0.000853549	0.000851603	0.000856797	glutamate dehydrogenase (NAD(P)+) [EC:1.4.1.3]
K00262	0.000827957	0.000839551	0.000849524	0.000820719	0.00084148	0.00085228	0.000851776	0.000850775	0.000807033	0.000854701	0.000781235	0.000852792	0.000834914	0.000894386	0.000780624	0.00085283	0.000852089	0.000819433	glutamate dehydrogenase (NADP+) [EC:1.4.1.4]
K00278	0.000597885	0.000711399	0.000810857	0.000528372	0.000727741	0.000831457	0.000830927	0.000826435	0.000780175	0.000854701	0.000749734	0.000837945	0.000673263	0.00148213	0.00119833	0.00084217	0.000829826	0.000798449	L-aspartate oxidase [EC:1.4.3.16]
K00281	0	0	0	0	0	0	0	0	0	0	6.93031e-05	3.76115e-06	0	0.000587739	0.000417702	0	4.8663e-07	0	glycine dehydrogenase [EC:1.4.4.2]
K00282	0	0	0	0	0	0	0	0	0	0	6.93031e-05	3.76115e-06	0	0.000587739	0.000417702	0	4.8663e-07	0	glycine dehydrogenase subunit 1 [EC:1.4.4.2]
K00283	0	0	0	0	0	0	0	0	0	0	6.93031e-05	3.76115e-06	0	0.000587739	0.000417702	0	4.8663e-07	0	glycine dehydrogenase subunit 2 [EC:1.4.4.2]
K00287	0	0	0	0	0	0	0	0	0	0	6.93031e-05	3.76115e-06	0	0.000587739	0.000417702	0	4.8663e-07	0	dihydrofolate reductase [EC:1.5.1.3]
K00294	0.000230072	0.000128153	3.86676e-05	0.000292347	0.000113739	2.08236e-05	2.08482e-05	2.434e-05	2.68584e-05	0	0.000170108	2.2369e-05	0.000161651	0.000587739	0.000417702	1.06604e-05	2.32366e-05	2.09833e-05	1-pyrroline-5-carboxylate dehydrogenase [EC:1.2.1.88]
K00299	0.000827957	0.000839839	0.0008503	0.000820719	0.00084148	0.00085228	0.000852347	0.000852023	0.000857732	0.000854701	0.000787536	0.000849031	0.000836048	0.000306647	0.000479331	0.000853549	0.000851603	0.000856797	FMN reductase [EC:1.5.1.38]
K00313	0	0	0	0	0	0	0	0	0	0	6.93031e-05	3.76115e-06	0	0.000587739	0.000417702	0	4.8663e-07	0	electron transfer flavoprotein-quinone oxidoreductase [EC:1.5.5.-]
K00318	0.000230072	0.000128153	3.86676e-05	0.000292347	0.000113739	2.08236e-05	2.08482e-05	2.434e-05	2.68584e-05	0	0.000170108	2.2369e-05	0.000161651	0.000587739	0.000417702	1.06604e-05	2.32366e-05	2.09833e-05	proline dehydrogenase [EC:1.5.-.-]
K00324	0	0	0	0	0	0	0	0	0	0	0.000138606	7.52231e-06	0	0.00117548	0.000835405	0	9.7326e-07	0	NAD(P) transhydrogenase subunit alpha [EC:1.6.1.2]
K00325	0	0	0	0	0	0	0	0	0	0	6.93031e-05	3.76115e-06	0	0.000587739	0.000417702	0	4.8663e-07	0	NAD(P) transhydrogenase subunit beta [EC:1.6.1.2]
K00329	0.000827957	0.000839839	0.0008503	0.000820719	0.00084148	0.00085228	0.000852347	0.000852023	0.000857732	0.000854701	0.000787536	0.000849031	0.000836048	0.000306647	0.000479331	0.000853549	0.000851603	0.000856797	NADH dehydrogenase [EC:1.6.5.3]
K00330	0.000827957	0.000839839	0.0008503	0.000820719	0.00084148	0.00085228	0.000852347	0.000852023	0.000857732	0.000854701	0.000856839	0.000852792	0.000836048	0.000894386	0.000897033	0.000853549	0.000852089	0.000856797	NADH-quinone oxidoreductase subunit A [EC:1.6.5.3]
K00331	0.000827957	0.000839839	0.0008503	0.000820719	0.00084148	0.00085228	0.000852347	0.000852023	0.000857732	0.000854701	0.000856839	0.000852792	0.000836048	0.000894386	0.000897033	0.000853549	0.000852089	0.000856797	NADH-quinone oxidoreductase subunit B [EC:1.6.5.3]
K00332	0.000827957	0.000839839	0.0008503	0.000820719	0.00084148	0.00085228	0.000852347	0.000852023	0.000857732	0.000854701	0.000787536	0.000849031	0.000836048	0.000306647	0.000479331	0.000853549	0.000851603	0.000856797	NADH-quinone oxidoreductase subunit C [EC:1.6.5.3]
K00333	0.000827957	0.000839839	0.0008503	0.000820719	0.00084148	0.00085228	0.000852347	0.000852023	0.000857732	0.000854701	0.000856839	0.000852792	0.000836048	0.000894386	0.000897033	0.000853549	0.000852089	0.000856797	NADH-quinone oxidoreductase subunit D [EC:1.6.5.3]
K00337	0.000827957	0.000839839	0.0008503	0.000820719	0.00084148	0.00085228	0.000852347	0.000852023	0.000857732	0.000854701	0.000856839	0.000852792	0.000836048	0.000894386	0.000897033	0.000853549	0.000852089	0.000856797	NADH-quinone oxidoreductase subunit H [EC:1.6.5.3]
K00338	0.000827957	0.000839839	0.0008503	0.000820719	0.00084148	0.00085228	0.000852347	0.000852023	0.000857732	0.000854701	0.000787536	0.000849031	0.000836048	0.000306647	0.000479331	0.000853549	0.000851603	0.000856797	NADH-quinone oxidoreductase subunit I [EC:1.6.5.3]
K00339	0.000597885	0.000711687	0.000811633	0.000528372	0.000727741	0.000831457	0.000831499	0.000827683	0.000830874	0.000854701	0.000756034	0.000834184	0.000674397	0.000894386	0.000897033	0.000842889	0.000829339	0.000835813	NADH-quinone oxidoreductase subunit J [EC:1.6.5.3]
K00340	0.000827957	0.000839839	0.0008503	0.000820719	0.00084148	0.00085228	0.000852347	0.000852023	0.000857732	0.000854701	0.000856839	0.000852792	0.000836048	0.000894386	0.000897033	0.000853549	0.000852089	0.000856797	NADH-quinone oxidoreductase subunit K [EC:1.6.5.3]
K00341	0.00105803	0.000967992	0.000888968	0.00111307	0.000955219	0.000873104	0.000873195	0.000876363	0.00088459	0.000854701	0.000957643	0.0008714	0.000997699	0.000894386	0.000897033	0.000864209	0.000874839	0.00087778	NADH-quinone oxidoreductase subunit L [EC:1.6.5.3]
K00342	0.000827957	0.000839839	0.0008503	0.000820719	0.00084148	0.00085228	0.000852347	0.000852023	0.000857732	0.000854701	0.000856839	0.000852792	0.000836048	0.000894386	0.000897033	0.000853549	0.000852089	0.000856797	NADH-quinone oxidoreductase subunit M [EC:1.6.5.3]
K00343	0.00105803	0.00096828	0.000889744	0.00111307	0.000955219	0.000873104	0.000873766	0.000877611	0.000935289	0.000854701	0.00103325	0.0008714	0.000998834	0.000894386	0.00101344	0.000864928	0.000874839	0.000915144	NADH-quinone oxidoreductase subunit N [EC:1.6.5.3]
K00344	0.00165591	0.00167968	0.0017006	0.00164144	0.00168296	0.00170456	0.00170469	0.00170405	0.00171546	0.0017094	0.00171368	0.00170558	0.0016721	0.00178877	0.00179407	0.0017071	0.00170418	0.00171359	NADPH2:quinone reductase [EC:1.6.5.5]
K00356	0.000827957	0.000839839	0.0008503	0.000820719	0.00084148	0.00085228	0.000852347	0.000852023	0.000857732	0.000854701	0.000787536	0.000849031	0.000836048	0.000306647	0.000479331	0.000853549	0.000851603	0.000856797	NADH dehydrogenase [EC:1.6.99.3]
K00368	0.00413979	0.00419833	0.00424917	0.00410359	0.0042074	0.0042614	0.00426002	0.00425637	0.00413656	0.0042735	0.00371087	0.00424515	0.00417684	0.00153323	0.00204743	0.00426559	0.00425801	0.00417189	nitrite reductase (NO-forming) [EC:1.7.2.1]
K00380	0	0	0	0	0	0	0	0	0	0	0.000138606	7.52231e-06	0	0.00117548	0.000835405	0	9.7326e-07	0	sulfite reductase (NADPH) flavoprotein alpha-component [EC:1.8.1.2]
K00382	0.000597885	0.000711399	0.000810857	0.000528372	0.000727741	0.000831457	0.000830927	0.000826435	0.000780175	0.000854701	0.000680431	0.000834184	0.000673263	0.000894386	0.000780624	0.00084217	0.000829339	0.000798449	dihydrolipoamide dehydrogenase [EC:1.8.1.4]
K00383	0	0	0	0	0	0	0	0	0	0	6.93031e-05	3.76115e-06	0	0.000587739	0.000417702	0	4.8663e-07	0	glutathione reductase (NADPH) [EC:1.8.1.7]
K00384	0.00105803	0.00096828	0.000889744	0.00111307	0.000955219	0.000873104	0.000873766	0.000877611	0.000935289	0.000854701	0.00103325	0.0008714	0.000998834	0.000894386	0.00101344	0.000864928	0.000874839	0.000915144	thioredoxin reductase (NADPH) [EC:1.8.1.9]
K00390	0.000827957	0.000839839	0.0008503	0.000820719	0.00084148	0.00085228	0.000852347	0.000852023	0.000857732	0.000854701	0.000787536	0.000849031	0.000836048	0.000306647	0.000479331	0.000853549	0.000851603	0.000856797	phosphoadenosine phosphosulfate reductase [EC:1.8.4.8 1.8.4.10]
K00392	0.000827957	0.000839839	0.0008503	0.000820719	0.00084148	0.00085228	0.000852347	0.000852023	0.000857732	0.000854701	0.000787536	0.000849031	0.000836048	0.000306647	0.000479331	0.000853549	0.000851603	0.000856797	sulfite reductase (ferredoxin) [EC:1.8.7.1]
K00411	0.000827957	0.000839839	0.0008503	0.000820719	0.00084148	0.00085228	0.000852347	0.000852023	0.000857732	0.000854701	0.000787536	0.000849031	0.000836048	0.000306647	0.000479331	0.000853549	0.000851603	0.000856797	ubiquinol-cytochrome c reductase iron-sulfur subunit [EC:1.10.2.2]
K00412	0.000827957	0.000839839	0.0008503	0.000820719	0.00084148	0.00085228	0.000852347	0.000852023	0.000857732	0.000854701	0.000856839	0.000852792	0.000836048	0.000894386	0.000897033	0.000853549	0.000852089	0.000856797	ubiquinol-cytochrome c reductase cytochrome b subunit
K00432	0	0	0	0	0	0	0	0	0	0	6.93031e-05	3.76115e-06	0	0.000587739	0.000417702	0	4.8663e-07	0	glutathione peroxidase [EC:1.11.1.9]
K00453	0	0	0	0	0	0	0	0	0	0	6.93031e-05	3.76115e-06	0	0.000587739	0.000417702	0	4.8663e-07	0	tryptophan 2,3-dioxygenase [EC:1.13.11.11]
K00496	0	0	0	0	0	0	0	0	0	0	6.93031e-05	3.76115e-06	0	0.000587739	0.000417702	0	4.8663e-07	0	alkane 1-monooxygenase [EC:1.14.15.3]
K00499	0	0	0	0	0	0	0	0	0	0	6.93031e-05	3.76115e-06	0	0.000587739	0.000417702	0	4.8663e-07	0	choline monooxygenase [EC:1.14.15.7]
K00507	0	0	0	0	0	0	0	0	0	0	6.93031e-05	3.76115e-06	0	0.000587739	0.000417702	0	4.8663e-07	0	stearoyl-CoA desaturase (Delta-9 desaturase) [EC:1.14.19.1]
K00518	0	0	0	0	0	0	0	0	0	0	6.93031e-05	3.76115e-06	0	0.000587739	0.000417702	0	4.8663e-07	0	nickel superoxide dismutase [EC:1.15.1.1]
K00525	0.000827957	0.000839839	0.0008503	0.000820719	0.00084148	0.00085228	0.000852347	0.000852023	0.000857732	0.000854701	0.000856839	0.000852792	0.000836048	0.000894386	0.000897033	0.000853549	0.000852089	0.000856797	ribonucleoside-diphosphate reductase alpha chain [EC:1.17.4.1]
K00526	0	0	0	0	0	0	0	0	0	0	6.93031e-05	3.76115e-06	0	0.000587739	0.000417702	0	4.8663e-07	0	ribonucleoside-diphosphate reductase beta chain [EC:1.17.4.1]
K00528	0.00165591	0.00167997	0.00170138	0.00164144	0.00168296	0.00170456	0.00170526	0.00170529	0.00176616	0.0017094	0.00171998	0.00170182	0.00167323	0.00120103	0.00149277	0.00170782	0.00170369	0.00175096	ferredoxin/flavodoxin---NADP+ reductase [EC:1.18.1.2 1.19.1.1]
K00537	0.000827957	0.000839551	0.000849524	0.000820719	0.00084148	0.00085228	0.000851776	0.000850775	0.000807033	0.000854701	0.000781235	0.000852792	0.000834914	0.000894386	0.000780624	0.00085283	0.000852089	0.000819433	arsenate reductase [EC:1.20.4.1]
K00548	0.00165591	0.00167968	0.0017006	0.00164144	0.00168296	0.00170456	0.00170469	0.00170405	0.00171546	0.0017094	0.00157507	0.00169806	0.0016721	0.000613293	0.000958661	0.0017071	0.00170321	0.00171359	5-methyltetrahydrofolate--homocysteine methyltransferase [EC:2.1.1.13]
K00555	0.000827957	0.000839839	0.0008503	0.000820719	0.00084148	0.00085228	0.000852347	0.000852023	0.000857732	0.000854701	0.000856839	0.000852792	0.000836048	0.000894386	0.000897033	0.000853549	0.000852089	0.000856797	tRNA (guanine26-N2/guanine27-N2)-dimethyltransferase [EC:2.1.1.215 2.1.1.216]
K00558	0.000597885	0.000711687	0.000811633	0.000528372	0.000727741	0.000831457	0.000831499	0.000827683	0.000830874	0.000854701	0.000686731	0.000830423	0.000674397	0.000306647	0.000479331	0.000842889	0.000828853	0.000835813	DNA (cytosine-5)-methyltransferase 1 [EC:2.1.1.37]
K00560	0	0	0	0	0	0	0	0	0	0	6.93031e-05	3.76115e-06	0	0.000587739	0.000417702	0	4.8663e-07	0	thymidylate synthase [EC:2.1.1.45]
K00566	0.000827957	0.000839551	0.000849524	0.000820719	0.00084148	0.00085228	0.000851776	0.000850775	0.000807033	0.000854701	0.000711932	0.000849031	0.000834914	0.000306647	0.000362922	0.00085283	0.000851603	0.000819433	tRNA-uridine 2-sulfurtransferase [EC:2.8.1.13]
K00567	0.000827957	0.000839839	0.0008503	0.000820719	0.00084148	0.00085228	0.000852347	0.000852023	0.000857732	0.000854701	0.000856839	0.000852792	0.000836048	0.000894386	0.000897033	0.000853549	0.000852089	0.000856797	methylated-DNA-[protein]-cysteine S-methyltransferase [EC:2.1.1.63]
K00568	0	2.88307e-07	7.75939e-07	0	0	0	5.71182e-07	1.2482e-06	5.06989e-05	0	7.56034e-05	0	1.13439e-06	0	0.000116409	7.18677e-07	0	3.73639e-05	2-polyprenyl-6-hydroxyphenyl methylase / 3-demethylubiquinone-9 3-methyltransferase [EC:2.1.1.222 2.1.1.64]
K00569	0	0	0	0	0	0	0	0	0	0	6.93031e-05	3.76115e-06	0	0.000587739	0.000417702	0	4.8663e-07	0	thiopurine S-methyltransferase [EC:2.1.1.67]
K00571	0.000827957	0.000839839	0.0008503	0.000820719	0.00084148	0.00085228	0.000852347	0.000852023	0.000857732	0.000854701	0.000856839	0.000852792	0.000836048	0.000894386	0.000897033	0.000853549	0.000852089	0.000856797	site-specific DNA-methyltransferase (adenine-specific) [EC:2.1.1.72]
K00573	0.000230072	0.000128153	3.86676e-05	0.000292347	0.000113739	2.08236e-05	2.08482e-05	2.434e-05	2.68584e-05	0	0.000170108	2.2369e-05	0.000161651	0.000587739	0.000417702	1.06604e-05	2.32366e-05	2.09833e-05	protein-L-isoaspartate(D-aspartate) O-methyltransferase [EC:2.1.1.77]
K00574	0	2.88307e-07	7.75939e-07	0	0	0	5.71182e-07	1.2482e-06	5.06989e-05	0	7.56034e-05	0	1.13439e-06	0	0.000116409	7.18677e-07	0	3.73639e-05	cyclopropane-fatty-acyl-phospholipid synthase [EC:2.1.1.79]
K00575	0.000230072	0.000128153	3.86676e-05	0.000292347	0.000113739	2.08236e-05	2.08482e-05	2.434e-05	2.68584e-05	0	0.000100805	1.86078e-05	0.000161651	0	0	1.06604e-05	2.275e-05	2.09833e-05	chemotaxis protein methyltransferase CheR [EC:2.1.1.80]
K00577	0.000827957	0.000839551	0.000849524	0.000820719	0.00084148	0.00085228	0.000851776	0.000850775	0.000807033	0.000854701	0.000711932	0.000849031	0.000834914	0.000306647	0.000362922	0.00085283	0.000851603	0.000819433	tetrahydromethanopterin S-methyltransferase subunit A [EC:2.1.1.86]
K00595	0	2.88307e-07	7.75939e-07	0	0	0	5.71182e-07	1.2482e-06	5.06989e-05	0	7.56034e-05	0	1.13439e-06	0	0.000116409	7.18677e-07	0	3.73639e-05	precorrin-6Y C5,15-methyltransferase (decarboxylating) [EC:2.1.1.132]
K00600	0.00105803	0.000967992	0.000888968	0.00111307	0.000955219	0.000873104	0.000873195	0.000876363	0.00088459	0.000854701	0.000957643	0.0008714	0.000997699	0.000894386	0.000897033	0.000864209	0.000874839	0.00087778	glycine hydroxymethyltransferase [EC:2.1.2.1]
K00602	0	0	0	0	0	0	0	0	0	0	6.93031e-05	3.76115e-06	0	0.000587739	0.000417702	0	4.8663e-07	0	phosphoribosylaminoimidazolecarboxamide formyltransferase / IMP cyclohydrolase [EC:2.1.2.3 3.5.4.10]
K00603	0	0	0	0	0	0	0	0	0	0	6.93031e-05	3.76115e-06	0	0.000587739	0.000417702	0	4.8663e-07	0	glutamate formiminotransferase [EC:2.1.2.5]
K00604	0.000597885	0.000711687	0.000811633	0.000528372	0.000727741	0.000831457	0.000831499	0.000827683	0.000830874	0.000854701	0.000756034	0.000834184	0.000674397	0.000894386	0.000897033	0.000842889	0.000829339	0.000835813	methionyl-tRNA formyltransferase [EC:2.1.2.9]
K00605	0	0	0	0	0	0	0	0	0	0	0.000138606	7.52231e-06	0	0.00117548	0.000835405	0	9.7326e-07	0	aminomethyltransferase [EC:2.1.2.10]
K00606	0.000827957	0.000839839	0.0008503	0.000820719	0.00084148	0.00085228	0.000852347	0.000852023	0.000857732	0.000854701	0.000856839	0.000852792	0.000836048	0.000894386	0.000897033	0.000853549	0.000852089	0.000856797	3-methyl-2-oxobutanoate hydroxymethyltransferase [EC:2.1.2.11]
K00609	0.000827957	0.000839839	0.0008503	0.000820719	0.00084148	0.00085228	0.000852347	0.000852023	0.000857732	0.000854701	0.000926142	0.000856553	0.000836048	0.00148213	0.00131474	0.000853549	0.000852576	0.000856797	aspartate carbamoyltransferase catalytic subunit [EC:2.1.3.2]
K00610	0.000827957	0.000839839	0.0008503	0.000820719	0.00084148	0.00085228	0.000852347	0.000852023	0.000857732	0.000854701	0.000856839	0.000852792	0.000836048	0.000894386	0.000897033	0.000853549	0.000852089	0.000856797	aspartate carbamoyltransferase regulatory subunit
K00611	0.00105803	0.000967992	0.000888968	0.00111307	0.000955219	0.000873104	0.000873195	0.000876363	0.00088459	0.000854701	0.000957643	0.0008714	0.000997699	0.000894386	0.000897033	0.000864209	0.000874839	0.00087778	ornithine carbamoyltransferase [EC:2.1.3.3]
K00612	0.000597885	0.000711687	0.000811633	0.000528372	0.000727741	0.000831457	0.000831499	0.000827683	0.000830874	0.000854701	0.000686731	0.000830423	0.000674397	0.000306647	0.000479331	0.000842889	0.000828853	0.000835813	carbamoyltransferase [EC:2.1.3.-]
K00615	0.00165591	0.00167968	0.0017006	0.00164144	0.00168296	0.00170456	0.00170469	0.00170405	0.00171546	0.0017094	0.00178298	0.00170934	0.0016721	0.00237651	0.00221177	0.0017071	0.00170467	0.00171359	transketolase [EC:2.2.1.1]
K00616	0.000827957	0.000839839	0.0008503	0.000820719	0.00084148	0.00085228	0.000852347	0.000852023	0.000857732	0.000854701	0.000856839	0.000852792	0.000836048	0.000894386	0.000897033	0.000853549	0.000852089	0.000856797	transaldolase [EC:2.2.1.2]
K00621	0.000827957	0.000839839	0.0008503	0.000820719	0.00084148	0.00085228	0.000852347	0.000852023	0.000857732	0.000854701	0.000787536	0.000849031	0.000836048	0.000306647	0.000479331	0.000853549	0.000851603	0.000856797	glucosamine-phosphate N-acetyltransferase [EC:2.3.1.4]
K00625	0	0	0	0	0	0	0	0	0	0	6.93031e-05	3.76115e-06	0	0.000587739	0.000417702	0	4.8663e-07	0	phosphate acetyltransferase [EC:2.3.1.8]
K00626	0.00165591	0.00167968	0.0017006	0.00164144	0.00168296	0.00170456	0.00170469	0.00170405	0.00171546	0.0017094	0.00178298	0.00170934	0.0016721	0.00237651	0.00221177	0.0017071	0.00170467	0.00171359	acetyl-CoA C-acetyltransferase [EC:2.3.1.9]
K00627	0	0	0	0	0	0	0	0	0	0	6.93031e-05	3.76115e-06	0	0.000587739	0.000417702	0	4.8663e-07	0	pyruvate dehydrogenase E2 component (dihydrolipoamide acetyltransferase) [EC:2.3.1.12]
K00632	0	0	0	0	0	0	0	0	0	0	0.000207909	1.12835e-05	0	0.00176322	0.00125311	0	1.45989e-06	0	acetyl-CoA acyltransferase [EC:2.3.1.16]
K00639	0.0012881	0.00109614	0.000927636	0.00140541	0.00106896	0.000893928	0.000894043	0.000900703	0.000911449	0.000854701	0.00105845	0.000890007	0.00115935	0.000894386	0.000897033	0.00087487	0.000897589	0.000898763	glycine C-acetyltransferase [EC:2.3.1.29]
K00645	0	0	0	0	0	0	0	0	0	0	6.93031e-05	3.76115e-06	0	0.000587739	0.000417702	0	4.8663e-07	0	[acyl-carrier-protein] S-malonyltransferase [EC:2.3.1.39]
K00652	0.0012881	0.00109614	0.000927636	0.00140541	0.00106896	0.000893928	0.000894043	0.000900703	0.000911449	0.000854701	0.00105845	0.000890007	0.00115935	0.000894386	0.000897033	0.00087487	0.000897589	0.000898763	8-amino-7-oxononanoate synthase [EC:2.3.1.47]
K00655	0	0	0	0	0	0	0	0	0	0	0.000138606	7.52231e-06	0	0.00117548	0.000835405	0	9.7326e-07	0	1-acyl-sn-glycerol-3-phosphate acyltransferase [EC:2.3.1.51]
K00658	0	0	0	0	0	0	0	0	0	0	6.93031e-05	3.76115e-06	0	0.000587739	0.000417702	0	4.8663e-07	0	2-oxoglutarate dehydrogenase E2 component (dihydrolipoamide succinyltransferase) [EC:2.3.1.61]
K00661	0.00105803	0.00096828	0.000889744	0.00111307	0.000955219	0.000873104	0.000873766	0.000877611	0.000935289	0.000854701	0.000963943	0.000867639	0.000998834	0.000306647	0.000595739	0.000864928	0.000874353	0.000915144	maltose O-acetyltransferase [EC:2.3.1.79]
K00662	0.000597885	0.000711399	0.000810857	0.000528372	0.000727741	0.000831457	0.000830927	0.000826435	0.000780175	0.000854701	0.000611128	0.000830423	0.000673263	0.000306647	0.000362922	0.00084217	0.000828853	0.000798449	aminoglycoside 3-N-acetyltransferase [EC:2.3.1.81]
K00666	0	0	0	0	0	0	0	0	0	0	6.93031e-05	3.76115e-06	0	0.000587739	0.000417702	0	4.8663e-07	0	fatty-acyl-CoA synthase [EC:6.2.1.-]
K00674	0.000597885	0.000711399	0.000810857	0.000528372	0.000727741	0.000831457	0.000830927	0.000826435	0.000780175	0.000854701	0.000611128	0.000830423	0.000673263	0.000306647	0.000362922	0.00084217	0.000828853	0.000798449	2,3,4,5-tetrahydropyridine-2,6-dicarboxylate N-succinyltransferase [EC:2.3.1.117]
K00681	0.0012881	0.00109586	0.00092686	0.00140541	0.00106896	0.000893928	0.000893472	0.000899455	0.00086075	0.000854701	0.000913541	0.000886246	0.00115822	0.000306647	0.000362922	0.000874151	0.000897103	0.000861399	gamma-glutamyltranspeptidase / glutathione hydrolase [EC:2.3.2.2 3.4.19.13]
K00694	0.000827957	0.000839551	0.000849524	0.000820719	0.00084148	0.00085228	0.000851776	0.000850775	0.000807033	0.000854701	0.000711932	0.000849031	0.000834914	0.000306647	0.000362922	0.00085283	0.000851603	0.000819433	cellulose synthase (UDP-forming) [EC:2.4.1.12]
K00721	0.000827957	0.000840128	0.000851076	0.000820719	0.00084148	0.00085228	0.000852918	0.000853271	0.000908431	0.000854701	0.000932442	0.000852792	0.000837183	0.000894386	0.00101344	0.000854268	0.000852089	0.00089416	dolichol-phosphate mannosyltransferase [EC:2.4.1.83]
K00754	0	5.76615e-07	1.55188e-06	0	0	0	1.14236e-06	2.49641e-06	0.000101398	0	0.000151207	0	2.26879e-06	0	0.000232818	1.43735e-06	0	7.47277e-05	L-malate glycosyltransferase [EC:2.4.1.-]
K00756	0	0	0	0	0	0	0	0	0	0	6.93031e-05	3.76115e-06	0	0.000587739	0.000417702	0	4.8663e-07	0	pyrimidine-nucleoside phosphorylase [EC:2.4.2.2]
K00758	0	0	0	0	0	0	0	0	0	0	6.93031e-05	3.76115e-06	0	0.000587739	0.000417702	0	4.8663e-07	0	thymidine phosphorylase [EC:2.4.2.4]
K00759	0.000827957	0.000839839	0.0008503	0.000820719	0.00084148	0.00085228	0.000852347	0.000852023	0.000857732	0.000854701	0.000856839	0.000852792	0.000836048	0.000894386	0.000897033	0.000853549	0.000852089	0.000856797	adenine phosphoribosyltransferase [EC:2.4.2.7]
K00762	0.000827957	0.000839839	0.0008503	0.000820719	0.00084148	0.00085228	0.000852347	0.000852023	0.000857732	0.000854701	0.000856839	0.000852792	0.000836048	0.000894386	0.000897033	0.000853549	0.000852089	0.000856797	orotate phosphoribosyltransferase [EC:2.4.2.10]
K00764	0.000827957	0.000839839	0.0008503	0.000820719	0.00084148	0.00085228	0.000852347	0.000852023	0.000857732	0.000854701	0.000856839	0.000852792	0.000836048	0.000894386	0.000897033	0.000853549	0.000852089	0.000856797	amidophosphoribosyltransferase [EC:2.4.2.14]
K00765	0.000827957	0.000839839	0.0008503	0.000820719	0.00084148	0.00085228	0.000852347	0.000852023	0.000857732	0.000854701	0.000787536	0.000849031	0.000836048	0.000306647	0.000479331	0.000853549	0.000851603	0.000856797	ATP phosphoribosyltransferase [EC:2.4.2.17]
K00766	0.000827957	0.000839839	0.0008503	0.000820719	0.00084148	0.00085228	0.000852347	0.000852023	0.000857732	0.000854701	0.000787536	0.000849031	0.000836048	0.000306647	0.000479331	0.000853549	0.000851603	0.000856797	anthranilate phosphoribosyltransferase [EC:2.4.2.18]
K00767	0.000827957	0.000839839	0.0008503	0.000820719	0.00084148	0.00085228	0.000852347	0.000852023	0.000857732	0.000854701	0.000856839	0.000852792	0.000836048	0.000894386	0.000897033	0.000853549	0.000852089	0.000856797	nicotinate-nucleotide pyrophosphorylase (carboxylating) [EC:2.4.2.19]
K00769	0.000230072	0.000128153	3.86676e-05	0.000292347	0.000113739	2.08236e-05	2.08482e-05	2.434e-05	2.68584e-05	0	0.000100805	1.86078e-05	0.000161651	0	0	1.06604e-05	2.275e-05	2.09833e-05	xanthine phosphoribosyltransferase [EC:2.4.2.22]
K00772	0.000827957	0.000839839	0.0008503	0.000820719	0.00084148	0.00085228	0.000852347	0.000852023	0.000857732	0.000854701	0.000787536	0.000849031	0.000836048	0.000306647	0.000479331	0.000853549	0.000851603	0.000856797	5-methylthioadenosine phosphorylase [EC:2.4.2.28]
K00783	0	0	0	0	0	0	0	0	0	0	6.93031e-05	3.76115e-06	0	0.000587739	0.000417702	0	4.8663e-07	0	23S rRNA (pseudouridine1915-N3)-methyltransferase [EC:2.1.1.177]
K00784	0.000827957	0.000839839	0.0008503	0.000820719	0.00084148	0.00085228	0.000852347	0.000852023	0.000857732	0.000854701	0.000926142	0.000856553	0.000836048	0.00148213	0.00131474	0.000853549	0.000852576	0.000856797	ribonuclease Z [EC:3.1.26.11]
K00789	0.000827957	0.000839839	0.0008503	0.000820719	0.00084148	0.00085228	0.000852347	0.000852023	0.000857732	0.000854701	0.000856839	0.000852792	0.000836048	0.000894386	0.000897033	0.000853549	0.000852089	0.000856797	S-adenosylmethionine synthetase [EC:2.5.1.6]
K00791	0	0	0	0	0	0	0	0	0	0	6.93031e-05	3.76115e-06	0	0.000587739	0.000417702	0	4.8663e-07	0	tRNA dimethylallyltransferase [EC:2.5.1.75]
K00793	0.000827957	0.000839839	0.0008503	0.000820719	0.00084148	0.00085228	0.000852347	0.000852023	0.000857732	0.000854701	0.000856839	0.000852792	0.000836048	0.000894386	0.000897033	0.000853549	0.000852089	0.000856797	riboflavin synthase [EC:2.5.1.9]
K00794	0.000827957	0.000839839	0.0008503	0.000820719	0.00084148	0.00085228	0.000852347	0.000852023	0.000857732	0.000854701	0.000856839	0.000852792	0.000836048	0.000894386	0.000897033	0.000853549	0.000852089	0.000856797	6,7-dimethyl-8-ribityllumazine synthase [EC:2.5.1.78]
K00796	0.000827957	0.000839839	0.0008503	0.000820719	0.00084148	0.00085228	0.000852347	0.000852023	0.000857732	0.000854701	0.000856839	0.000852792	0.000836048	0.000894386	0.000897033	0.000853549	0.000852089	0.000856797	dihydropteroate synthase [EC:2.5.1.15]
K00798	0.000827957	0.000839839	0.0008503	0.000820719	0.00084148	0.00085228	0.000852347	0.000852023	0.000857732	0.000854701	0.000856839	0.000852792	0.000836048	0.000894386	0.000897033	0.000853549	0.000852089	0.000856797	cob(I)alamin adenosyltransferase [EC:2.5.1.17]
K00799	0	0	0	0	0	0	0	0	0	0	6.93031e-05	3.76115e-06	0	0.000587739	0.000417702	0	4.8663e-07	0	glutathione S-transferase [EC:2.5.1.18]
K00800	0.000827957	0.000839839	0.0008503	0.000820719	0.00084148	0.00085228	0.000852347	0.000852023	0.000857732	0.000854701	0.000856839	0.000852792	0.000836048	0.000894386	0.000897033	0.000853549	0.000852089	0.000856797	3-phosphoshikimate 1-carboxyvinyltransferase [EC:2.5.1.19]
K00801	0	0	0	0	0	0	0	0	0	0	6.93031e-05	3.76115e-06	0	0.000587739	0.000417702	0	4.8663e-07	0	farnesyl-diphosphate farnesyltransferase [EC:2.5.1.21]
K00806	0.000827957	0.000839839	0.0008503	0.000820719	0.00084148	0.00085228	0.000852347	0.000852023	0.000857732	0.000854701	0.000856839	0.000852792	0.000836048	0.000894386	0.000897033	0.000853549	0.000852089	0.000856797	undecaprenyl diphosphate synthase [EC:2.5.1.31]
K00809	0.00165591	0.00167968	0.0017006	0.00164144	0.00168296	0.00170456	0.00170469	0.00170405	0.00171546	0.0017094	0.00171368	0.00170558	0.0016721	0.00178877	0.00179407	0.0017071	0.00170418	0.00171359	deoxyhypusine synthase [EC:2.5.1.46]
K00812	0.00271394	0.00264738	0.00258879	0.0027545	0.00263818	0.00257766	0.00257732	0.00257916	0.00254936	0.0025641	0.00252641	0.00257322	0.00266866	0.00209542	0.00215699	0.00257059	0.00257853	0.00255401	aspartate aminotransferase [EC:2.6.1.1]
K00817	0.00248387	0.00251894	0.00254935	0.00246216	0.00252444	0.00255684	0.0025559	0.00255357	0.0024718	0.0025641	0.0022114	0.00254709	0.00250588	0.00091994	0.00120517	0.00255921	0.00255481	0.00249566	histidinol-phosphate aminotransferase [EC:2.6.1.9]
K00819	0.000827957	0.000839551	0.000849524	0.000820719	0.00084148	0.00085228	0.000851776	0.000850775	0.000807033	0.000854701	0.000711932	0.000849031	0.000834914	0.000306647	0.000362922	0.00085283	0.000851603	0.000819433	ornithine--oxo-acid transaminase [EC:2.6.1.13]
K00820	0.000827957	0.000839839	0.0008503	0.000820719	0.00084148	0.00085228	0.000852347	0.000852023	0.000857732	0.000854701	0.000856839	0.000852792	0.000836048	0.000894386	0.000897033	0.000853549	0.000852089	0.000856797	glucosamine---fructose-6-phosphate aminotransferase (isomerizing) [EC:2.6.1.16]
K00821	0.000827957	0.000839839	0.0008503	0.000820719	0.00084148	0.00085228	0.000852347	0.000852023	0.000857732	0.000854701	0.000787536	0.000849031	0.000836048	0.000306647	0.000479331	0.000853549	0.000851603	0.000856797	acetylornithine/N-succinyldiaminopimelate aminotransferase [EC:2.6.1.11 2.6.1.17]
K00823	0.000597885	0.000711687	0.000811633	0.000528372	0.000727741	0.000831457	0.000831499	0.000827683	0.000830874	0.000854701	0.000686731	0.000830423	0.000674397	0.000306647	0.000479331	0.000842889	0.000828853	0.000835813	4-aminobutyrate aminotransferase [EC:2.6.1.19]
K00824	0	2.88307e-07	7.75939e-07	0	0	0	5.71182e-07	1.2482e-06	5.06989e-05	0	7.56034e-05	0	1.13439e-06	0	0.000116409	7.18677e-07	0	3.73639e-05	D-alanine transaminase [EC:2.6.1.21]
K00826	0.00165591	0.00167968	0.0017006	0.00164144	0.00168296	0.00170456	0.00170469	0.00170405	0.00171546	0.0017094	0.00164437	0.00170182	0.0016721	0.00120103	0.00137636	0.0017071	0.00170369	0.00171359	branched-chain amino acid aminotransferase [EC:2.6.1.42]
K00830	0.000597885	0.000711399	0.000810857	0.000528372	0.000727741	0.000831457	0.000830927	0.000826435	0.000780175	0.000854701	0.000611128	0.000830423	0.000673263	0.000306647	0.000362922	0.00084217	0.000828853	0.000798449	alanine-glyoxylate transaminase / serine-glyoxylate transaminase / serine-pyruvate transaminase [EC:2.6.1.44 2.6.1.45 2.6.1.51]
K00833	0.000827957	0.000839839	0.0008503	0.000820719	0.00084148	0.00085228	0.000852347	0.000852023	0.000857732	0.000854701	0.000787536	0.000849031	0.000836048	0.000306647	0.000479331	0.000853549	0.000851603	0.000856797	adenosylmethionine---8-amino-7-oxononanoate aminotransferase [EC:2.6.1.62]
K00836	0.000597885	0.000711399	0.000810857	0.000528372	0.000727741	0.000831457	0.000830927	0.000826435	0.000780175	0.000854701	0.000611128	0.000830423	0.000673263	0.000306647	0.000362922	0.00084217	0.000828853	0.000798449	diaminobutyrate-2-oxoglutarate transaminase [EC:2.6.1.76]
K00841	0.000230072	0.000128441	3.94436e-05	0.000292347	0.000113739	2.08236e-05	2.14193e-05	2.55882e-05	7.75573e-05	0	0.000176408	1.86078e-05	0.000162786	0	0.000116409	1.13791e-05	2.275e-05	5.83472e-05	aminotransferase [EC:2.6.1.-]
K00845	0	2.88307e-07	7.75939e-07	0	0	0	5.71182e-07	1.2482e-06	5.06989e-05	0	7.56034e-05	0	1.13439e-06	0	0.000116409	7.18677e-07	0	3.73639e-05	glucokinase [EC:2.7.1.2]
K00847	0.00105803	0.000967992	0.000888968	0.00111307	0.000955219	0.000873104	0.000873195	0.000876363	0.00088459	0.000854701	0.00088834	0.000867639	0.000997699	0.000306647	0.000479331	0.000864209	0.000874353	0.00087778	fructokinase [EC:2.7.1.4]
K00849	0	0	0	0	0	0	0	0	0	0	6.93031e-05	3.76115e-06	0	0.000587739	0.000417702	0	4.8663e-07	0	galactokinase [EC:2.7.1.6]
K00852	0.000827957	0.000839839	0.0008503	0.000820719	0.00084148	0.00085228	0.000852347	0.000852023	0.000857732	0.000854701	0.000787536	0.000849031	0.000836048	0.000306647	0.000479331	0.000853549	0.000851603	0.000856797	ribokinase [EC:2.7.1.15]
K00858	0.00165591	0.00167968	0.0017006	0.00164144	0.00168296	0.00170456	0.00170469	0.00170405	0.00171546	0.0017094	0.00157507	0.00169806	0.0016721	0.000613293	0.000958661	0.0017071	0.00170321	0.00171359	NAD+ kinase [EC:2.7.1.23]
K00860	0.000827957	0.000839839	0.0008503	0.000820719	0.00084148	0.00085228	0.000852347	0.000852023	0.000857732	0.000854701	0.000787536	0.000849031	0.000836048	0.000306647	0.000479331	0.000853549	0.000851603	0.000856797	adenylylsulfate kinase [EC:2.7.1.25]
K00869	0.000827957	0.000839839	0.0008503	0.000820719	0.00084148	0.00085228	0.000852347	0.000852023	0.000857732	0.000854701	0.000856839	0.000852792	0.000836048	0.000894386	0.000897033	0.000853549	0.000852089	0.000856797	mevalonate kinase [EC:2.7.1.36]
K00872	0.00105803	0.000967992	0.000888968	0.00111307	0.000955219	0.000873104	0.000873195	0.000876363	0.00088459	0.000854701	0.00088834	0.000867639	0.000997699	0.000306647	0.000479331	0.000864209	0.000874353	0.00087778	homoserine kinase [EC:2.7.1.39]
K00873	0	0	0	0	0	0	0	0	0	0	6.93031e-05	3.76115e-06	0	0.000587739	0.000417702	0	4.8663e-07	0	pyruvate kinase [EC:2.7.1.40]
K00891	0.000827957	0.000839839	0.0008503	0.000820719	0.00084148	0.00085228	0.000852347	0.000852023	0.000857732	0.000854701	0.000787536	0.000849031	0.000836048	0.000306647	0.000479331	0.000853549	0.000851603	0.000856797	shikimate kinase [EC:2.7.1.71]
K00926	0	0	0	0	0	0	0	0	0	0	6.93031e-05	3.76115e-06	0	0.000587739	0.000417702	0	4.8663e-07	0	carbamate kinase [EC:2.7.2.2]
K00927	0.000827957	0.000839839	0.0008503	0.000820719	0.00084148	0.00085228	0.000852347	0.000852023	0.000857732	0.000854701	0.000856839	0.000852792	0.000836048	0.000894386	0.000897033	0.000853549	0.000852089	0.000856797	phosphoglycerate kinase [EC:2.7.2.3]
K00928	0.00165591	0.00167968	0.0017006	0.00164144	0.00168296	0.00170456	0.00170469	0.00170405	0.00171546	0.0017094	0.00157507	0.00169806	0.0016721	0.000613293	0.000958661	0.0017071	0.00170321	0.00171359	aspartate kinase [EC:2.7.2.4]
K00939	0.000827957	0.000839839	0.0008503	0.000820719	0.00084148	0.00085228	0.000852347	0.000852023	0.000857732	0.000854701	0.000856839	0.000852792	0.000836048	0.000894386	0.000897033	0.000853549	0.000852089	0.000856797	adenylate kinase [EC:2.7.4.3]
K00940	0.000827957	0.000839839	0.0008503	0.000820719	0.00084148	0.00085228	0.000852347	0.000852023	0.000857732	0.000854701	0.000856839	0.000852792	0.000836048	0.000894386	0.000897033	0.000853549	0.000852089	0.000856797	nucleoside-diphosphate kinase [EC:2.7.4.6]
K00941	0.000827957	0.000839839	0.0008503	0.000820719	0.00084148	0.00085228	0.000852347	0.000852023	0.000857732	0.000854701	0.000787536	0.000849031	0.000836048	0.000306647	0.000479331	0.000853549	0.000851603	0.000856797	hydroxymethylpyrimidine/phosphomethylpyrimidine kinase [EC:2.7.1.49 2.7.4.7]
K00943	0.000827957	0.000839839	0.0008503	0.000820719	0.00084148	0.00085228	0.000852347	0.000852023	0.000857732	0.000854701	0.000856839	0.000852792	0.000836048	0.000894386	0.000897033	0.000853549	0.000852089	0.000856797	dTMP kinase [EC:2.7.4.9]
K00945	0.000827957	0.000839839	0.0008503	0.000820719	0.00084148	0.00085228	0.000852347	0.000852023	0.000857732	0.000854701	0.000787536	0.000849031	0.000836048	0.000306647	0.000479331	0.000853549	0.000851603	0.000856797	CMP/dCMP kinase [EC:2.7.4.25]
K00946	0.000827957	0.000839839	0.0008503	0.000820719	0.00084148	0.00085228	0.000852347	0.000852023	0.000857732	0.000854701	0.000787536	0.000849031	0.000836048	0.000306647	0.000479331	0.000853549	0.000851603	0.000856797	thiamine-monophosphate kinase [EC:2.7.4.16]
K00948	0.000827957	0.000839839	0.0008503	0.000820719	0.00084148	0.00085228	0.000852347	0.000852023	0.000857732	0.000854701	0.000856839	0.000852792	0.000836048	0.000894386	0.000897033	0.000853549	0.000852089	0.000856797	ribose-phosphate pyrophosphokinase [EC:2.7.6.1]
K00949	0	0	0	0	0	0	0	0	0	0	6.93031e-05	3.76115e-06	0	0.000587739	0.000417702	0	4.8663e-07	0	thiamine pyrophosphokinase [EC:2.7.6.2]
K00950	0.000230072	0.000128153	3.86676e-05	0.000292347	0.000113739	2.08236e-05	2.08482e-05	2.434e-05	2.68584e-05	0	0.000100805	1.86078e-05	0.000161651	0	0	1.06604e-05	2.275e-05	2.09833e-05	2-amino-4-hydroxy-6-hydroxymethyldihydropteridine diphosphokinase [EC:2.7.6.3]
K00952	0.00165591	0.00167939	0.00169982	0.00164144	0.00168296	0.00170456	0.00170412	0.0017028	0.00166477	0.0017094	0.00149947	0.00169806	0.00167096	0.000613293	0.000842252	0.00170638	0.00170321	0.00167623	nicotinamide-nucleotide adenylyltransferase [EC:2.7.7.1]
K00955	0.000230072	0.000128153	3.86676e-05	0.000292347	0.000113739	2.08236e-05	2.08482e-05	2.434e-05	2.68584e-05	0	0.000100805	1.86078e-05	0.000161651	0	0	1.06604e-05	2.275e-05	2.09833e-05	bifunctional enzyme CysN/CysC [EC:2.7.7.4 2.7.1.25]
K00956	0.000597885	0.000711399	0.000810857	0.000528372	0.000727741	0.000831457	0.000830927	0.000826435	0.000780175	0.000854701	0.000611128	0.000830423	0.000673263	0.000306647	0.000362922	0.00084217	0.000828853	0.000798449	sulfate adenylyltransferase subunit 1 [EC:2.7.7.4]
K00958	0.000827957	0.000839839	0.0008503	0.000820719	0.00084148	0.00085228	0.000852347	0.000852023	0.000857732	0.000854701	0.000787536	0.000849031	0.000836048	0.000306647	0.000479331	0.000853549	0.000851603	0.000856797	sulfate adenylyltransferase [EC:2.7.7.4]
K00962	0	5.76615e-07	1.55188e-06	0	0	0	1.14236e-06	2.49641e-06	0.000101398	0	0.00022051	3.76115e-06	2.26879e-06	0.000587739	0.00065052	1.43735e-06	4.8663e-07	7.47277e-05	polyribonucleotide nucleotidyltransferase [EC:2.7.7.8]
K00963	0	2.88307e-07	7.75939e-07	0	0	0	5.71182e-07	1.2482e-06	5.06989e-05	0	0.000144907	3.76115e-06	1.13439e-06	0.000587739	0.000534111	7.18677e-07	4.8663e-07	3.73639e-05	UTP--glucose-1-phosphate uridylyltransferase [EC:2.7.7.9]
K00965	0.000827957	0.000839839	0.0008503	0.000820719	0.00084148	0.00085228	0.000852347	0.000852023	0.000857732	0.000854701	0.000787536	0.000849031	0.000836048	0.000306647	0.000479331	0.000853549	0.000851603	0.000856797	UDPglucose--hexose-1-phosphate uridylyltransferase [EC:2.7.7.12]
K00966	0.00248387	0.00251923	0.00255013	0.00246216	0.00252444	0.00255684	0.00255647	0.00255482	0.0025225	0.0025641	0.00242561	0.00255461	0.00250701	0.00209542	0.00215699	0.00255993	0.00255578	0.00253303	mannose-1-phosphate guanylyltransferase [EC:2.7.7.13]
K00970	0	0	0	0	0	0	0	0	0	0	6.93031e-05	3.76115e-06	0	0.000587739	0.000417702	0	4.8663e-07	0	poly(A) polymerase [EC:2.7.7.19]
K00973	0.00142584	0.0015521	0.00166348	0.00134909	0.00156922	0.00168374	0.00168499	0.0016822	0.00179	0.0017094	0.00176408	0.00168698	0.00151271	0.00178877	0.00202688	0.00169787	0.00168143	0.00176734	glucose-1-phosphate thymidylyltransferase [EC:2.7.7.24]
K00974	0	0	0	0	0	0	0	0	0	0	6.93031e-05	3.76115e-06	0	0.000587739	0.000417702	0	4.8663e-07	0	tRNA nucleotidyltransferase (CCA-adding enzyme) [EC:2.7.7.72 3.1.3.- 3.1.4.-]
K00980	0	0	0	0	0	0	0	0	0	0	6.93031e-05	3.76115e-06	0	0.000587739	0.000417702	0	4.8663e-07	0	glycerol-3-phosphate cytidylyltransferase [EC:2.7.7.39]
K00983	0.000230072	0.000128153	3.86676e-05	0.000292347	0.000113739	2.08236e-05	2.08482e-05	2.434e-05	2.68584e-05	0	0.000100805	1.86078e-05	0.000161651	0	0	1.06604e-05	2.275e-05	2.09833e-05	N-acylneuraminate cytidylyltransferase [EC:2.7.7.43]
K00989	0.000827957	0.000839551	0.000849524	0.000820719	0.00084148	0.00085228	0.000851776	0.000850775	0.000807033	0.000854701	0.000781235	0.000852792	0.000834914	0.000894386	0.000780624	0.00085283	0.000852089	0.000819433	ribonuclease PH [EC:2.7.7.56]
K00992	0.000597885	0.000711687	0.000811633	0.000528372	0.000727741	0.000831457	0.000831499	0.000827683	0.000830874	0.000854701	0.000686731	0.000830423	0.000674397	0.000306647	0.000479331	0.000842889	0.000828853	0.000835813	MurNAc alpha-1-phosphate uridylyltransferase [EC:2.7.7.-]
K00995	0	2.88307e-07	7.75939e-07	0	0	0	5.71182e-07	1.2482e-06	5.06989e-05	0	7.56034e-05	0	1.13439e-06	0	0.000116409	7.18677e-07	0	3.73639e-05	CDP-diacylglycerol---glycerol-3-phosphate 3-phosphatidyltransferase [EC:2.7.8.5]
K00997	0.000827957	0.000839839	0.0008503	0.000820719	0.00084148	0.00085228	0.000852347	0.000852023	0.000857732	0.000854701	0.000787536	0.000849031	0.000836048	0.000306647	0.000479331	0.000853549	0.000851603	0.000856797	holo-[acyl-carrier protein] synthase [EC:2.7.8.7]
K01001	0.000827957	0.000839839	0.0008503	0.000820719	0.00084148	0.00085228	0.000852347	0.000852023	0.000857732	0.000854701	0.000787536	0.000849031	0.000836048	0.000306647	0.000479331	0.000853549	0.000851603	0.000856797	UDP-N-acetylglucosamine--dolichyl-phosphate N-acetylglucosaminephosphotransferase [EC:2.7.8.15]
K01003	0.000827957	0.000839551	0.000849524	0.000820719	0.00084148	0.00085228	0.000851776	0.000850775	0.000807033	0.000854701	0.000711932	0.000849031	0.000834914	0.000306647	0.000362922	0.00085283	0.000851603	0.000819433	oxaloacetate decarboxylase [EC:4.1.1.3]
K01006	0.000827957	0.000839839	0.0008503	0.000820719	0.00084148	0.00085228	0.000852347	0.000852023	0.000857732	0.000854701	0.000787536	0.000849031	0.000836048	0.000306647	0.000479331	0.000853549	0.000851603	0.000856797	pyruvate, orthophosphate dikinase [EC:2.7.9.1]
K01011	0.00271394	0.00264738	0.00258879	0.0027545	0.00263818	0.00257766	0.00257732	0.00257916	0.00254936	0.0025641	0.00245711	0.00256946	0.00266866	0.00150768	0.00173929	0.00257059	0.00257804	0.00255401	thiosulfate/3-mercaptopyruvate sulfurtransferase [EC:2.8.1.1 2.8.1.2]
K01012	0.000827957	0.000839839	0.0008503	0.000820719	0.00084148	0.00085228	0.000852347	0.000852023	0.000857732	0.000854701	0.000787536	0.000849031	0.000836048	0.000306647	0.000479331	0.000853549	0.000851603	0.000856797	biotin synthase [EC:2.8.1.6]
K01057	0.000230072	0.000128153	3.86676e-05	0.000292347	0.000113739	2.08236e-05	2.08482e-05	2.434e-05	2.68584e-05	0	0.000100805	1.86078e-05	0.000161651	0	0	1.06604e-05	2.275e-05	2.09833e-05	6-phosphogluconolactonase [EC:3.1.1.31]
K01061	0.000460145	0.000256305	7.73353e-05	0.000584693	0.000227478	4.16472e-05	4.16963e-05	4.86799e-05	5.37167e-05	0	0.000201609	3.72156e-05	0.000323302	0	0	2.13208e-05	4.54999e-05	4.19666e-05	carboxymethylenebutenolidase [EC:3.1.1.45]
K01069	0.00105803	0.000967992	0.000888968	0.00111307	0.000955219	0.000873104	0.000873195	0.000876363	0.00088459	0.000854701	0.000957643	0.0008714	0.000997699	0.000894386	0.000897033	0.000864209	0.000874839	0.00087778	hydroxyacylglutathione hydrolase [EC:3.1.2.6]
K01079	0.000827957	0.000839839	0.0008503	0.000820719	0.00084148	0.00085228	0.000852347	0.000852023	0.000857732	0.000854701	0.000856839	0.000852792	0.000836048	0.000894386	0.000897033	0.000853549	0.000852089	0.000856797	phosphoserine phosphatase [EC:3.1.3.3]
K01082	0.000827957	0.000839839	0.0008503	0.000820719	0.00084148	0.00085228	0.000852347	0.000852023	0.000857732	0.000854701	0.000787536	0.000849031	0.000836048	0.000306647	0.000479331	0.000853549	0.000851603	0.000856797	3(2), 5-bisphosphate nucleotidase [EC:3.1.3.7]
K01089	0.000230072	0.000128153	3.86676e-05	0.000292347	0.000113739	2.08236e-05	2.08482e-05	2.434e-05	2.68584e-05	0	0.000100805	1.86078e-05	0.000161651	0	0	1.06604e-05	2.275e-05	2.09833e-05	imidazoleglycerol-phosphate dehydratase / histidinol-phosphatase [EC:4.2.1.19 3.1.3.15]
K01092	0.000827957	0.000840128	0.000851076	0.000820719	0.00084148	0.00085228	0.000852918	0.000853271	0.000908431	0.000854701	0.000863139	0.000849031	0.000837183	0.000306647	0.000595739	0.000854268	0.000851603	0.00089416	myo-inositol-1(or 4)-monophosphatase [EC:3.1.3.25]
K01126	0	0	0	0	0	0	0	0	0	0	6.93031e-05	3.76115e-06	0	0.000587739	0.000417702	0	4.8663e-07	0	glycerophosphoryl diester phosphodiesterase [EC:3.1.4.46]
K01127	0	0	0	0	0	0	0	0	0	0	6.93031e-05	3.76115e-06	0	0.000587739	0.000417702	0	4.8663e-07	0	glycosylphosphatidylinositol phospholipase D [EC:3.1.4.50]
K01142	0	0	0	0	0	0	0	0	0	0	6.93031e-05	3.76115e-06	0	0.000587739	0.000417702	0	4.8663e-07	0	exodeoxyribonuclease III [EC:3.1.11.2]
K01151	0.000827957	0.000839839	0.0008503	0.000820719	0.00084148	0.00085228	0.000852347	0.000852023	0.000857732	0.000854701	0.000856839	0.000852792	0.000836048	0.000894386	0.000897033	0.000853549	0.000852089	0.000856797	deoxyribonuclease IV [EC:3.1.21.2]
K01153	0.000597885	0.000711399	0.000810857	0.000528372	0.000727741	0.000831457	0.000830927	0.000826435	0.000780175	0.000854701	0.000611128	0.000830423	0.000673263	0.000306647	0.000362922	0.00084217	0.000828853	0.000798449	type I restriction enzyme, R subunit [EC:3.1.21.3]
K01154	0.00119577	0.0014228	0.00162171	0.00105674	0.00145548	0.00166291	0.00166185	0.00165287	0.00156035	0.0017094	0.00122226	0.00166085	0.00134653	0.000613293	0.000725843	0.00168434	0.00165771	0.0015969	type I restriction enzyme, S subunit [EC:3.1.21.3]
K01170	0.00165591	0.00167968	0.0017006	0.00164144	0.00168296	0.00170456	0.00170469	0.00170405	0.00171546	0.0017094	0.00157507	0.00169806	0.0016721	0.000613293	0.000958661	0.0017071	0.00170321	0.00171359	tRNA-intron endonuclease, archaea type [EC:4.6.1.16]
K01174	0.000827957	0.000839839	0.0008503	0.000820719	0.00084148	0.00085228	0.000852347	0.000852023	0.000857732	0.000854701	0.000787536	0.000849031	0.000836048	0.000306647	0.000479331	0.000853549	0.000851603	0.000856797	micrococcal nuclease [EC:3.1.31.1]
K01186	0	2.88307e-07	7.75939e-07	0	0	0	5.71182e-07	1.2482e-06	5.06989e-05	0	7.56034e-05	0	1.13439e-06	0	0.000116409	7.18677e-07	0	3.73639e-05	sialidase-1 [EC:3.2.1.18]
K01246	0.000827957	0.000839551	0.000849524	0.000820719	0.00084148	0.00085228	0.000851776	0.000850775	0.000807033	0.000854701	0.000711932	0.000849031	0.000834914	0.000306647	0.000362922	0.00085283	0.000851603	0.000819433	DNA-3-methyladenine glycosylase I [EC:3.2.2.20]
K01247	0	2.88307e-07	7.75939e-07	0	0	0	5.71182e-07	1.2482e-06	5.06989e-05	0	0.000144907	3.76115e-06	1.13439e-06	0.000587739	0.000534111	7.18677e-07	4.8663e-07	3.73639e-05	DNA-3-methyladenine glycosylase II [EC:3.2.2.21]
K01251	0.000827957	0.000839839	0.0008503	0.000820719	0.00084148	0.00085228	0.000852347	0.000852023	0.000857732	0.000854701	0.000856839	0.000852792	0.000836048	0.000894386	0.000897033	0.000853549	0.000852089	0.000856797	adenosylhomocysteinase [EC:3.3.1.1]
K01255	0.000827957	0.000839839	0.0008503	0.000820719	0.00084148	0.00085228	0.000852347	0.000852023	0.000857732	0.000854701	0.000856839	0.000852792	0.000836048	0.000894386	0.000897033	0.000853549	0.000852089	0.000856797	leucyl aminopeptidase [EC:3.4.11.1]
K01256	0.00308176	0.00323034	0.00336021	0.00299053	0.00325218	0.0033883	0.00338683	0.00338001	0.00325197	0.0034188	0.00282253	0.00337751	0.00317914	0.00122659	0.0015681	0.00340138	0.00338366	0.00329411	aminopeptidase N [EC:3.4.11.2]
K01259	0	0	0	0	0	0	0	0	0	0	6.93031e-05	3.76115e-06	0	0.000587739	0.000417702	0	4.8663e-07	0	proline iminopeptidase [EC:3.4.11.5]
K01262	0.000827957	0.000839839	0.0008503	0.000820719	0.00084148	0.00085228	0.000852347	0.000852023	0.000857732	0.000854701	0.000856839	0.000852792	0.000836048	0.000894386	0.000897033	0.000853549	0.000852089	0.000856797	Xaa-Pro aminopeptidase [EC:3.4.11.9]
K01265	0.000827957	0.000839839	0.0008503	0.000820719	0.00084148	0.00085228	0.000852347	0.000852023	0.000857732	0.000854701	0.000856839	0.000852792	0.000836048	0.000894386	0.000897033	0.000853549	0.000852089	0.000856797	methionyl aminopeptidase [EC:3.4.11.18]
K01271	0.000827957	0.000839839	0.0008503	0.000820719	0.00084148	0.00085228	0.000852347	0.000852023	0.000857732	0.000854701	0.000787536	0.000849031	0.000836048	0.000306647	0.000479331	0.000853549	0.000851603	0.000856797	Xaa-Pro dipeptidase [EC:3.4.13.9]
K01281	0	0	0	0	0	0	0	0	0	0	6.93031e-05	3.76115e-06	0	0.000587739	0.000417702	0	4.8663e-07	0	X-Pro dipeptidyl-peptidase [EC:3.4.14.11]
K01299	0	0	0	0	0	0	0	0	0	0	6.93031e-05	3.76115e-06	0	0.000587739	0.000417702	0	4.8663e-07	0	carboxypeptidase Taq [EC:3.4.17.19]
K01304	0	0	0	0	0	0	0	0	0	0	6.93031e-05	3.76115e-06	0	0.000587739	0.000417702	0	4.8663e-07	0	pyroglutamyl-peptidase [EC:3.4.19.3]
K01338	0	0	0	0	0	0	0	0	0	0	6.93031e-05	3.76115e-06	0	0.000587739	0.000417702	0	4.8663e-07	0	ATP-dependent Lon protease [EC:3.4.21.53]
K01342	0	2.88307e-07	7.75939e-07	0	0	0	5.71182e-07	1.2482e-06	5.06989e-05	0	7.56034e-05	0	1.13439e-06	0	0.000116409	7.18677e-07	0	3.73639e-05	subtilisin [EC:3.4.21.62]
K01387	0	0	0	0	0	0	0	0	0	0	0.000277213	1.50446e-05	0	0.00235096	0.00167081	0	1.94652e-06	0	microbial collagenase [EC:3.4.24.3]
K01399	0	0	0	0	0	0	0	0	0	0	6.93031e-05	3.76115e-06	0	0.000587739	0.000417702	0	4.8663e-07	0	pseudolysin [EC:3.4.24.26]
K01406	0.000230072	0.000128153	3.86676e-05	0.000292347	0.000113739	2.08236e-05	2.08482e-05	2.434e-05	2.68584e-05	0	0.000100805	1.86078e-05	0.000161651	0	0	1.06604e-05	2.275e-05	2.09833e-05	serralysin [EC:3.4.24.40]
K01409	0.000827957	0.000839839	0.0008503	0.000820719	0.00084148	0.00085228	0.000852347	0.000852023	0.000857732	0.000854701	0.000856839	0.000852792	0.000836048	0.000894386	0.000897033	0.000853549	0.000852089	0.000856797	N6-L-threonylcarbamoyladenine synthase [EC:2.3.1.234]
K01424	0	0	0	0	0	0	0	0	0	0	6.93031e-05	3.76115e-06	0	0.000587739	0.000417702	0	4.8663e-07	0	L-asparaginase [EC:3.5.1.1]
K01433	0.000827957	0.000839839	0.0008503	0.000820719	0.00084148	0.00085228	0.000852347	0.000852023	0.000857732	0.000854701	0.000787536	0.000849031	0.000836048	0.000306647	0.000479331	0.000853549	0.000851603	0.000856797	formyltetrahydrofolate deformylase [EC:3.5.1.10]
K01436	0	2.88307e-07	7.75939e-07	0	0	0	5.71182e-07	1.2482e-06	5.06989e-05	0	7.56034e-05	0	1.13439e-06	0	0.000116409	7.18677e-07	0	3.73639e-05	amidohydrolase [EC:3.5.1.-]
K01438	0.000230072	0.000128153	3.86676e-05	0.000292347	0.000113739	2.08236e-05	2.08482e-05	2.434e-05	2.68584e-05	0	0.000100805	1.86078e-05	0.000161651	0	0	1.06604e-05	2.275e-05	2.09833e-05	acetylornithine deacetylase [EC:3.5.1.16]
K01439	0.000827957	0.000839839	0.0008503	0.000820719	0.00084148	0.00085228	0.000852347	0.000852023	0.000857732	0.000854701	0.000787536	0.000849031	0.000836048	0.000306647	0.000479331	0.000853549	0.000851603	0.000856797	succinyl-diaminopimelate desuccinylase [EC:3.5.1.18]
K01464	0.000827957	0.000839839	0.0008503	0.000820719	0.00084148	0.00085228	0.000852347	0.000852023	0.000857732	0.000854701	0.000787536	0.000849031	0.000836048	0.000306647	0.000479331	0.000853549	0.000851603	0.000856797	dihydropyrimidinase [EC:3.5.2.2]
K01465	0	0	0	0	0	0	0	0	0	0	6.93031e-05	3.76115e-06	0	0.000587739	0.000417702	0	4.8663e-07	0	dihydroorotase [EC:3.5.2.3]
K01468	0	0	0	0	0	0	0	0	0	0	6.93031e-05	3.76115e-06	0	0.000587739	0.000417702	0	4.8663e-07	0	imidazolonepropionase [EC:3.5.2.7]
K01470	0.000827957	0.000839839	0.0008503	0.000820719	0.00084148	0.00085228	0.000852347	0.000852023	0.000857732	0.000854701	0.000787536	0.000849031	0.000836048	0.000306647	0.000479331	0.000853549	0.000851603	0.000856797	creatinine amidohydrolase [EC:3.5.2.10]
K01479	0.000827957	0.000839551	0.000849524	0.000820719	0.00084148	0.00085228	0.000851776	0.000850775	0.000807033	0.000854701	0.000711932	0.000849031	0.000834914	0.000306647	0.000362922	0.00085283	0.000851603	0.000819433	formiminoglutamase [EC:3.5.3.8]
K01480	0.00105803	0.000967992	0.000888968	0.00111307	0.000955219	0.000873104	0.000873195	0.000876363	0.00088459	0.000854701	0.000957643	0.0008714	0.000997699	0.000894386	0.000897033	0.000864209	0.000874839	0.00087778	agmatinase [EC:3.5.3.11]
K01482	0	0	0	0	0	0	0	0	0	0	6.93031e-05	3.76115e-06	0	0.000587739	0.000417702	0	4.8663e-07	0	dimethylargininase [EC:3.5.3.18]
K01486	0.000827957	0.000839839	0.0008503	0.000820719	0.00084148	0.00085228	0.000852347	0.000852023	0.000857732	0.000854701	0.000787536	0.000849031	0.000836048	0.000306647	0.000479331	0.000853549	0.000851603	0.000856797	adenine deaminase [EC:3.5.4.2]
K01489	0.000597885	0.000711399	0.000810857	0.000528372	0.000727741	0.000831457	0.000830927	0.000826435	0.000780175	0.000854701	0.000611128	0.000830423	0.000673263	0.000306647	0.000362922	0.00084217	0.000828853	0.000798449	cytidine deaminase [EC:3.5.4.5]
K01491	0.000827957	0.000839839	0.0008503	0.000820719	0.00084148	0.00085228	0.000852347	0.000852023	0.000857732	0.000854701	0.000856839	0.000852792	0.000836048	0.000894386	0.000897033	0.000853549	0.000852089	0.000856797	methylenetetrahydrofolate dehydrogenase (NADP+) / methenyltetrahydrofolate cyclohydrolase [EC:1.5.1.5 3.5.4.9]
K01493	0.000827957	0.000839839	0.0008503	0.000820719	0.00084148	0.00085228	0.000852347	0.000852023	0.000857732	0.000854701	0.000856839	0.000852792	0.000836048	0.000894386	0.000897033	0.000853549	0.000852089	0.000856797	dCMP deaminase [EC:3.5.4.12]
K01495	0.000827957	0.000839839	0.0008503	0.000820719	0.00084148	0.00085228	0.000852347	0.000852023	0.000857732	0.000854701	0.000856839	0.000852792	0.000836048	0.000894386	0.000897033	0.000853549	0.000852089	0.000856797	GTP cyclohydrolase IA [EC:3.5.4.16]
K01496	0.000827957	0.000839839	0.0008503	0.000820719	0.00084148	0.00085228	0.000852347	0.000852023	0.000857732	0.000854701	0.000787536	0.000849031	0.000836048	0.000306647	0.000479331	0.000853549	0.000851603	0.000856797	phosphoribosyl-AMP cyclohydrolase [EC:3.5.4.19]
K01497	0	0	0	0	0	0	0	0	0	0	0.000138606	7.52231e-06	0	0.00117548	0.000835405	0	9.7326e-07	0	GTP cyclohydrolase II [EC:3.5.4.25]
K01507	0.000827957	0.000839551	0.000849524	0.000820719	0.00084148	0.00085228	0.000851776	0.000850775	0.000807033	0.000854701	0.000711932	0.000849031	0.000834914	0.000306647	0.000362922	0.00085283	0.000851603	0.000819433	inorganic pyrophosphatase [EC:3.6.1.1]
K01512	0.000827957	0.000839839	0.0008503	0.000820719	0.00084148	0.00085228	0.000852347	0.000852023	0.000857732	0.000854701	0.000787536	0.000849031	0.000836048	0.000306647	0.000479331	0.000853549	0.000851603	0.000856797	acylphosphatase [EC:3.6.1.7]
K01515	0.000827957	0.000839839	0.0008503	0.000820719	0.00084148	0.00085228	0.000852347	0.000852023	0.000857732	0.000854701	0.000856839	0.000852792	0.000836048	0.000894386	0.000897033	0.000853549	0.000852089	0.000856797	ADP-ribose pyrophosphatase [EC:3.6.1.13]
K01520	0	0	0	0	0	0	0	0	0	0	6.93031e-05	3.76115e-06	0	0.000587739	0.000417702	0	4.8663e-07	0	dUTP pyrophosphatase [EC:3.6.1.23]
K01533	0	0	0	0	0	0	0	0	0	0	0.000138606	7.52231e-06	0	0.00117548	0.000835405	0	9.7326e-07	0	Cu2+-exporting ATPase [EC:3.6.3.4]
K01534	0	0	0	0	0	0	0	0	0	0	6.93031e-05	3.76115e-06	0	0.000587739	0.000417702	0	4.8663e-07	0	Cd2+/Zn2+-exporting ATPase [EC:3.6.3.3 3.6.3.5]
K01535	0	0	0	0	0	0	0	0	0	0	6.93031e-05	3.76115e-06	0	0.000587739	0.000417702	0	4.8663e-07	0	H+-transporting ATPase [EC:3.6.3.6]
K01537	0	0	0	0	0	0	0	0	0	0	0.000138606	7.52231e-06	0	0.00117548	0.000835405	0	9.7326e-07	0	Ca2+-transporting ATPase [EC:3.6.3.8]
K01551	0	0	0	0	0	0	0	0	0	0	6.93031e-05	3.76115e-06	0	0.000587739	0.000417702	0	4.8663e-07	0	arsenite-transporting ATPase [EC:3.6.3.16]
K01563	0.000230072	0.000128153	3.86676e-05	0.000292347	0.000113739	2.08236e-05	2.08482e-05	2.434e-05	2.68584e-05	0	0.000100805	1.86078e-05	0.000161651	0	0	1.06604e-05	2.275e-05	2.09833e-05	haloalkane dehalogenase [EC:3.8.1.5]
K01571	0	0	0	0	0	0	0	0	0	0	6.93031e-05	3.76115e-06	0	0.000587739	0.000417702	0	4.8663e-07	0	oxaloacetate decarboxylase, alpha subunit [EC:4.1.1.3]
K01580	0	0	0	0	0	0	0	0	0	0	6.93031e-05	3.76115e-06	0	0.000587739	0.000417702	0	4.8663e-07	0	glutamate decarboxylase [EC:4.1.1.15]
K01588	0.000827957	0.000839839	0.0008503	0.000820719	0.00084148	0.00085228	0.000852347	0.000852023	0.000857732	0.000854701	0.000856839	0.000852792	0.000836048	0.000894386	0.000897033	0.000853549	0.000852089	0.000856797	5-(carboxyamino)imidazole ribonucleotide mutase [EC:5.4.99.18]
K01589	0.000827957	0.000839839	0.0008503	0.000820719	0.00084148	0.00085228	0.000852347	0.000852023	0.000857732	0.000854701	0.000787536	0.000849031	0.000836048	0.000306647	0.000479331	0.000853549	0.000851603	0.000856797	5-(carboxyamino)imidazole ribonucleotide synthase [EC:6.3.4.18]
K01591	0.000827957	0.000839839	0.0008503	0.000820719	0.00084148	0.00085228	0.000852347	0.000852023	0.000857732	0.000854701	0.000787536	0.000849031	0.000836048	0.000306647	0.000479331	0.000853549	0.000851603	0.000856797	orotidine-5-phosphate decarboxylase [EC:4.1.1.23]
K01594	0	0	0	0	0	0	0	0	0	0	6.93031e-05	3.76115e-06	0	0.000587739	0.000417702	0	4.8663e-07	0	sulfinoalanine decarboxylase [EC:4.1.1.29]
K01595	0	0	0	0	0	0	0	0	0	0	6.93031e-05	3.76115e-06	0	0.000587739	0.000417702	0	4.8663e-07	0	phosphoenolpyruvate carboxylase [EC:4.1.1.31]
K01609	0.000827957	0.000839839	0.0008503	0.000820719	0.00084148	0.00085228	0.000852347	0.000852023	0.000857732	0.000854701	0.000787536	0.000849031	0.000836048	0.000306647	0.000479331	0.000853549	0.000851603	0.000856797	indole-3-glycerol phosphate synthase [EC:4.1.1.48]
K01610	0.000827957	0.000839839	0.0008503	0.000820719	0.00084148	0.00085228	0.000852347	0.000852023	0.000857732	0.000854701	0.000856839	0.000852792	0.000836048	0.000894386	0.000897033	0.000853549	0.000852089	0.000856797	phosphoenolpyruvate carboxykinase (ATP) [EC:4.1.1.49]
K01613	0	0	0	0	0	0	0	0	0	0	6.93031e-05	3.76115e-06	0	0.000587739	0.000417702	0	4.8663e-07	0	phosphatidylserine decarboxylase [EC:4.1.1.65]
K01620	0	0	0	0	0	0	0	0	0	0	6.93031e-05	3.76115e-06	0	0.000587739	0.000417702	0	4.8663e-07	0	threonine aldolase [EC:4.1.2.48]
K01622	0.000827957	0.000839839	0.0008503	0.000820719	0.00084148	0.00085228	0.000852347	0.000852023	0.000857732	0.000854701	0.000787536	0.000849031	0.000836048	0.000306647	0.000479331	0.000853549	0.000851603	0.000856797	fructose 1,6-bisphosphate aldolase/phosphatase [EC:4.1.2.13 3.1.3.11]
K01641	0.000827957	0.000839839	0.0008503	0.000820719	0.00084148	0.00085228	0.000852347	0.000852023	0.000857732	0.000854701	0.000856839	0.000852792	0.000836048	0.000894386	0.000897033	0.000853549	0.000852089	0.000856797	hydroxymethylglutaryl-CoA synthase [EC:2.3.3.10]
K01644	0.000827957	0.000839839	0.0008503	0.000820719	0.00084148	0.00085228	0.000852347	0.000852023	0.000857732	0.000854701	0.000787536	0.000849031	0.000836048	0.000306647	0.000479331	0.000853549	0.000851603	0.000856797	citrate lyase subunit beta / citryl-CoA lyase [EC:4.1.3.34]
K01647	0.000827957	0.000839839	0.0008503	0.000820719	0.00084148	0.00085228	0.000852347	0.000852023	0.000857732	0.000854701	0.000856839	0.000852792	0.000836048	0.000894386	0.000897033	0.000853549	0.000852089	0.000856797	citrate synthase [EC:2.3.3.1]
K01649	0.0022538	0.00239108	0.00251146	0.00216981	0.0024107	0.00253602	0.00253562	0.00253048	0.00249564	0.0025641	0.0022555	0.00253225	0.00234536	0.00150768	0.00173929	0.00254927	0.00253254	0.00251204	2-isopropylmalate synthase [EC:2.3.3.13]
K01652	0.00105803	0.000967992	0.000888968	0.00111307	0.000955219	0.000873104	0.000873195	0.000876363	0.00088459	0.000854701	0.00088834	0.000867639	0.000997699	0.000306647	0.000479331	0.000864209	0.000874353	0.00087778	acetolactate synthase I/II/III large subunit [EC:2.2.1.6]
K01653	0.000827957	0.000839839	0.0008503	0.000820719	0.00084148	0.00085228	0.000852347	0.000852023	0.000857732	0.000854701	0.000787536	0.000849031	0.000836048	0.000306647	0.000479331	0.000853549	0.000851603	0.000856797	acetolactate synthase I/III small subunit [EC:2.2.1.6]
K01654	0.00142584	0.00155153	0.00166193	0.00134909	0.00156922	0.00168374	0.00168385	0.00167971	0.00168861	0.0017094	0.00147427	0.00167945	0.00151045	0.000613293	0.000958661	0.00169644	0.00168046	0.00169261	N-acetylneuraminate synthase [EC:2.5.1.56]
K01657	0.000827957	0.000839839	0.0008503	0.000820719	0.00084148	0.00085228	0.000852347	0.000852023	0.000857732	0.000854701	0.000856839	0.000852792	0.000836048	0.000894386	0.000897033	0.000853549	0.000852089	0.000856797	anthranilate synthase component I [EC:4.1.3.27]
K01658	0.000827957	0.000839839	0.0008503	0.000820719	0.00084148	0.00085228	0.000852347	0.000852023	0.000857732	0.000854701	0.000856839	0.000852792	0.000836048	0.000894386	0.000897033	0.000853549	0.000852089	0.000856797	anthranilate synthase component II [EC:4.1.3.27]
K01661	0	2.88307e-07	7.75939e-07	0	0	0	5.71182e-07	1.2482e-06	5.06989e-05	0	7.56034e-05	0	1.13439e-06	0	0.000116409	7.18677e-07	0	3.73639e-05	naphthoate synthase [EC:4.1.3.36]
K01662	0	2.88307e-07	7.75939e-07	0	0	0	5.71182e-07	1.2482e-06	5.06989e-05	0	7.56034e-05	0	1.13439e-06	0	0.000116409	7.18677e-07	0	3.73639e-05	1-deoxy-D-xylulose-5-phosphate synthase [EC:2.2.1.7]
K01664	0	2.88307e-07	7.75939e-07	0	0	0	5.71182e-07	1.2482e-06	5.06989e-05	0	7.56034e-05	0	1.13439e-06	0	0.000116409	7.18677e-07	0	3.73639e-05	para-aminobenzoate synthetase component II [EC:2.6.1.85]
K01665	0	2.88307e-07	7.75939e-07	0	0	0	5.71182e-07	1.2482e-06	5.06989e-05	0	0.000144907	3.76115e-06	1.13439e-06	0.000587739	0.000534111	7.18677e-07	4.8663e-07	3.73639e-05	para-aminobenzoate synthetase component I [EC:2.6.1.85]
K01666	0.000597885	0.000711399	0.000810857	0.000528372	0.000727741	0.000831457	0.000830927	0.000826435	0.000780175	0.000854701	0.000611128	0.000830423	0.000673263	0.000306647	0.000362922	0.00084217	0.000828853	0.000798449	4-hydroxy 2-oxovalerate aldolase [EC:4.1.3.39]
K01669	0.000230072	0.000128441	3.94436e-05	0.000292347	0.000113739	2.08236e-05	2.14193e-05	2.55882e-05	7.75573e-05	0	0.000315014	2.61301e-05	0.000162786	0.00117548	0.000951814	1.13791e-05	2.37232e-05	5.83472e-05	deoxyribodipyrimidine photo-lyase [EC:4.1.99.3]
K01674	0.00142584	0.00155095	0.00166038	0.00134909	0.00156922	0.00168374	0.0016827	0.00167721	0.00158721	0.0017094	0.00132306	0.00167945	0.00150818	0.000613293	0.000725843	0.001695	0.00168046	0.00161788	carbonic anhydrase [EC:4.2.1.1]
K01679	0.000827957	0.000839839	0.0008503	0.000820719	0.00084148	0.00085228	0.000852347	0.000852023	0.000857732	0.000854701	0.000856839	0.000852792	0.000836048	0.000894386	0.000897033	0.000853549	0.000852089	0.000856797	fumarate hydratase, class II [EC:4.2.1.2]
K01681	0.000827957	0.000839839	0.0008503	0.000820719	0.00084148	0.00085228	0.000852347	0.000852023	0.000857732	0.000854701	0.000856839	0.000852792	0.000836048	0.000894386	0.000897033	0.000853549	0.000852089	0.000856797	aconitate hydratase [EC:4.2.1.3]
K01687	0.000827957	0.000839839	0.0008503	0.000820719	0.00084148	0.00085228	0.000852347	0.000852023	0.000857732	0.000854701	0.000787536	0.000849031	0.000836048	0.000306647	0.000479331	0.000853549	0.000851603	0.000856797	dihydroxy-acid dehydratase [EC:4.2.1.9]
K01689	0.000827957	0.000839839	0.0008503	0.000820719	0.00084148	0.00085228	0.000852347	0.000852023	0.000857732	0.000854701	0.000856839	0.000852792	0.000836048	0.000894386	0.000897033	0.000853549	0.000852089	0.000856797	enolase [EC:4.2.1.11]
K01692	0.000827957	0.000839839	0.0008503	0.000820719	0.00084148	0.00085228	0.000852347	0.000852023	0.000857732	0.000854701	0.000926142	0.000856553	0.000836048	0.00148213	0.00131474	0.000853549	0.000852576	0.000856797	enoyl-CoA hydratase [EC:4.2.1.17]
K01693	0.000827957	0.000839839	0.0008503	0.000820719	0.00084148	0.00085228	0.000852347	0.000852023	0.000857732	0.000854701	0.000787536	0.000849031	0.000836048	0.000306647	0.000479331	0.000853549	0.000851603	0.000856797	imidazoleglycerol-phosphate dehydratase [EC:4.2.1.19]
K01695	0.000827957	0.000839839	0.0008503	0.000820719	0.00084148	0.00085228	0.000852347	0.000852023	0.000857732	0.000854701	0.000787536	0.000849031	0.000836048	0.000306647	0.000479331	0.000853549	0.000851603	0.000856797	tryptophan synthase alpha chain [EC:4.2.1.20]
K01696	0.000827957	0.000839839	0.0008503	0.000820719	0.00084148	0.00085228	0.000852347	0.000852023	0.000857732	0.000854701	0.000787536	0.000849031	0.000836048	0.000306647	0.000479331	0.000853549	0.000851603	0.000856797	tryptophan synthase beta chain [EC:4.2.1.20]
K01697	0.000827957	0.000839551	0.000849524	0.000820719	0.00084148	0.00085228	0.000851776	0.000850775	0.000807033	0.000854701	0.000850538	0.000856553	0.000834914	0.00148213	0.00119833	0.00085283	0.000852576	0.000819433	cystathionine beta-synthase [EC:4.2.1.22]
K01698	0.000827957	0.000839839	0.0008503	0.000820719	0.00084148	0.00085228	0.000852347	0.000852023	0.000857732	0.000854701	0.000787536	0.000849031	0.000836048	0.000306647	0.000479331	0.000853549	0.000851603	0.000856797	porphobilinogen synthase [EC:4.2.1.24]
K01703	0.00165591	0.00167968	0.0017006	0.00164144	0.00168296	0.00170456	0.00170469	0.00170405	0.00171546	0.0017094	0.00164437	0.00170182	0.0016721	0.00120103	0.00137636	0.0017071	0.00170369	0.00171359	3-isopropylmalate/(R)-2-methylmalate dehydratase large subunit [EC:4.2.1.33 4.2.1.35]
K01704	0.00165591	0.00167968	0.0017006	0.00164144	0.00168296	0.00170456	0.00170469	0.00170405	0.00171546	0.0017094	0.00157507	0.00169806	0.0016721	0.000613293	0.000958661	0.0017071	0.00170321	0.00171359	3-isopropylmalate/(R)-2-methylmalate dehydratase small subunit [EC:4.2.1.33 4.2.1.35]
K01709	0.000597885	0.000711399	0.000810857	0.000528372	0.000727741	0.000831457	0.000830927	0.000826435	0.000780175	0.000854701	0.000611128	0.000830423	0.000673263	0.000306647	0.000362922	0.00084217	0.000828853	0.000798449	CDP-glucose 4,6-dehydratase [EC:4.2.1.45]
K01710	0.000827957	0.000840128	0.000851076	0.000820719	0.00084148	0.00085228	0.000852918	0.000853271	0.000908431	0.000854701	0.000932442	0.000852792	0.000837183	0.000894386	0.00101344	0.000854268	0.000852089	0.00089416	dTDP-glucose 4,6-dehydratase [EC:4.2.1.46]
K01711	0.000827957	0.000839839	0.0008503	0.000820719	0.00084148	0.00085228	0.000852347	0.000852023	0.000857732	0.000854701	0.000856839	0.000852792	0.000836048	0.000894386	0.000897033	0.000853549	0.000852089	0.000856797	GDPmannose 4,6-dehydratase [EC:4.2.1.47]
K01712	0	0	0	0	0	0	0	0	0	0	6.93031e-05	3.76115e-06	0	0.000587739	0.000417702	0	4.8663e-07	0	urocanate hydratase [EC:4.2.1.49]
K01715	0.000827957	0.000839839	0.0008503	0.000820719	0.00084148	0.00085228	0.000852347	0.000852023	0.000857732	0.000854701	0.000995445	0.000860314	0.000836048	0.00206986	0.00173244	0.000853549	0.000853063	0.000856797	enoyl-CoA hydratase [EC:4.2.1.17]
K01719	0.000827957	0.000839839	0.0008503	0.000820719	0.00084148	0.00085228	0.000852347	0.000852023	0.000857732	0.000854701	0.000787536	0.000849031	0.000836048	0.000306647	0.000479331	0.000853549	0.000851603	0.000856797	uroporphyrinogen-III synthase [EC:4.2.1.75]
K01724	0.000827957	0.000839839	0.0008503	0.000820719	0.00084148	0.00085228	0.000852347	0.000852023	0.000857732	0.000854701	0.000856839	0.000852792	0.000836048	0.000894386	0.000897033	0.000853549	0.000852089	0.000856797	4a-hydroxytetrahydrobiopterin dehydratase [EC:4.2.1.96]
K01733	0.00165591	0.00167968	0.0017006	0.00164144	0.00168296	0.00170456	0.00170469	0.00170405	0.00171546	0.0017094	0.00157507	0.00169806	0.0016721	0.000613293	0.000958661	0.0017071	0.00170321	0.00171359	threonine synthase [EC:4.2.3.1]
K01736	0.000827957	0.000839839	0.0008503	0.000820719	0.00084148	0.00085228	0.000852347	0.000852023	0.000857732	0.000854701	0.000856839	0.000852792	0.000836048	0.000894386	0.000897033	0.000853549	0.000852089	0.000856797	chorismate synthase [EC:4.2.3.5]
K01737	0.000827957	0.000839839	0.0008503	0.000820719	0.00084148	0.00085228	0.000852347	0.000852023	0.000857732	0.000854701	0.000856839	0.000852792	0.000836048	0.000894386	0.000897033	0.000853549	0.000852089	0.000856797	6-pyruvoyltetrahydropterin/6-carboxytetrahydropterin synthase [EC:4.2.3.12 4.1.2.50]
K01738	0.00165591	0.00167939	0.00169982	0.00164144	0.00168296	0.00170456	0.00170412	0.0017028	0.00166477	0.0017094	0.00156877	0.00170182	0.00167096	0.00120103	0.00125995	0.00170638	0.00170369	0.00167623	cysteine synthase A [EC:2.5.1.47]
K01739	0	0	0	0	0	0	0	0	0	0	0.000138606	7.52231e-06	0	0.00117548	0.000835405	0	9.7326e-07	0	cystathionine gamma-synthase [EC:2.5.1.48]
K01740	0.000597885	0.000711399	0.000810857	0.000528372	0.000727741	0.000831457	0.000830927	0.000826435	0.000780175	0.000854701	0.000749734	0.000837945	0.000673263	0.00148213	0.00119833	0.00084217	0.000829826	0.000798449	O-acetylhomoserine (thiol)-lyase [EC:2.5.1.49]
K01744	0.000827957	0.000839839	0.0008503	0.000820719	0.00084148	0.00085228	0.000852347	0.000852023	0.000857732	0.000854701	0.000856839	0.000852792	0.000836048	0.000894386	0.000897033	0.000853549	0.000852089	0.000856797	aspartate ammonia-lyase [EC:4.3.1.1]
K01745	0	0	0	0	0	0	0	0	0	0	6.93031e-05	3.76115e-06	0	0.000587739	0.000417702	0	4.8663e-07	0	histidine ammonia-lyase [EC:4.3.1.3]
K01749	0.00105803	0.000967992	0.000888968	0.00111307	0.000955219	0.000873104	0.000873195	0.000876363	0.00088459	0.000854701	0.00088834	0.000867639	0.000997699	0.000306647	0.000479331	0.000864209	0.000874353	0.00087778	hydroxymethylbilane synthase [EC:2.5.1.61]
K01754	0.000827957	0.000839839	0.0008503	0.000820719	0.00084148	0.00085228	0.000852347	0.000852023	0.000857732	0.000854701	0.000787536	0.000849031	0.000836048	0.000306647	0.000479331	0.000853549	0.000851603	0.000856797	threonine dehydratase [EC:4.3.1.19]
K01755	0.000827957	0.000839839	0.0008503	0.000820719	0.00084148	0.00085228	0.000852347	0.000852023	0.000857732	0.000854701	0.000787536	0.000849031	0.000836048	0.000306647	0.000479331	0.000853549	0.000851603	0.000856797	argininosuccinate lyase [EC:4.3.2.1]
K01756	0.000827957	0.000839839	0.0008503	0.000820719	0.00084148	0.00085228	0.000852347	0.000852023	0.000857732	0.000854701	0.000856839	0.000852792	0.000836048	0.000894386	0.000897033	0.000853549	0.000852089	0.000856797	adenylosuccinate lyase [EC:4.3.2.2]
K01758	0	0	0	0	0	0	0	0	0	0	0.000138606	7.52231e-06	0	0.00117548	0.000835405	0	9.7326e-07	0	cystathionine gamma-lyase [EC:4.4.1.1]
K01759	0.00165591	0.00167939	0.00169982	0.00164144	0.00168296	0.00170456	0.00170412	0.0017028	0.00166477	0.0017094	0.00149947	0.00169806	0.00167096	0.000613293	0.000842252	0.00170638	0.00170321	0.00167623	lactoylglutathione lyase [EC:4.4.1.5]
K01760	0	0	0	0	0	0	0	0	0	0	0.000138606	7.52231e-06	0	0.00117548	0.000835405	0	9.7326e-07	0	cystathionine beta-lyase [EC:4.4.1.8]
K01761	0	0	0	0	0	0	0	0	0	0	0.000138606	7.52231e-06	0	0.00117548	0.000835405	0	9.7326e-07	0	methionine-gamma-lyase [EC:4.4.1.11]
K01768	0.00211606	0.0019357	0.00177716	0.00222613	0.00191044	0.00174621	0.00174582	0.00175148	0.00171848	0.0017094	0.00170108	0.00173528	0.00199426	0.000613293	0.000842252	0.0017277	0.00174871	0.0017182	adenylate cyclase [EC:4.6.1.1]
K01776	0.000827957	0.000839839	0.0008503	0.000820719	0.00084148	0.00085228	0.000852347	0.000852023	0.000857732	0.000854701	0.000787536	0.000849031	0.000836048	0.000306647	0.000479331	0.000853549	0.000851603	0.000856797	glutamate racemase [EC:5.1.1.3]
K01778	0	2.88307e-07	7.75939e-07	0	0	0	5.71182e-07	1.2482e-06	5.06989e-05	0	7.56034e-05	0	1.13439e-06	0	0.000116409	7.18677e-07	0	3.73639e-05	diaminopimelate epimerase [EC:5.1.1.7]
K01782	0.000230072	0.000128441	3.94436e-05	0.000292347	0.000113739	2.08236e-05	2.14193e-05	2.55882e-05	7.75573e-05	0	0.000245711	2.2369e-05	0.000162786	0.000587739	0.000534111	1.13791e-05	2.32366e-05	5.83472e-05	3-hydroxyacyl-CoA dehydrogenase / enoyl-CoA hydratase / 3-hydroxybutyryl-CoA epimerase [EC:1.1.1.35 4.2.1.17 5.1.2.3]
K01783	0.000230072	0.000128153	3.86676e-05	0.000292347	0.000113739	2.08236e-05	2.08482e-05	2.434e-05	2.68584e-05	0	0.000170108	2.2369e-05	0.000161651	0.000587739	0.000417702	1.06604e-05	2.32366e-05	2.09833e-05	ribulose-phosphate 3-epimerase [EC:5.1.3.1]
K01784	0.00331183	0.00335907	0.00340043	0.00328287	0.00336592	0.00340912	0.00340882	0.00340684	0.00338023	0.0034188	0.00328245	0.00340741	0.00334306	0.0029898	0.00305402	0.00341348	0.00340787	0.00338982	UDP-glucose 4-epimerase [EC:5.1.3.2]
K01790	0.000827957	0.000839839	0.0008503	0.000820719	0.00084148	0.00085228	0.000852347	0.000852023	0.000857732	0.000854701	0.000787536	0.000849031	0.000836048	0.000306647	0.000479331	0.000853549	0.000851603	0.000856797	dTDP-4-dehydrorhamnose 3,5-epimerase [EC:5.1.3.13]
K01791	0.000230072	0.000128153	3.86676e-05	0.000292347	0.000113739	2.08236e-05	2.08482e-05	2.434e-05	2.68584e-05	0	0.000100805	1.86078e-05	0.000161651	0	0	1.06604e-05	2.275e-05	2.09833e-05	UDP-N-acetylglucosamine 2-epimerase (non-hydrolysing) [EC:5.1.3.14]
K01802	0.00165591	0.00167939	0.00169982	0.00164144	0.00168296	0.00170456	0.00170412	0.0017028	0.00166477	0.0017094	0.00163807	0.00170558	0.00167096	0.00178877	0.00167766	0.00170638	0.00170418	0.00167623	peptidylprolyl isomerase [EC:5.2.1.8]
K01803	0.000827957	0.000839839	0.0008503	0.000820719	0.00084148	0.00085228	0.000852347	0.000852023	0.000857732	0.000854701	0.000856839	0.000852792	0.000836048	0.000894386	0.000897033	0.000853549	0.000852089	0.000856797	triosephosphate isomerase (TIM) [EC:5.3.1.1]
K01807	0.000827957	0.000839839	0.0008503	0.000820719	0.00084148	0.00085228	0.000852347	0.000852023	0.000857732	0.000854701	0.000856839	0.000852792	0.000836048	0.000894386	0.000897033	0.000853549	0.000852089	0.000856797	ribose 5-phosphate isomerase A [EC:5.3.1.6]
K01814	0.000827957	0.000839839	0.0008503	0.000820719	0.00084148	0.00085228	0.000852347	0.000852023	0.000857732	0.000854701	0.000787536	0.000849031	0.000836048	0.000306647	0.000479331	0.000853549	0.000851603	0.000856797	phosphoribosylformimino-5-aminoimidazole carboxamide ribotide isomerase [EC:5.3.1.16]
K01821	0.000827957	0.000839839	0.0008503	0.000820719	0.00084148	0.00085228	0.000852347	0.000852023	0.000857732	0.000854701	0.000787536	0.000849031	0.000836048	0.000306647	0.000479331	0.000853549	0.000851603	0.000856797	4-oxalocrotonate tautomerase [EC:5.3.2.6]
K01823	0.000827957	0.000839839	0.0008503	0.000820719	0.00084148	0.00085228	0.000852347	0.000852023	0.000857732	0.000854701	0.000856839	0.000852792	0.000836048	0.000894386	0.000897033	0.000853549	0.000852089	0.000856797	isopentenyl-diphosphate Delta-isomerase [EC:5.3.3.2]
K01825	0.000827957	0.000839551	0.000849524	0.000820719	0.00084148	0.00085228	0.000851776	0.000850775	0.000807033	0.000854701	0.000781235	0.000852792	0.000834914	0.000894386	0.000780624	0.00085283	0.000852089	0.000819433	3-hydroxyacyl-CoA dehydrogenase / enoyl-CoA hydratase / 3-hydroxybutyryl-CoA epimerase / enoyl-CoA isomerase [EC:1.1.1.35 4.2.1.17 5.1.2.3 5.3.3.8]
K01834	0	0	0	0	0	0	0	0	0	0	6.93031e-05	3.76115e-06	0	0.000587739	0.000417702	0	4.8663e-07	0	2,3-bisphosphoglycerate-dependent phosphoglycerate mutase [EC:5.4.2.11]
K01840	0.000827957	0.000839839	0.0008503	0.000820719	0.00084148	0.00085228	0.000852347	0.000852023	0.000857732	0.000854701	0.000856839	0.000852792	0.000836048	0.000894386	0.000897033	0.000853549	0.000852089	0.000856797	phosphomannomutase [EC:5.4.2.8]
K01841	0.00142584	0.00155124	0.00166116	0.00134909	0.00156922	0.00168374	0.00168327	0.00167846	0.00163791	0.0017094	0.00139866	0.00167945	0.00150931	0.000613293	0.000842252	0.00169572	0.00168046	0.00165525	phosphoenolpyruvate phosphomutase [EC:5.4.2.9]
K01845	0.00308176	0.00323063	0.00336098	0.00299053	0.00325218	0.0033883	0.0033874	0.00338126	0.00330267	0.0034188	0.00289813	0.00337751	0.00318027	0.00122659	0.0016845	0.0034021	0.00338366	0.00333148	glutamate-1-semialdehyde 2,1-aminomutase [EC:5.4.3.8]
K01847	0.000827957	0.000839839	0.0008503	0.000820719	0.00084148	0.00085228	0.000852347	0.000852023	0.000857732	0.000854701	0.000856839	0.000852792	0.000836048	0.000894386	0.000897033	0.000853549	0.000852089	0.000856797	methylmalonyl-CoA mutase [EC:5.4.99.2]
K01848	0.000827957	0.000839839	0.0008503	0.000820719	0.00084148	0.00085228	0.000852347	0.000852023	0.000857732	0.000854701	0.000856839	0.000852792	0.000836048	0.000894386	0.000897033	0.000853549	0.000852089	0.000856797	methylmalonyl-CoA mutase, N-terminal domain [EC:5.4.99.2]
K01849	0.000827957	0.000839839	0.0008503	0.000820719	0.00084148	0.00085228	0.000852347	0.000852023	0.000857732	0.000854701	0.000856839	0.000852792	0.000836048	0.000894386	0.000897033	0.000853549	0.000852089	0.000856797	methylmalonyl-CoA mutase, C-terminal domain [EC:5.4.99.2]
K01857	0	0	0	0	0	0	0	0	0	0	6.93031e-05	3.76115e-06	0	0.000587739	0.000417702	0	4.8663e-07	0	3-carboxy-cis,cis-muconate cycloisomerase [EC:5.5.1.2]
K01858	0.000827957	0.000839839	0.0008503	0.000820719	0.00084148	0.00085228	0.000852347	0.000852023	0.000857732	0.000854701	0.000787536	0.000849031	0.000836048	0.000306647	0.000479331	0.000853549	0.000851603	0.000856797	myo-inositol-1-phosphate synthase [EC:5.5.1.4]
K01866	0.00105803	0.000967992	0.000888968	0.00111307	0.000955219	0.000873104	0.000873195	0.000876363	0.00088459	0.000854701	0.000957643	0.0008714	0.000997699	0.000894386	0.000897033	0.000864209	0.000874839	0.00087778	tyrosyl-tRNA synthetase [EC:6.1.1.1]
K01867	0.000827957	0.000839839	0.0008503	0.000820719	0.00084148	0.00085228	0.000852347	0.000852023	0.000857732	0.000854701	0.000856839	0.000852792	0.000836048	0.000894386	0.000897033	0.000853549	0.000852089	0.000856797	tryptophanyl-tRNA synthetase [EC:6.1.1.2]
K01868	0.000827957	0.000839839	0.0008503	0.000820719	0.00084148	0.00085228	0.000852347	0.000852023	0.000857732	0.000854701	0.000856839	0.000852792	0.000836048	0.000894386	0.000897033	0.000853549	0.000852089	0.000856797	threonyl-tRNA synthetase [EC:6.1.1.3]
K01869	0.000827957	0.000839839	0.0008503	0.000820719	0.00084148	0.00085228	0.000852347	0.000852023	0.000857732	0.000854701	0.000856839	0.000852792	0.000836048	0.000894386	0.000897033	0.000853549	0.000852089	0.000856797	leucyl-tRNA synthetase [EC:6.1.1.4]
K01870	0.000827957	0.000839839	0.0008503	0.000820719	0.00084148	0.00085228	0.000852347	0.000852023	0.000857732	0.000854701	0.000856839	0.000852792	0.000836048	0.000894386	0.000897033	0.000853549	0.000852089	0.000856797	isoleucyl-tRNA synthetase [EC:6.1.1.5]
K01872	0.000827957	0.000839839	0.0008503	0.000820719	0.00084148	0.00085228	0.000852347	0.000852023	0.000857732	0.000854701	0.000926142	0.000856553	0.000836048	0.00148213	0.00131474	0.000853549	0.000852576	0.000856797	alanyl-tRNA synthetase [EC:6.1.1.7]
K01873	0.000827957	0.000839839	0.0008503	0.000820719	0.00084148	0.00085228	0.000852347	0.000852023	0.000857732	0.000854701	0.000856839	0.000852792	0.000836048	0.000894386	0.000897033	0.000853549	0.000852089	0.000856797	valyl-tRNA synthetase [EC:6.1.1.9]
K01874	0.00105803	0.00096828	0.000889744	0.00111307	0.000955219	0.000873104	0.000873766	0.000877611	0.000935289	0.000854701	0.00103325	0.0008714	0.000998834	0.000894386	0.00101344	0.000864928	0.000874839	0.000915144	methionyl-tRNA synthetase [EC:6.1.1.10]
K01875	0.000827957	0.000839839	0.0008503	0.000820719	0.00084148	0.00085228	0.000852347	0.000852023	0.000857732	0.000854701	0.000856839	0.000852792	0.000836048	0.000894386	0.000897033	0.000853549	0.000852089	0.000856797	seryl-tRNA synthetase [EC:6.1.1.11]
K01876	0.00165591	0.00167968	0.0017006	0.00164144	0.00168296	0.00170456	0.00170469	0.00170405	0.00171546	0.0017094	0.00171368	0.00170558	0.0016721	0.00178877	0.00179407	0.0017071	0.00170418	0.00171359	aspartyl-tRNA synthetase [EC:6.1.1.12]
K01880	0.000827957	0.000839839	0.0008503	0.000820719	0.00084148	0.00085228	0.000852347	0.000852023	0.000857732	0.000854701	0.000856839	0.000852792	0.000836048	0.000894386	0.000897033	0.000853549	0.000852089	0.000856797	glycyl-tRNA synthetase [EC:6.1.1.14]
K01881	0.000827957	0.000839839	0.0008503	0.000820719	0.00084148	0.00085228	0.000852347	0.000852023	0.000857732	0.000854701	0.000856839	0.000852792	0.000836048	0.000894386	0.000897033	0.000853549	0.000852089	0.000856797	prolyl-tRNA synthetase [EC:6.1.1.15]
K01883	0.000827957	0.000839839	0.0008503	0.000820719	0.00084148	0.00085228	0.000852347	0.000852023	0.000857732	0.000854701	0.000856839	0.000852792	0.000836048	0.000894386	0.000897033	0.000853549	0.000852089	0.000856797	cysteinyl-tRNA synthetase [EC:6.1.1.16]
K01885	0.000827957	0.000839839	0.0008503	0.000820719	0.00084148	0.00085228	0.000852347	0.000852023	0.000857732	0.000854701	0.000856839	0.000852792	0.000836048	0.000894386	0.000897033	0.000853549	0.000852089	0.000856797	glutamyl-tRNA synthetase [EC:6.1.1.17]
K01886	0.000827957	0.000839839	0.0008503	0.000820719	0.00084148	0.00085228	0.000852347	0.000852023	0.000857732	0.000854701	0.000856839	0.000852792	0.000836048	0.000894386	0.000897033	0.000853549	0.000852089	0.000856797	glutaminyl-tRNA synthetase [EC:6.1.1.18]
K01887	0.000827957	0.000839839	0.0008503	0.000820719	0.00084148	0.00085228	0.000852347	0.000852023	0.000857732	0.000854701	0.000856839	0.000852792	0.000836048	0.000894386	0.000897033	0.000853549	0.000852089	0.000856797	arginyl-tRNA synthetase [EC:6.1.1.19]
K01889	0.000827957	0.000839839	0.0008503	0.000820719	0.00084148	0.00085228	0.000852347	0.000852023	0.000857732	0.000854701	0.000856839	0.000852792	0.000836048	0.000894386	0.000897033	0.000853549	0.000852089	0.000856797	phenylalanyl-tRNA synthetase alpha chain [EC:6.1.1.20]
K01890	0.000827957	0.000839839	0.0008503	0.000820719	0.00084148	0.00085228	0.000852347	0.000852023	0.000857732	0.000854701	0.000856839	0.000852792	0.000836048	0.000894386	0.000897033	0.000853549	0.000852089	0.000856797	phenylalanyl-tRNA synthetase beta chain [EC:6.1.1.20]
K01892	0.000827957	0.000839839	0.0008503	0.000820719	0.00084148	0.00085228	0.000852347	0.000852023	0.000857732	0.000854701	0.000856839	0.000852792	0.000836048	0.000894386	0.000897033	0.000853549	0.000852089	0.000856797	histidyl-tRNA synthetase [EC:6.1.1.21]
K01893	0	0	0	0	0	0	0	0	0	0	6.93031e-05	3.76115e-06	0	0.000587739	0.000417702	0	4.8663e-07	0	asparaginyl-tRNA synthetase [EC:6.1.1.22]
K01895	0.00165591	0.00167939	0.00169982	0.00164144	0.00168296	0.00170456	0.00170412	0.0017028	0.00166477	0.0017094	0.00149947	0.00169806	0.00167096	0.000613293	0.000842252	0.00170638	0.00170321	0.00167623	acetyl-CoA synthetase [EC:6.2.1.1]
K01897	0.000827957	0.000839551	0.000849524	0.000820719	0.00084148	0.00085228	0.000851776	0.000850775	0.000807033	0.000854701	0.000781235	0.000852792	0.000834914	0.000894386	0.000780624	0.00085283	0.000852089	0.000819433	long-chain acyl-CoA synthetase [EC:6.2.1.3]
K01902	0.000827957	0.000839839	0.0008503	0.000820719	0.00084148	0.00085228	0.000852347	0.000852023	0.000857732	0.000854701	0.000856839	0.000852792	0.000836048	0.000894386	0.000897033	0.000853549	0.000852089	0.000856797	succinyl-CoA synthetase alpha subunit [EC:6.2.1.5]
K01903	0.000827957	0.000839839	0.0008503	0.000820719	0.00084148	0.00085228	0.000852347	0.000852023	0.000857732	0.000854701	0.000856839	0.000852792	0.000836048	0.000894386	0.000897033	0.000853549	0.000852089	0.000856797	succinyl-CoA synthetase beta subunit [EC:6.2.1.5]
K01905	0.000827957	0.000840128	0.000851076	0.000820719	0.00084148	0.00085228	0.000852918	0.000853271	0.000908431	0.000854701	0.000863139	0.000849031	0.000837183	0.000306647	0.000595739	0.000854268	0.000851603	0.00089416	acetyl-CoA synthetase (ADP-forming) [EC:6.2.1.13]
K01908	0.00105803	0.000967992	0.000888968	0.00111307	0.000955219	0.000873104	0.000873195	0.000876363	0.00088459	0.000854701	0.00088834	0.000867639	0.000997699	0.000306647	0.000479331	0.000864209	0.000874353	0.00087778	propionyl-CoA synthetase [EC:6.2.1.17]
K01915	0.00165591	0.00167939	0.00169982	0.00164144	0.00168296	0.00170456	0.00170412	0.0017028	0.00166477	0.0017094	0.00156877	0.00170182	0.00167096	0.00120103	0.00125995	0.00170638	0.00170369	0.00167623	glutamine synthetase [EC:6.3.1.2]
K01916	0.00105803	0.000967992	0.000888968	0.00111307	0.000955219	0.000873104	0.000873195	0.000876363	0.00088459	0.000854701	0.000957643	0.0008714	0.000997699	0.000894386	0.000897033	0.000864209	0.000874839	0.00087778	NAD+ synthase [EC:6.3.1.5]
K01919	0	0	0	0	0	0	0	0	0	0	6.93031e-05	3.76115e-06	0	0.000587739	0.000417702	0	4.8663e-07	0	glutamate--cysteine ligase [EC:6.3.2.2]
K01921	0.000827957	0.000839551	0.000849524	0.000820719	0.00084148	0.00085228	0.000851776	0.000850775	0.000807033	0.000854701	0.000711932	0.000849031	0.000834914	0.000306647	0.000362922	0.00085283	0.000851603	0.000819433	D-alanine-D-alanine ligase [EC:6.3.2.4]
K01923	0.00105803	0.000967992	0.000888968	0.00111307	0.000955219	0.000873104	0.000873195	0.000876363	0.00088459	0.000854701	0.000957643	0.0008714	0.000997699	0.000894386	0.000897033	0.000864209	0.000874839	0.00087778	phosphoribosylaminoimidazole-succinocarboxamide synthase [EC:6.3.2.6]
K01933	0.000827957	0.000839839	0.0008503	0.000820719	0.00084148	0.00085228	0.000852347	0.000852023	0.000857732	0.000854701	0.000856839	0.000852792	0.000836048	0.000894386	0.000897033	0.000853549	0.000852089	0.000856797	phosphoribosylformylglycinamidine cyclo-ligase [EC:6.3.3.1]
K01934	0.000827957	0.000839839	0.0008503	0.000820719	0.00084148	0.00085228	0.000852347	0.000852023	0.000857732	0.000854701	0.000787536	0.000849031	0.000836048	0.000306647	0.000479331	0.000853549	0.000851603	0.000856797	5-formyltetrahydrofolate cyclo-ligase [EC:6.3.3.2]
K01935	0.000827957	0.000839839	0.0008503	0.000820719	0.00084148	0.00085228	0.000852347	0.000852023	0.000857732	0.000854701	0.000787536	0.000849031	0.000836048	0.000306647	0.000479331	0.000853549	0.000851603	0.000856797	dethiobiotin synthetase [EC:6.3.3.3]
K01937	0.000827957	0.000839839	0.0008503	0.000820719	0.00084148	0.00085228	0.000852347	0.000852023	0.000857732	0.000854701	0.000856839	0.000852792	0.000836048	0.000894386	0.000897033	0.000853549	0.000852089	0.000856797	CTP synthase [EC:6.3.4.2]
K01938	0	0	0	0	0	0	0	0	0	0	6.93031e-05	3.76115e-06	0	0.000587739	0.000417702	0	4.8663e-07	0	formate--tetrahydrofolate ligase [EC:6.3.4.3]
K01939	0.000827957	0.000839839	0.0008503	0.000820719	0.00084148	0.00085228	0.000852347	0.000852023	0.000857732	0.000854701	0.000856839	0.000852792	0.000836048	0.000894386	0.000897033	0.000853549	0.000852089	0.000856797	adenylosuccinate synthase [EC:6.3.4.4]
K01940	0.000827957	0.000839839	0.0008503	0.000820719	0.00084148	0.00085228	0.000852347	0.000852023	0.000857732	0.000854701	0.000787536	0.000849031	0.000836048	0.000306647	0.000479331	0.000853549	0.000851603	0.000856797	argininosuccinate synthase [EC:6.3.4.5]
K01941	0	0	0	0	0	0	0	0	0	0	6.93031e-05	3.76115e-06	0	0.000587739	0.000417702	0	4.8663e-07	0	urea carboxylase [EC:6.3.4.6]
K01945	0.000827957	0.000839839	0.0008503	0.000820719	0.00084148	0.00085228	0.000852347	0.000852023	0.000857732	0.000854701	0.000856839	0.000852792	0.000836048	0.000894386	0.000897033	0.000853549	0.000852089	0.000856797	phosphoribosylamine---glycine ligase [EC:6.3.4.13]
K01950	0	0	0	0	0	0	0	0	0	0	6.93031e-05	3.76115e-06	0	0.000587739	0.000417702	0	4.8663e-07	0	NAD+ synthase (glutamine-hydrolysing) [EC:6.3.5.1]
K01951	0.00248387	0.00251923	0.00255013	0.00246216	0.00252444	0.00255684	0.00255647	0.00255482	0.0025225	0.0025641	0.00242561	0.00255461	0.00250701	0.00209542	0.00215699	0.00255993	0.00255578	0.00253303	GMP synthase (glutamine-hydrolysing) [EC:6.3.5.2]
K01952	0.00248387	0.00251952	0.0025509	0.00246216	0.00252444	0.00255684	0.00255704	0.00255607	0.0025732	0.0025641	0.00250121	0.00255461	0.00250814	0.00209542	0.0022734	0.00256065	0.00255578	0.00257039	phosphoribosylformylglycinamidine synthase [EC:6.3.5.3]
K01953	0.00165591	0.00167997	0.00170138	0.00164144	0.00168296	0.00170456	0.00170526	0.00170529	0.00176616	0.0017094	0.00171998	0.00170182	0.00167323	0.00120103	0.00149277	0.00170782	0.00170369	0.00175096	asparagine synthase (glutamine-hydrolysing) [EC:6.3.5.4]
K01955	0.00142584	0.00155124	0.00166116	0.00134909	0.00156922	0.00168374	0.00168327	0.00167846	0.00163791	0.0017094	0.00146797	0.00168321	0.00150931	0.00120103	0.00125995	0.00169572	0.00168094	0.00165525	carbamoyl-phosphate synthase large subunit [EC:6.3.5.5]
K01956	0.000827957	0.000839839	0.0008503	0.000820719	0.00084148	0.00085228	0.000852347	0.000852023	0.000857732	0.000854701	0.000856839	0.000852792	0.000836048	0.000894386	0.000897033	0.000853549	0.000852089	0.000856797	carbamoyl-phosphate synthase small subunit [EC:6.3.5.5]
K01958	0.000230072	0.000128441	3.94436e-05	0.000292347	0.000113739	2.08236e-05	2.14193e-05	2.55882e-05	7.75573e-05	0	0.000315014	2.61301e-05	0.000162786	0.00117548	0.000951814	1.13791e-05	2.37232e-05	5.83472e-05	pyruvate carboxylase [EC:6.4.1.1]
K01959	0.000827957	0.000839839	0.0008503	0.000820719	0.00084148	0.00085228	0.000852347	0.000852023	0.000857732	0.000854701	0.000926142	0.000856553	0.000836048	0.00148213	0.00131474	0.000853549	0.000852576	0.000856797	pyruvate carboxylase subunit A [EC:6.4.1.1]
K01960	0	0	0	0	0	0	0	0	0	0	6.93031e-05	3.76115e-06	0	0.000587739	0.000417702	0	4.8663e-07	0	pyruvate carboxylase subunit B [EC:6.4.1.1]
K01961	0.000827957	0.000839839	0.0008503	0.000820719	0.00084148	0.00085228	0.000852347	0.000852023	0.000857732	0.000854701	0.000926142	0.000856553	0.000836048	0.00148213	0.00131474	0.000853549	0.000852576	0.000856797	acetyl-CoA carboxylase, biotin carboxylase subunit [EC:6.4.1.2 6.3.4.14]
K01962	0	2.88307e-07	7.75939e-07	0	0	0	5.71182e-07	1.2482e-06	5.06989e-05	0	7.56034e-05	0	1.13439e-06	0	0.000116409	7.18677e-07	0	3.73639e-05	acetyl-CoA carboxylase carboxyl transferase subunit alpha [EC:6.4.1.2]
K01965	0.000827957	0.000839839	0.0008503	0.000820719	0.00084148	0.00085228	0.000852347	0.000852023	0.000857732	0.000854701	0.00106475	0.000864075	0.000836048	0.0026576	0.00215014	0.000853549	0.000853549	0.000856797	propionyl-CoA carboxylase alpha chain [EC:6.4.1.3]
K01966	0.000827957	0.000839839	0.0008503	0.000820719	0.00084148	0.00085228	0.000852347	0.000852023	0.000857732	0.000854701	0.000926142	0.000856553	0.000836048	0.00148213	0.00131474	0.000853549	0.000852576	0.000856797	propionyl-CoA carboxylase beta chain [EC:6.4.1.3]
K01968	0.000827957	0.000839839	0.0008503	0.000820719	0.00084148	0.00085228	0.000852347	0.000852023	0.000857732	0.000854701	0.000995445	0.000860314	0.000836048	0.00206986	0.00173244	0.000853549	0.000853063	0.000856797	3-methylcrotonyl-CoA carboxylase alpha subunit [EC:6.4.1.4]
K01969	0	0	0	0	0	0	0	0	0	0	0.000138606	7.52231e-06	0	0.00117548	0.000835405	0	9.7326e-07	0	3-methylcrotonyl-CoA carboxylase beta subunit [EC:6.4.1.4]
K01972	0	0	0	0	0	0	0	0	0	0	6.93031e-05	3.76115e-06	0	0.000587739	0.000417702	0	4.8663e-07	0	DNA ligase (NAD+) [EC:6.5.1.2]
K01974	0.000827957	0.000839551	0.000849524	0.000820719	0.00084148	0.00085228	0.000851776	0.000850775	0.000807033	0.000854701	0.000711932	0.000849031	0.000834914	0.000306647	0.000362922	0.00085283	0.000851603	0.000819433	RNA 3-terminal phosphate cyclase (ATP) [EC:6.5.1.4]
K01975	0.000827957	0.000839839	0.0008503	0.000820719	0.00084148	0.00085228	0.000852347	0.000852023	0.000857732	0.000854701	0.000787536	0.000849031	0.000836048	0.000306647	0.000479331	0.000853549	0.000851603	0.000856797	2-5 RNA ligase [EC:6.5.1.-]
K01989	0.000230072	0.000128153	3.86676e-05	0.000292347	0.000113739	2.08236e-05	2.08482e-05	2.434e-05	2.68584e-05	0	0.000100805	1.86078e-05	0.000161651	0	0	1.06604e-05	2.275e-05	2.09833e-05	putative ABC transport system substrate-binding protein
K01990	0.00211606	0.00193627	0.00177871	0.00222613	0.00191044	0.00174621	0.00174696	0.00175397	0.00181988	0.0017094	0.00268392	0.00178041	0.00199653	0.00766616	0.0060875	0.00172914	0.00175454	0.00179292	ABC-2 type transport system ATP-binding protein
K01992	0.00165591	0.00167968	0.0017006	0.00164144	0.00168296	0.00170456	0.00170469	0.00170405	0.00171546	0.0017094	0.00157507	0.00169806	0.0016721	0.000613293	0.000958661	0.0017071	0.00170321	0.00171359	ABC-2 type transport system permease protein
K01995	0.000827957	0.000840128	0.000851076	0.000820719	0.00084148	0.00085228	0.000852918	0.000853271	0.000908431	0.000854701	0.00114035	0.000864075	0.000837183	0.0026576	0.00226655	0.000854268	0.000853549	0.00089416	branched-chain amino acid transport system ATP-binding protein
K01996	0.000597885	0.000711687	0.000811633	0.000528372	0.000727741	0.000831457	0.000831499	0.000827683	0.000830874	0.000854701	0.000825337	0.000837945	0.000674397	0.00148213	0.00131474	0.000842889	0.000829826	0.000835813	branched-chain amino acid transport system ATP-binding protein
K01998	0	0	0	0	0	0	0	0	0	0	6.93031e-05	3.76115e-06	0	0.000587739	0.000417702	0	4.8663e-07	0	branched-chain amino acid transport system permease protein
K02003	0.0022538	0.00239079	0.00251068	0.00216981	0.0024107	0.00253602	0.00253505	0.00252923	0.00244494	0.0025641	0.00266502	0.00255857	0.00234423	0.00562185	0.00454679	0.00254855	0.00253595	0.00247468	putative ABC transport system ATP-binding protein
K02004	0.000597885	0.000711399	0.000810857	0.000528372	0.000727741	0.000831457	0.000830927	0.000826435	0.000780175	0.000854701	0.000680431	0.000834184	0.000673263	0.000894386	0.000780624	0.00084217	0.000829339	0.000798449	putative ABC transport system permease protein
K02006	0.000827957	0.000839551	0.000849524	0.000820719	0.00084148	0.00085228	0.000851776	0.000850775	0.000807033	0.000854701	0.000781235	0.000852792	0.000834914	0.000894386	0.000780624	0.00085283	0.000852089	0.000819433	cobalt/nickel transport system ATP-binding protein
K02010	0.000690217	0.000384458	0.000116003	0.00087704	0.000341216	6.24708e-05	6.25445e-05	7.30199e-05	8.05751e-05	0	0.00044102	6.33457e-05	0.000484953	0.00117548	0.000835405	3.19811e-05	6.92231e-05	6.295e-05	iron(III) transport system ATP-binding protein [EC:3.6.3.30]
K02013	0.000597885	0.000711687	0.000811633	0.000528372	0.000727741	0.000831457	0.000831499	0.000827683	0.000830874	0.000854701	0.00117185	0.000856751	0.000674397	0.00442082	0.00340325	0.000842889	0.000832259	0.000835813	iron complex transport system ATP-binding protein [EC:3.6.3.34]
K02016	0.000827957	0.000839839	0.0008503	0.000820719	0.00084148	0.00085228	0.000852347	0.000852023	0.000857732	0.000854701	0.000926142	0.000856553	0.000836048	0.00148213	0.00131474	0.000853549	0.000852576	0.000856797	iron complex transport system substrate-binding protein
K02017	0	0	0	0	0	0	0	0	0	0	0.000138606	7.52231e-06	0	0.00117548	0.000835405	0	9.7326e-07	0	molybdate transport system ATP-binding protein [EC:3.6.3.29]
K02028	0.000230072	0.000128153	3.86676e-05	0.000292347	0.000113739	2.08236e-05	2.08482e-05	2.434e-05	2.68584e-05	0	0.000308714	2.98913e-05	0.000161651	0.00176322	0.00125311	1.06604e-05	2.42098e-05	2.09833e-05	polar amino acid transport system ATP-binding protein [EC:3.6.3.21]
K02031	0.00413979	0.0041992	0.0042515	0.00410359	0.0042074	0.0042614	0.00426173	0.00426012	0.00428866	0.0042735	0.00414559	0.00425644	0.00418024	0.00329645	0.00364976	0.00426774	0.00425947	0.00428398	peptide/nickel transport system ATP-binding protein
K02032	0.00331183	0.00335936	0.0034012	0.00328287	0.00336592	0.00340912	0.00340939	0.00340809	0.00343093	0.0034188	0.00321945	0.00339988	0.00334419	0.00181433	0.00233502	0.0034142	0.0034069	0.00342719	peptide/nickel transport system ATP-binding protein
K02033	0.000827957	0.000839839	0.0008503	0.000820719	0.00084148	0.00085228	0.000852347	0.000852023	0.000857732	0.000854701	0.000787536	0.000849031	0.000836048	0.000306647	0.000479331	0.000853549	0.000851603	0.000856797	peptide/nickel transport system permease protein
K02034	0.000827957	0.000839839	0.0008503	0.000820719	0.00084148	0.00085228	0.000852347	0.000852023	0.000857732	0.000854701	0.000787536	0.000849031	0.000836048	0.000306647	0.000479331	0.000853549	0.000851603	0.000856797	peptide/nickel transport system permease protein
K02035	0.000827957	0.000839839	0.0008503	0.000820719	0.00084148	0.00085228	0.000852347	0.000852023	0.000857732	0.000854701	0.000787536	0.000849031	0.000836048	0.000306647	0.000479331	0.000853549	0.000851603	0.000856797	peptide/nickel transport system substrate-binding protein
K02036	0.00142584	0.00155095	0.00166038	0.00134909	0.00156922	0.00168374	0.0016827	0.00167721	0.00158721	0.0017094	0.00132306	0.00167945	0.00150818	0.000613293	0.000725843	0.001695	0.00168046	0.00161788	phosphate transport system ATP-binding protein [EC:3.6.3.27]
K02037	0.000827957	0.000839551	0.000849524	0.000820719	0.00084148	0.00085228	0.000851776	0.000850775	0.000807033	0.000854701	0.000711932	0.000849031	0.000834914	0.000306647	0.000362922	0.00085283	0.000851603	0.000819433	phosphate transport system permease protein
K02038	0.000827957	0.000839551	0.000849524	0.000820719	0.00084148	0.00085228	0.000851776	0.000850775	0.000807033	0.000854701	0.000711932	0.000849031	0.000834914	0.000306647	0.000362922	0.00085283	0.000851603	0.000819433	phosphate transport system permease protein
K02039	0.00105803	0.000967704	0.000888192	0.00111307	0.000955219	0.000873104	0.000872624	0.000875115	0.000833891	0.000854701	0.000812737	0.000867639	0.000996565	0.000306647	0.000362922	0.000863491	0.000874353	0.000840416	phosphate transport system protein
K02040	0.00142584	0.00155095	0.00166038	0.00134909	0.00156922	0.00168374	0.0016827	0.00167721	0.00158721	0.0017094	0.00132306	0.00167945	0.00150818	0.000613293	0.000725843	0.001695	0.00168046	0.00161788	phosphate transport system substrate-binding protein
K02041	0.00142584	0.00155095	0.00166038	0.00134909	0.00156922	0.00168374	0.0016827	0.00167721	0.00158721	0.0017094	0.00139236	0.00168321	0.00150818	0.00120103	0.00114355	0.001695	0.00168094	0.00161788	phosphonate transport system ATP-binding protein [EC:3.6.3.28]
K02042	0.000827957	0.000839551	0.000849524	0.000820719	0.00084148	0.00085228	0.000851776	0.000850775	0.000807033	0.000854701	0.000781235	0.000852792	0.000834914	0.000894386	0.000780624	0.00085283	0.000852089	0.000819433	phosphonate transport system permease protein
K02044	0.00685373	0.00684543	0.00683719	0.0068581	0.00684558	0.00683907	0.00683677	0.00683428	0.00663522	0.00683761	0.00602307	0.00681085	0.00684437	0.00245317	0.0032526	0.00683546	0.00683557	0.00668854	phosphonate transport system substrate-binding protein
K02049	0.00165591	0.00167997	0.00170138	0.00164144	0.00168296	0.00170456	0.00170526	0.00170529	0.00176616	0.0017094	0.00192789	0.00171311	0.00167323	0.00296425	0.00274588	0.00170782	0.00170515	0.00175096	NitT/TauT family transport system ATP-binding protein
K02050	0.000827957	0.000839839	0.0008503	0.000820719	0.00084148	0.00085228	0.000852347	0.000852023	0.000857732	0.000854701	0.000787536	0.000849031	0.000836048	0.000306647	0.000479331	0.000853549	0.000851603	0.000856797	NitT/TauT family transport system permease protein
K02051	0.000827957	0.000839839	0.0008503	0.000820719	0.00084148	0.00085228	0.000852347	0.000852023	0.000857732	0.000854701	0.000787536	0.000849031	0.000836048	0.000306647	0.000479331	0.000853549	0.000851603	0.000856797	NitT/TauT family transport system substrate-binding protein
K02052	0	0	0	0	0	0	0	0	0	0	6.93031e-05	3.76115e-06	0	0.000587739	0.000417702	0	4.8663e-07	0	putative spermidine/putrescine transport system ATP-binding protein
K02056	0.000230072	0.000128441	3.94436e-05	0.000292347	0.000113739	2.08236e-05	2.14193e-05	2.55882e-05	7.75573e-05	0	0.000315014	2.61301e-05	0.000162786	0.00117548	0.000951814	1.13791e-05	2.37232e-05	5.83472e-05	simple sugar transport system ATP-binding protein [EC:3.6.3.17]
K02063	0	0	0	0	0	0	0	0	0	0	6.93031e-05	3.76115e-06	0	0.000587739	0.000417702	0	4.8663e-07	0	thiamine transport system permease protein
K02065	0	0	0	0	0	0	0	0	0	0	0.000207909	1.12835e-05	0	0.00176322	0.00125311	0	1.45989e-06	0	phospholipid/cholesterol/gamma-HCH transport system ATP-binding protein
K02068	0	0	0	0	0	0	0	0	0	0	6.93031e-05	3.76115e-06	0	0.000587739	0.000417702	0	4.8663e-07	0	putative ABC transport system ATP-binding protein
K02071	0	0	0	0	0	0	0	0	0	0	0.000138606	7.52231e-06	0	0.00117548	0.000835405	0	9.7326e-07	0	D-methionine transport system ATP-binding protein
K02074	0	0	0	0	0	0	0	0	0	0	6.93031e-05	3.76115e-06	0	0.000587739	0.000417702	0	4.8663e-07	0	zinc/manganese transport system ATP-binding protein
K02077	0.000597885	0.000711399	0.000810857	0.000528372	0.000727741	0.000831457	0.000830927	0.000826435	0.000780175	0.000854701	0.000611128	0.000830423	0.000673263	0.000306647	0.000362922	0.00084217	0.000828853	0.000798449	zinc/manganese transport system substrate-binding protein
K02078	0	2.88307e-07	7.75939e-07	0	0	0	5.71182e-07	1.2482e-06	5.06989e-05	0	7.56034e-05	0	1.13439e-06	0	0.000116409	7.18677e-07	0	3.73639e-05	acyl carrier protein
K02107	0.000827957	0.000839551	0.000849524	0.000820719	0.00084148	0.00085228	0.000851776	0.000850775	0.000807033	0.000854701	0.000711932	0.000849031	0.000834914	0.000306647	0.000362922	0.00085283	0.000851603	0.000819433	V/A-type H+/Na+-transporting ATPase subunit G/H
K02109	0.000230072	0.000128153	3.86676e-05	0.000292347	0.000113739	2.08236e-05	2.08482e-05	2.434e-05	2.68584e-05	0	0.000100805	1.86078e-05	0.000161651	0	0	1.06604e-05	2.275e-05	2.09833e-05	F-type H+-transporting ATPase subunit b
K02117	0.000827957	0.000839839	0.0008503	0.000820719	0.00084148	0.00085228	0.000852347	0.000852023	0.000857732	0.000854701	0.000856839	0.000852792	0.000836048	0.000894386	0.000897033	0.000853549	0.000852089	0.000856797	V/A-type H+/Na+-transporting ATPase subunit A [EC:3.6.3.14 3.6.3.15]
K02118	0.000827957	0.000839839	0.0008503	0.000820719	0.00084148	0.00085228	0.000852347	0.000852023	0.000857732	0.000854701	0.000856839	0.000852792	0.000836048	0.000894386	0.000897033	0.000853549	0.000852089	0.000856797	V/A-type H+/Na+-transporting ATPase subunit B
K02119	0.000827957	0.000839839	0.0008503	0.000820719	0.00084148	0.00085228	0.000852347	0.000852023	0.000857732	0.000854701	0.000787536	0.000849031	0.000836048	0.000306647	0.000479331	0.000853549	0.000851603	0.000856797	V/A-type H+/Na+-transporting ATPase subunit C
K02120	0.000827957	0.000839839	0.0008503	0.000820719	0.00084148	0.00085228	0.000852347	0.000852023	0.000857732	0.000854701	0.000856839	0.000852792	0.000836048	0.000894386	0.000897033	0.000853549	0.000852089	0.000856797	V/A-type H+/Na+-transporting ATPase subunit D
K02121	0.000827957	0.000839839	0.0008503	0.000820719	0.00084148	0.00085228	0.000852347	0.000852023	0.000857732	0.000854701	0.000787536	0.000849031	0.000836048	0.000306647	0.000479331	0.000853549	0.000851603	0.000856797	V/A-type H+/Na+-transporting ATPase subunit E
K02122	0.000827957	0.000839839	0.0008503	0.000820719	0.00084148	0.00085228	0.000852347	0.000852023	0.000857732	0.000854701	0.000856839	0.000852792	0.000836048	0.000894386	0.000897033	0.000853549	0.000852089	0.000856797	V/A-type H+/Na+-transporting ATPase subunit F
K02123	0.000827957	0.000839839	0.0008503	0.000820719	0.00084148	0.00085228	0.000852347	0.000852023	0.000857732	0.000854701	0.000856839	0.000852792	0.000836048	0.000894386	0.000897033	0.000853549	0.000852089	0.000856797	V/A-type H+/Na+-transporting ATPase subunit I
K02124	0.000827957	0.000839839	0.0008503	0.000820719	0.00084148	0.00085228	0.000852347	0.000852023	0.000857732	0.000854701	0.000787536	0.000849031	0.000836048	0.000306647	0.000479331	0.000853549	0.000851603	0.000856797	V/A-type H+/Na+-transporting ATPase subunit K
K02169	0.000230072	0.000128729	4.02195e-05	0.000292347	0.000113739	2.08236e-05	2.19905e-05	2.68364e-05	0.000128256	0	0.000252011	1.86078e-05	0.00016392	0	0.000232818	1.20977e-05	2.275e-05	9.5711e-05	malonyl-CoA O-methyltransferase [EC:2.1.1.197]
K02188	0.000827957	0.000839839	0.0008503	0.000820719	0.00084148	0.00085228	0.000852347	0.000852023	0.000857732	0.000854701	0.000787536	0.000849031	0.000836048	0.000306647	0.000479331	0.000853549	0.000851603	0.000856797	cobalt-precorrin-5B (C1)-methyltransferase [EC:2.1.1.195]
K02189	0.000827957	0.000839839	0.0008503	0.000820719	0.00084148	0.00085228	0.000852347	0.000852023	0.000857732	0.000854701	0.000787536	0.000849031	0.000836048	0.000306647	0.000479331	0.000853549	0.000851603	0.000856797	cobalt-precorrin 5A hydrolase [EC:3.7.1.12]
K02191	0.000827957	0.000839839	0.0008503	0.000820719	0.00084148	0.00085228	0.000852347	0.000852023	0.000857732	0.000854701	0.000787536	0.000849031	0.000836048	0.000306647	0.000479331	0.000853549	0.000851603	0.000856797	cobalt-precorrin-6B (C15)-methyltransferase [EC:2.1.1.196]
K02193	0.000230072	0.000128153	3.86676e-05	0.000292347	0.000113739	2.08236e-05	2.08482e-05	2.434e-05	2.68584e-05	0	0.000170108	2.2369e-05	0.000161651	0.000587739	0.000417702	1.06604e-05	2.32366e-05	2.09833e-05	heme exporter protein A [EC:3.6.3.41]
K02195	0	0	0	0	0	0	0	0	0	0	6.93031e-05	3.76115e-06	0	0.000587739	0.000417702	0	4.8663e-07	0	heme exporter protein C
K02197	0	0	0	0	0	0	0	0	0	0	6.93031e-05	3.76115e-06	0	0.000587739	0.000417702	0	4.8663e-07	0	cytochrome c-type biogenesis protein CcmE
K02198	0	0	0	0	0	0	0	0	0	0	6.93031e-05	3.76115e-06	0	0.000587739	0.000417702	0	4.8663e-07	0	cytochrome c-type biogenesis protein CcmF
K02199	0	2.88307e-07	7.75939e-07	0	0	0	5.71182e-07	1.2482e-06	5.06989e-05	0	7.56034e-05	0	1.13439e-06	0	0.000116409	7.18677e-07	0	3.73639e-05	cytochrome c biogenesis protein CcmG, thiol:disulfide interchange protein DsbE
K02201	0.000827957	0.000839839	0.0008503	0.000820719	0.00084148	0.00085228	0.000852347	0.000852023	0.000857732	0.000854701	0.000856839	0.000852792	0.000836048	0.000894386	0.000897033	0.000853549	0.000852089	0.000856797	pantetheine-phosphate adenylyltransferase [EC:2.7.7.3]
K02217	0.000827957	0.000839839	0.0008503	0.000820719	0.00084148	0.00085228	0.000852347	0.000852023	0.000857732	0.000854701	0.000787536	0.000849031	0.000836048	0.000306647	0.000479331	0.000853549	0.000851603	0.000856797	ferritin [EC:1.16.3.2]
K02224	0.000827957	0.000839839	0.0008503	0.000820719	0.00084148	0.00085228	0.000852347	0.000852023	0.000857732	0.000854701	0.000787536	0.000849031	0.000836048	0.000306647	0.000479331	0.000853549	0.000851603	0.000856797	cobyrinic acid a,c-diamide synthase [EC:6.3.5.9 6.3.5.11]
K02227	0.000827957	0.000839839	0.0008503	0.000820719	0.00084148	0.00085228	0.000852347	0.000852023	0.000857732	0.000854701	0.000787536	0.000849031	0.000836048	0.000306647	0.000479331	0.000853549	0.000851603	0.000856797	adenosylcobinamide-phosphate synthase [EC:6.3.1.10]
K02232	0.000827957	0.000839839	0.0008503	0.000820719	0.00084148	0.00085228	0.000852347	0.000852023	0.000857732	0.000854701	0.000787536	0.000849031	0.000836048	0.000306647	0.000479331	0.000853549	0.000851603	0.000856797	adenosylcobyric acid synthase [EC:6.3.5.10]
K02233	0.000827957	0.000839839	0.0008503	0.000820719	0.00084148	0.00085228	0.000852347	0.000852023	0.000857732	0.000854701	0.000787536	0.000849031	0.000836048	0.000306647	0.000479331	0.000853549	0.000851603	0.000856797	adenosylcobinamide-GDP ribazoletransferase [EC:2.7.8.26]
K02237	0	0	0	0	0	0	0	0	0	0	6.93031e-05	3.76115e-06	0	0.000587739	0.000417702	0	4.8663e-07	0	competence protein ComEA
K02259	0.000827957	0.000839839	0.0008503	0.000820719	0.00084148	0.00085228	0.000852347	0.000852023	0.000857732	0.000854701	0.000787536	0.000849031	0.000836048	0.000306647	0.000479331	0.000853549	0.000851603	0.000856797	cytochrome c oxidase assembly protein subunit 15
K02274	0.000827957	0.000839839	0.0008503	0.000820719	0.00084148	0.00085228	0.000852347	0.000852023	0.000857732	0.000854701	0.000856839	0.000852792	0.000836048	0.000894386	0.000897033	0.000853549	0.000852089	0.000856797	cytochrome c oxidase subunit I [EC:1.9.3.1]
K02275	0.000827957	0.000839839	0.0008503	0.000820719	0.00084148	0.00085228	0.000852347	0.000852023	0.000857732	0.000854701	0.000787536	0.000849031	0.000836048	0.000306647	0.000479331	0.000853549	0.000851603	0.000856797	cytochrome c oxidase subunit II [EC:1.9.3.1]
K02276	0	0	0	0	0	0	0	0	0	0	6.93031e-05	3.76115e-06	0	0.000587739	0.000417702	0	4.8663e-07	0	cytochrome c oxidase subunit III [EC:1.9.3.1]
K02283	0	0	0	0	0	0	0	0	0	0	6.93031e-05	3.76115e-06	0	0.000587739	0.000417702	0	4.8663e-07	0	pilus assembly protein CpaF
K02291	0	0	0	0	0	0	0	0	0	0	0.000207909	1.12835e-05	0	0.00176322	0.00125311	0	1.45989e-06	0	15-cis-phytoene/all-trans-phytoene synthase [EC:2.5.1.32 2.5.1.99]
K02298	0	0	0	0	0	0	0	0	0	0	6.93031e-05	3.76115e-06	0	0.000587739	0.000417702	0	4.8663e-07	0	cytochrome o ubiquinol oxidase subunit I [EC:1.10.3.10]
K02301	0.00165591	0.00167968	0.0017006	0.00164144	0.00168296	0.00170456	0.00170469	0.00170405	0.00171546	0.0017094	0.00164437	0.00170182	0.0016721	0.00120103	0.00137636	0.0017071	0.00170369	0.00171359	protoheme IX farnesyltransferase [EC:2.5.1.-]
K02302	0.000827957	0.000839839	0.0008503	0.000820719	0.00084148	0.00085228	0.000852347	0.000852023	0.000857732	0.000854701	0.000787536	0.000849031	0.000836048	0.000306647	0.000479331	0.000853549	0.000851603	0.000856797	uroporphyrin-III C-methyltransferase / precorrin-2 dehydrogenase / sirohydrochlorin ferrochelatase [EC:2.1.1.107 1.3.1.76 4.99.1.4]
K02303	0.00165591	0.00167939	0.00169982	0.00164144	0.00168296	0.00170456	0.00170412	0.0017028	0.00166477	0.0017094	0.00149947	0.00169806	0.00167096	0.000613293	0.000842252	0.00170638	0.00170321	0.00167623	uroporphyrin-III C-methyltransferase [EC:2.1.1.107]
K02304	0.000827957	0.000839839	0.0008503	0.000820719	0.00084148	0.00085228	0.000852347	0.000852023	0.000857732	0.000854701	0.000787536	0.000849031	0.000836048	0.000306647	0.000479331	0.000853549	0.000851603	0.000856797	precorrin-2 dehydrogenase / sirohydrochlorin ferrochelatase [EC:1.3.1.76 4.99.1.4]
K02316	0.000827957	0.000839839	0.0008503	0.000820719	0.00084148	0.00085228	0.000852347	0.000852023	0.000857732	0.000854701	0.000787536	0.000849031	0.000836048	0.000306647	0.000479331	0.000853549	0.000851603	0.000856797	DNA primase [EC:2.7.7.-]
K02319	0.000827957	0.000839839	0.0008503	0.000820719	0.00084148	0.00085228	0.000852347	0.000852023	0.000857732	0.000854701	0.000926142	0.000856553	0.000836048	0.00148213	0.00131474	0.000853549	0.000852576	0.000856797	DNA polymerase I [EC:2.7.7.7]
K02322	0.000827957	0.000839839	0.0008503	0.000820719	0.00084148	0.00085228	0.000852347	0.000852023	0.000857732	0.000854701	0.000856839	0.000852792	0.000836048	0.000894386	0.000897033	0.000853549	0.000852089	0.000856797	DNA polymerase II large subunit [EC:2.7.7.7]
K02323	0.000827957	0.000839839	0.0008503	0.000820719	0.00084148	0.00085228	0.000852347	0.000852023	0.000857732	0.000854701	0.000856839	0.000852792	0.000836048	0.000894386	0.000897033	0.000853549	0.000852089	0.000856797	DNA polymerase II small subunit [EC:2.7.7.7]
K02336	0	0	0	0	0	0	0	0	0	0	6.93031e-05	3.76115e-06	0	0.000587739	0.000417702	0	4.8663e-07	0	DNA polymerase II [EC:2.7.7.7]
K02342	0	0	0	0	0	0	0	0	0	0	6.93031e-05	3.76115e-06	0	0.000587739	0.000417702	0	4.8663e-07	0	DNA polymerase III subunit epsilon [EC:2.7.7.7]
K02343	0.000230072	0.000128153	3.86676e-05	0.000292347	0.000113739	2.08236e-05	2.08482e-05	2.434e-05	2.68584e-05	0	0.000100805	1.86078e-05	0.000161651	0	0	1.06604e-05	2.275e-05	2.09833e-05	DNA polymerase III subunit gamma/tau [EC:2.7.7.7]
K02346	0.000230072	0.000128441	3.94436e-05	0.000292347	0.000113739	2.08236e-05	2.14193e-05	2.55882e-05	7.75573e-05	0	0.000245711	2.2369e-05	0.000162786	0.000587739	0.000534111	1.13791e-05	2.32366e-05	5.83472e-05	DNA polymerase IV [EC:2.7.7.7]
K02347	0	0	0	0	0	0	0	0	0	0	6.93031e-05	3.76115e-06	0	0.000587739	0.000417702	0	4.8663e-07	0	DNA polymerase (family X)
K02355	0	2.88307e-07	7.75939e-07	0	0	0	5.71182e-07	1.2482e-06	5.06989e-05	0	0.000144907	3.76115e-06	1.13439e-06	0.000587739	0.000534111	7.18677e-07	4.8663e-07	3.73639e-05	elongation factor G
K02358	0.000827957	0.000839839	0.0008503	0.000820719	0.00084148	0.00085228	0.000852347	0.000852023	0.000857732	0.000854701	0.000856839	0.000852792	0.000836048	0.000894386	0.000897033	0.000853549	0.000852089	0.000856797	elongation factor Tu
K02371	0.000230072	0.000128153	3.86676e-05	0.000292347	0.000113739	2.08236e-05	2.08482e-05	2.434e-05	2.68584e-05	0	0.000100805	1.86078e-05	0.000161651	0	0	1.06604e-05	2.275e-05	2.09833e-05	enoyl-[acyl-carrier protein] reductase II [EC:1.3.1.9]
K02379	0	0	0	0	0	0	0	0	0	0	6.93031e-05	3.76115e-06	0	0.000587739	0.000417702	0	4.8663e-07	0	FdhD protein
K02412	0	0	0	0	0	0	0	0	0	0	6.93031e-05	3.76115e-06	0	0.000587739	0.000417702	0	4.8663e-07	0	flagellum-specific ATP synthase [EC:3.6.3.14]
K02426	0	0	0	0	0	0	0	0	0	0	6.93031e-05	3.76115e-06	0	0.000587739	0.000417702	0	4.8663e-07	0	cysteine desulfuration protein SufE
K02427	0.000827957	0.000839839	0.0008503	0.000820719	0.00084148	0.00085228	0.000852347	0.000852023	0.000857732	0.000854701	0.000856839	0.000852792	0.000836048	0.000894386	0.000897033	0.000853549	0.000852089	0.000856797	23S rRNA (uridine2552-2-O)-methyltransferase [EC:2.1.1.166]
K02428	0.000827957	0.000839839	0.0008503	0.000820719	0.00084148	0.00085228	0.000852347	0.000852023	0.000857732	0.000854701	0.000856839	0.000852792	0.000836048	0.000894386	0.000897033	0.000853549	0.000852089	0.000856797	XTP/dITP diphosphohydrolase [EC:3.6.1.66]
K02433	0.000827957	0.000839839	0.0008503	0.000820719	0.00084148	0.00085228	0.000852347	0.000852023	0.000857732	0.000854701	0.000787536	0.000849031	0.000836048	0.000306647	0.000479331	0.000853549	0.000851603	0.000856797	aspartyl-tRNA(Asn)/glutamyl-tRNA(Gln) amidotransferase subunit A [EC:6.3.5.6 6.3.5.7]
K02434	0.000827957	0.000839839	0.0008503	0.000820719	0.00084148	0.00085228	0.000852347	0.000852023	0.000857732	0.000854701	0.000787536	0.000849031	0.000836048	0.000306647	0.000479331	0.000853549	0.000851603	0.000856797	aspartyl-tRNA(Asn)/glutamyl-tRNA(Gln) amidotransferase subunit B [EC:6.3.5.6 6.3.5.7]
K02435	0.000827957	0.000839839	0.0008503	0.000820719	0.00084148	0.00085228	0.000852347	0.000852023	0.000857732	0.000854701	0.000787536	0.000849031	0.000836048	0.000306647	0.000479331	0.000853549	0.000851603	0.000856797	aspartyl-tRNA(Asn)/glutamyl-tRNA(Gln) amidotransferase subunit C [EC:6.3.5.6 6.3.5.7]
K02437	0	0	0	0	0	0	0	0	0	0	6.93031e-05	3.76115e-06	0	0.000587739	0.000417702	0	4.8663e-07	0	glycine cleavage system H protein
K02440	0.000827957	0.000839839	0.0008503	0.000820719	0.00084148	0.00085228	0.000852347	0.000852023	0.000857732	0.000854701	0.000856839	0.000852792	0.000836048	0.000894386	0.000897033	0.000853549	0.000852089	0.000856797	glycerol uptake facilitator protein
K02446	0	0	0	0	0	0	0	0	0	0	6.93031e-05	3.76115e-06	0	0.000587739	0.000417702	0	4.8663e-07	0	fructose-1,6-bisphosphatase II [EC:3.1.3.11]
K02448	0	2.88307e-07	7.75939e-07	0	0	0	5.71182e-07	1.2482e-06	5.06989e-05	0	7.56034e-05	0	1.13439e-06	0	0.000116409	7.18677e-07	0	3.73639e-05	nitric oxide reductase NorD protein
K02469	0	0	0	0	0	0	0	0	0	0	6.93031e-05	3.76115e-06	0	0.000587739	0.000417702	0	4.8663e-07	0	DNA gyrase subunit A [EC:5.99.1.3]
K02470	0	0	0	0	0	0	0	0	0	0	6.93031e-05	3.76115e-06	0	0.000587739	0.000417702	0	4.8663e-07	0	DNA gyrase subunit B [EC:5.99.1.3]
K02471	0	0	0	0	0	0	0	0	0	0	0.000138606	7.52231e-06	0	0.00117548	0.000835405	0	9.7326e-07	0	vitamin B12/bleomycin/antimicrobial peptide transport system ATP-binding/permease protein
K02472	0	0	0	0	0	0	0	0	0	0	6.93031e-05	3.76115e-06	0	0.000587739	0.000417702	0	4.8663e-07	0	UDP-N-acetyl-D-mannosaminuronic acid dehydrogenase [EC:1.1.1.336]
K02473	0	5.76615e-07	1.55188e-06	0	0	0	1.14236e-06	2.49641e-06	0.000101398	0	0.00022051	3.76115e-06	2.26879e-06	0.000587739	0.00065052	1.43735e-06	4.8663e-07	7.47277e-05	UDP-N-acetylglucosamine 4-epimerase [EC:5.1.3.7]
K02474	0	0	0	0	0	0	0	0	0	0	6.93031e-05	3.76115e-06	0	0.000587739	0.000417702	0	4.8663e-07	0	UDP-N-acetyl-D-galactosamine dehydrogenase [EC:1.1.1.-]
K02476	0.000230072	0.000128153	3.86676e-05	0.000292347	0.000113739	2.08236e-05	2.08482e-05	2.434e-05	2.68584e-05	0	0.000100805	1.86078e-05	0.000161651	0	0	1.06604e-05	2.275e-05	2.09833e-05	two-component system, CitB family, sensor kinase [EC:2.7.13.3]
K02477	0.00165591	0.0016791	0.00169905	0.00164144	0.00168296	0.00170456	0.00170355	0.00170155	0.00161407	0.0017094	0.00142386	0.00169806	0.00166983	0.000613293	0.000725843	0.00170566	0.00170321	0.00163887	two-component system, LytTR family, response regulator
K02482	0.000690217	0.000384458	0.000116003	0.00087704	0.000341216	6.24708e-05	6.25445e-05	7.30199e-05	8.05751e-05	0	0.000302414	5.58234e-05	0.000484953	0	0	3.19811e-05	6.82499e-05	6.295e-05	two-component system, NtrC family, sensor kinase [EC:2.7.13.3]
K02484	0.000460145	0.000256305	7.73353e-05	0.000584693	0.000227478	4.16472e-05	4.16963e-05	4.86799e-05	5.37167e-05	0	0.000201609	3.72156e-05	0.000323302	0	0	2.13208e-05	4.54999e-05	4.19666e-05	two-component system, OmpR family, sensor kinase [EC:2.7.13.3]
K02487	0.000230072	0.000128153	3.86676e-05	0.000292347	0.000113739	2.08236e-05	2.08482e-05	2.434e-05	2.68584e-05	0	0.000100805	1.86078e-05	0.000161651	0	0	1.06604e-05	2.275e-05	2.09833e-05	type IV pili sensor histidine kinase and response regulator
K02491	0.000597885	0.000711399	0.000810857	0.000528372	0.000727741	0.000831457	0.000830927	0.000826435	0.000780175	0.000854701	0.000611128	0.000830423	0.000673263	0.000306647	0.000362922	0.00084217	0.000828853	0.000798449	two-component system, sporulation sensor kinase A [EC:2.7.13.3]
K02492	0.00165591	0.00167968	0.0017006	0.00164144	0.00168296	0.00170456	0.00170469	0.00170405	0.00171546	0.0017094	0.00157507	0.00169806	0.0016721	0.000613293	0.000958661	0.0017071	0.00170321	0.00171359	glutamyl-tRNA reductase [EC:1.2.1.70]
K02493	0.000827957	0.000839839	0.0008503	0.000820719	0.00084148	0.00085228	0.000852347	0.000852023	0.000857732	0.000854701	0.000787536	0.000849031	0.000836048	0.000306647	0.000479331	0.000853549	0.000851603	0.000856797	release factor glutamine methyltransferase [EC:2.1.1.297]
K02500	0.000827957	0.000839839	0.0008503	0.000820719	0.00084148	0.00085228	0.000852347	0.000852023	0.000857732	0.000854701	0.000787536	0.000849031	0.000836048	0.000306647	0.000479331	0.000853549	0.000851603	0.000856797	cyclase [EC:4.1.3.-]
K02501	0.000827957	0.000839839	0.0008503	0.000820719	0.00084148	0.00085228	0.000852347	0.000852023	0.000857732	0.000854701	0.000787536	0.000849031	0.000836048	0.000306647	0.000479331	0.000853549	0.000851603	0.000856797	glutamine amidotransferase [EC:2.4.2.-]
K02503	0.00165591	0.00167968	0.0017006	0.00164144	0.00168296	0.00170456	0.00170469	0.00170405	0.00171546	0.0017094	0.00164437	0.00170182	0.0016721	0.00120103	0.00137636	0.0017071	0.00170369	0.00171359	histidine triad (HIT) family protein
K02519	0	0	0	0	0	0	0	0	0	0	6.93031e-05	3.76115e-06	0	0.000587739	0.000417702	0	4.8663e-07	0	translation initiation factor IF-2
K02523	0.000827957	0.000839839	0.0008503	0.000820719	0.00084148	0.00085228	0.000852347	0.000852023	0.000857732	0.000854701	0.000856839	0.000852792	0.000836048	0.000894386	0.000897033	0.000853549	0.000852089	0.000856797	octaprenyl-diphosphate synthase [EC:2.5.1.90]
K02528	0.000827957	0.000839839	0.0008503	0.000820719	0.00084148	0.00085228	0.000852347	0.000852023	0.000857732	0.000854701	0.000856839	0.000852792	0.000836048	0.000894386	0.000897033	0.000853549	0.000852089	0.000856797	16S rRNA (adenine1518-N6/adenine1519-N6)-dimethyltransferase [EC:2.1.1.182]
K02529	0	2.88307e-07	7.75939e-07	0	0	0	5.71182e-07	1.2482e-06	5.06989e-05	0	7.56034e-05	0	1.13439e-06	0	0.000116409	7.18677e-07	0	3.73639e-05	LacI family transcriptional regulator
K02533	0	0	0	0	0	0	0	0	0	0	6.93031e-05	3.76115e-06	0	0.000587739	0.000417702	0	4.8663e-07	0	tRNA/rRNA methyltransferase [EC:2.1.1.-]
K02536	0.0012881	0.00109614	0.000927636	0.00140541	0.00106896	0.000893928	0.000894043	0.000900703	0.000911449	0.000854701	0.000989145	0.000886246	0.00115935	0.000306647	0.000479331	0.00087487	0.000897103	0.000898763	UDP-3-O-[3-hydroxymyristoyl] glucosamine N-acyltransferase [EC:2.3.1.191]
K02548	0.000827957	0.000839839	0.0008503	0.000820719	0.00084148	0.00085228	0.000852347	0.000852023	0.000857732	0.000854701	0.000787536	0.000849031	0.000836048	0.000306647	0.000479331	0.000853549	0.000851603	0.000856797	1,4-dihydroxy-2-naphthoate octaprenyltransferase [EC:2.5.1.74 2.5.1.-]
K02563	0.000827957	0.000839839	0.0008503	0.000820719	0.00084148	0.00085228	0.000852347	0.000852023	0.000857732	0.000854701	0.000787536	0.000849031	0.000836048	0.000306647	0.000479331	0.000853549	0.000851603	0.000856797	UDP-N-acetylglucosamine--N-acetylmuramyl-(pentapeptide) pyrophosphoryl-undecaprenol N-acetylglucosamine transferase [EC:2.4.1.227]
K02566	0	0	0	0	0	0	0	0	0	0	6.93031e-05	3.76115e-06	0	0.000587739	0.000417702	0	4.8663e-07	0	NagD protein
K02594	0	2.88307e-07	7.75939e-07	0	0	0	5.71182e-07	1.2482e-06	5.06989e-05	0	7.56034e-05	0	1.13439e-06	0	0.000116409	7.18677e-07	0	3.73639e-05	homocitrate synthase NifV [EC:2.3.3.14]
K02600	0.000827957	0.000839839	0.0008503	0.000820719	0.00084148	0.00085228	0.000852347	0.000852023	0.000857732	0.000854701	0.000787536	0.000849031	0.000836048	0.000306647	0.000479331	0.000853549	0.000851603	0.000856797	N utilization substance protein A
K02601	0.000827957	0.000839839	0.0008503	0.000820719	0.00084148	0.00085228	0.000852347	0.000852023	0.000857732	0.000854701	0.000856839	0.000852792	0.000836048	0.000894386	0.000897033	0.000853549	0.000852089	0.000856797	transcriptional antiterminator NusG
K02621	0	0	0	0	0	0	0	0	0	0	6.93031e-05	3.76115e-06	0	0.000587739	0.000417702	0	4.8663e-07	0	topoisomerase IV subunit A [EC:5.99.1.-]
K02622	0	0	0	0	0	0	0	0	0	0	6.93031e-05	3.76115e-06	0	0.000587739	0.000417702	0	4.8663e-07	0	topoisomerase IV subunit B [EC:5.99.1.-]
K02626	0.000827957	0.000839839	0.0008503	0.000820719	0.00084148	0.00085228	0.000852347	0.000852023	0.000857732	0.000854701	0.000787536	0.000849031	0.000836048	0.000306647	0.000479331	0.000853549	0.000851603	0.000856797	arginine decarboxylase [EC:4.1.1.19]
K02668	0.00142584	0.00155095	0.00166038	0.00134909	0.00156922	0.00168374	0.0016827	0.00167721	0.00158721	0.0017094	0.00132306	0.00167945	0.00150818	0.000613293	0.000725843	0.001695	0.00168046	0.00161788	two-component system, NtrC family, sensor histidine kinase PilS [EC:2.7.13.3]
K02683	0.000827957	0.000839839	0.0008503	0.000820719	0.00084148	0.00085228	0.000852347	0.000852023	0.000857732	0.000854701	0.000856839	0.000852792	0.000836048	0.000894386	0.000897033	0.000853549	0.000852089	0.000856797	DNA primase small subunit [EC:2.7.7.-]
K02805	0.00105803	0.000967704	0.000888192	0.00111307	0.000955219	0.000873104	0.000872624	0.000875115	0.000833891	0.000854701	0.00088204	0.0008714	0.000996565	0.000894386	0.000780624	0.000863491	0.000874839	0.000840416	dTDP-4-amino-4,6-dideoxygalactose transaminase [EC:2.6.1.59]
K02823	0.000827957	0.000839839	0.0008503	0.000820719	0.00084148	0.00085228	0.000852347	0.000852023	0.000857732	0.000854701	0.000787536	0.000849031	0.000836048	0.000306647	0.000479331	0.000853549	0.000851603	0.000856797	dihydroorotate dehydrogenase electron transfer subunit
K02827	0	0	0	0	0	0	0	0	0	0	6.93031e-05	3.76115e-06	0	0.000587739	0.000417702	0	4.8663e-07	0	cytochrome aa3-600 menaquinol oxidase subunit I [EC:1.10.3.12]
K02858	0.000827957	0.000839839	0.0008503	0.000820719	0.00084148	0.00085228	0.000852347	0.000852023	0.000857732	0.000854701	0.000856839	0.000852792	0.000836048	0.000894386	0.000897033	0.000853549	0.000852089	0.000856797	3,4-dihydroxy 2-butanone 4-phosphate synthase [EC:4.1.99.12]
K02863	0.000827957	0.000839839	0.0008503	0.000820719	0.00084148	0.00085228	0.000852347	0.000852023	0.000857732	0.000854701	0.000856839	0.000852792	0.000836048	0.000894386	0.000897033	0.000853549	0.000852089	0.000856797	large subunit ribosomal protein L1
K02864	0.000827957	0.000839839	0.0008503	0.000820719	0.00084148	0.00085228	0.000852347	0.000852023	0.000857732	0.000854701	0.000856839	0.000852792	0.000836048	0.000894386	0.000897033	0.000853549	0.000852089	0.000856797	large subunit ribosomal protein L10
K02866	0.000827957	0.000839839	0.0008503	0.000820719	0.00084148	0.00085228	0.000852347	0.000852023	0.000857732	0.000854701	0.000856839	0.000852792	0.000836048	0.000894386	0.000897033	0.000853549	0.000852089	0.000856797	large subunit ribosomal protein L10e
K02867	0.000827957	0.000839839	0.0008503	0.000820719	0.00084148	0.00085228	0.000852347	0.000852023	0.000857732	0.000854701	0.000856839	0.000852792	0.000836048	0.000894386	0.000897033	0.000853549	0.000852089	0.000856797	large subunit ribosomal protein L11
K02869	0.000827957	0.000839839	0.0008503	0.000820719	0.00084148	0.00085228	0.000852347	0.000852023	0.000857732	0.000854701	0.000856839	0.000852792	0.000836048	0.000894386	0.000897033	0.000853549	0.000852089	0.000856797	large subunit ribosomal protein L12
K02871	0.000827957	0.000839839	0.0008503	0.000820719	0.00084148	0.00085228	0.000852347	0.000852023	0.000857732	0.000854701	0.000856839	0.000852792	0.000836048	0.000894386	0.000897033	0.000853549	0.000852089	0.000856797	large subunit ribosomal protein L13
K02874	0.000827957	0.000839839	0.0008503	0.000820719	0.00084148	0.00085228	0.000852347	0.000852023	0.000857732	0.000854701	0.000856839	0.000852792	0.000836048	0.000894386	0.000897033	0.000853549	0.000852089	0.000856797	large subunit ribosomal protein L14
K02876	0.000827957	0.000839839	0.0008503	0.000820719	0.00084148	0.00085228	0.000852347	0.000852023	0.000857732	0.000854701	0.000926142	0.000856553	0.000836048	0.00148213	0.00131474	0.000853549	0.000852576	0.000856797	large subunit ribosomal protein L15
K02877	0.000827957	0.000839839	0.0008503	0.000820719	0.00084148	0.00085228	0.000852347	0.000852023	0.000857732	0.000854701	0.000856839	0.000852792	0.000836048	0.000894386	0.000897033	0.000853549	0.000852089	0.000856797	large subunit ribosomal protein L15e
K02881	0.000827957	0.000839839	0.0008503	0.000820719	0.00084148	0.00085228	0.000852347	0.000852023	0.000857732	0.000854701	0.000856839	0.000852792	0.000836048	0.000894386	0.000897033	0.000853549	0.000852089	0.000856797	large subunit ribosomal protein L18
K02883	0.000827957	0.000839839	0.0008503	0.000820719	0.00084148	0.00085228	0.000852347	0.000852023	0.000857732	0.000854701	0.000787536	0.000849031	0.000836048	0.000306647	0.000479331	0.000853549	0.000851603	0.000856797	large subunit ribosomal protein L18e
K02885	0.000827957	0.000839839	0.0008503	0.000820719	0.00084148	0.00085228	0.000852347	0.000852023	0.000857732	0.000854701	0.000856839	0.000852792	0.000836048	0.000894386	0.000897033	0.000853549	0.000852089	0.000856797	large subunit ribosomal protein L19e
K02886	0.000827957	0.000839839	0.0008503	0.000820719	0.00084148	0.00085228	0.000852347	0.000852023	0.000857732	0.000854701	0.000856839	0.000852792	0.000836048	0.000894386	0.000897033	0.000853549	0.000852089	0.000856797	large subunit ribosomal protein L2
K02889	0.000827957	0.000839839	0.0008503	0.000820719	0.00084148	0.00085228	0.000852347	0.000852023	0.000857732	0.000854701	0.000856839	0.000852792	0.000836048	0.000894386	0.000897033	0.000853549	0.000852089	0.000856797	large subunit ribosomal protein L21e
K02890	0.000827957	0.000839839	0.0008503	0.000820719	0.00084148	0.00085228	0.000852347	0.000852023	0.000857732	0.000854701	0.000856839	0.000852792	0.000836048	0.000894386	0.000897033	0.000853549	0.000852089	0.000856797	large subunit ribosomal protein L22
K02892	0.000827957	0.000839839	0.0008503	0.000820719	0.00084148	0.00085228	0.000852347	0.000852023	0.000857732	0.000854701	0.000856839	0.000852792	0.000836048	0.000894386	0.000897033	0.000853549	0.000852089	0.000856797	large subunit ribosomal protein L23
K02895	0.000827957	0.000839839	0.0008503	0.000820719	0.00084148	0.00085228	0.000852347	0.000852023	0.000857732	0.000854701	0.000787536	0.000849031	0.000836048	0.000306647	0.000479331	0.000853549	0.000851603	0.000856797	large subunit ribosomal protein L24
K02896	0.000827957	0.000839839	0.0008503	0.000820719	0.00084148	0.00085228	0.000852347	0.000852023	0.000857732	0.000854701	0.000856839	0.000852792	0.000836048	0.000894386	0.000897033	0.000853549	0.000852089	0.000856797	large subunit ribosomal protein L24e
K02904	0.000827957	0.000839839	0.0008503	0.000820719	0.00084148	0.00085228	0.000852347	0.000852023	0.000857732	0.000854701	0.000787536	0.000849031	0.000836048	0.000306647	0.000479331	0.000853549	0.000851603	0.000856797	large subunit ribosomal protein L29
K02906	0.000827957	0.000839839	0.0008503	0.000820719	0.00084148	0.00085228	0.000852347	0.000852023	0.000857732	0.000854701	0.000856839	0.000852792	0.000836048	0.000894386	0.000897033	0.000853549	0.000852089	0.000856797	large subunit ribosomal protein L3
K02907	0.000827957	0.000839839	0.0008503	0.000820719	0.00084148	0.00085228	0.000852347	0.000852023	0.000857732	0.000854701	0.000856839	0.000852792	0.000836048	0.000894386	0.000897033	0.000853549	0.000852089	0.000856797	large subunit ribosomal protein L30
K02908	0.000827957	0.000839839	0.0008503	0.000820719	0.00084148	0.00085228	0.000852347	0.000852023	0.000857732	0.000854701	0.000856839	0.000852792	0.000836048	0.000894386	0.000897033	0.000853549	0.000852089	0.000856797	large subunit ribosomal protein L30e
K02910	0.000827957	0.000839839	0.0008503	0.000820719	0.00084148	0.00085228	0.000852347	0.000852023	0.000857732	0.000854701	0.000856839	0.000852792	0.000836048	0.000894386	0.000897033	0.000853549	0.000852089	0.000856797	large subunit ribosomal protein L31e
K02912	0.000827957	0.000839839	0.0008503	0.000820719	0.00084148	0.00085228	0.000852347	0.000852023	0.000857732	0.000854701	0.000856839	0.000852792	0.000836048	0.000894386	0.000897033	0.000853549	0.000852089	0.000856797	large subunit ribosomal protein L32e
K02921	0.000827957	0.000839839	0.0008503	0.000820719	0.00084148	0.00085228	0.000852347	0.000852023	0.000857732	0.000854701	0.000856839	0.000852792	0.000836048	0.000894386	0.000897033	0.000853549	0.000852089	0.000856797	large subunit ribosomal protein L37Ae
K02924	0.000827957	0.000839839	0.0008503	0.000820719	0.00084148	0.00085228	0.000852347	0.000852023	0.000857732	0.000854701	0.000787536	0.000849031	0.000836048	0.000306647	0.000479331	0.000853549	0.000851603	0.000856797	large subunit ribosomal protein L39e
K02927	0.000827957	0.000839839	0.0008503	0.000820719	0.00084148	0.00085228	0.000852347	0.000852023	0.000857732	0.000854701	0.000856839	0.000852792	0.000836048	0.000894386	0.000897033	0.000853549	0.000852089	0.000856797	large subunit ribosomal protein L40e
K02929	0.000827957	0.000839839	0.0008503	0.000820719	0.00084148	0.00085228	0.000852347	0.000852023	0.000857732	0.000854701	0.000856839	0.000852792	0.000836048	0.000894386	0.000897033	0.000853549	0.000852089	0.000856797	large subunit ribosomal protein L44e
K02930	0.000827957	0.000839839	0.0008503	0.000820719	0.00084148	0.00085228	0.000852347	0.000852023	0.000857732	0.000854701	0.000856839	0.000852792	0.000836048	0.000894386	0.000897033	0.000853549	0.000852089	0.000856797	large subunit ribosomal protein L4e
K02931	0.000827957	0.000839839	0.0008503	0.000820719	0.00084148	0.00085228	0.000852347	0.000852023	0.000857732	0.000854701	0.000856839	0.000852792	0.000836048	0.000894386	0.000897033	0.000853549	0.000852089	0.000856797	large subunit ribosomal protein L5
K02933	0.000827957	0.000839839	0.0008503	0.000820719	0.00084148	0.00085228	0.000852347	0.000852023	0.000857732	0.000854701	0.000856839	0.000852792	0.000836048	0.000894386	0.000897033	0.000853549	0.000852089	0.000856797	large subunit ribosomal protein L6
K02936	0.000827957	0.000839839	0.0008503	0.000820719	0.00084148	0.00085228	0.000852347	0.000852023	0.000857732	0.000854701	0.000856839	0.000852792	0.000836048	0.000894386	0.000897033	0.000853549	0.000852089	0.000856797	large subunit ribosomal protein L7Ae
K02946	0.000827957	0.000839839	0.0008503	0.000820719	0.00084148	0.00085228	0.000852347	0.000852023	0.000857732	0.000854701	0.000856839	0.000852792	0.000836048	0.000894386	0.000897033	0.000853549	0.000852089	0.000856797	small subunit ribosomal protein S10
K02948	0.000827957	0.000839839	0.0008503	0.000820719	0.00084148	0.00085228	0.000852347	0.000852023	0.000857732	0.000854701	0.000856839	0.000852792	0.000836048	0.000894386	0.000897033	0.000853549	0.000852089	0.000856797	small subunit ribosomal protein S11
K02950	0.000827957	0.000839839	0.0008503	0.000820719	0.00084148	0.00085228	0.000852347	0.000852023	0.000857732	0.000854701	0.000856839	0.000852792	0.000836048	0.000894386	0.000897033	0.000853549	0.000852089	0.000856797	small subunit ribosomal protein S12
K02952	0.000827957	0.000839839	0.0008503	0.000820719	0.00084148	0.00085228	0.000852347	0.000852023	0.000857732	0.000854701	0.000856839	0.000852792	0.000836048	0.000894386	0.000897033	0.000853549	0.000852089	0.000856797	small subunit ribosomal protein S13
K02954	0.000230072	0.000128441	3.94436e-05	0.000292347	0.000113739	2.08236e-05	2.14193e-05	2.55882e-05	7.75573e-05	0	0.000245711	2.2369e-05	0.000162786	0.000587739	0.000534111	1.13791e-05	2.32366e-05	5.83472e-05	small subunit ribosomal protein S14
K02956	0.000827957	0.000839839	0.0008503	0.000820719	0.00084148	0.00085228	0.000852347	0.000852023	0.000857732	0.000854701	0.000856839	0.000852792	0.000836048	0.000894386	0.000897033	0.000853549	0.000852089	0.000856797	small subunit ribosomal protein S15
K02961	0.000827957	0.000839839	0.0008503	0.000820719	0.00084148	0.00085228	0.000852347	0.000852023	0.000857732	0.000854701	0.000856839	0.000852792	0.000836048	0.000894386	0.000897033	0.000853549	0.000852089	0.000856797	small subunit ribosomal protein S17
K02962	0.000827957	0.000839839	0.0008503	0.000820719	0.00084148	0.00085228	0.000852347	0.000852023	0.000857732	0.000854701	0.000856839	0.000852792	0.000836048	0.000894386	0.000897033	0.000853549	0.000852089	0.000856797	small subunit ribosomal protein S17e
K02965	0.000827957	0.000839839	0.0008503	0.000820719	0.00084148	0.00085228	0.000852347	0.000852023	0.000857732	0.000854701	0.000856839	0.000852792	0.000836048	0.000894386	0.000897033	0.000853549	0.000852089	0.000856797	small subunit ribosomal protein S19
K02966	0.000827957	0.000839839	0.0008503	0.000820719	0.00084148	0.00085228	0.000852347	0.000852023	0.000857732	0.000854701	0.000856839	0.000852792	0.000836048	0.000894386	0.000897033	0.000853549	0.000852089	0.000856797	small subunit ribosomal protein S19e
K02967	0.000827957	0.000839839	0.0008503	0.000820719	0.00084148	0.00085228	0.000852347	0.000852023	0.000857732	0.000854701	0.000856839	0.000852792	0.000836048	0.000894386	0.000897033	0.000853549	0.000852089	0.000856797	small subunit ribosomal protein S2
K02975	0.000827957	0.000839551	0.000849524	0.000820719	0.00084148	0.00085228	0.000851776	0.000850775	0.000807033	0.000854701	0.000711932	0.000849031	0.000834914	0.000306647	0.000362922	0.00085283	0.000851603	0.000819433	small subunit ribosomal protein S25e
K02976	0.000827957	0.000839839	0.0008503	0.000820719	0.00084148	0.00085228	0.000852347	0.000852023	0.000857732	0.000854701	0.000787536	0.000849031	0.000836048	0.000306647	0.000479331	0.000853549	0.000851603	0.000856797	small subunit ribosomal protein S26e
K02977	0.000827957	0.000839839	0.0008503	0.000820719	0.00084148	0.00085228	0.000852347	0.000852023	0.000857732	0.000854701	0.000856839	0.000852792	0.000836048	0.000894386	0.000897033	0.000853549	0.000852089	0.000856797	small subunit ribosomal protein S27Ae
K02978	0.000827957	0.000839839	0.0008503	0.000820719	0.00084148	0.00085228	0.000852347	0.000852023	0.000857732	0.000854701	0.000856839	0.000852792	0.000836048	0.000894386	0.000897033	0.000853549	0.000852089	0.000856797	small subunit ribosomal protein S27e
K02979	0.000827957	0.000839839	0.0008503	0.000820719	0.00084148	0.00085228	0.000852347	0.000852023	0.000857732	0.000854701	0.000856839	0.000852792	0.000836048	0.000894386	0.000897033	0.000853549	0.000852089	0.000856797	small subunit ribosomal protein S28e
K02982	0.000827957	0.000839839	0.0008503	0.000820719	0.00084148	0.00085228	0.000852347	0.000852023	0.000857732	0.000854701	0.000856839	0.000852792	0.000836048	0.000894386	0.000897033	0.000853549	0.000852089	0.000856797	small subunit ribosomal protein S3
K02983	0.000827957	0.000839839	0.0008503	0.000820719	0.00084148	0.00085228	0.000852347	0.000852023	0.000857732	0.000854701	0.000787536	0.000849031	0.000836048	0.000306647	0.000479331	0.000853549	0.000851603	0.000856797	small subunit ribosomal protein S30e
K02984	0.000827957	0.000839839	0.0008503	0.000820719	0.00084148	0.00085228	0.000852347	0.000852023	0.000857732	0.000854701	0.000787536	0.000849031	0.000836048	0.000306647	0.000479331	0.000853549	0.000851603	0.000856797	small subunit ribosomal protein S3Ae
K02986	0.000827957	0.000839839	0.0008503	0.000820719	0.00084148	0.00085228	0.000852347	0.000852023	0.000857732	0.000854701	0.000856839	0.000852792	0.000836048	0.000894386	0.000897033	0.000853549	0.000852089	0.000856797	small subunit ribosomal protein S4
K02987	0.000827957	0.000839839	0.0008503	0.000820719	0.00084148	0.00085228	0.000852347	0.000852023	0.000857732	0.000854701	0.000856839	0.000852792	0.000836048	0.000894386	0.000897033	0.000853549	0.000852089	0.000856797	small subunit ribosomal protein S4e
K02988	0.000827957	0.000839839	0.0008503	0.000820719	0.00084148	0.00085228	0.000852347	0.000852023	0.000857732	0.000854701	0.000856839	0.000852792	0.000836048	0.000894386	0.000897033	0.000853549	0.000852089	0.000856797	small subunit ribosomal protein S5
K02991	0.000827957	0.000839839	0.0008503	0.000820719	0.00084148	0.00085228	0.000852347	0.000852023	0.000857732	0.000854701	0.000856839	0.000852792	0.000836048	0.000894386	0.000897033	0.000853549	0.000852089	0.000856797	small subunit ribosomal protein S6e
K02992	0.000827957	0.000839839	0.0008503	0.000820719	0.00084148	0.00085228	0.000852347	0.000852023	0.000857732	0.000854701	0.000856839	0.000852792	0.000836048	0.000894386	0.000897033	0.000853549	0.000852089	0.000856797	small subunit ribosomal protein S7
K02994	0.000827957	0.000839839	0.0008503	0.000820719	0.00084148	0.00085228	0.000852347	0.000852023	0.000857732	0.000854701	0.000856839	0.000852792	0.000836048	0.000894386	0.000897033	0.000853549	0.000852089	0.000856797	small subunit ribosomal protein S8
K02995	0.000827957	0.000839839	0.0008503	0.000820719	0.00084148	0.00085228	0.000852347	0.000852023	0.000857732	0.000854701	0.000856839	0.000852792	0.000836048	0.000894386	0.000897033	0.000853549	0.000852089	0.000856797	small subunit ribosomal protein S8e
K02996	0.000827957	0.000839839	0.0008503	0.000820719	0.00084148	0.00085228	0.000852347	0.000852023	0.000857732	0.000854701	0.000856839	0.000852792	0.000836048	0.000894386	0.000897033	0.000853549	0.000852089	0.000856797	small subunit ribosomal protein S9
K03014	0.000827957	0.000839839	0.0008503	0.000820719	0.00084148	0.00085228	0.000852347	0.000852023	0.000857732	0.000854701	0.000787536	0.000849031	0.000836048	0.000306647	0.000479331	0.000853549	0.000851603	0.000856797	DNA-directed RNA polymerases I, II, and III subunit RPABC2
K03041	0.000827957	0.000839839	0.0008503	0.000820719	0.00084148	0.00085228	0.000852347	0.000852023	0.000857732	0.000854701	0.000926142	0.000856553	0.000836048	0.00148213	0.00131474	0.000853549	0.000852576	0.000856797	DNA-directed RNA polymerase subunit A [EC:2.7.7.6]
K03042	0.000827957	0.000839839	0.0008503	0.000820719	0.00084148	0.00085228	0.000852347	0.000852023	0.000857732	0.000854701	0.000856839	0.000852792	0.000836048	0.000894386	0.000897033	0.000853549	0.000852089	0.000856797	DNA-directed RNA polymerase subunit A [EC:2.7.7.6]
K03044	0.000827957	0.000839839	0.0008503	0.000820719	0.00084148	0.00085228	0.000852347	0.000852023	0.000857732	0.000854701	0.000856839	0.000852792	0.000836048	0.000894386	0.000897033	0.000853549	0.000852089	0.000856797	DNA-directed RNA polymerase subunit B [EC:2.7.7.6]
K03045	0.000827957	0.000839839	0.0008503	0.000820719	0.00084148	0.00085228	0.000852347	0.000852023	0.000857732	0.000854701	0.000856839	0.000852792	0.000836048	0.000894386	0.000897033	0.000853549	0.000852089	0.000856797	DNA-directed RNA polymerase subunit B [EC:2.7.7.6]
K03047	0.000827957	0.000839839	0.0008503	0.000820719	0.00084148	0.00085228	0.000852347	0.000852023	0.000857732	0.000854701	0.000787536	0.000849031	0.000836048	0.000306647	0.000479331	0.000853549	0.000851603	0.000856797	DNA-directed RNA polymerase subunit D [EC:2.7.7.6]
K03049	0.000827957	0.000839839	0.0008503	0.000820719	0.00084148	0.00085228	0.000852347	0.000852023	0.000857732	0.000854701	0.000856839	0.000852792	0.000836048	0.000894386	0.000897033	0.000853549	0.000852089	0.000856797	DNA-directed RNA polymerase subunit E [EC:2.7.7.6]
K03050	0.000827957	0.000839839	0.0008503	0.000820719	0.00084148	0.00085228	0.000852347	0.000852023	0.000857732	0.000854701	0.000856839	0.000852792	0.000836048	0.000894386	0.000897033	0.000853549	0.000852089	0.000856797	DNA-directed RNA polymerase subunit E [EC:2.7.7.6]
K03051	0.000827957	0.000839839	0.0008503	0.000820719	0.00084148	0.00085228	0.000852347	0.000852023	0.000857732	0.000854701	0.000787536	0.000849031	0.000836048	0.000306647	0.000479331	0.000853549	0.000851603	0.000856797	DNA-directed RNA polymerase subunit F [EC:2.7.7.6]
K03053	0.000827957	0.000839839	0.0008503	0.000820719	0.00084148	0.00085228	0.000852347	0.000852023	0.000857732	0.000854701	0.000787536	0.000849031	0.000836048	0.000306647	0.000479331	0.000853549	0.000851603	0.000856797	DNA-directed RNA polymerase subunit H [EC:2.7.7.6]
K03055	0	0	0	0	0	0	0	0	0	0	6.93031e-05	3.76115e-06	0	0.000587739	0.000417702	0	4.8663e-07	0	DNA-directed RNA polymerase subunit K [EC:2.7.7.6]
K03056	0.000827957	0.000839839	0.0008503	0.000820719	0.00084148	0.00085228	0.000852347	0.000852023	0.000857732	0.000854701	0.000787536	0.000849031	0.000836048	0.000306647	0.000479331	0.000853549	0.000851603	0.000856797	DNA-directed RNA polymerase subunit L [EC:2.7.7.6]
K03057	0.000827957	0.000839839	0.0008503	0.000820719	0.00084148	0.00085228	0.000852347	0.000852023	0.000857732	0.000854701	0.000787536	0.000849031	0.000836048	0.000306647	0.000479331	0.000853549	0.000851603	0.000856797	transcription elongation factor TFS
K03058	0.000827957	0.000839839	0.0008503	0.000820719	0.00084148	0.00085228	0.000852347	0.000852023	0.000857732	0.000854701	0.000856839	0.000852792	0.000836048	0.000894386	0.000897033	0.000853549	0.000852089	0.000856797	DNA-directed RNA polymerase subunit N [EC:2.7.7.6]
K03059	0.000827957	0.000839839	0.0008503	0.000820719	0.00084148	0.00085228	0.000852347	0.000852023	0.000857732	0.000854701	0.000787536	0.000849031	0.000836048	0.000306647	0.000479331	0.000853549	0.000851603	0.000856797	DNA-directed RNA polymerase subunit P [EC:2.7.7.6]
K03076	0.000827957	0.000839839	0.0008503	0.000820719	0.00084148	0.00085228	0.000852347	0.000852023	0.000857732	0.000854701	0.000856839	0.000852792	0.000836048	0.000894386	0.000897033	0.000853549	0.000852089	0.000856797	preprotein translocase subunit SecY
K03088	0.000597885	0.000711399	0.000810857	0.000528372	0.000727741	0.000831457	0.000830927	0.000826435	0.000780175	0.000854701	0.000611128	0.000830423	0.000673263	0.000306647	0.000362922	0.00084217	0.000828853	0.000798449	RNA polymerase sigma-70 factor, ECF subfamily
K03105	0.000827957	0.000839839	0.0008503	0.000820719	0.00084148	0.00085228	0.000852347	0.000852023	0.000857732	0.000854701	0.000787536	0.000849031	0.000836048	0.000306647	0.000479331	0.000853549	0.000851603	0.000856797	signal recognition particle subunit SRP19
K03106	0.000827957	0.000839839	0.0008503	0.000820719	0.00084148	0.00085228	0.000852347	0.000852023	0.000857732	0.000854701	0.000856839	0.000852792	0.000836048	0.000894386	0.000897033	0.000853549	0.000852089	0.000856797	signal recognition particle subunit SRP54 [EC:3.6.5.4]
K03110	0.00165591	0.00167968	0.0017006	0.00164144	0.00168296	0.00170456	0.00170469	0.00170405	0.00171546	0.0017094	0.00171368	0.00170558	0.0016721	0.00178877	0.00179407	0.0017071	0.00170418	0.00171359	fused signal recognition particle receptor
K03113	0.000827957	0.000839839	0.0008503	0.000820719	0.00084148	0.00085228	0.000852347	0.000852023	0.000857732	0.000854701	0.000856839	0.000852792	0.000836048	0.000894386	0.000897033	0.000853549	0.000852089	0.000856797	translation initiation factor 1
K03116	0.00165591	0.00167968	0.0017006	0.00164144	0.00168296	0.00170456	0.00170469	0.00170405	0.00171546	0.0017094	0.00157507	0.00169806	0.0016721	0.000613293	0.000958661	0.0017071	0.00170321	0.00171359	sec-independent protein translocase protein TatA
K03118	0.000827957	0.000839839	0.0008503	0.000820719	0.00084148	0.00085228	0.000852347	0.000852023	0.000857732	0.000854701	0.000787536	0.000849031	0.000836048	0.000306647	0.000479331	0.000853549	0.000851603	0.000856797	sec-independent protein translocase protein TatC
K03120	0.00188599	0.00180783	0.00173927	0.00193378	0.0017967	0.00172538	0.00172554	0.00172839	0.00174232	0.0017094	0.00174518	0.00172043	0.00183375	0.00120103	0.00137636	0.00171776	0.00172644	0.00173458	transcription initiation factor TFIID TATA-box-binding protein
K03124	0.00731388	0.00710202	0.0069153	0.00744279	0.00707306	0.00688071	0.00687903	0.00688421	0.00673964	0.00683761	0.00643889	0.00685559	0.0071688	0.00362865	0.00420441	0.0068575	0.00688204	0.00676787	transcription initiation factor TFIIB
K03136	0.000827957	0.000839839	0.0008503	0.000820719	0.00084148	0.00085228	0.000852347	0.000852023	0.000857732	0.000854701	0.000787536	0.000849031	0.000836048	0.000306647	0.000479331	0.000853549	0.000851603	0.000856797	transcription initiation factor TFIIE subunit alpha
K03146	0.000827957	0.000839839	0.0008503	0.000820719	0.00084148	0.00085228	0.000852347	0.000852023	0.000857732	0.000854701	0.000787536	0.000849031	0.000836048	0.000306647	0.000479331	0.000853549	0.000851603	0.000856797	thiamine thiazole synthase
K03147	0.000827957	0.000839839	0.0008503	0.000820719	0.00084148	0.00085228	0.000852347	0.000852023	0.000857732	0.000854701	0.000787536	0.000849031	0.000836048	0.000306647	0.000479331	0.000853549	0.000851603	0.000856797	phosphomethylpyrimidine synthase [EC:4.1.99.17]
K03151	0	0	0	0	0	0	0	0	0	0	6.93031e-05	3.76115e-06	0	0.000587739	0.000417702	0	4.8663e-07	0	tRNA uracil 4-sulfurtransferase [EC:2.8.1.4]
K03163	0.000827957	0.000839839	0.0008503	0.000820719	0.00084148	0.00085228	0.000852347	0.000852023	0.000857732	0.000854701	0.000787536	0.000849031	0.000836048	0.000306647	0.000479331	0.000853549	0.000851603	0.000856797	DNA topoisomerase I [EC:5.99.1.2]
K03166	0.000827957	0.000839839	0.0008503	0.000820719	0.00084148	0.00085228	0.000852347	0.000852023	0.000857732	0.000854701	0.000926142	0.000856553	0.000836048	0.00148213	0.00131474	0.000853549	0.000852576	0.000856797	DNA topoisomerase VI subunit A [EC:5.99.1.3]
K03167	0.000827957	0.000839839	0.0008503	0.000820719	0.00084148	0.00085228	0.000852347	0.000852023	0.000857732	0.000854701	0.000856839	0.000852792	0.000836048	0.000894386	0.000897033	0.000853549	0.000852089	0.000856797	DNA topoisomerase VI subunit B [EC:5.99.1.3]
K03168	0	2.88307e-07	7.75939e-07	0	0	0	5.71182e-07	1.2482e-06	5.06989e-05	0	0.000144907	3.76115e-06	1.13439e-06	0.000587739	0.000534111	7.18677e-07	4.8663e-07	3.73639e-05	DNA topoisomerase I [EC:5.99.1.2]
K03169	0	0	0	0	0	0	0	0	0	0	6.93031e-05	3.76115e-06	0	0.000587739	0.000417702	0	4.8663e-07	0	DNA topoisomerase III [EC:5.99.1.2]
K03177	0	2.88307e-07	7.75939e-07	0	0	0	5.71182e-07	1.2482e-06	5.06989e-05	0	0.000144907	3.76115e-06	1.13439e-06	0.000587739	0.000534111	7.18677e-07	4.8663e-07	3.73639e-05	tRNA pseudouridine55 synthase [EC:5.4.99.25]
K03179	0	0	0	0	0	0	0	0	0	0	6.93031e-05	3.76115e-06	0	0.000587739	0.000417702	0	4.8663e-07	0	4-hydroxybenzoate polyprenyltransferase [EC:2.5.1.39]
K03182	0.000827957	0.000839839	0.0008503	0.000820719	0.00084148	0.00085228	0.000852347	0.000852023	0.000857732	0.000854701	0.000856839	0.000852792	0.000836048	0.000894386	0.000897033	0.000853549	0.000852089	0.000856797	4-hydroxy-3-polyprenylbenzoate decarboxylase [EC:4.1.1.98]
K03183	0.000827957	0.000840128	0.000851076	0.000820719	0.00084148	0.00085228	0.000852918	0.000853271	0.000908431	0.000854701	0.000932442	0.000852792	0.000837183	0.000894386	0.00101344	0.000854268	0.000852089	0.00089416	demethylmenaquinone methyltransferase / 2-methoxy-6-polyprenyl-1,4-benzoquinol methylase [EC:2.1.1.163 2.1.1.201]
K03186	0.000827957	0.000839839	0.0008503	0.000820719	0.00084148	0.00085228	0.000852347	0.000852023	0.000857732	0.000854701	0.000856839	0.000852792	0.000836048	0.000894386	0.000897033	0.000853549	0.000852089	0.000856797	flavin prenyltransferase [EC:2.5.1.129]
K03190	0	2.88307e-07	7.75939e-07	0	0	0	5.71182e-07	1.2482e-06	5.06989e-05	0	7.56034e-05	0	1.13439e-06	0	0.000116409	7.18677e-07	0	3.73639e-05	urease accessory protein
K03231	0.000827957	0.000839839	0.0008503	0.000820719	0.00084148	0.00085228	0.000852347	0.000852023	0.000857732	0.000854701	0.000856839	0.000852792	0.000836048	0.000894386	0.000897033	0.000853549	0.000852089	0.000856797	elongation factor 1-alpha
K03232	0.000827957	0.000839839	0.0008503	0.000820719	0.00084148	0.00085228	0.000852347	0.000852023	0.000857732	0.000854701	0.000787536	0.000849031	0.000836048	0.000306647	0.000479331	0.000853549	0.000851603	0.000856797	elongation factor 1-beta
K03234	0.000827957	0.000839839	0.0008503	0.000820719	0.00084148	0.00085228	0.000852347	0.000852023	0.000857732	0.000854701	0.000856839	0.000852792	0.000836048	0.000894386	0.000897033	0.000853549	0.000852089	0.000856797	elongation factor 2
K03236	0.00142584	0.00155124	0.00166116	0.00134909	0.00156922	0.00168374	0.00168327	0.00167846	0.00163791	0.0017094	0.00146797	0.00168321	0.00150931	0.00120103	0.00125995	0.00169572	0.00168094	0.00165525	translation initiation factor 1A
K03237	0.000827957	0.000839839	0.0008503	0.000820719	0.00084148	0.00085228	0.000852347	0.000852023	0.000857732	0.000854701	0.000856839	0.000852792	0.000836048	0.000894386	0.000897033	0.000853549	0.000852089	0.000856797	translation initiation factor 2 subunit 1
K03238	0.000827957	0.000839839	0.0008503	0.000820719	0.00084148	0.00085228	0.000852347	0.000852023	0.000857732	0.000854701	0.000787536	0.000849031	0.000836048	0.000306647	0.000479331	0.000853549	0.000851603	0.000856797	translation initiation factor 2 subunit 2
K03242	0.000827957	0.000839839	0.0008503	0.000820719	0.00084148	0.00085228	0.000852347	0.000852023	0.000857732	0.000854701	0.000856839	0.000852792	0.000836048	0.000894386	0.000897033	0.000853549	0.000852089	0.000856797	translation initiation factor 2 subunit 3
K03243	0.000827957	0.000839839	0.0008503	0.000820719	0.00084148	0.00085228	0.000852347	0.000852023	0.000857732	0.000854701	0.000856839	0.000852792	0.000836048	0.000894386	0.000897033	0.000853549	0.000852089	0.000856797	translation initiation factor 5B
K03263	0.000827957	0.000839839	0.0008503	0.000820719	0.00084148	0.00085228	0.000852347	0.000852023	0.000857732	0.000854701	0.000856839	0.000852792	0.000836048	0.000894386	0.000897033	0.000853549	0.000852089	0.000856797	translation initiation factor 5A
K03264	0.000827957	0.000839839	0.0008503	0.000820719	0.00084148	0.00085228	0.000852347	0.000852023	0.000857732	0.000854701	0.000856839	0.000852792	0.000836048	0.000894386	0.000897033	0.000853549	0.000852089	0.000856797	translation initiation factor 6
K03265	0.00105803	0.000967992	0.000888968	0.00111307	0.000955219	0.000873104	0.000873195	0.000876363	0.00088459	0.000854701	0.000957643	0.0008714	0.000997699	0.000894386	0.000897033	0.000864209	0.000874839	0.00087778	peptide chain release factor subunit 1
K03270	0	2.88307e-07	7.75939e-07	0	0	0	5.71182e-07	1.2482e-06	5.06989e-05	0	7.56034e-05	0	1.13439e-06	0	0.000116409	7.18677e-07	0	3.73639e-05	3-deoxy-D-manno-octulosonate 8-phosphate phosphatase (KDO 8-P phosphatase) [EC:3.1.3.45]
K03271	0	5.76615e-07	1.55188e-06	0	0	0	1.14236e-06	2.49641e-06	0.000101398	0	0.000151207	0	2.26879e-06	0	0.000232818	1.43735e-06	0	7.47277e-05	D-sedoheptulose 7-phosphate isomerase [EC:5.3.1.28]
K03272	0	2.88307e-07	7.75939e-07	0	0	0	5.71182e-07	1.2482e-06	5.06989e-05	0	0.000144907	3.76115e-06	1.13439e-06	0.000587739	0.000534111	7.18677e-07	4.8663e-07	3.73639e-05	D-beta-D-heptose 7-phosphate kinase / D-beta-D-heptose 1-phosphate adenosyltransferase [EC:2.7.1.167 2.7.7.70]
K03273	0	2.88307e-07	7.75939e-07	0	0	0	5.71182e-07	1.2482e-06	5.06989e-05	0	0.000144907	3.76115e-06	1.13439e-06	0.000587739	0.000534111	7.18677e-07	4.8663e-07	3.73639e-05	D-glycero-D-manno-heptose 1,7-bisphosphate phosphatase [EC:3.1.3.82 3.1.3.83]
K03281	0.000230072	0.000128153	3.86676e-05	0.000292347	0.000113739	2.08236e-05	2.08482e-05	2.434e-05	2.68584e-05	0	0.000100805	1.86078e-05	0.000161651	0	0	1.06604e-05	2.275e-05	2.09833e-05	chloride channel protein, CIC family
K03284	0.00165591	0.0016791	0.00169905	0.00164144	0.00168296	0.00170456	0.00170355	0.00170155	0.00161407	0.0017094	0.00142386	0.00169806	0.00166983	0.000613293	0.000725843	0.00170566	0.00170321	0.00163887	magnesium transporter
K03286	0	0	0	0	0	0	0	0	0	0	0.000138606	7.52231e-06	0	0.00117548	0.000835405	0	9.7326e-07	0	OmpA-OmpF porin, OOP family
K03294	0.000827957	0.000839839	0.0008503	0.000820719	0.00084148	0.00085228	0.000852347	0.000852023	0.000857732	0.000854701	0.000926142	0.000856553	0.000836048	0.00148213	0.00131474	0.000853549	0.000852576	0.000856797	basic amino acid/polyamine antiporter, APA family
K03297	0	0	0	0	0	0	0	0	0	0	6.93031e-05	3.76115e-06	0	0.000587739	0.000417702	0	4.8663e-07	0	small multidrug resistance pump
K03306	0	2.88307e-07	7.75939e-07	0	0	0	5.71182e-07	1.2482e-06	5.06989e-05	0	0.000144907	3.76115e-06	1.13439e-06	0.000587739	0.000534111	7.18677e-07	4.8663e-07	3.73639e-05	inorganic phosphate transporter, PiT family
K03308	0	0	0	0	0	0	0	0	0	0	6.93031e-05	3.76115e-06	0	0.000587739	0.000417702	0	4.8663e-07	0	neurotransmitter:Na+ symporter, NSS family
K03309	0.000230072	0.000128153	3.86676e-05	0.000292347	0.000113739	2.08236e-05	2.08482e-05	2.434e-05	2.68584e-05	0	0.000100805	1.86078e-05	0.000161651	0	0	1.06604e-05	2.275e-05	2.09833e-05	dicarboxylate/amino acid:cation (Na+ or H+) symporter, DAACS family
K03316	0.000827957	0.000839551	0.000849524	0.000820719	0.00084148	0.00085228	0.000851776	0.000850775	0.000807033	0.000854701	0.000711932	0.000849031	0.000834914	0.000306647	0.000362922	0.00085283	0.000851603	0.000819433	monovalent cation:H+ antiporter, CPA1 family
K03320	0.00165591	0.00167968	0.0017006	0.00164144	0.00168296	0.00170456	0.00170469	0.00170405	0.00171546	0.0017094	0.00157507	0.00169806	0.0016721	0.000613293	0.000958661	0.0017071	0.00170321	0.00171359	ammonium transporter, Amt family
K03330	0.000827957	0.000839839	0.0008503	0.000820719	0.00084148	0.00085228	0.000852347	0.000852023	0.000857732	0.000854701	0.000856839	0.000852792	0.000836048	0.000894386	0.000897033	0.000853549	0.000852089	0.000856797	glutamyl-tRNA(Gln) amidotransferase subunit E [EC:6.3.5.7]
K03366	0.000597885	0.000711399	0.000810857	0.000528372	0.000727741	0.000831457	0.000830927	0.000826435	0.000780175	0.000854701	0.000611128	0.000830423	0.000673263	0.000306647	0.000362922	0.00084217	0.000828853	0.000798449	meso-butanediol dehydrogenase / (S,S)-butanediol dehydrogenase / diacetyl reductase [EC:1.1.1.- 1.1.1.76 1.1.1.304]
K03386	0.000597885	0.000711399	0.000810857	0.000528372	0.000727741	0.000831457	0.000830927	0.000826435	0.000780175	0.000854701	0.000680431	0.000834184	0.000673263	0.000894386	0.000780624	0.00084217	0.000829339	0.000798449	peroxiredoxin (alkyl hydroperoxide reductase subunit C) [EC:1.11.1.15]
K03387	0.000827957	0.000839839	0.0008503	0.000820719	0.00084148	0.00085228	0.000852347	0.000852023	0.000857732	0.000854701	0.000787536	0.000849031	0.000836048	0.000306647	0.000479331	0.000853549	0.000851603	0.000856797	alkyl hydroperoxide reductase subunit F [EC:1.6.4.-]
K03394	0.000827957	0.000839839	0.0008503	0.000820719	0.00084148	0.00085228	0.000852347	0.000852023	0.000857732	0.000854701	0.000787536	0.000849031	0.000836048	0.000306647	0.000479331	0.000853549	0.000851603	0.000856797	precorrin-2/cobalt-factor-2 C20-methyltransferase [EC:2.1.1.130 2.1.1.151]
K03399	0.000827957	0.000839839	0.0008503	0.000820719	0.00084148	0.00085228	0.000852347	0.000852023	0.000857732	0.000854701	0.000787536	0.000849031	0.000836048	0.000306647	0.000479331	0.000853549	0.000851603	0.000856797	cobalt-precorrin-7 (C5)-methyltransferase [EC:2.1.1.289]
K03404	0	0	0	0	0	0	0	0	0	0	6.93031e-05	3.76115e-06	0	0.000587739	0.000417702	0	4.8663e-07	0	magnesium chelatase subunit D [EC:6.6.1.1]
K03406	0.000230072	0.000128153	3.86676e-05	0.000292347	0.000113739	2.08236e-05	2.08482e-05	2.434e-05	2.68584e-05	0	0.000100805	1.86078e-05	0.000161651	0	0	1.06604e-05	2.275e-05	2.09833e-05	methyl-accepting chemotaxis protein
K03407	0.000230072	0.000128153	3.86676e-05	0.000292347	0.000113739	2.08236e-05	2.08482e-05	2.434e-05	2.68584e-05	0	0.000100805	1.86078e-05	0.000161651	0	0	1.06604e-05	2.275e-05	2.09833e-05	two-component system, chemotaxis family, sensor kinase CheA [EC:2.7.13.3]
K03408	0.000230072	0.000128153	3.86676e-05	0.000292347	0.000113739	2.08236e-05	2.08482e-05	2.434e-05	2.68584e-05	0	0.000100805	1.86078e-05	0.000161651	0	0	1.06604e-05	2.275e-05	2.09833e-05	purine-binding chemotaxis protein CheW
K03410	0.000230072	0.000128153	3.86676e-05	0.000292347	0.000113739	2.08236e-05	2.08482e-05	2.434e-05	2.68584e-05	0	0.000100805	1.86078e-05	0.000161651	0	0	1.06604e-05	2.275e-05	2.09833e-05	chemotaxis protein CheC
K03412	0.00280628	0.00231987	0.00189239	0.00310317	0.00225165	0.00180868	0.00180779	0.00182325	0.00174836	0.0017094	0.00192789	0.0017911	0.00247808	0.000613293	0.000725843	0.00175896	0.00181696	0.00174378	two-component system, chemotaxis family, protein-glutamate methylesterase/glutaminase [EC:3.1.1.61 3.5.1.44]
K03413	0.00901671	0.007671	0.00648802	0.00983788	0.0074827	0.00625749	0.0062543	0.00629618	0.00602525	0.00598291	0.00639479	0.00620372	0.00810751	0.00214653	0.00254045	0.00611906	0.00627972	0.0060298	two-component system, chemotaxis family, chemotaxis protein CheY
K03417	0.000827957	0.000839839	0.0008503	0.000820719	0.00084148	0.00085228	0.000852347	0.000852023	0.000857732	0.000854701	0.000787536	0.000849031	0.000836048	0.000306647	0.000479331	0.000853549	0.000851603	0.000856797	methylisocitrate lyase [EC:4.1.3.30]
K03420	0.00188599	0.00180754	0.00173849	0.00193378	0.0017967	0.00172538	0.00172497	0.00172714	0.00169162	0.0017094	0.00173888	0.00172419	0.00183261	0.00178877	0.00167766	0.00171704	0.00172693	0.00169721	proteasome regulatory subunit
K03424	0.000827957	0.000839839	0.0008503	0.000820719	0.00084148	0.00085228	0.000852347	0.000852023	0.000857732	0.000854701	0.000787536	0.000849031	0.000836048	0.000306647	0.000479331	0.000853549	0.000851603	0.000856797	TatD DNase family protein [EC:3.1.21.-]
K03427	0.00119577	0.0014228	0.00162171	0.00105674	0.00145548	0.00166291	0.00166185	0.00165287	0.00156035	0.0017094	0.00122226	0.00166085	0.00134653	0.000613293	0.000725843	0.00168434	0.00165771	0.0015969	type I restriction enzyme M protein [EC:2.1.1.72]
K03431	0.000827957	0.000839551	0.000849524	0.000820719	0.00084148	0.00085228	0.000851776	0.000850775	0.000807033	0.000854701	0.000781235	0.000852792	0.000834914	0.000894386	0.000780624	0.00085283	0.000852089	0.000819433	phosphoglucosamine mutase [EC:5.4.2.10]
K03432	0.00248387	0.00251923	0.00255013	0.00246216	0.00252444	0.00255684	0.00255647	0.00255482	0.0025225	0.0025641	0.00235631	0.00255085	0.00250701	0.00150768	0.00173929	0.00255993	0.00255529	0.00253303	proteasome alpha subunit [EC:3.4.25.1]
K03433	0.00165591	0.00167968	0.0017006	0.00164144	0.00168296	0.00170456	0.00170469	0.00170405	0.00171546	0.0017094	0.00164437	0.00170182	0.0016721	0.00120103	0.00137636	0.0017071	0.00170369	0.00171359	proteasome beta subunit [EC:3.4.25.1]
K03442	0.00165591	0.0016791	0.00169905	0.00164144	0.00168296	0.00170456	0.00170355	0.00170155	0.00161407	0.0017094	0.00142386	0.00169806	0.00166983	0.000613293	0.000725843	0.00170566	0.00170321	0.00163887	small conductance mechanosensitive channel
K03455	0.00151817	0.00122459	0.000967079	0.00169776	0.0011827	0.000914751	0.000915462	0.000926291	0.000989006	0.000854701	0.00116555	0.000904854	0.00132214	0.000306647	0.000595739	0.000886249	0.000919853	0.00095711	monovalent cation:H+ antiporter-2, CPA2 family
K03469	0.000827957	0.000839839	0.0008503	0.000820719	0.00084148	0.00085228	0.000852347	0.000852023	0.000857732	0.000854701	0.000787536	0.000849031	0.000836048	0.000306647	0.000479331	0.000853549	0.000851603	0.000856797	ribonuclease HI [EC:3.1.26.4]
K03470	0.000827957	0.000839839	0.0008503	0.000820719	0.00084148	0.00085228	0.000852347	0.000852023	0.000857732	0.000854701	0.000856839	0.000852792	0.000836048	0.000894386	0.000897033	0.000853549	0.000852089	0.000856797	ribonuclease HII [EC:3.1.26.4]
K03496	0.000597885	0.000711399	0.000810857	0.000528372	0.000727741	0.000831457	0.000830927	0.000826435	0.000780175	0.000854701	0.000680431	0.000834184	0.000673263	0.000894386	0.000780624	0.00084217	0.000829339	0.000798449	chromosome partitioning protein
K03497	0.00119577	0.0014228	0.00162171	0.00105674	0.00145548	0.00166291	0.00166185	0.00165287	0.00156035	0.0017094	0.00122226	0.00166085	0.00134653	0.000613293	0.000725843	0.00168434	0.00165771	0.0015969	chromosome partitioning protein, ParB family
K03498	0.000827957	0.000839551	0.000849524	0.000820719	0.00084148	0.00085228	0.000851776	0.000850775	0.000807033	0.000854701	0.000781235	0.000852792	0.000834914	0.000894386	0.000780624	0.00085283	0.000852089	0.000819433	trk system potassium uptake protein
K03500	0	0	0	0	0	0	0	0	0	0	6.93031e-05	3.76115e-06	0	0.000587739	0.000417702	0	4.8663e-07	0	16S rRNA (cytosine967-C5)-methyltransferase [EC:2.1.1.176]
K03517	0.000827957	0.000839839	0.0008503	0.000820719	0.00084148	0.00085228	0.000852347	0.000852023	0.000857732	0.000854701	0.000856839	0.000852792	0.000836048	0.000894386	0.000897033	0.000853549	0.000852089	0.000856797	quinolinate synthase [EC:2.5.1.72]
K03518	0	0	0	0	0	0	0	0	0	0	6.93031e-05	3.76115e-06	0	0.000587739	0.000417702	0	4.8663e-07	0	aerobic carbon-monoxide dehydrogenase small subunit [EC:1.2.5.3]
K03520	0	0	0	0	0	0	0	0	0	0	6.93031e-05	3.76115e-06	0	0.000587739	0.000417702	0	4.8663e-07	0	aerobic carbon-monoxide dehydrogenase large subunit [EC:1.2.5.3]
K03521	0	0	0	0	0	0	0	0	0	0	6.93031e-05	3.76115e-06	0	0.000587739	0.000417702	0	4.8663e-07	0	electron transfer flavoprotein beta subunit
K03522	0	0	0	0	0	0	0	0	0	0	6.93031e-05	3.76115e-06	0	0.000587739	0.000417702	0	4.8663e-07	0	electron transfer flavoprotein alpha subunit
K03523	0	0	0	0	0	0	0	0	0	0	6.93031e-05	3.76115e-06	0	0.000587739	0.000417702	0	4.8663e-07	0	biotin transport system substrate-specific component
K03524	0.000827957	0.000839839	0.0008503	0.000820719	0.00084148	0.00085228	0.000852347	0.000852023	0.000857732	0.000854701	0.000856839	0.000852792	0.000836048	0.000894386	0.000897033	0.000853549	0.000852089	0.000856797	BirA family transcriptional regulator, biotin operon repressor / biotin---[acetyl-CoA-carboxylase] ligase [EC:6.3.4.15]
K03529	0.00105803	0.000967992	0.000888968	0.00111307	0.000955219	0.000873104	0.000873195	0.000876363	0.00088459	0.000854701	0.000957643	0.0008714	0.000997699	0.000894386	0.000897033	0.000864209	0.000874839	0.00087778	chromosome segregation protein
K03531	0.00165591	0.00167968	0.0017006	0.00164144	0.00168296	0.00170456	0.00170469	0.00170405	0.00171546	0.0017094	0.00171368	0.00170558	0.0016721	0.00178877	0.00179407	0.0017071	0.00170418	0.00171359	cell division protein FtsZ
K03538	0.000827957	0.000839839	0.0008503	0.000820719	0.00084148	0.00085228	0.000852347	0.000852023	0.000857732	0.000854701	0.000787536	0.000849031	0.000836048	0.000306647	0.000479331	0.000853549	0.000851603	0.000856797	ribonuclease P protein subunit POP4 [EC:3.1.26.5]
K03540	0.000827957	0.000839839	0.0008503	0.000820719	0.00084148	0.00085228	0.000852347	0.000852023	0.000857732	0.000854701	0.000787536	0.000849031	0.000836048	0.000306647	0.000479331	0.000853549	0.000851603	0.000856797	ribonuclease P protein subunit RPR2 [EC:3.1.26.5]
K03545	0	0	0	0	0	0	0	0	0	0	6.93031e-05	3.76115e-06	0	0.000587739	0.000417702	0	4.8663e-07	0	trigger factor
K03546	0.00142584	0.00155124	0.00166116	0.00134909	0.00156922	0.00168374	0.00168327	0.00167846	0.00163791	0.0017094	0.00139866	0.00167945	0.00150931	0.000613293	0.000842252	0.00169572	0.00168046	0.00165525	DNA repair protein SbcC/Rad50
K03555	0	0	0	0	0	0	0	0	0	0	6.93031e-05	3.76115e-06	0	0.000587739	0.000417702	0	4.8663e-07	0	DNA mismatch repair protein MutS
K03561	0	2.88307e-07	7.75939e-07	0	0	0	5.71182e-07	1.2482e-06	5.06989e-05	0	7.56034e-05	0	1.13439e-06	0	0.000116409	7.18677e-07	0	3.73639e-05	biopolymer transport protein ExbB
K03564	0.00105803	0.00096828	0.000889744	0.00111307	0.000955219	0.000873104	0.000873766	0.000877611	0.000935289	0.000854701	0.00110255	0.000875161	0.000998834	0.00148213	0.00143114	0.000864928	0.000875326	0.000915144	peroxiredoxin Q/BCP [EC:1.11.1.15]
K03568	0.000827957	0.000839551	0.000849524	0.000820719	0.00084148	0.00085228	0.000851776	0.000850775	0.000807033	0.000854701	0.000781235	0.000852792	0.000834914	0.000894386	0.000780624	0.00085283	0.000852089	0.000819433	TldD protein
K03569	0	0	0	0	0	0	0	0	0	0	6.93031e-05	3.76115e-06	0	0.000587739	0.000417702	0	4.8663e-07	0	rod shape-determining protein MreB and related proteins
K03572	0	0	0	0	0	0	0	0	0	0	6.93031e-05	3.76115e-06	0	0.000587739	0.000417702	0	4.8663e-07	0	DNA mismatch repair protein MutL
K03574	0.000827957	0.000839839	0.0008503	0.000820719	0.00084148	0.00085228	0.000852347	0.000852023	0.000857732	0.000854701	0.000995445	0.000860314	0.000836048	0.00206986	0.00173244	0.000853549	0.000853063	0.000856797	8-oxo-dGTP diphosphatase [EC:3.6.1.55]
K03575	0	0	0	0	0	0	0	0	0	0	6.93031e-05	3.76115e-06	0	0.000587739	0.000417702	0	4.8663e-07	0	A/G-specific adenine glycosylase [EC:3.2.2.-]
K03592	0.000827957	0.000839551	0.000849524	0.000820719	0.00084148	0.00085228	0.000851776	0.000850775	0.000807033	0.000854701	0.000781235	0.000852792	0.000834914	0.000894386	0.000780624	0.00085283	0.000852089	0.000819433	PmbA protein
K03593	0.000827957	0.000839839	0.0008503	0.000820719	0.00084148	0.00085228	0.000852347	0.000852023	0.000857732	0.000854701	0.000856839	0.000852792	0.000836048	0.000894386	0.000897033	0.000853549	0.000852089	0.000856797	ATP-binding protein involved in chromosome partitioning
K03594	0	2.88307e-07	7.75939e-07	0	0	0	5.71182e-07	1.2482e-06	5.06989e-05	0	7.56034e-05	0	1.13439e-06	0	0.000116409	7.18677e-07	0	3.73639e-05	bacterioferritin [EC:1.16.3.1]
K03596	0	2.88307e-07	7.75939e-07	0	0	0	5.71182e-07	1.2482e-06	5.06989e-05	0	7.56034e-05	0	1.13439e-06	0	0.000116409	7.18677e-07	0	3.73639e-05	GTP-binding protein LepA
K03601	0	0	0	0	0	0	0	0	0	0	6.93031e-05	3.76115e-06	0	0.000587739	0.000417702	0	4.8663e-07	0	exodeoxyribonuclease VII large subunit [EC:3.1.11.6]
K03616	0	0	0	0	0	0	0	0	0	0	6.93031e-05	3.76115e-06	0	0.000587739	0.000417702	0	4.8663e-07	0	electron transport complex protein RnfB
K03622	0.00271394	0.00264738	0.00258879	0.0027545	0.00263818	0.00257766	0.00257732	0.00257916	0.00254936	0.0025641	0.00245711	0.00256946	0.00266866	0.00150768	0.00173929	0.00257059	0.00257804	0.00255401	archaea-specific DNA-binding protein
K03626	0.000827957	0.000839839	0.0008503	0.000820719	0.00084148	0.00085228	0.000852347	0.000852023	0.000857732	0.000854701	0.000787536	0.000849031	0.000836048	0.000306647	0.000479331	0.000853549	0.000851603	0.000856797	nascent polypeptide-associated complex subunit alpha
K03635	0	0	0	0	0	0	0	0	0	0	6.93031e-05	3.76115e-06	0	0.000587739	0.000417702	0	4.8663e-07	0	molybdopterin synthase catalytic subunit [EC:2.8.1.12]
K03636	0.000230072	0.000128153	3.86676e-05	0.000292347	0.000113739	2.08236e-05	2.08482e-05	2.434e-05	2.68584e-05	0	0.000100805	1.86078e-05	0.000161651	0	0	1.06604e-05	2.275e-05	2.09833e-05	sulfur-carrier protein
K03637	0	0	0	0	0	0	0	0	0	0	6.93031e-05	3.76115e-06	0	0.000587739	0.000417702	0	4.8663e-07	0	cyclic pyranopterin monophosphate synthase [EC:4.6.1.17]
K03638	0	0	0	0	0	0	0	0	0	0	6.93031e-05	3.76115e-06	0	0.000587739	0.000417702	0	4.8663e-07	0	molybdenum cofactor biosynthesis protein B
K03639	0	0	0	0	0	0	0	0	0	0	6.93031e-05	3.76115e-06	0	0.000587739	0.000417702	0	4.8663e-07	0	GTP 3,8-cyclase [EC:4.1.99.22]
K03644	0	0	0	0	0	0	0	0	0	0	6.93031e-05	3.76115e-06	0	0.000587739	0.000417702	0	4.8663e-07	0	lipoyl synthase [EC:2.8.1.8]
K03652	0.000827957	0.000839839	0.0008503	0.000820719	0.00084148	0.00085228	0.000852347	0.000852023	0.000857732	0.000854701	0.000787536	0.000849031	0.000836048	0.000306647	0.000479331	0.000853549	0.000851603	0.000856797	DNA-3-methyladenine glycosylase [EC:3.2.2.21]
K03660	0.000827957	0.000839839	0.0008503	0.000820719	0.00084148	0.00085228	0.000852347	0.000852023	0.000857732	0.000854701	0.000787536	0.000849031	0.000836048	0.000306647	0.000479331	0.000853549	0.000851603	0.000856797	N-glycosylase/DNA lyase [EC:3.2.2.- 4.2.99.18]
K03665	0.000827957	0.000839839	0.0008503	0.000820719	0.00084148	0.00085228	0.000852347	0.000852023	0.000857732	0.000854701	0.000856839	0.000852792	0.000836048	0.000894386	0.000897033	0.000853549	0.000852089	0.000856797	GTPase
K03671	0.00165591	0.00167968	0.0017006	0.00164144	0.00168296	0.00170456	0.00170469	0.00170405	0.00171546	0.0017094	0.00171368	0.00170558	0.0016721	0.00178877	0.00179407	0.0017071	0.00170418	0.00171359	thioredoxin 1
K03672	0	0	0	0	0	0	0	0	0	0	0.000138606	7.52231e-06	0	0.00117548	0.000835405	0	9.7326e-07	0	thioredoxin 2 [EC:1.8.1.8]
K03676	0	0	0	0	0	0	0	0	0	0	0.000138606	7.52231e-06	0	0.00117548	0.000835405	0	9.7326e-07	0	glutaredoxin 3
K03679	0.000827957	0.000839839	0.0008503	0.000820719	0.00084148	0.00085228	0.000852347	0.000852023	0.000857732	0.000854701	0.000787536	0.000849031	0.000836048	0.000306647	0.000479331	0.000853549	0.000851603	0.000856797	exosome complex component RRP4
K03686	0.00234613	0.00206443	0.00181738	0.00251848	0.00202418	0.00176703	0.00176781	0.00177831	0.00184674	0.0017094	0.00209169	0.00176141	0.00215818	0.00178877	0.00191047	0.0017398	0.00177243	0.00181391	molecular chaperone DnaJ
K03687	0.000827957	0.000839839	0.0008503	0.000820719	0.00084148	0.00085228	0.000852347	0.000852023	0.000857732	0.000854701	0.000787536	0.000849031	0.000836048	0.000306647	0.000479331	0.000853549	0.000851603	0.000856797	molecular chaperone GrpE
K03688	0.00142584	0.00155124	0.00166116	0.00134909	0.00156922	0.00168374	0.00168327	0.00167846	0.00163791	0.0017094	0.00146797	0.00168321	0.00150931	0.00120103	0.00125995	0.00169572	0.00168094	0.00165525	ubiquinone biosynthesis protein
K03699	0.00165591	0.00167939	0.00169982	0.00164144	0.00168296	0.00170456	0.00170412	0.0017028	0.00166477	0.0017094	0.00156877	0.00170182	0.00167096	0.00120103	0.00125995	0.00170638	0.00170369	0.00167623	putative hemolysin
K03701	0.000827957	0.000839839	0.0008503	0.000820719	0.00084148	0.00085228	0.000852347	0.000852023	0.000857732	0.000854701	0.000856839	0.000852792	0.000836048	0.000894386	0.000897033	0.000853549	0.000852089	0.000856797	excinuclease ABC subunit A
K03702	0.000827957	0.000839839	0.0008503	0.000820719	0.00084148	0.00085228	0.000852347	0.000852023	0.000857732	0.000854701	0.000856839	0.000852792	0.000836048	0.000894386	0.000897033	0.000853549	0.000852089	0.000856797	excinuclease ABC subunit B
K03703	0.00105803	0.000967992	0.000888968	0.00111307	0.000955219	0.000873104	0.000873195	0.000876363	0.00088459	0.000854701	0.000957643	0.0008714	0.000997699	0.000894386	0.000897033	0.000864209	0.000874839	0.00087778	excinuclease ABC subunit C
K03704	0.000827957	0.000839839	0.0008503	0.000820719	0.00084148	0.00085228	0.000852347	0.000852023	0.000857732	0.000854701	0.000856839	0.000852792	0.000836048	0.000894386	0.000897033	0.000853549	0.000852089	0.000856797	cold shock protein (beta-ribbon, CspA family)
K03709	0.000827957	0.000840128	0.000851076	0.000820719	0.00084148	0.00085228	0.000852918	0.000853271	0.000908431	0.000854701	0.000932442	0.000852792	0.000837183	0.000894386	0.00101344	0.000854268	0.000852089	0.00089416	DtxR family transcriptional regulator, Mn-dependent transcriptional regulator
K03718	0.00211606	0.00193598	0.00177794	0.00222613	0.00191044	0.00174621	0.00174639	0.00175273	0.00176918	0.0017094	0.00177668	0.00173528	0.0019954	0.000613293	0.000958661	0.00172842	0.00174871	0.00175556	Lrp/AsnC family transcriptional regulator, regulator for asnA, asnC and gidA
K03719	0.00105803	0.000967704	0.000888192	0.00111307	0.000955219	0.000873104	0.000872624	0.000875115	0.000833891	0.000854701	0.00088204	0.0008714	0.000996565	0.000894386	0.000780624	0.000863491	0.000874839	0.000840416	Lrp/AsnC family transcriptional regulator, leucine-responsive regulatory protein
K03724	0.00142584	0.00155124	0.00166116	0.00134909	0.00156922	0.00168374	0.00168327	0.00167846	0.00163791	0.0017094	0.00153727	0.00168698	0.00150931	0.00178877	0.00167766	0.00169572	0.00168143	0.00165525	ATP-dependent helicase Lhr and Lhr-like helicase [EC:3.6.4.-]
K03726	0.000827957	0.000839839	0.0008503	0.000820719	0.00084148	0.00085228	0.000852347	0.000852023	0.000857732	0.000854701	0.000856839	0.000852792	0.000836048	0.000894386	0.000897033	0.000853549	0.000852089	0.000856797	helicase [EC:3.6.4.-]
K03732	0.000230072	0.000128441	3.94436e-05	0.000292347	0.000113739	2.08236e-05	2.14193e-05	2.55882e-05	7.75573e-05	0	0.000384317	2.98913e-05	0.000162786	0.00176322	0.00136952	1.13791e-05	2.42098e-05	5.83472e-05	ATP-dependent RNA helicase RhlB [EC:3.6.4.13]
K03737	0.000230072	0.000128153	3.86676e-05	0.000292347	0.000113739	2.08236e-05	2.08482e-05	2.434e-05	2.68584e-05	0	0.000100805	1.86078e-05	0.000161651	0	0	1.06604e-05	2.275e-05	2.09833e-05	pyruvate-ferredoxin/flavodoxin oxidoreductase [EC:1.2.7.1 1.2.7.-]
K03739	0.000230072	0.000128153	3.86676e-05	0.000292347	0.000113739	2.08236e-05	2.08482e-05	2.434e-05	2.68584e-05	0	0.000100805	1.86078e-05	0.000161651	0	0	1.06604e-05	2.275e-05	2.09833e-05	membrane protein involved in D-alanine export
K03741	0.000827957	0.000839839	0.0008503	0.000820719	0.00084148	0.00085228	0.000852347	0.000852023	0.000857732	0.000854701	0.000856839	0.000852792	0.000836048	0.000894386	0.000897033	0.000853549	0.000852089	0.000856797	arsenate reductase [EC:1.20.4.1]
K03742	0	0	0	0	0	0	0	0	0	0	6.93031e-05	3.76115e-06	0	0.000587739	0.000417702	0	4.8663e-07	0	nicotinamide-nucleotide amidase [EC:3.5.1.42]
K03743	0	0	0	0	0	0	0	0	0	0	6.93031e-05	3.76115e-06	0	0.000587739	0.000417702	0	4.8663e-07	0	nicotinamide-nucleotide amidase [EC:3.5.1.42]
K03744	0	0	0	0	0	0	0	0	0	0	6.93031e-05	3.76115e-06	0	0.000587739	0.000417702	0	4.8663e-07	0	LemA protein
K03750	0	0	0	0	0	0	0	0	0	0	6.93031e-05	3.76115e-06	0	0.000587739	0.000417702	0	4.8663e-07	0	molybdopterin molybdotransferase [EC:2.10.1.1]
K03752	0	0	0	0	0	0	0	0	0	0	6.93031e-05	3.76115e-06	0	0.000587739	0.000417702	0	4.8663e-07	0	molybdenum cofactor guanylyltransferase [EC:2.7.7.77]
K03767	0.00105803	0.000967992	0.000888968	0.00111307	0.000955219	0.000873104	0.000873195	0.000876363	0.00088459	0.000854701	0.00102695	0.000875161	0.000997699	0.00148213	0.00131474	0.000864209	0.000875326	0.00087778	peptidyl-prolyl cis-trans isomerase A (cyclophilin A) [EC:5.2.1.8]
K03768	0.00556563	0.00574986	0.00591111	0.00545268	0.00577662	0.00594514	0.00594387	0.00593608	0.00582517	0.00598291	0.00546235	0.00593965	0.00568728	0.00449748	0.0046769	0.00596203	0.00594042	0.0058645	peptidyl-prolyl cis-trans isomerase B (cyclophilin B) [EC:5.2.1.8]
K03769	0.000827957	0.000839839	0.0008503	0.000820719	0.00084148	0.00085228	0.000852347	0.000852023	0.000857732	0.000854701	0.000926142	0.000856553	0.000836048	0.00148213	0.00131474	0.000853549	0.000852576	0.000856797	peptidyl-prolyl cis-trans isomerase C [EC:5.2.1.8]
K03770	0.000827957	0.000839551	0.000849524	0.000820719	0.00084148	0.00085228	0.000851776	0.000850775	0.000807033	0.000854701	0.000711932	0.000849031	0.000834914	0.000306647	0.000362922	0.00085283	0.000851603	0.000819433	peptidyl-prolyl cis-trans isomerase D [EC:5.2.1.8]
K03771	0.000597885	0.000711399	0.000810857	0.000528372	0.000727741	0.000831457	0.000830927	0.000826435	0.000780175	0.000854701	0.000680431	0.000834184	0.000673263	0.000894386	0.000780624	0.00084217	0.000829339	0.000798449	peptidyl-prolyl cis-trans isomerase SurA [EC:5.2.1.8]
K03775	0.000597885	0.000711399	0.000810857	0.000528372	0.000727741	0.000831457	0.000830927	0.000826435	0.000780175	0.000854701	0.000749734	0.000837945	0.000673263	0.00148213	0.00119833	0.00084217	0.000829826	0.000798449	FKBP-type peptidyl-prolyl cis-trans isomerase SlyD [EC:5.2.1.8]
K03776	0.000690217	0.000384458	0.000116003	0.00087704	0.000341216	6.24708e-05	6.25445e-05	7.30199e-05	8.05751e-05	0	0.000302414	5.58234e-05	0.000484953	0	0	3.19811e-05	6.82499e-05	6.295e-05	aerotaxis receptor
K03778	0	2.88307e-07	7.75939e-07	0	0	0	5.71182e-07	1.2482e-06	5.06989e-05	0	7.56034e-05	0	1.13439e-06	0	0.000116409	7.18677e-07	0	3.73639e-05	D-lactate dehydrogenase [EC:1.1.1.28]
K03785	0.000827957	0.000839839	0.0008503	0.000820719	0.00084148	0.00085228	0.000852347	0.000852023	0.000857732	0.000854701	0.000787536	0.000849031	0.000836048	0.000306647	0.000479331	0.000853549	0.000851603	0.000856797	3-dehydroquinate dehydratase I [EC:4.2.1.10]
K03787	0	0	0	0	0	0	0	0	0	0	6.93031e-05	3.76115e-06	0	0.000587739	0.000417702	0	4.8663e-07	0	5-nucleotidase [EC:3.1.3.5]
K03789	0.000827957	0.000839839	0.0008503	0.000820719	0.00084148	0.00085228	0.000852347	0.000852023	0.000857732	0.000854701	0.000787536	0.000849031	0.000836048	0.000306647	0.000479331	0.000853549	0.000851603	0.000856797	ribosomal-protein-alanine N-acetyltransferase [EC:2.3.1.128]
K03798	0.00188599	0.00180754	0.00173849	0.00193378	0.0017967	0.00172538	0.00172497	0.00172714	0.00169162	0.0017094	0.00173888	0.00172419	0.00183261	0.00178877	0.00167766	0.00171704	0.00172693	0.00169721	cell division protease FtsH [EC:3.4.24.-]
K03801	0	0	0	0	0	0	0	0	0	0	6.93031e-05	3.76115e-06	0	0.000587739	0.000417702	0	4.8663e-07	0	lipoyl(octanoyl) transferase [EC:2.3.1.181]
K03809	0.000827957	0.000839551	0.000849524	0.000820719	0.00084148	0.00085228	0.000851776	0.000850775	0.000807033	0.000854701	0.000711932	0.000849031	0.000834914	0.000306647	0.000362922	0.00085283	0.000851603	0.000819433	NAD(P)H dehydrogenase (quinone) [EC:1.6.5.2]
K03821	0.000827957	0.000839551	0.000849524	0.000820719	0.00084148	0.00085228	0.000851776	0.000850775	0.000807033	0.000854701	0.000711932	0.000849031	0.000834914	0.000306647	0.000362922	0.00085283	0.000851603	0.000819433	polyhydroxyalkanoate synthase [EC:2.3.1.-]
K03831	0	0	0	0	0	0	0	0	0	0	6.93031e-05	3.76115e-06	0	0.000587739	0.000417702	0	4.8663e-07	0	molybdopterin adenylyltransferase [EC:2.7.7.75]
K03833	0.000827957	0.000839839	0.0008503	0.000820719	0.00084148	0.00085228	0.000852347	0.000852023	0.000857732	0.000854701	0.000787536	0.000849031	0.000836048	0.000306647	0.000479331	0.000853549	0.000851603	0.000856797	selenocysteine-specific elongation factor
K03839	0.000597885	0.000711687	0.000811633	0.000528372	0.000727741	0.000831457	0.000831499	0.000827683	0.000830874	0.000854701	0.000686731	0.000830423	0.000674397	0.000306647	0.000479331	0.000842889	0.000828853	0.000835813	flavodoxin I
K03885	0.0012881	0.00109614	0.000927636	0.00140541	0.00106896	0.000893928	0.000894043	0.000900703	0.000911449	0.000854701	0.000989145	0.000886246	0.00115935	0.000306647	0.000479331	0.00087487	0.000897103	0.000898763	NADH dehydrogenase [EC:1.6.99.3]
K03891	0	0	0	0	0	0	0	0	0	0	6.93031e-05	3.76115e-06	0	0.000587739	0.000417702	0	4.8663e-07	0	ubiquinol-cytochrome c reductase cytochrome b subunit
K03892	0.00142584	0.00155095	0.00166038	0.00134909	0.00156922	0.00168374	0.0016827	0.00167721	0.00158721	0.0017094	0.00132306	0.00167945	0.00150818	0.000613293	0.000725843	0.001695	0.00168046	0.00161788	ArsR family transcriptional regulator, arsenate/arsenite/antimonite-responsive transcriptional repressor
K03923	0.000597885	0.000711399	0.000810857	0.000528372	0.000727741	0.000831457	0.000830927	0.000826435	0.000780175	0.000854701	0.000611128	0.000830423	0.000673263	0.000306647	0.000362922	0.00084217	0.000828853	0.000798449	modulator of drug activity B
K03924	0.000597885	0.000711687	0.000811633	0.000528372	0.000727741	0.000831457	0.000831499	0.000827683	0.000830874	0.000854701	0.000825337	0.000837945	0.000674397	0.00148213	0.00131474	0.000842889	0.000829826	0.000835813	MoxR-like ATPase [EC:3.6.3.-]
K03926	0.000827957	0.000839839	0.0008503	0.000820719	0.00084148	0.00085228	0.000852347	0.000852023	0.000857732	0.000854701	0.000856839	0.000852792	0.000836048	0.000894386	0.000897033	0.000853549	0.000852089	0.000856797	periplasmic divalent cation tolerance protein
K03972	0	0	0	0	0	0	0	0	0	0	6.93031e-05	3.76115e-06	0	0.000587739	0.000417702	0	4.8663e-07	0	phage shock protein E
K03977	0.000230072	0.000128153	3.86676e-05	0.000292347	0.000113739	2.08236e-05	2.08482e-05	2.434e-05	2.68584e-05	0	0.000100805	1.86078e-05	0.000161651	0	0	1.06604e-05	2.275e-05	2.09833e-05	GTPase
K03979	0	0	0	0	0	0	0	0	0	0	6.93031e-05	3.76115e-06	0	0.000587739	0.000417702	0	4.8663e-07	0	GTPase [EC:3.6.5.-]
K04042	0.000460145	0.000256305	7.73353e-05	0.000584693	0.000227478	4.16472e-05	4.16963e-05	4.86799e-05	5.37167e-05	0	0.000270912	4.09768e-05	0.000323302	0.000587739	0.000417702	2.13208e-05	4.59865e-05	4.19666e-05	bifunctional UDP-N-acetylglucosamine pyrophosphorylase / Glucosamine-1-phosphate N-acetyltransferase [EC:2.7.7.23 2.3.1.157]
K04043	0.000827957	0.000839839	0.0008503	0.000820719	0.00084148	0.00085228	0.000852347	0.000852023	0.000857732	0.000854701	0.000856839	0.000852792	0.000836048	0.000894386	0.000897033	0.000853549	0.000852089	0.000856797	molecular chaperone DnaK
K04045	0	2.88307e-07	7.75939e-07	0	0	0	5.71182e-07	1.2482e-06	5.06989e-05	0	0.000144907	3.76115e-06	1.13439e-06	0.000587739	0.000534111	7.18677e-07	4.8663e-07	3.73639e-05	molecular chaperone HscC
K04047	0.000230072	0.000128153	3.86676e-05	0.000292347	0.000113739	2.08236e-05	2.08482e-05	2.434e-05	2.68584e-05	0	0.000100805	1.86078e-05	0.000161651	0	0	1.06604e-05	2.275e-05	2.09833e-05	starvation-inducible DNA-binding protein
K04069	0.000597885	0.000711399	0.000810857	0.000528372	0.000727741	0.000831457	0.000830927	0.000826435	0.000780175	0.000854701	0.000611128	0.000830423	0.000673263	0.000306647	0.000362922	0.00084217	0.000828853	0.000798449	pyruvate formate lyase activating enzyme [EC:1.97.1.4]
K04075	0.000230072	0.000128441	3.94436e-05	0.000292347	0.000113739	2.08236e-05	2.14193e-05	2.55882e-05	7.75573e-05	0	0.000176408	1.86078e-05	0.000162786	0	0.000116409	1.13791e-05	2.275e-05	5.83472e-05	tRNA(Ile)-lysidine synthase [EC:6.3.4.19]
K04076	0	0	0	0	0	0	0	0	0	0	6.93031e-05	3.76115e-06	0	0.000587739	0.000417702	0	4.8663e-07	0	ATP-dependent Lon protease [EC:3.4.21.53]
K04085	0.000827957	0.000839839	0.0008503	0.000820719	0.00084148	0.00085228	0.000852347	0.000852023	0.000857732	0.000854701	0.000787536	0.000849031	0.000836048	0.000306647	0.000479331	0.000853549	0.000851603	0.000856797	tRNA 2-thiouridine synthesizing protein A [EC:2.8.1.-]
K04108	0	0	0	0	0	0	0	0	0	0	6.93031e-05	3.76115e-06	0	0.000587739	0.000417702	0	4.8663e-07	0	4-hydroxybenzoyl-CoA reductase subunit alpha [EC:1.3.7.9]
K04109	0	0	0	0	0	0	0	0	0	0	6.93031e-05	3.76115e-06	0	0.000587739	0.000417702	0	4.8663e-07	0	4-hydroxybenzoyl-CoA reductase subunit beta [EC:1.3.7.9]
K04127	0	0	0	0	0	0	0	0	0	0	6.93031e-05	3.76115e-06	0	0.000587739	0.000417702	0	4.8663e-07	0	isopenicillin-N epimerase [EC:5.1.1.17]
K04479	0.000827957	0.000839839	0.0008503	0.000820719	0.00084148	0.00085228	0.000852347	0.000852023	0.000857732	0.000854701	0.000787536	0.000849031	0.000836048	0.000306647	0.000479331	0.000853549	0.000851603	0.000856797	DNA polymerase IV (archaeal DinB-like DNA polymerase) [EC:2.7.7.7]
K04482	0.000827957	0.000839839	0.0008503	0.000820719	0.00084148	0.00085228	0.000852347	0.000852023	0.000857732	0.000854701	0.000787536	0.000849031	0.000836048	0.000306647	0.000479331	0.000853549	0.000851603	0.000856797	DNA repair protein RAD51
K04483	0.000827957	0.000839839	0.0008503	0.000820719	0.00084148	0.00085228	0.000852347	0.000852023	0.000857732	0.000854701	0.000856839	0.000852792	0.000836048	0.000894386	0.000897033	0.000853549	0.000852089	0.000856797	DNA repair protein RadA
K04484	0	0	0	0	0	0	0	0	0	0	6.93031e-05	3.76115e-06	0	0.000587739	0.000417702	0	4.8663e-07	0	DNA repair protein RadB
K04487	0.000827957	0.000839551	0.000849524	0.000820719	0.00084148	0.00085228	0.000851776	0.000850775	0.000807033	0.000854701	0.000781235	0.000852792	0.000834914	0.000894386	0.000780624	0.00085283	0.000852089	0.000819433	cysteine desulfurase [EC:2.8.1.7]
K04488	0.000827957	0.000839839	0.0008503	0.000820719	0.00084148	0.00085228	0.000852347	0.000852023	0.000857732	0.000854701	0.000787536	0.000849031	0.000836048	0.000306647	0.000479331	0.000853549	0.000851603	0.000856797	nitrogen fixation protein NifU and related proteins
K04517	0.000827957	0.000839839	0.0008503	0.000820719	0.00084148	0.00085228	0.000852347	0.000852023	0.000857732	0.000854701	0.000787536	0.000849031	0.000836048	0.000306647	0.000479331	0.000853549	0.000851603	0.000856797	prephenate dehydrogenase [EC:1.3.1.12]
K04518	0.000827957	0.000839839	0.0008503	0.000820719	0.00084148	0.00085228	0.000852347	0.000852023	0.000857732	0.000854701	0.000787536	0.000849031	0.000836048	0.000306647	0.000479331	0.000853549	0.000851603	0.000856797	prephenate dehydratase [EC:4.2.1.51]
K04564	0.00188599	0.00180754	0.00173849	0.00193378	0.0017967	0.00172538	0.00172497	0.00172714	0.00169162	0.0017094	0.00160027	0.00171667	0.00183261	0.000613293	0.000842252	0.00171704	0.00172596	0.00169721	superoxide dismutase, Fe-Mn family [EC:1.15.1.1]
K04566	0.000827957	0.000839839	0.0008503	0.000820719	0.00084148	0.00085228	0.000852347	0.000852023	0.000857732	0.000854701	0.000856839	0.000852792	0.000836048	0.000894386	0.000897033	0.000853549	0.000852089	0.000856797	lysyl-tRNA synthetase, class I [EC:6.1.1.6]
K04719	0.000827957	0.000839839	0.0008503	0.000820719	0.00084148	0.00085228	0.000852347	0.000852023	0.000857732	0.000854701	0.000787536	0.000849031	0.000836048	0.000306647	0.000479331	0.000853549	0.000851603	0.000856797	5,6-dimethylbenzimidazole synthase [EC:1.13.11.79]
K04720	0.000827957	0.000840128	0.000851076	0.000820719	0.00084148	0.00085228	0.000852918	0.000853271	0.000908431	0.000854701	0.000863139	0.000849031	0.000837183	0.000306647	0.000595739	0.000854268	0.000851603	0.00089416	threonine-phosphate decarboxylase [EC:4.1.1.81]
K04748	0.000827957	0.000839839	0.0008503	0.000820719	0.00084148	0.00085228	0.000852347	0.000852023	0.000857732	0.000854701	0.000787536	0.000849031	0.000836048	0.000306647	0.000479331	0.000853549	0.000851603	0.000856797	nitric oxide reductase NorQ protein
K04751	0.0035419	0.00348693	0.00343832	0.00357522	0.00347966	0.00342994	0.00342909	0.00342994	0.00335639	0.0034188	0.00309974	0.00341473	0.00350358	0.00122659	0.0016845	0.00342342	0.00342916	0.00337344	nitrogen regulatory protein P-II 1
K04763	0.000597885	0.000711399	0.000810857	0.000528372	0.000727741	0.000831457	0.000830927	0.000826435	0.000780175	0.000854701	0.000680431	0.000834184	0.000673263	0.000894386	0.000780624	0.00084217	0.000829339	0.000798449	integrase/recombinase XerD
K04771	0.0022538	0.00239079	0.00251068	0.00216981	0.0024107	0.00253602	0.00253505	0.00252923	0.00244494	0.0025641	0.0021106	0.00252848	0.00234423	0.00091994	0.00120517	0.00254855	0.00253206	0.00247468	serine protease Do [EC:3.4.21.107]
K04772	0.00142584	0.00155095	0.00166038	0.00134909	0.00156922	0.00168374	0.0016827	0.00167721	0.00158721	0.0017094	0.00132306	0.00167945	0.00150818	0.000613293	0.000725843	0.001695	0.00168046	0.00161788	serine protease DegQ [EC:3.4.21.-]
K04789	0.000230072	0.000128153	3.86676e-05	0.000292347	0.000113739	2.08236e-05	2.08482e-05	2.434e-05	2.68584e-05	0	0.000100805	1.86078e-05	0.000161651	0	0	1.06604e-05	2.275e-05	2.09833e-05	mycobactin peptide synthetase MbtE
K04794	0.000827957	0.000839839	0.0008503	0.000820719	0.00084148	0.00085228	0.000852347	0.000852023	0.000857732	0.000854701	0.000926142	0.000856553	0.000836048	0.00148213	0.00131474	0.000853549	0.000852576	0.000856797	peptidyl-tRNA hydrolase, PTH2 family [EC:3.1.1.29]
K04795	0.000827957	0.000839839	0.0008503	0.000820719	0.00084148	0.00085228	0.000852347	0.000852023	0.000857732	0.000854701	0.000787536	0.000849031	0.000836048	0.000306647	0.000479331	0.000853549	0.000851603	0.000856797	fibrillarin-like pre-rRNA processing protein
K04796	0.00248387	0.00251923	0.00255013	0.00246216	0.00252444	0.00255684	0.00255647	0.00255482	0.0025225	0.0025641	0.002287	0.00254709	0.00250701	0.00091994	0.00132158	0.00255993	0.00255481	0.00253303	small nuclear ribonucleoprotein
K04797	0.000827957	0.000839839	0.0008503	0.000820719	0.00084148	0.00085228	0.000852347	0.000852023	0.000857732	0.000854701	0.000787536	0.000849031	0.000836048	0.000306647	0.000479331	0.000853549	0.000851603	0.000856797	prefoldin alpha subunit
K04798	0.000827957	0.000839839	0.0008503	0.000820719	0.00084148	0.00085228	0.000852347	0.000852023	0.000857732	0.000854701	0.000787536	0.000849031	0.000836048	0.000306647	0.000479331	0.000853549	0.000851603	0.000856797	prefoldin beta subunit
K04799	0.000827957	0.000839839	0.0008503	0.000820719	0.00084148	0.00085228	0.000852347	0.000852023	0.000857732	0.000854701	0.000856839	0.000852792	0.000836048	0.000894386	0.000897033	0.000853549	0.000852089	0.000856797	flap endonuclease-1 [EC:3.-.-.-]
K04800	0.000827957	0.000840128	0.000851076	0.000820719	0.00084148	0.00085228	0.000852918	0.000853271	0.000908431	0.000854701	0.00100175	0.000856553	0.000837183	0.00148213	0.00143114	0.000854268	0.000852576	0.00089416	replication factor C large subunit
K04801	0.000827957	0.000839839	0.0008503	0.000820719	0.00084148	0.00085228	0.000852347	0.000852023	0.000857732	0.000854701	0.000926142	0.000856553	0.000836048	0.00148213	0.00131474	0.000853549	0.000852576	0.000856797	replication factor C small subunit
K04802	0.000827957	0.000839839	0.0008503	0.000820719	0.00084148	0.00085228	0.000852347	0.000852023	0.000857732	0.000854701	0.000787536	0.000849031	0.000836048	0.000306647	0.000479331	0.000853549	0.000851603	0.000856797	proliferating cell nuclear antigen
K05337	0	0	0	0	0	0	0	0	0	0	6.93031e-05	3.76115e-06	0	0.000587739	0.000417702	0	4.8663e-07	0	ferredoxin
K05350	0	0	0	0	0	0	0	0	0	0	6.93031e-05	3.76115e-06	0	0.000587739	0.000417702	0	4.8663e-07	0	beta-glucosidase [EC:3.2.1.21]
K05516	0.00105803	0.000967992	0.000888968	0.00111307	0.000955219	0.000873104	0.000873195	0.000876363	0.00088459	0.000854701	0.00102695	0.000875161	0.000997699	0.00148213	0.00131474	0.000864209	0.000875326	0.00087778	curved DNA-binding protein
K05522	0	0	0	0	0	0	0	0	0	0	6.93031e-05	3.76115e-06	0	0.000587739	0.000417702	0	4.8663e-07	0	endonuclease VIII [EC:3.2.2.- 4.2.99.18]
K05524	0.000827957	0.000839839	0.0008503	0.000820719	0.00084148	0.00085228	0.000852347	0.000852023	0.000857732	0.000854701	0.000856839	0.000852792	0.000836048	0.000894386	0.000897033	0.000853549	0.000852089	0.000856797	ferredoxin
K05540	0.000827957	0.000839839	0.0008503	0.000820719	0.00084148	0.00085228	0.000852347	0.000852023	0.000857732	0.000854701	0.000856839	0.000852792	0.000836048	0.000894386	0.000897033	0.000853549	0.000852089	0.000856797	tRNA-dihydrouridine synthase B [EC:1.-.-.-]
K05541	0.000597885	0.000711399	0.000810857	0.000528372	0.000727741	0.000831457	0.000830927	0.000826435	0.000780175	0.000854701	0.000680431	0.000834184	0.000673263	0.000894386	0.000780624	0.00084217	0.000829339	0.000798449	tRNA-dihydrouridine synthase C [EC:1.-.-.-]
K05565	0.000827957	0.000839551	0.000849524	0.000820719	0.00084148	0.00085228	0.000851776	0.000850775	0.000807033	0.000854701	0.000781235	0.000852792	0.000834914	0.000894386	0.000780624	0.00085283	0.000852089	0.000819433	multicomponent Na+:H+ antiporter subunit A
K05568	0.000230072	0.000128153	3.86676e-05	0.000292347	0.000113739	2.08236e-05	2.08482e-05	2.434e-05	2.68584e-05	0	0.000100805	1.86078e-05	0.000161651	0	0	1.06604e-05	2.275e-05	2.09833e-05	multicomponent Na+:H+ antiporter subunit D
K05575	0	0	0	0	0	0	0	0	0	0	6.93031e-05	3.76115e-06	0	0.000587739	0.000417702	0	4.8663e-07	0	NAD(P)H-quinone oxidoreductase subunit 4 [EC:1.6.5.3]
K05576	0	0	0	0	0	0	0	0	0	0	6.93031e-05	3.76115e-06	0	0.000587739	0.000417702	0	4.8663e-07	0	NAD(P)H-quinone oxidoreductase subunit 4L [EC:1.6.5.3]
K05590	0	2.88307e-07	7.75939e-07	0	0	0	5.71182e-07	1.2482e-06	5.06989e-05	0	7.56034e-05	0	1.13439e-06	0	0.000116409	7.18677e-07	0	3.73639e-05	ATP-dependent RNA helicase SrmB [EC:3.6.4.13]
K05591	0	0	0	0	0	0	0	0	0	0	0.000207909	1.12835e-05	0	0.00176322	0.00125311	0	1.45989e-06	0	ATP-independent RNA helicase DbpA [EC:3.6.4.13]
K05592	0.000827957	0.000839839	0.0008503	0.000820719	0.00084148	0.00085228	0.000852347	0.000852023	0.000857732	0.000854701	0.000995445	0.000860314	0.000836048	0.00206986	0.00173244	0.000853549	0.000853063	0.000856797	ATP-dependent RNA helicase DeaD [EC:3.6.4.13]
K05606	0.000827957	0.000840128	0.000851076	0.000820719	0.00084148	0.00085228	0.000852918	0.000853271	0.000908431	0.000854701	0.000932442	0.000852792	0.000837183	0.000894386	0.00101344	0.000854268	0.000852089	0.00089416	methylmalonyl-CoA/ethylmalonyl-CoA epimerase [EC:5.1.99.1]
K05685	0	0	0	0	0	0	0	0	0	0	6.93031e-05	3.76115e-06	0	0.000587739	0.000417702	0	4.8663e-07	0	macrolide transport system ATP-binding/permease protein [EC:3.6.3.-]
K05710	0.00188599	0.00180812	0.00174004	0.00193378	0.0017967	0.00172538	0.00172611	0.00172963	0.00179302	0.0017094	0.00175148	0.00171667	0.00183488	0.000613293	0.00107507	0.00171848	0.00172596	0.00177194	3-phenylpropionate/trans-cinnamate dioxygenase ferredoxin component
K05776	0	0	0	0	0	0	0	0	0	0	6.93031e-05	3.76115e-06	0	0.000587739	0.000417702	0	4.8663e-07	0	molybdate transport system ATP-binding protein
K05802	0.00105803	0.000967992	0.000888968	0.00111307	0.000955219	0.000873104	0.000873195	0.000876363	0.00088459	0.000854701	0.00088834	0.000867639	0.000997699	0.000306647	0.000479331	0.000864209	0.000874353	0.00087778	potassium-dependent mechanosensitive channel
K05826	0.00165591	0.00167968	0.0017006	0.00164144	0.00168296	0.00170456	0.00170469	0.00170405	0.00171546	0.0017094	0.00157507	0.00169806	0.0016721	0.000613293	0.000958661	0.0017071	0.00170321	0.00171359	alpha-aminoadipate/glutamate carrier protein LysW
K05827	0.00165591	0.00167968	0.0017006	0.00164144	0.00168296	0.00170456	0.00170469	0.00170405	0.00171546	0.0017094	0.00157507	0.00169806	0.0016721	0.000613293	0.000958661	0.0017071	0.00170321	0.00171359	[lysine-biosynthesis-protein LysW]---L-2-aminoadipate ligase [EC:6.3.2.43]
K05828	0.000827957	0.000839839	0.0008503	0.000820719	0.00084148	0.00085228	0.000852347	0.000852023	0.000857732	0.000854701	0.000787536	0.000849031	0.000836048	0.000306647	0.000479331	0.000853549	0.000851603	0.000856797	LysW-gamma-L-alpha-aminoadipate/LysW-L-glutamate kinase [EC:2.7.2.-]
K05829	0.000827957	0.000839839	0.0008503	0.000820719	0.00084148	0.00085228	0.000852347	0.000852023	0.000857732	0.000854701	0.000787536	0.000849031	0.000836048	0.000306647	0.000479331	0.000853549	0.000851603	0.000856797	LysW-gamma-L-alpha-aminoadipyl-6-phosphate/LysW-L-glutamyl-5-phosphate reductase [EC:1.2.1.-]
K05830	0.00142584	0.00155124	0.00166116	0.00134909	0.00156922	0.00168374	0.00168327	0.00167846	0.00163791	0.0017094	0.00139866	0.00167945	0.00150931	0.000613293	0.000842252	0.00169572	0.00168046	0.00165525	LysW-gamma-L-lysine/LysW-L-ornithine aminotransferase [EC:2.6.1.-]
K05831	0.000827957	0.000839839	0.0008503	0.000820719	0.00084148	0.00085228	0.000852347	0.000852023	0.000857732	0.000854701	0.000787536	0.000849031	0.000836048	0.000306647	0.000479331	0.000853549	0.000851603	0.000856797	LysW-gamma-L-lysine/LysW-L-ornithine carboxypeptidase
K05833	0	0	0	0	0	0	0	0	0	0	6.93031e-05	3.76115e-06	0	0.000587739	0.000417702	0	4.8663e-07	0	putative ABC transport system ATP-binding protein
K05838	0	0	0	0	0	0	0	0	0	0	0.000138606	7.52231e-06	0	0.00117548	0.000835405	0	9.7326e-07	0	putative thioredoxin
K05844	0	2.88307e-07	7.75939e-07	0	0	0	5.71182e-07	1.2482e-06	5.06989e-05	0	0.000144907	3.76115e-06	1.13439e-06	0.000587739	0.000534111	7.18677e-07	4.8663e-07	3.73639e-05	ribosomal protein S6--L-glutamate ligase [EC:6.3.2.-]
K05896	0.000827957	0.000839839	0.0008503	0.000820719	0.00084148	0.00085228	0.000852347	0.000852023	0.000857732	0.000854701	0.000787536	0.000849031	0.000836048	0.000306647	0.000479331	0.000853549	0.000851603	0.000856797	segregation and condensation protein A
K05934	0.000827957	0.000839839	0.0008503	0.000820719	0.00084148	0.00085228	0.000852347	0.000852023	0.000857732	0.000854701	0.000787536	0.000849031	0.000836048	0.000306647	0.000479331	0.000853549	0.000851603	0.000856797	precorrin-3B C17-methyltransferase [EC:2.1.1.131]
K05936	0.000827957	0.000839839	0.0008503	0.000820719	0.00084148	0.00085228	0.000852347	0.000852023	0.000857732	0.000854701	0.000787536	0.000849031	0.000836048	0.000306647	0.000479331	0.000853549	0.000851603	0.000856797	precorrin-4/cobalt-precorrin-4 C11-methyltransferase [EC:2.1.1.133 2.1.1.271]
K05967	0.000827957	0.000839551	0.000849524	0.000820719	0.00084148	0.00085228	0.000851776	0.000850775	0.000807033	0.000854701	0.000711932	0.000849031	0.000834914	0.000306647	0.000362922	0.00085283	0.000851603	0.000819433	uncharacterized protein
K05996	0	0	0	0	0	0	0	0	0	0	6.93031e-05	3.76115e-06	0	0.000587739	0.000417702	0	4.8663e-07	0	carboxypeptidase T [EC:3.4.17.18]
K06020	0	0	0	0	0	0	0	0	0	0	6.93031e-05	3.76115e-06	0	0.000587739	0.000417702	0	4.8663e-07	0	sulfate-transporting ATPase [EC:3.6.3.25]
K06024	0.000827957	0.000839839	0.0008503	0.000820719	0.00084148	0.00085228	0.000852347	0.000852023	0.000857732	0.000854701	0.000856839	0.000852792	0.000836048	0.000894386	0.000897033	0.000853549	0.000852089	0.000856797	segregation and condensation protein B
K06039	0	0	0	0	0	0	0	0	0	0	6.93031e-05	3.76115e-06	0	0.000587739	0.000417702	0	4.8663e-07	0	uncharacterized protein involved in oxidation of intracellular sulfur
K06042	0.00142584	0.00155124	0.00166116	0.00134909	0.00156922	0.00168374	0.00168327	0.00167846	0.00163791	0.0017094	0.00139866	0.00167945	0.00150931	0.000613293	0.000842252	0.00169572	0.00168046	0.00165525	precorrin-8X/cobalt-precorrin-8 methylmutase [EC:5.4.99.61 5.4.99.60]
K06072	0.000827957	0.000839839	0.0008503	0.000820719	0.00084148	0.00085228	0.000852347	0.000852023	0.000857732	0.000854701	0.000787536	0.000849031	0.000836048	0.000306647	0.000479331	0.000853549	0.000851603	0.000856797	deoxyhypusine monooxygenase [EC:1.14.99.29]
K06136	0	0	0	0	0	0	0	0	0	0	6.93031e-05	3.76115e-06	0	0.000587739	0.000417702	0	4.8663e-07	0	pyrroloquinoline quinone biosynthesis protein B
K06137	0.000827957	0.000839839	0.0008503	0.000820719	0.00084148	0.00085228	0.000852347	0.000852023	0.000857732	0.000854701	0.000787536	0.000849031	0.000836048	0.000306647	0.000479331	0.000853549	0.000851603	0.000856797	pyrroloquinoline-quinone synthase [EC:1.3.3.11]
K06147	0.00105803	0.00096828	0.000889744	0.00111307	0.000955219	0.000873104	0.000873766	0.000877611	0.000935289	0.000854701	0.00110255	0.000875161	0.000998834	0.00148213	0.00143114	0.000864928	0.000875326	0.000915144	ATP-binding cassette, subfamily B, bacterial
K06148	0.000230072	0.000128153	3.86676e-05	0.000292347	0.000113739	2.08236e-05	2.08482e-05	2.434e-05	2.68584e-05	0	0.000170108	2.2369e-05	0.000161651	0.000587739	0.000417702	1.06604e-05	2.32366e-05	2.09833e-05	ATP-binding cassette, subfamily C, bacterial
K06149	0.00174825	0.00135216	0.00100419	0.00199011	0.00129643	0.000935575	0.000935168	0.000948135	0.000914467	0.000854701	0.00111515	0.000923462	0.00148152	0.000306647	0.000362922	0.000895472	0.000942602	0.000903366	universal stress protein A
K06158	0	0	0	0	0	0	0	0	0	0	0.000207909	1.12835e-05	0	0.00176322	0.00125311	0	1.45989e-06	0	ATP-binding cassette, subfamily F, member 3
K06168	0.000827957	0.000839839	0.0008503	0.000820719	0.00084148	0.00085228	0.000852347	0.000852023	0.000857732	0.000854701	0.000787536	0.000849031	0.000836048	0.000306647	0.000479331	0.000853549	0.000851603	0.000856797	tRNA-2-methylthio-N6-dimethylallyladenosine synthase [EC:2.8.4.3]
K06173	0	0	0	0	0	0	0	0	0	0	6.93031e-05	3.76115e-06	0	0.000587739	0.000417702	0	4.8663e-07	0	tRNA pseudouridine38-40 synthase [EC:5.4.99.12]
K06174	0.000827957	0.000839839	0.0008503	0.000820719	0.00084148	0.00085228	0.000852347	0.000852023	0.000857732	0.000854701	0.000856839	0.000852792	0.000836048	0.000894386	0.000897033	0.000853549	0.000852089	0.000856797	ATP-binding cassette, sub-family E, member 1
K06176	0.00105803	0.000967992	0.000888968	0.00111307	0.000955219	0.000873104	0.000873195	0.000876363	0.00088459	0.000854701	0.000957643	0.0008714	0.000997699	0.000894386	0.000897033	0.000864209	0.000874839	0.00087778	tRNA pseudouridine13 synthase [EC:5.4.99.27]
K06177	0	0	0	0	0	0	0	0	0	0	6.93031e-05	3.76115e-06	0	0.000587739	0.000417702	0	4.8663e-07	0	tRNA pseudouridine32 synthase / 23S rRNA pseudouridine746 synthase [EC:5.4.99.28 5.4.99.29]
K06178	0.000230072	0.000128153	3.86676e-05	0.000292347	0.000113739	2.08236e-05	2.08482e-05	2.434e-05	2.68584e-05	0	0.000170108	2.2369e-05	0.000161651	0.000587739	0.000417702	1.06604e-05	2.32366e-05	2.09833e-05	23S rRNA pseudouridine2605 synthase [EC:5.4.99.22]
K06180	0	0	0	0	0	0	0	0	0	0	6.93031e-05	3.76115e-06	0	0.000587739	0.000417702	0	4.8663e-07	0	23S rRNA pseudouridine1911/1915/1917 synthase [EC:5.4.99.23]
K06182	0	0	0	0	0	0	0	0	0	0	6.93031e-05	3.76115e-06	0	0.000587739	0.000417702	0	4.8663e-07	0	23S rRNA pseudouridine2604 synthase [EC:5.4.99.21]
K06183	0	0	0	0	0	0	0	0	0	0	6.93031e-05	3.76115e-06	0	0.000587739	0.000417702	0	4.8663e-07	0	16S rRNA pseudouridine516 synthase [EC:5.4.99.19]
K06188	0.00165591	0.00167968	0.0017006	0.00164144	0.00168296	0.00170456	0.00170469	0.00170405	0.00171546	0.0017094	0.00164437	0.00170182	0.0016721	0.00120103	0.00137636	0.0017071	0.00170369	0.00171359	aquaporin Z
K06189	0.00165591	0.00167939	0.00169982	0.00164144	0.00168296	0.00170456	0.00170412	0.0017028	0.00166477	0.0017094	0.00156877	0.00170182	0.00167096	0.00120103	0.00125995	0.00170638	0.00170369	0.00167623	magnesium and cobalt transporter
K06196	0.00165591	0.00167968	0.0017006	0.00164144	0.00168296	0.00170456	0.00170469	0.00170405	0.00171546	0.0017094	0.00157507	0.00169806	0.0016721	0.000613293	0.000958661	0.0017071	0.00170321	0.00171359	cytochrome c-type biogenesis protein
K06199	0.000827957	0.000839551	0.000849524	0.000820719	0.00084148	0.00085228	0.000851776	0.000850775	0.000807033	0.000854701	0.000781235	0.000852792	0.000834914	0.000894386	0.000780624	0.00085283	0.000852089	0.000819433	fluoride exporter
K06205	0	0	0	0	0	0	0	0	0	0	6.93031e-05	3.76115e-06	0	0.000587739	0.000417702	0	4.8663e-07	0	MioC protein
K06207	0	0	0	0	0	0	0	0	0	0	6.93031e-05	3.76115e-06	0	0.000587739	0.000417702	0	4.8663e-07	0	GTP-binding protein
K06215	0.000827957	0.000839839	0.0008503	0.000820719	0.00084148	0.00085228	0.000852347	0.000852023	0.000857732	0.000854701	0.000856839	0.000852792	0.000836048	0.000894386	0.000897033	0.000853549	0.000852089	0.000856797	pyridoxal 5-phosphate synthase pdxS subunit [EC:4.3.3.6]
K06221	0	0	0	0	0	0	0	0	0	0	6.93031e-05	3.76115e-06	0	0.000587739	0.000417702	0	4.8663e-07	0	2,5-diketo-D-gluconate reductase A [EC:1.1.1.346]
K06222	0	0	0	0	0	0	0	0	0	0	6.93031e-05	3.76115e-06	0	0.000587739	0.000417702	0	4.8663e-07	0	2,5-diketo-D-gluconate reductase B [EC:1.1.1.346]
K06223	0.000827957	0.000839839	0.0008503	0.000820719	0.00084148	0.00085228	0.000852347	0.000852023	0.000857732	0.000854701	0.000787536	0.000849031	0.000836048	0.000306647	0.000479331	0.000853549	0.000851603	0.000856797	DNA adenine methylase [EC:2.1.1.72]
K06282	0.000827957	0.000839551	0.000849524	0.000820719	0.00084148	0.00085228	0.000851776	0.000850775	0.000807033	0.000854701	0.000711932	0.000849031	0.000834914	0.000306647	0.000362922	0.00085283	0.000851603	0.000819433	hydrogenase small subunit [EC:1.12.99.6]
K06287	0	0	0	0	0	0	0	0	0	0	6.93031e-05	3.76115e-06	0	0.000587739	0.000417702	0	4.8663e-07	0	septum formation protein
K06445	0	0	0	0	0	0	0	0	0	0	0.000138606	7.52231e-06	0	0.00117548	0.000835405	0	9.7326e-07	0	acyl-CoA dehydrogenase [EC:1.3.99.-]
K06446	0	0	0	0	0	0	0	0	0	0	6.93031e-05	3.76115e-06	0	0.000587739	0.000417702	0	4.8663e-07	0	acyl-CoA dehydrogenase [EC:1.3.99.-]
K06447	0.000230072	0.000128153	3.86676e-05	0.000292347	0.000113739	2.08236e-05	2.08482e-05	2.434e-05	2.68584e-05	0	0.000170108	2.2369e-05	0.000161651	0.000587739	0.000417702	1.06604e-05	2.32366e-05	2.09833e-05	succinylglutamic semialdehyde dehydrogenase [EC:1.2.1.71]
K06596	0.000230072	0.000128153	3.86676e-05	0.000292347	0.000113739	2.08236e-05	2.08482e-05	2.434e-05	2.68584e-05	0	0.000100805	1.86078e-05	0.000161651	0	0	1.06604e-05	2.275e-05	2.09833e-05	chemosensory pili system protein ChpA (sensor histidine kinase/response regulator)
K06607	0.000230072	0.000128153	3.86676e-05	0.000292347	0.000113739	2.08236e-05	2.08482e-05	2.434e-05	2.68584e-05	0	0.000100805	1.86078e-05	0.000161651	0	0	1.06604e-05	2.275e-05	2.09833e-05	myo-inositol catabolism protein IolS [EC:1.1.1.-]
K06718	0.000597885	0.000711399	0.000810857	0.000528372	0.000727741	0.000831457	0.000830927	0.000826435	0.000780175	0.000854701	0.000611128	0.000830423	0.000673263	0.000306647	0.000362922	0.00084217	0.000828853	0.000798449	L-2,4-diaminobutyric acid acetyltransferase [EC:2.3.1.178]
K06720	0.000597885	0.000711399	0.000810857	0.000528372	0.000727741	0.000831457	0.000830927	0.000826435	0.000780175	0.000854701	0.000611128	0.000830423	0.000673263	0.000306647	0.000362922	0.00084217	0.000828853	0.000798449	L-ectoine synthase [EC:4.2.1.108]
K06861	0	0	0	0	0	0	0	0	0	0	0.000207909	1.12835e-05	0	0.00176322	0.00125311	0	1.45989e-06	0	lipopolysaccharide export system ATP-binding protein [EC:3.6.3.-]
K06863	0.00165591	0.00167968	0.0017006	0.00164144	0.00168296	0.00170456	0.00170469	0.00170405	0.00171546	0.0017094	0.00171368	0.00170558	0.0016721	0.00178877	0.00179407	0.0017071	0.00170418	0.00171359	5-formaminoimidazole-4-carboxamide-1-(beta)-D-ribofuranosyl 5-monophosphate synthetase [EC:6.3.4.23]
K06864	0.00142584	0.00155124	0.00166116	0.00134909	0.00156922	0.00168374	0.00168327	0.00167846	0.00163791	0.0017094	0.00139866	0.00167945	0.00150931	0.000613293	0.000842252	0.00169572	0.00168046	0.00165525	uncharacterized protein
K06865	0.000827957	0.000839839	0.0008503	0.000820719	0.00084148	0.00085228	0.000852347	0.000852023	0.000857732	0.000854701	0.000856839	0.000852792	0.000836048	0.000894386	0.000897033	0.000853549	0.000852089	0.000856797	ATPase
K06869	0.00188599	0.00180783	0.00173927	0.00193378	0.0017967	0.00172538	0.00172554	0.00172839	0.00174232	0.0017094	0.00167588	0.00171667	0.00183375	0.000613293	0.000958661	0.00171776	0.00172596	0.00173458	uncharacterized protein
K06874	0	0	0	0	0	0	0	0	0	0	6.93031e-05	3.76115e-06	0	0.000587739	0.000417702	0	4.8663e-07	0	zinc finger protein
K06875	0.000827957	0.000839839	0.0008503	0.000820719	0.00084148	0.00085228	0.000852347	0.000852023	0.000857732	0.000854701	0.000787536	0.000849031	0.000836048	0.000306647	0.000479331	0.000853549	0.000851603	0.000856797	programmed cell death protein 5
K06876	0	2.88307e-07	7.75939e-07	0	0	0	5.71182e-07	1.2482e-06	5.06989e-05	0	0.000144907	3.76115e-06	1.13439e-06	0.000587739	0.000534111	7.18677e-07	4.8663e-07	3.73639e-05	deoxyribodipyrimidine photolyase-related protein
K06877	0.00105803	0.000967992	0.000888968	0.00111307	0.000955219	0.000873104	0.000873195	0.000876363	0.00088459	0.000854701	0.00088834	0.000867639	0.000997699	0.000306647	0.000479331	0.000864209	0.000874353	0.00087778	DEAD/DEAH box helicase domain-containing protein
K06878	0.000827957	0.000839839	0.0008503	0.000820719	0.00084148	0.00085228	0.000852347	0.000852023	0.000857732	0.000854701	0.000787536	0.000849031	0.000836048	0.000306647	0.000479331	0.000853549	0.000851603	0.000856797	tRNA-binding protein
K06883	0.000827957	0.000839839	0.0008503	0.000820719	0.00084148	0.00085228	0.000852347	0.000852023	0.000857732	0.000854701	0.000856839	0.000852792	0.000836048	0.000894386	0.000897033	0.000853549	0.000852089	0.000856797	uncharacterized protein
K06885	0.00142584	0.00155124	0.00166116	0.00134909	0.00156922	0.00168374	0.00168327	0.00167846	0.00163791	0.0017094	0.00146797	0.00168321	0.00150931	0.00120103	0.00125995	0.00169572	0.00168094	0.00165525	uncharacterized protein
K06888	0.000827957	0.000839839	0.0008503	0.000820719	0.00084148	0.00085228	0.000852347	0.000852023	0.000857732	0.000854701	0.000787536	0.000849031	0.000836048	0.000306647	0.000479331	0.000853549	0.000851603	0.000856797	uncharacterized protein
K06893	0.000460145	0.000256305	7.73353e-05	0.000584693	0.000227478	4.16472e-05	4.16963e-05	4.86799e-05	5.37167e-05	0	0.000201609	3.72156e-05	0.000323302	0	0	2.13208e-05	4.54999e-05	4.19666e-05	uncharacterized protein
K06897	0	0	0	0	0	0	0	0	0	0	6.93031e-05	3.76115e-06	0	0.000587739	0.000417702	0	4.8663e-07	0	7,8-dihydropterin-6-yl-methyl-4-(beta-D-ribofuranosyl)aminobenzene 5-phosphate synthase [EC:2.5.1.105]
K06898	0.000827957	0.000839839	0.0008503	0.000820719	0.00084148	0.00085228	0.000852347	0.000852023	0.000857732	0.000854701	0.000787536	0.000849031	0.000836048	0.000306647	0.000479331	0.000853549	0.000851603	0.000856797	uncharacterized protein
K06901	0.000230072	0.000128153	3.86676e-05	0.000292347	0.000113739	2.08236e-05	2.08482e-05	2.434e-05	2.68584e-05	0	0.000100805	1.86078e-05	0.000161651	0	0	1.06604e-05	2.275e-05	2.09833e-05	putative MFS transporter, AGZA family, xanthine/uracil permease
K06902	0	0	0	0	0	0	0	0	0	0	6.93031e-05	3.76115e-06	0	0.000587739	0.000417702	0	4.8663e-07	0	MFS transporter, UMF1 family
K06910	0.000827957	0.000839839	0.0008503	0.000820719	0.00084148	0.00085228	0.000852347	0.000852023	0.000857732	0.000854701	0.000787536	0.000849031	0.000836048	0.000306647	0.000479331	0.000853549	0.000851603	0.000856797	uncharacterized protein
K06911	0	0	0	0	0	0	0	0	0	0	6.93031e-05	3.76115e-06	0	0.000587739	0.000417702	0	4.8663e-07	0	uncharacterized protein
K06915	0.000827957	0.000839839	0.0008503	0.000820719	0.00084148	0.00085228	0.000852347	0.000852023	0.000857732	0.000854701	0.000856839	0.000852792	0.000836048	0.000894386	0.000897033	0.000853549	0.000852089	0.000856797	uncharacterized protein
K06917	0	0	0	0	0	0	0	0	0	0	6.93031e-05	3.76115e-06	0	0.000587739	0.000417702	0	4.8663e-07	0	tRNA 2-selenouridine synthase [EC:2.9.1.-]
K06920	0.000827957	0.000839839	0.0008503	0.000820719	0.00084148	0.00085228	0.000852347	0.000852023	0.000857732	0.000854701	0.000856839	0.000852792	0.000836048	0.000894386	0.000897033	0.000853549	0.000852089	0.000856797	7-cyano-7-deazaguanine synthase [EC:6.3.4.20]
K06928	0	0	0	0	0	0	0	0	0	0	6.93031e-05	3.76115e-06	0	0.000587739	0.000417702	0	4.8663e-07	0	nucleoside-triphosphatase [EC:3.6.1.15]
K06929	0.00142584	0.00155124	0.00166116	0.00134909	0.00156922	0.00168374	0.00168327	0.00167846	0.00163791	0.0017094	0.00139866	0.00167945	0.00150931	0.000613293	0.000842252	0.00169572	0.00168046	0.00165525	uncharacterized protein
K06932	0.00105803	0.000967992	0.000888968	0.00111307	0.000955219	0.000873104	0.000873195	0.000876363	0.00088459	0.000854701	0.00088834	0.000867639	0.000997699	0.000306647	0.000479331	0.000864209	0.000874353	0.00087778	tRNA(Ile2)-agmatinylcytidine synthase [EC:6.3.4.22]
K06936	0	0	0	0	0	0	0	0	0	0	6.93031e-05	3.76115e-06	0	0.000587739	0.000417702	0	4.8663e-07	0	uncharacterized protein
K06937	0.000827957	0.000839839	0.0008503	0.000820719	0.00084148	0.00085228	0.000852347	0.000852023	0.000857732	0.000854701	0.000787536	0.000849031	0.000836048	0.000306647	0.000479331	0.000853549	0.000851603	0.000856797	7,8-dihydro-6-hydroxymethylpterin dimethyltransferase [EC:2.1.1.-]
K06940	0.00165591	0.00167939	0.00169982	0.00164144	0.00168296	0.00170456	0.00170412	0.0017028	0.00166477	0.0017094	0.00149947	0.00169806	0.00167096	0.000613293	0.000842252	0.00170638	0.00170321	0.00167623	uncharacterized protein
K06941	0.000827957	0.000839839	0.0008503	0.000820719	0.00084148	0.00085228	0.000852347	0.000852023	0.000857732	0.000854701	0.000787536	0.000849031	0.000836048	0.000306647	0.000479331	0.000853549	0.000851603	0.000856797	23S rRNA (adenine2503-C2)-methyltransferase [EC:2.1.1.192]
K06942	0.00165591	0.00167968	0.0017006	0.00164144	0.00168296	0.00170456	0.00170469	0.00170405	0.00171546	0.0017094	0.00164437	0.00170182	0.0016721	0.00120103	0.00137636	0.0017071	0.00170369	0.00171359	ribosome-binding ATPase
K06943	0	0	0	0	0	0	0	0	0	0	6.93031e-05	3.76115e-06	0	0.000587739	0.000417702	0	4.8663e-07	0	nucleolar GTP-binding protein
K06944	0.000827957	0.000839839	0.0008503	0.000820719	0.00084148	0.00085228	0.000852347	0.000852023	0.000857732	0.000854701	0.000856839	0.000852792	0.000836048	0.000894386	0.000897033	0.000853549	0.000852089	0.000856797	uncharacterized protein
K06949	0	0	0	0	0	0	0	0	0	0	6.93031e-05	3.76115e-06	0	0.000587739	0.000417702	0	4.8663e-07	0	ribosome biogenesis GTPase / thiamine phosphate phosphatase [EC:3.6.1.- 3.1.3.100]
K06950	0.00105803	0.000967992	0.000888968	0.00111307	0.000955219	0.000873104	0.000873195	0.000876363	0.00088459	0.000854701	0.00088834	0.000867639	0.000997699	0.000306647	0.000479331	0.000864209	0.000874353	0.00087778	uncharacterized protein
K06953	0.000827957	0.000839839	0.0008503	0.000820719	0.00084148	0.00085228	0.000852347	0.000852023	0.000857732	0.000854701	0.000787536	0.000849031	0.000836048	0.000306647	0.000479331	0.000853549	0.000851603	0.000856797	uncharacterized protein
K06955	0	0	0	0	0	0	0	0	0	0	6.93031e-05	3.76115e-06	0	0.000587739	0.000417702	0	4.8663e-07	0	uncharacterized protein
K06961	0.000827957	0.000839839	0.0008503	0.000820719	0.00084148	0.00085228	0.000852347	0.000852023	0.000857732	0.000854701	0.000787536	0.000849031	0.000836048	0.000306647	0.000479331	0.000853549	0.000851603	0.000856797	ribosomal RNA assembly protein
K06963	0.000827957	0.000839839	0.0008503	0.000820719	0.00084148	0.00085228	0.000852347	0.000852023	0.000857732	0.000854701	0.000787536	0.000849031	0.000836048	0.000306647	0.000479331	0.000853549	0.000851603	0.000856797	tRNA acetyltransferase TAN1
K06965	0.000827957	0.000839839	0.0008503	0.000820719	0.00084148	0.00085228	0.000852347	0.000852023	0.000857732	0.000854701	0.000787536	0.000849031	0.000836048	0.000306647	0.000479331	0.000853549	0.000851603	0.000856797	protein pelota
K06966	0.000827957	0.000839839	0.0008503	0.000820719	0.00084148	0.00085228	0.000852347	0.000852023	0.000857732	0.000854701	0.000787536	0.000849031	0.000836048	0.000306647	0.000479331	0.000853549	0.000851603	0.000856797	uncharacterized protein
K06978	0	0	0	0	0	0	0	0	0	0	6.93031e-05	3.76115e-06	0	0.000587739	0.000417702	0	4.8663e-07	0	uncharacterized protein
K06981	0.000827957	0.000839839	0.0008503	0.000820719	0.00084148	0.00085228	0.000852347	0.000852023	0.000857732	0.000854701	0.000787536	0.000849031	0.000836048	0.000306647	0.000479331	0.000853549	0.000851603	0.000856797	isopentenyl phosphate kinase [EC:2.7.4.26]
K06982	0.000827957	0.000839839	0.0008503	0.000820719	0.00084148	0.00085228	0.000852347	0.000852023	0.000857732	0.000854701	0.000787536	0.000849031	0.000836048	0.000306647	0.000479331	0.000853549	0.000851603	0.000856797	pantoate kinase [EC:2.7.1.169]
K06987	0	0	0	0	0	0	0	0	0	0	6.93031e-05	3.76115e-06	0	0.000587739	0.000417702	0	4.8663e-07	0	uncharacterized protein
K06988	0.000827957	0.000839839	0.0008503	0.000820719	0.00084148	0.00085228	0.000852347	0.000852023	0.000857732	0.000854701	0.000787536	0.000849031	0.000836048	0.000306647	0.000479331	0.000853549	0.000851603	0.000856797	8-hydroxy-5-deazaflavin:NADPH oxidoreductase [EC:1.5.1.40]
K06989	0.000827957	0.000839839	0.0008503	0.000820719	0.00084148	0.00085228	0.000852347	0.000852023	0.000857732	0.000854701	0.000787536	0.000849031	0.000836048	0.000306647	0.000479331	0.000853549	0.000851603	0.000856797	aspartate dehydrogenase [EC:1.4.1.21]
K06990	0.000597885	0.000711399	0.000810857	0.000528372	0.000727741	0.000831457	0.000830927	0.000826435	0.000780175	0.000854701	0.000611128	0.000830423	0.000673263	0.000306647	0.000362922	0.00084217	0.000828853	0.000798449	MEMO1 family protein
K06991	0	0	0	0	0	0	0	0	0	0	6.93031e-05	3.76115e-06	0	0.000587739	0.000417702	0	4.8663e-07	0	uncharacterized protein
K06994	0	0	0	0	0	0	0	0	0	0	6.93031e-05	3.76115e-06	0	0.000587739	0.000417702	0	4.8663e-07	0	putative drug exporter of the RND superfamily
K06996	0.00142584	0.00155095	0.00166038	0.00134909	0.00156922	0.00168374	0.0016827	0.00167721	0.00158721	0.0017094	0.00132306	0.00167945	0.00150818	0.000613293	0.000725843	0.001695	0.00168046	0.00161788	uncharacterized protein
K07003	0	0	0	0	0	0	0	0	0	0	6.93031e-05	3.76115e-06	0	0.000587739	0.000417702	0	4.8663e-07	0	uncharacterized protein
K07005	0.000827957	0.000839839	0.0008503	0.000820719	0.00084148	0.00085228	0.000852347	0.000852023	0.000857732	0.000854701	0.000787536	0.000849031	0.000836048	0.000306647	0.000479331	0.000853549	0.000851603	0.000856797	uncharacterized protein
K07006	0.00165591	0.00167939	0.00169982	0.00164144	0.00168296	0.00170456	0.00170412	0.0017028	0.00166477	0.0017094	0.00149947	0.00169806	0.00167096	0.000613293	0.000842252	0.00170638	0.00170321	0.00167623	uncharacterized protein
K07010	0.000597885	0.000711399	0.000810857	0.000528372	0.000727741	0.000831457	0.000830927	0.000826435	0.000780175	0.000854701	0.000611128	0.000830423	0.000673263	0.000306647	0.000362922	0.00084217	0.000828853	0.000798449	putative glutamine amidotransferase
K07011	0.000827957	0.000839839	0.0008503	0.000820719	0.00084148	0.00085228	0.000852347	0.000852023	0.000857732	0.000854701	0.000787536	0.000849031	0.000836048	0.000306647	0.000479331	0.000853549	0.000851603	0.000856797	uncharacterized protein
K07023	0.000827957	0.000839839	0.0008503	0.000820719	0.00084148	0.00085228	0.000852347	0.000852023	0.000857732	0.000854701	0.000856839	0.000852792	0.000836048	0.000894386	0.000897033	0.000853549	0.000852089	0.000856797	putative hydrolases of HD superfamily
K07027	0.000827957	0.000840128	0.000851076	0.000820719	0.00084148	0.00085228	0.000852918	0.000853271	0.000908431	0.000854701	0.000863139	0.000849031	0.000837183	0.000306647	0.000595739	0.000854268	0.000851603	0.00089416	glycosyltransferase 2 family protein
K07031	0	2.88307e-07	7.75939e-07	0	0	0	5.71182e-07	1.2482e-06	5.06989e-05	0	0.000144907	3.76115e-06	1.13439e-06	0.000587739	0.000534111	7.18677e-07	4.8663e-07	3.73639e-05	D-glycero-alpha-D-manno-heptose-7-phosphate kinase [EC:2.7.1.168]
K07033	0	0	0	0	0	0	0	0	0	0	6.93031e-05	3.76115e-06	0	0.000587739	0.000417702	0	4.8663e-07	0	uncharacterized protein
K07041	0.00165591	0.00167968	0.0017006	0.00164144	0.00168296	0.00170456	0.00170469	0.00170405	0.00171546	0.0017094	0.00164437	0.00170182	0.0016721	0.00120103	0.00137636	0.0017071	0.00170369	0.00171359	uncharacterized protein
K07043	0.00142584	0.00155095	0.00166038	0.00134909	0.00156922	0.00168374	0.0016827	0.00167721	0.00158721	0.0017094	0.00132306	0.00167945	0.00150818	0.000613293	0.000725843	0.001695	0.00168046	0.00161788	uncharacterized protein
K07045	0.000230072	0.000128153	3.86676e-05	0.000292347	0.000113739	2.08236e-05	2.08482e-05	2.434e-05	2.68584e-05	0	0.000100805	1.86078e-05	0.000161651	0	0	1.06604e-05	2.275e-05	2.09833e-05	uncharacterized protein
K07049	0	0	0	0	0	0	0	0	0	0	6.93031e-05	3.76115e-06	0	0.000587739	0.000417702	0	4.8663e-07	0	TatD-related deoxyribonuclease
K07050	0	0	0	0	0	0	0	0	0	0	6.93031e-05	3.76115e-06	0	0.000587739	0.000417702	0	4.8663e-07	0	misacylated tRNA(Ala) deacylase [EC:3.1.1.-]
K07053	0	0	0	0	0	0	0	0	0	0	6.93031e-05	3.76115e-06	0	0.000587739	0.000417702	0	4.8663e-07	0	3,5-nucleoside bisphosphate phosphatase [EC:3.1.3.97]
K07059	0.00165591	0.0016791	0.00169905	0.00164144	0.00168296	0.00170456	0.00170355	0.00170155	0.00161407	0.0017094	0.00142386	0.00169806	0.00166983	0.000613293	0.000725843	0.00170566	0.00170321	0.00163887	uncharacterized protein
K07060	0.000827957	0.000839839	0.0008503	0.000820719	0.00084148	0.00085228	0.000852347	0.000852023	0.000857732	0.000854701	0.000856839	0.000852792	0.000836048	0.000894386	0.000897033	0.000853549	0.000852089	0.000856797	endoribonuclease Nob1 [EC:3.1.-.-]
K07068	0.00165591	0.00167968	0.0017006	0.00164144	0.00168296	0.00170456	0.00170469	0.00170405	0.00171546	0.0017094	0.00157507	0.00169806	0.0016721	0.000613293	0.000958661	0.0017071	0.00170321	0.00171359	uncharacterized protein
K07071	0.00105803	0.000967992	0.000888968	0.00111307	0.000955219	0.000873104	0.000873195	0.000876363	0.00088459	0.000854701	0.000957643	0.0008714	0.000997699	0.000894386	0.000897033	0.000864209	0.000874839	0.00087778	uncharacterized protein
K07086	0.000827957	0.000839839	0.0008503	0.000820719	0.00084148	0.00085228	0.000852347	0.000852023	0.000857732	0.000854701	0.000787536	0.000849031	0.000836048	0.000306647	0.000479331	0.000853549	0.000851603	0.000856797	uncharacterized protein
K07090	0.000827957	0.000839839	0.0008503	0.000820719	0.00084148	0.00085228	0.000852347	0.000852023	0.000857732	0.000854701	0.000856839	0.000852792	0.000836048	0.000894386	0.000897033	0.000853549	0.000852089	0.000856797	uncharacterized protein
K07093	0	0	0	0	0	0	0	0	0	0	6.93031e-05	3.76115e-06	0	0.000587739	0.000417702	0	4.8663e-07	0	uncharacterized protein
K07095	0	2.88307e-07	7.75939e-07	0	0	0	5.71182e-07	1.2482e-06	5.06989e-05	0	7.56034e-05	0	1.13439e-06	0	0.000116409	7.18677e-07	0	3.73639e-05	uncharacterized protein
K07101	0.000597885	0.000711399	0.000810857	0.000528372	0.000727741	0.000831457	0.000830927	0.000826435	0.000780175	0.000854701	0.000611128	0.000830423	0.000673263	0.000306647	0.000362922	0.00084217	0.000828853	0.000798449	uncharacterized protein
K07108	0.000827957	0.000839839	0.0008503	0.000820719	0.00084148	0.00085228	0.000852347	0.000852023	0.000857732	0.000854701	0.000787536	0.000849031	0.000836048	0.000306647	0.000479331	0.000853549	0.000851603	0.000856797	uncharacterized protein
K07114	0.000597885	0.000711687	0.000811633	0.000528372	0.000727741	0.000831457	0.000831499	0.000827683	0.000830874	0.000854701	0.000686731	0.000830423	0.000674397	0.000306647	0.000479331	0.000842889	0.000828853	0.000835813	Ca-activated chloride channel homolog
K07124	0.00188599	0.00180783	0.00173927	0.00193378	0.0017967	0.00172538	0.00172554	0.00172839	0.00174232	0.0017094	0.00167588	0.00171667	0.00183375	0.000613293	0.000958661	0.00171776	0.00172596	0.00173458	uncharacterized protein
K07126	0.000230072	0.000128153	3.86676e-05	0.000292347	0.000113739	2.08236e-05	2.08482e-05	2.434e-05	2.68584e-05	0	0.000100805	1.86078e-05	0.000161651	0	0	1.06604e-05	2.275e-05	2.09833e-05	uncharacterized protein
K07128	0	0	0	0	0	0	0	0	0	0	6.93031e-05	3.76115e-06	0	0.000587739	0.000417702	0	4.8663e-07	0	uncharacterized protein
K07129	0	0	0	0	0	0	0	0	0	0	6.93031e-05	3.76115e-06	0	0.000587739	0.000417702	0	4.8663e-07	0	uncharacterized protein
K07130	0.00142584	0.00155124	0.00166116	0.00134909	0.00156922	0.00168374	0.00168327	0.00167846	0.00163791	0.0017094	0.00139866	0.00167945	0.00150931	0.000613293	0.000842252	0.00169572	0.00168046	0.00165525	arylformamidase [EC:3.5.1.9]
K07133	0	2.88307e-07	7.75939e-07	0	0	0	5.71182e-07	1.2482e-06	5.06989e-05	0	7.56034e-05	0	1.13439e-06	0	0.000116409	7.18677e-07	0	3.73639e-05	uncharacterized protein
K07142	0.000827957	0.000839839	0.0008503	0.000820719	0.00084148	0.00085228	0.000852347	0.000852023	0.000857732	0.000854701	0.000787536	0.000849031	0.000836048	0.000306647	0.000479331	0.000853549	0.000851603	0.000856797	2-amino-4-hydroxy-6-hydroxymethyldihydropteridine diphosphokinase [EC:2.7.6.3]
K07143	0.000827957	0.000839839	0.0008503	0.000820719	0.00084148	0.00085228	0.000852347	0.000852023	0.000857732	0.000854701	0.000787536	0.000849031	0.000836048	0.000306647	0.000479331	0.000853549	0.000851603	0.000856797	UPF0148 protein
K07146	0	0	0	0	0	0	0	0	0	0	6.93031e-05	3.76115e-06	0	0.000587739	0.000417702	0	4.8663e-07	0	UPF0176 protein
K07151	0.000827957	0.000839839	0.0008503	0.000820719	0.00084148	0.00085228	0.000852347	0.000852023	0.000857732	0.000854701	0.000856839	0.000852792	0.000836048	0.000894386	0.000897033	0.000853549	0.000852089	0.000856797	dolichyl-diphosphooligosaccharide---protein glycosyltransferase [EC:2.4.99.18]
K07152	0	0	0	0	0	0	0	0	0	0	6.93031e-05	3.76115e-06	0	0.000587739	0.000417702	0	4.8663e-07	0	protein SCO1/2
K07157	0.000827957	0.000839839	0.0008503	0.000820719	0.00084148	0.00085228	0.000852347	0.000852023	0.000857732	0.000854701	0.000856839	0.000852792	0.000836048	0.000894386	0.000897033	0.000853549	0.000852089	0.000856797	uncharacterized protein
K07158	0.000827957	0.000839839	0.0008503	0.000820719	0.00084148	0.00085228	0.000852347	0.000852023	0.000857732	0.000854701	0.000787536	0.000849031	0.000836048	0.000306647	0.000479331	0.000853549	0.000851603	0.000856797	uncharacterized protein
K07159	0.00105803	0.000967992	0.000888968	0.00111307	0.000955219	0.000873104	0.000873195	0.000876363	0.00088459	0.000854701	0.00088834	0.000867639	0.000997699	0.000306647	0.000479331	0.000864209	0.000874353	0.00087778	uncharacterized protein
K07168	0.000597885	0.000711687	0.000811633	0.000528372	0.000727741	0.000831457	0.000831499	0.000827683	0.000830874	0.000854701	0.000686731	0.000830423	0.000674397	0.000306647	0.000479331	0.000842889	0.000828853	0.000835813	CBS domain-containing membrane protein
K07176	0.000827957	0.000839839	0.0008503	0.000820719	0.00084148	0.00085228	0.000852347	0.000852023	0.000857732	0.000854701	0.000787536	0.000849031	0.000836048	0.000306647	0.000479331	0.000853549	0.000851603	0.000856797	putative serine/threonine protein kinase
K07178	0.000827957	0.000839839	0.0008503	0.000820719	0.00084148	0.00085228	0.000852347	0.000852023	0.000857732	0.000854701	0.000856839	0.000852792	0.000836048	0.000894386	0.000897033	0.000853549	0.000852089	0.000856797	RIO kinase 1 [EC:2.7.11.1]
K07182	0.00165591	0.0016791	0.00169905	0.00164144	0.00168296	0.00170456	0.00170355	0.00170155	0.00161407	0.0017094	0.00142386	0.00169806	0.00166983	0.000613293	0.000725843	0.00170566	0.00170321	0.00163887	CBS domain-containing protein
K07183	0.000230072	0.000128153	3.86676e-05	0.000292347	0.000113739	2.08236e-05	2.08482e-05	2.434e-05	2.68584e-05	0	0.000100805	1.86078e-05	0.000161651	0	0	1.06604e-05	2.275e-05	2.09833e-05	two-component system, response regulator / RNA-binding antiterminator
K07192	0	0	0	0	0	0	0	0	0	0	6.93031e-05	3.76115e-06	0	0.000587739	0.000417702	0	4.8663e-07	0	flotillin
K07213	0	0	0	0	0	0	0	0	0	0	6.93031e-05	3.76115e-06	0	0.000587739	0.000417702	0	4.8663e-07	0	copper chaperone
K07220	0.000827957	0.000840128	0.000851076	0.000820719	0.00084148	0.00085228	0.000852918	0.000853271	0.000908431	0.000854701	0.000863139	0.000849031	0.000837183	0.000306647	0.000595739	0.000854268	0.000851603	0.00089416	uncharacterized protein
K07238	0.00142584	0.00155124	0.00166116	0.00134909	0.00156922	0.00168374	0.00168327	0.00167846	0.00163791	0.0017094	0.00139866	0.00167945	0.00150931	0.000613293	0.000842252	0.00169572	0.00168046	0.00165525	zinc transporter, ZIP family
K07243	0	5.76615e-07	1.55188e-06	0	0	0	1.14236e-06	2.49641e-06	0.000101398	0	0.000151207	0	2.26879e-06	0	0.000232818	1.43735e-06	0	7.47277e-05	high-affinity iron transporter
K07248	0.000597885	0.000711399	0.000810857	0.000528372	0.000727741	0.000831457	0.000830927	0.000826435	0.000780175	0.000854701	0.000611128	0.000830423	0.000673263	0.000306647	0.000362922	0.00084217	0.000828853	0.000798449	lactaldehyde dehydrogenase / glycolaldehyde dehydrogenase [EC:1.2.1.22 1.2.1.21]
K07254	0.000827957	0.000839839	0.0008503	0.000820719	0.00084148	0.00085228	0.000852347	0.000852023	0.000857732	0.000854701	0.000856839	0.000852792	0.000836048	0.000894386	0.000897033	0.000853549	0.000852089	0.000856797	tRNA (cytidine56-2-O)-methyltransferase [EC:2.1.1.206]
K07257	0.00142584	0.00155124	0.00166116	0.00134909	0.00156922	0.00168374	0.00168327	0.00167846	0.00163791	0.0017094	0.00139866	0.00167945	0.00150931	0.000613293	0.000842252	0.00169572	0.00168046	0.00165525	spore coat polysaccharide biosynthesis protein SpsF
K07300	0	0	0	0	0	0	0	0	0	0	6.93031e-05	3.76115e-06	0	0.000587739	0.000417702	0	4.8663e-07	0	Ca2+:H+ antiporter
K07301	0.00105803	0.000967992	0.000888968	0.00111307	0.000955219	0.000873104	0.000873195	0.000876363	0.00088459	0.000854701	0.000957643	0.0008714	0.000997699	0.000894386	0.000897033	0.000864209	0.000874839	0.00087778	cation:H+ antiporter
K07304	0.000827957	0.000839839	0.0008503	0.000820719	0.00084148	0.00085228	0.000852347	0.000852023	0.000857732	0.000854701	0.000856839	0.000852792	0.000836048	0.000894386	0.000897033	0.000853549	0.000852089	0.000856797	peptide-methionine (S)-S-oxide reductase [EC:1.8.4.11]
K07305	0.000827957	0.000839839	0.0008503	0.000820719	0.00084148	0.00085228	0.000852347	0.000852023	0.000857732	0.000854701	0.000856839	0.000852792	0.000836048	0.000894386	0.000897033	0.000853549	0.000852089	0.000856797	peptide-methionine (R)-S-oxide reductase [EC:1.8.4.12]
K07313	0	0	0	0	0	0	0	0	0	0	0.000138606	7.52231e-06	0	0.00117548	0.000835405	0	9.7326e-07	0	serine/threonine protein phosphatase 1 [EC:3.1.3.16]
K07316	0.000230072	0.000128153	3.86676e-05	0.000292347	0.000113739	2.08236e-05	2.08482e-05	2.434e-05	2.68584e-05	0	0.000100805	1.86078e-05	0.000161651	0	0	1.06604e-05	2.275e-05	2.09833e-05	adenine-specific DNA-methyltransferase [EC:2.1.1.72]
K07325	0.00115036	0.000640763	0.000193338	0.00146173	0.000568694	0.000104118	0.000104241	0.0001217	0.000134292	0	0.000504023	9.3039e-05	0.000808256	0	0	5.33019e-05	0.00011375	0.000104917	archaeal flagellin FlaB
K07330	0.000230072	0.000128153	3.86676e-05	0.000292347	0.000113739	2.08236e-05	2.08482e-05	2.434e-05	2.68584e-05	0	0.000100805	1.86078e-05	0.000161651	0	0	1.06604e-05	2.275e-05	2.09833e-05	archaeal flagellar protein FlaG
K07331	0.000230072	0.000128153	3.86676e-05	0.000292347	0.000113739	2.08236e-05	2.08482e-05	2.434e-05	2.68584e-05	0	0.000100805	1.86078e-05	0.000161651	0	0	1.06604e-05	2.275e-05	2.09833e-05	archaeal flagellar protein FlaH
K07332	0.000920289	0.000512611	0.000154671	0.00116939	0.000454955	8.32944e-05	8.33926e-05	9.73598e-05	0.000107433	0	0.000611128	8.57147e-05	0.000646605	0.00176322	0.00125311	4.26415e-05	9.24597e-05	8.39333e-05	archaeal flagellar protein FlaI
K07333	0.000690217	0.000384458	0.000116003	0.00087704	0.000341216	6.24708e-05	6.25445e-05	7.30199e-05	8.05751e-05	0	0.000371717	5.95846e-05	0.000484953	0.000587739	0.000417702	3.19811e-05	6.87365e-05	6.295e-05	archaeal flagellar protein FlaJ
K07342	0.000827957	0.000839551	0.000849524	0.000820719	0.00084148	0.00085228	0.000851776	0.000850775	0.000807033	0.000854701	0.000711932	0.000849031	0.000834914	0.000306647	0.000362922	0.00085283	0.000851603	0.000819433	protein transport protein SEC61 subunit gamma and related proteins
K07390	0	0	0	0	0	0	0	0	0	0	6.93031e-05	3.76115e-06	0	0.000587739	0.000417702	0	4.8663e-07	0	monothiol glutaredoxin
K07391	0	0	0	0	0	0	0	0	0	0	6.93031e-05	3.76115e-06	0	0.000587739	0.000417702	0	4.8663e-07	0	magnesium chelatase family protein
K07393	0	0	0	0	0	0	0	0	0	0	6.93031e-05	3.76115e-06	0	0.000587739	0.000417702	0	4.8663e-07	0	glutathionyl-hydroquinone reductase [EC:1.8.5.7]
K07397	0	0	0	0	0	0	0	0	0	0	6.93031e-05	3.76115e-06	0	0.000587739	0.000417702	0	4.8663e-07	0	putative redox protein
K07398	0.000827957	0.000839839	0.0008503	0.000820719	0.00084148	0.00085228	0.000852347	0.000852023	0.000857732	0.000854701	0.000787536	0.000849031	0.000836048	0.000306647	0.000479331	0.000853549	0.000851603	0.000856797	conserved protein with predicted RNA binding PUA domain
K07442	0.000827957	0.000839839	0.0008503	0.000820719	0.00084148	0.00085228	0.000852347	0.000852023	0.000857732	0.000854701	0.000787536	0.000849031	0.000836048	0.000306647	0.000479331	0.000853549	0.000851603	0.000856797	tRNA (adenine57-N1/adenine58-N1)-methyltransferase catalytic subunit [EC:2.1.1.219 2.1.1.220]
K07446	0.000827957	0.000839551	0.000849524	0.000820719	0.00084148	0.00085228	0.000851776	0.000850775	0.000807033	0.000854701	0.000781235	0.000852792	0.000834914	0.000894386	0.000780624	0.00085283	0.000852089	0.000819433	tRNA (guanine10-N2)-dimethyltransferase [EC:2.1.1.213]
K07448	0.000230072	0.000128153	3.86676e-05	0.000292347	0.000113739	2.08236e-05	2.08482e-05	2.434e-05	2.68584e-05	0	0.000100805	1.86078e-05	0.000161651	0	0	1.06604e-05	2.275e-05	2.09833e-05	restriction system protein
K07451	0.000230072	0.000128153	3.86676e-05	0.000292347	0.000113739	2.08236e-05	2.08482e-05	2.434e-05	2.68584e-05	0	0.000100805	1.86078e-05	0.000161651	0	0	1.06604e-05	2.275e-05	2.09833e-05	5-methylcytosine-specific restriction enzyme A [EC:3.1.21.-]
K07463	0.00165591	0.00167968	0.0017006	0.00164144	0.00168296	0.00170456	0.00170469	0.00170405	0.00171546	0.0017094	0.00157507	0.00169806	0.0016721	0.000613293	0.000958661	0.0017071	0.00170321	0.00171359	archaea-specific RecJ-like exonuclease
K07464	0.000827957	0.000839839	0.0008503	0.000820719	0.00084148	0.00085228	0.000852347	0.000852023	0.000857732	0.000854701	0.000787536	0.000849031	0.000836048	0.000306647	0.000479331	0.000853549	0.000851603	0.000856797	CRISPR-associated exonuclease Cas4 [EC:3.1.12.1]
K07466	0.00165591	0.00167968	0.0017006	0.00164144	0.00168296	0.00170456	0.00170469	0.00170405	0.00171546	0.0017094	0.00157507	0.00169806	0.0016721	0.000613293	0.000958661	0.0017071	0.00170321	0.00171359	replication factor A1
K07477	0.000827957	0.000839839	0.0008503	0.000820719	0.00084148	0.00085228	0.000852347	0.000852023	0.000857732	0.000854701	0.000787536	0.000849031	0.000836048	0.000306647	0.000479331	0.000853549	0.000851603	0.000856797	translin
K07508	0	0	0	0	0	0	0	0	0	0	6.93031e-05	3.76115e-06	0	0.000587739	0.000417702	0	4.8663e-07	0	acetyl-CoA acyltransferase 2 [EC:2.3.1.16]
K07516	0	0	0	0	0	0	0	0	0	0	0.000138606	7.52231e-06	0	0.00117548	0.000835405	0	9.7326e-07	0	3-hydroxyacyl-CoA dehydrogenase [EC:1.1.1.35]
K07533	0.000827957	0.000839839	0.0008503	0.000820719	0.00084148	0.00085228	0.000852347	0.000852023	0.000857732	0.000854701	0.000787536	0.000849031	0.000836048	0.000306647	0.000479331	0.000853549	0.000851603	0.000856797	foldase protein PrsA [EC:5.2.1.8]
K07557	0	0	0	0	0	0	0	0	0	0	6.93031e-05	3.76115e-06	0	0.000587739	0.000417702	0	4.8663e-07	0	archaeosine synthase [EC:2.6.1.97]
K07558	0.000827957	0.000839839	0.0008503	0.000820719	0.00084148	0.00085228	0.000852347	0.000852023	0.000857732	0.000854701	0.000787536	0.000849031	0.000836048	0.000306647	0.000479331	0.000853549	0.000851603	0.000856797	tRNA nucleotidyltransferase (CCA-adding enzyme) [EC:2.7.7.72]
K07559	0	0	0	0	0	0	0	0	0	0	6.93031e-05	3.76115e-06	0	0.000587739	0.000417702	0	4.8663e-07	0	putative RNA 2-phosphotransferase [EC:2.7.1.-]
K07561	0.000827957	0.000839839	0.0008503	0.000820719	0.00084148	0.00085228	0.000852347	0.000852023	0.000857732	0.000854701	0.000856839	0.000852792	0.000836048	0.000894386	0.000897033	0.000853549	0.000852089	0.000856797	2-(3-amino-3-carboxypropyl)histidine synthase [EC:2.5.1.108]
K07566	0.000827957	0.000839839	0.0008503	0.000820719	0.00084148	0.00085228	0.000852347	0.000852023	0.000857732	0.000854701	0.000856839	0.000852792	0.000836048	0.000894386	0.000897033	0.000853549	0.000852089	0.000856797	L-threonylcarbamoyladenylate synthase [EC:2.7.7.87]
K07569	0.000827957	0.000839839	0.0008503	0.000820719	0.00084148	0.00085228	0.000852347	0.000852023	0.000857732	0.000854701	0.000787536	0.000849031	0.000836048	0.000306647	0.000479331	0.000853549	0.000851603	0.000856797	RNA-binding protein
K07572	0.000827957	0.000839839	0.0008503	0.000820719	0.00084148	0.00085228	0.000852347	0.000852023	0.000857732	0.000854701	0.000787536	0.000849031	0.000836048	0.000306647	0.000479331	0.000853549	0.000851603	0.000856797	putative nucleotide binding protein
K07573	0.000827957	0.000839839	0.0008503	0.000820719	0.00084148	0.00085228	0.000852347	0.000852023	0.000857732	0.000854701	0.000787536	0.000849031	0.000836048	0.000306647	0.000479331	0.000853549	0.000851603	0.000856797	exosome complex component CSL4
K07575	0.000827957	0.000839839	0.0008503	0.000820719	0.00084148	0.00085228	0.000852347	0.000852023	0.000857732	0.000854701	0.000787536	0.000849031	0.000836048	0.000306647	0.000479331	0.000853549	0.000851603	0.000856797	PUA domain protein
K07576	0	0	0	0	0	0	0	0	0	0	0.000138606	7.52231e-06	0	0.00117548	0.000835405	0	9.7326e-07	0	metallo-beta-lactamase family protein
K07577	0.00165591	0.00167968	0.0017006	0.00164144	0.00168296	0.00170456	0.00170469	0.00170405	0.00171546	0.0017094	0.00171368	0.00170558	0.0016721	0.00178877	0.00179407	0.0017071	0.00170418	0.00171359	putative mRNA 3-end processing factor
K07579	0	0	0	0	0	0	0	0	0	0	6.93031e-05	3.76115e-06	0	0.000587739	0.000417702	0	4.8663e-07	0	putative methylase
K07580	0	2.88307e-07	7.75939e-07	0	0	0	5.71182e-07	1.2482e-06	5.06989e-05	0	7.56034e-05	0	1.13439e-06	0	0.000116409	7.18677e-07	0	3.73639e-05	Zn-ribbon RNA-binding protein
K07581	0.000827957	0.000839839	0.0008503	0.000820719	0.00084148	0.00085228	0.000852347	0.000852023	0.000857732	0.000854701	0.000787536	0.000849031	0.000836048	0.000306647	0.000479331	0.000853549	0.000851603	0.000856797	RNA-binding protein
K07583	0.000827957	0.000839839	0.0008503	0.000820719	0.00084148	0.00085228	0.000852347	0.000852023	0.000857732	0.000854701	0.000856839	0.000852792	0.000836048	0.000894386	0.000897033	0.000853549	0.000852089	0.000856797	tRNA pseudouridine synthase 10 [EC:5.4.99.25]
K07588	0.000827957	0.000839839	0.0008503	0.000820719	0.00084148	0.00085228	0.000852347	0.000852023	0.000857732	0.000854701	0.000856839	0.000852792	0.000836048	0.000894386	0.000897033	0.000853549	0.000852089	0.000856797	LAO/AO transport system kinase [EC:2.7.-.-]
K07636	0.0012881	0.00109586	0.00092686	0.00140541	0.00106896	0.000893928	0.000893472	0.000899455	0.00086075	0.000854701	0.000913541	0.000886246	0.00115822	0.000306647	0.000362922	0.000874151	0.000897103	0.000861399	two-component system, OmpR family, phosphate regulon sensor histidine kinase PhoR [EC:2.7.13.3]
K07642	0.000230072	0.000128153	3.86676e-05	0.000292347	0.000113739	2.08236e-05	2.08482e-05	2.434e-05	2.68584e-05	0	0.000100805	1.86078e-05	0.000161651	0	0	1.06604e-05	2.275e-05	2.09833e-05	two-component system, OmpR family, sensor histidine kinase BaeS [EC:2.7.13.3]
K07645	0.000597885	0.000711399	0.000810857	0.000528372	0.000727741	0.000831457	0.000830927	0.000826435	0.000780175	0.000854701	0.000611128	0.000830423	0.000673263	0.000306647	0.000362922	0.00084217	0.000828853	0.000798449	two-component system, OmpR family, sensor histidine kinase QseC [EC:2.7.13.3]
K07646	0.000597885	0.000711399	0.000810857	0.000528372	0.000727741	0.000831457	0.000830927	0.000826435	0.000780175	0.000854701	0.000611128	0.000830423	0.000673263	0.000306647	0.000362922	0.00084217	0.000828853	0.000798449	two-component system, OmpR family, sensor histidine kinase KdpD [EC:2.7.13.3]
K07670	0.000230072	0.000128153	3.86676e-05	0.000292347	0.000113739	2.08236e-05	2.08482e-05	2.434e-05	2.68584e-05	0	0.000100805	1.86078e-05	0.000161651	0	0	1.06604e-05	2.275e-05	2.09833e-05	two-component system, OmpR family, response regulator MtrA
K07677	0.000230072	0.000128153	3.86676e-05	0.000292347	0.000113739	2.08236e-05	2.08482e-05	2.434e-05	2.68584e-05	0	0.000100805	1.86078e-05	0.000161651	0	0	1.06604e-05	2.275e-05	2.09833e-05	two-component system, NarL family, capsular synthesis sensor histidine kinase RcsC [EC:2.7.13.3]
K07678	0.000230072	0.000128153	3.86676e-05	0.000292347	0.000113739	2.08236e-05	2.08482e-05	2.434e-05	2.68584e-05	0	0.000100805	1.86078e-05	0.000161651	0	0	1.06604e-05	2.275e-05	2.09833e-05	two-component system, NarL family, sensor histidine kinase BarA [EC:2.7.13.3]
K07679	0.000230072	0.000128153	3.86676e-05	0.000292347	0.000113739	2.08236e-05	2.08482e-05	2.434e-05	2.68584e-05	0	0.000100805	1.86078e-05	0.000161651	0	0	1.06604e-05	2.275e-05	2.09833e-05	two-component system, NarL family, sensor histidine kinase EvgS [EC:2.7.13.3]
K07684	0.000230072	0.000128153	3.86676e-05	0.000292347	0.000113739	2.08236e-05	2.08482e-05	2.434e-05	2.68584e-05	0	0.000100805	1.86078e-05	0.000161651	0	0	1.06604e-05	2.275e-05	2.09833e-05	two-component system, NarL family, nitrate/nitrite response regulator NarL
K07689	0.000230072	0.000128153	3.86676e-05	0.000292347	0.000113739	2.08236e-05	2.08482e-05	2.434e-05	2.68584e-05	0	0.000100805	1.86078e-05	0.000161651	0	0	1.06604e-05	2.275e-05	2.09833e-05	two-component system, NarL family, invasion response regulator UvrY
K07698	0.000230072	0.000128153	3.86676e-05	0.000292347	0.000113739	2.08236e-05	2.08482e-05	2.434e-05	2.68584e-05	0	0.000100805	1.86078e-05	0.000161651	0	0	1.06604e-05	2.275e-05	2.09833e-05	two-component system, sporulation sensor kinase C [EC:2.7.13.3]
K07699	0.000230072	0.000128153	3.86676e-05	0.000292347	0.000113739	2.08236e-05	2.08482e-05	2.434e-05	2.68584e-05	0	0.000100805	1.86078e-05	0.000161651	0	0	1.06604e-05	2.275e-05	2.09833e-05	two-component system, response regulator, stage 0 sporulation protein A
K07705	0.000230072	0.000128153	3.86676e-05	0.000292347	0.000113739	2.08236e-05	2.08482e-05	2.434e-05	2.68584e-05	0	0.000100805	1.86078e-05	0.000161651	0	0	1.06604e-05	2.275e-05	2.09833e-05	two-component system, LytTR family, response regulator LytT
K07709	0.00680832	0.00606253	0.00540649	0.00726309	0.00595879	0.00528027	0.00527744	0.00529937	0.00505707	0.00512821	0.00507803	0.00524305	0.00630269	0.00183988	0.00217753	0.00520226	0.00529162	0.00508446	two-component system, NtrC family, sensor histidine kinase HydH [EC:2.7.13.3]
K07710	0.000690217	0.000384458	0.000116003	0.00087704	0.000341216	6.24708e-05	6.25445e-05	7.30199e-05	8.05751e-05	0	0.000302414	5.58234e-05	0.000484953	0	0	3.19811e-05	6.82499e-05	6.295e-05	two-component system, NtrC family, sensor histidine kinase AtoS [EC:2.7.13.3]
K07711	0.000230072	0.000128153	3.86676e-05	0.000292347	0.000113739	2.08236e-05	2.08482e-05	2.434e-05	2.68584e-05	0	0.000100805	1.86078e-05	0.000161651	0	0	1.06604e-05	2.275e-05	2.09833e-05	two-component system, NtrC family, sensor histidine kinase GlrK [EC:2.7.13.3]
K07720	0.000597885	0.000711399	0.000810857	0.000528372	0.000727741	0.000831457	0.000830927	0.000826435	0.000780175	0.000854701	0.000611128	0.000830423	0.000673263	0.000306647	0.000362922	0.00084217	0.000828853	0.000798449	two-component system, response regulator YesN
K07722	0.000827957	0.000839839	0.0008503	0.000820719	0.00084148	0.00085228	0.000852347	0.000852023	0.000857732	0.000854701	0.000787536	0.000849031	0.000836048	0.000306647	0.000479331	0.000853549	0.000851603	0.000856797	CopG family transcriptional regulator, nickel-responsive regulator
K07732	0.000827957	0.000839839	0.0008503	0.000820719	0.00084148	0.00085228	0.000852347	0.000852023	0.000857732	0.000854701	0.000787536	0.000849031	0.000836048	0.000306647	0.000479331	0.000853549	0.000851603	0.000856797	riboflavin kinase, archaea type [EC:2.7.1.161]
K07739	0.000827957	0.000839839	0.0008503	0.000820719	0.00084148	0.00085228	0.000852347	0.000852023	0.000857732	0.000854701	0.000787536	0.000849031	0.000836048	0.000306647	0.000479331	0.000853549	0.000851603	0.000856797	elongator complex protein 3 [EC:2.3.1.48]
K07749	0	0	0	0	0	0	0	0	0	0	6.93031e-05	3.76115e-06	0	0.000587739	0.000417702	0	4.8663e-07	0	formyl-CoA transferase [EC:2.8.3.16]
K07774	0.000230072	0.000128153	3.86676e-05	0.000292347	0.000113739	2.08236e-05	2.08482e-05	2.434e-05	2.68584e-05	0	0.000100805	1.86078e-05	0.000161651	0	0	1.06604e-05	2.275e-05	2.09833e-05	two-component system, OmpR family, response regulator TctD
K07806	0.000827957	0.000840128	0.000851076	0.000820719	0.00084148	0.00085228	0.000852918	0.000853271	0.000908431	0.000854701	0.000863139	0.000849031	0.000837183	0.000306647	0.000595739	0.000854268	0.000851603	0.00089416	UDP-4-amino-4-deoxy-L-arabinose-oxoglutarate aminotransferase [EC:2.6.1.87]
K07991	0.000230072	0.000128153	3.86676e-05	0.000292347	0.000113739	2.08236e-05	2.08482e-05	2.434e-05	2.68584e-05	0	0.000100805	1.86078e-05	0.000161651	0	0	1.06604e-05	2.275e-05	2.09833e-05	archaeal preflagellin peptidase FlaK [EC:3.4.23.52]
K08068	0.000230072	0.000128153	3.86676e-05	0.000292347	0.000113739	2.08236e-05	2.08482e-05	2.434e-05	2.68584e-05	0	0.000100805	1.86078e-05	0.000161651	0	0	1.06604e-05	2.275e-05	2.09833e-05	UDP-N-acetylglucosamine 2-epimerase (hydrolysing) [EC:3.2.1.183]
K08096	0.000827957	0.000839839	0.0008503	0.000820719	0.00084148	0.00085228	0.000852347	0.000852023	0.000857732	0.000854701	0.000787536	0.000849031	0.000836048	0.000306647	0.000479331	0.000853549	0.000851603	0.000856797	GTP cyclohydrolase IIa [EC:3.5.4.29]
K08151	0	0	0	0	0	0	0	0	0	0	6.93031e-05	3.76115e-06	0	0.000587739	0.000417702	0	4.8663e-07	0	MFS transporter, DHA1 family, tetracycline resistance protein
K08153	0.00165591	0.00167968	0.0017006	0.00164144	0.00168296	0.00170456	0.00170469	0.00170405	0.00171546	0.0017094	0.00157507	0.00169806	0.0016721	0.000613293	0.000958661	0.0017071	0.00170321	0.00171359	MFS transporter, DHA1 family, multidrug resistance protein
K08167	0	0	0	0	0	0	0	0	0	0	6.93031e-05	3.76115e-06	0	0.000587739	0.000417702	0	4.8663e-07	0	MFS transporter, DHA2 family, multidrug resistance protein
K08177	0	0	0	0	0	0	0	0	0	0	6.93031e-05	3.76115e-06	0	0.000587739	0.000417702	0	4.8663e-07	0	MFS transporter, OFA family, oxalate/formate antiporter
K08218	0	0	0	0	0	0	0	0	0	0	6.93031e-05	3.76115e-06	0	0.000587739	0.000417702	0	4.8663e-07	0	MFS transporter, PAT family, beta-lactamase induction signal transducer AmpG
K08282	0.000827957	0.000839839	0.0008503	0.000820719	0.00084148	0.00085228	0.000852347	0.000852023	0.000857732	0.000854701	0.000787536	0.000849031	0.000836048	0.000306647	0.000479331	0.000853549	0.000851603	0.000856797	non-specific serine/threonine protein kinase [EC:2.7.11.1]
K08300	0.00202373	0.00226235	0.00247124	0.00187746	0.00229696	0.00251519	0.00251363	0.00250364	0.00236738	0.0025641	0.00193419	0.00250988	0.00218144	0.00091994	0.00108877	0.00253717	0.00250931	0.00241633	ribonuclease E [EC:3.1.26.12]
K08311	0	0	0	0	0	0	0	0	0	0	6.93031e-05	3.76115e-06	0	0.000587739	0.000417702	0	4.8663e-07	0	putative (di)nucleoside polyphosphate hydrolase [EC:3.6.1.-]
K08321	0.000827957	0.000839839	0.0008503	0.000820719	0.00084148	0.00085228	0.000852347	0.000852023	0.000857732	0.000854701	0.000787536	0.000849031	0.000836048	0.000306647	0.000479331	0.000853549	0.000851603	0.000856797	3-hydroxy-5-phosphonooxypentane-2,4-dione thiolase [EC:2.3.1.245]
K08324	0.000827957	0.000839551	0.000849524	0.000820719	0.00084148	0.00085228	0.000851776	0.000850775	0.000807033	0.000854701	0.000711932	0.000849031	0.000834914	0.000306647	0.000362922	0.00085283	0.000851603	0.000819433	succinate-semialdehyde dehydrogenase [EC:1.2.1.16 1.2.1.24]
K08372	0.00142584	0.00155095	0.00166038	0.00134909	0.00156922	0.00168374	0.0016827	0.00167721	0.00158721	0.0017094	0.00132306	0.00167945	0.00150818	0.000613293	0.000725843	0.001695	0.00168046	0.00161788	putative serine protease PepD [EC:3.4.21.-]
K08482	0.000230072	0.000128153	3.86676e-05	0.000292347	0.000113739	2.08236e-05	2.08482e-05	2.434e-05	2.68584e-05	0	0.000170108	2.2369e-05	0.000161651	0.000587739	0.000417702	1.06604e-05	2.32366e-05	2.09833e-05	circadian clock protein KaiC
K08602	0.000827957	0.000839839	0.0008503	0.000820719	0.00084148	0.00085228	0.000852347	0.000852023	0.000857732	0.000854701	0.000787536	0.000849031	0.000836048	0.000306647	0.000479331	0.000853549	0.000851603	0.000856797	oligoendopeptidase F [EC:3.4.24.-]
K08604	0	0	0	0	0	0	0	0	0	0	6.93031e-05	3.76115e-06	0	0.000587739	0.000417702	0	4.8663e-07	0	vibriolysin [EC:3.4.24.25]
K08651	0	2.88307e-07	7.75939e-07	0	0	0	5.71182e-07	1.2482e-06	5.06989e-05	0	7.56034e-05	0	1.13439e-06	0	0.000116409	7.18677e-07	0	3.73639e-05	thermitase [EC:3.4.21.66]
K08678	0	2.88307e-07	7.75939e-07	0	0	0	5.71182e-07	1.2482e-06	5.06989e-05	0	0.00021421	7.52231e-06	1.13439e-06	0.00117548	0.000951814	7.18677e-07	9.7326e-07	3.73639e-05	UDP-glucuronate decarboxylase [EC:4.1.1.35]
K08679	0	2.88307e-07	7.75939e-07	0	0	0	5.71182e-07	1.2482e-06	5.06989e-05	0	0.000144907	3.76115e-06	1.13439e-06	0.000587739	0.000534111	7.18677e-07	4.8663e-07	3.73639e-05	UDP-glucuronate 4-epimerase [EC:5.1.3.6]
K08681	0.000827957	0.000839839	0.0008503	0.000820719	0.00084148	0.00085228	0.000852347	0.000852023	0.000857732	0.000854701	0.000856839	0.000852792	0.000836048	0.000894386	0.000897033	0.000853549	0.000852089	0.000856797	5-phosphate synthase pdxT subunit [EC:4.3.3.6]
K08692	0	0	0	0	0	0	0	0	0	0	6.93031e-05	3.76115e-06	0	0.000587739	0.000417702	0	4.8663e-07	0	malate-CoA ligase subunit alpha [EC:6.2.1.9]
K08714	0	0	0	0	0	0	0	0	0	0	6.93031e-05	3.76115e-06	0	0.000587739	0.000417702	0	4.8663e-07	0	voltage-gated sodium channel
K08776	0.000827957	0.000839839	0.0008503	0.000820719	0.00084148	0.00085228	0.000852347	0.000852023	0.000857732	0.000854701	0.000787536	0.000849031	0.000836048	0.000306647	0.000479331	0.000853549	0.000851603	0.000856797	puromycin-sensitive aminopeptidase [EC:3.4.11.-]
K08851	0.000827957	0.000839839	0.0008503	0.000820719	0.00084148	0.00085228	0.000852347	0.000852023	0.000857732	0.000854701	0.000787536	0.000849031	0.000836048	0.000306647	0.000479331	0.000853549	0.000851603	0.000856797	TP53 regulating kinase and related kinases [EC:2.7.11.1]
K08963	0.000827957	0.000839839	0.0008503	0.000820719	0.00084148	0.00085228	0.000852347	0.000852023	0.000857732	0.000854701	0.000787536	0.000849031	0.000836048	0.000306647	0.000479331	0.000853549	0.000851603	0.000856797	methylthioribose-1-phosphate isomerase [EC:5.3.1.23]
K08971	0	0	0	0	0	0	0	0	0	0	6.93031e-05	3.76115e-06	0	0.000587739	0.000417702	0	4.8663e-07	0	putative membrane protein
K08975	0.000827957	0.000839839	0.0008503	0.000820719	0.00084148	0.00085228	0.000852347	0.000852023	0.000857732	0.000854701	0.000856839	0.000852792	0.000836048	0.000894386	0.000897033	0.000853549	0.000852089	0.000856797	putative membrane protein
K08979	0.000827957	0.000839839	0.0008503	0.000820719	0.00084148	0.00085228	0.000852347	0.000852023	0.000857732	0.000854701	0.000787536	0.000849031	0.000836048	0.000306647	0.000479331	0.000853549	0.000851603	0.000856797	putative membrane protein
K08982	0.000230072	0.000128153	3.86676e-05	0.000292347	0.000113739	2.08236e-05	2.08482e-05	2.434e-05	2.68584e-05	0	0.000100805	1.86078e-05	0.000161651	0	0	1.06604e-05	2.275e-05	2.09833e-05	putative membrane protein
K08997	0	0	0	0	0	0	0	0	0	0	6.93031e-05	3.76115e-06	0	0.000587739	0.000417702	0	4.8663e-07	0	uncharacterized protein
K08999	0.000827957	0.000839839	0.0008503	0.000820719	0.00084148	0.00085228	0.000852347	0.000852023	0.000857732	0.000854701	0.000787536	0.000849031	0.000836048	0.000306647	0.000479331	0.000853549	0.000851603	0.000856797	uncharacterized protein
K09005	0.000827957	0.000839839	0.0008503	0.000820719	0.00084148	0.00085228	0.000852347	0.000852023	0.000857732	0.000854701	0.000787536	0.000849031	0.000836048	0.000306647	0.000479331	0.000853549	0.000851603	0.000856797	uncharacterized protein
K09011	0.000827957	0.000839839	0.0008503	0.000820719	0.00084148	0.00085228	0.000852347	0.000852023	0.000857732	0.000854701	0.000856839	0.000852792	0.000836048	0.000894386	0.000897033	0.000853549	0.000852089	0.000856797	(R)-citramalate synthase [EC:2.3.1.182]
K09013	0.000827957	0.000839839	0.0008503	0.000820719	0.00084148	0.00085228	0.000852347	0.000852023	0.000857732	0.000854701	0.000856839	0.000852792	0.000836048	0.000894386	0.000897033	0.000853549	0.000852089	0.000856797	Fe-S cluster assembly ATP-binding protein
K09014	0.00165591	0.00167968	0.0017006	0.00164144	0.00168296	0.00170456	0.00170469	0.00170405	0.00171546	0.0017094	0.00164437	0.00170182	0.0016721	0.00120103	0.00137636	0.0017071	0.00170369	0.00171359	Fe-S cluster assembly protein SufB
K09015	0.000827957	0.000839839	0.0008503	0.000820719	0.00084148	0.00085228	0.000852347	0.000852023	0.000857732	0.000854701	0.000787536	0.000849031	0.000836048	0.000306647	0.000479331	0.000853549	0.000851603	0.000856797	Fe-S cluster assembly protein SufD
K09022	0.000827957	0.000839839	0.0008503	0.000820719	0.00084148	0.00085228	0.000852347	0.000852023	0.000857732	0.000854701	0.000787536	0.000849031	0.000836048	0.000306647	0.000479331	0.000853549	0.000851603	0.000856797	2-iminobutanoate/2-iminopropanoate deaminase [EC:3.5.99.10]
K09118	0.000827957	0.000839839	0.0008503	0.000820719	0.00084148	0.00085228	0.000852347	0.000852023	0.000857732	0.000854701	0.000787536	0.000849031	0.000836048	0.000306647	0.000479331	0.000853549	0.000851603	0.000856797	uncharacterized protein
K09120	0.000827957	0.000839551	0.000849524	0.000820719	0.00084148	0.00085228	0.000851776	0.000850775	0.000807033	0.000854701	0.000711932	0.000849031	0.000834914	0.000306647	0.000362922	0.00085283	0.000851603	0.000819433	uncharacterized protein
K09121	0.000827957	0.000839839	0.0008503	0.000820719	0.00084148	0.00085228	0.000852347	0.000852023	0.000857732	0.000854701	0.000787536	0.000849031	0.000836048	0.000306647	0.000479331	0.000853549	0.000851603	0.000856797	uncharacterized protein
K09122	0.000230072	0.000128153	3.86676e-05	0.000292347	0.000113739	2.08236e-05	2.08482e-05	2.434e-05	2.68584e-05	0	0.000100805	1.86078e-05	0.000161651	0	0	1.06604e-05	2.275e-05	2.09833e-05	uncharacterized protein
K09123	0.000827957	0.000839839	0.0008503	0.000820719	0.00084148	0.00085228	0.000852347	0.000852023	0.000857732	0.000854701	0.000787536	0.000849031	0.000836048	0.000306647	0.000479331	0.000853549	0.000851603	0.000856797	uncharacterized protein
K09128	0.000827957	0.000839839	0.0008503	0.000820719	0.00084148	0.00085228	0.000852347	0.000852023	0.000857732	0.000854701	0.000787536	0.000849031	0.000836048	0.000306647	0.000479331	0.000853549	0.000851603	0.000856797	uncharacterized protein
K09131	0.000230072	0.000128153	3.86676e-05	0.000292347	0.000113739	2.08236e-05	2.08482e-05	2.434e-05	2.68584e-05	0	0.000100805	1.86078e-05	0.000161651	0	0	1.06604e-05	2.275e-05	2.09833e-05	uncharacterized protein
K09140	0.000827957	0.000839839	0.0008503	0.000820719	0.00084148	0.00085228	0.000852347	0.000852023	0.000857732	0.000854701	0.000856839	0.000852792	0.000836048	0.000894386	0.000897033	0.000853549	0.000852089	0.000856797	pre-rRNA-processing protein TSR3
K09141	0.000597885	0.000711399	0.000810857	0.000528372	0.000727741	0.000831457	0.000830927	0.000826435	0.000780175	0.000854701	0.000611128	0.000830423	0.000673263	0.000306647	0.000362922	0.00084217	0.000828853	0.000798449	uncharacterized protein
K09142	0.000827957	0.000839839	0.0008503	0.000820719	0.00084148	0.00085228	0.000852347	0.000852023	0.000857732	0.000854701	0.000787536	0.000849031	0.000836048	0.000306647	0.000479331	0.000853549	0.000851603	0.000856797	uncharacterized protein
K09143	0.00165591	0.00167939	0.00169982	0.00164144	0.00168296	0.00170456	0.00170412	0.0017028	0.00166477	0.0017094	0.00149947	0.00169806	0.00167096	0.000613293	0.000842252	0.00170638	0.00170321	0.00167623	uncharacterized protein
K09148	0.000827957	0.000839839	0.0008503	0.000820719	0.00084148	0.00085228	0.000852347	0.000852023	0.000857732	0.000854701	0.000787536	0.000849031	0.000836048	0.000306647	0.000479331	0.000853549	0.000851603	0.000856797	uncharacterized protein
K09149	0.00165591	0.0016791	0.00169905	0.00164144	0.00168296	0.00170456	0.00170355	0.00170155	0.00161407	0.0017094	0.00142386	0.00169806	0.00166983	0.000613293	0.000725843	0.00170566	0.00170321	0.00163887	uncharacterized protein
K09152	0.000827957	0.000839839	0.0008503	0.000820719	0.00084148	0.00085228	0.000852347	0.000852023	0.000857732	0.000854701	0.000787536	0.000849031	0.000836048	0.000306647	0.000479331	0.000853549	0.000851603	0.000856797	uncharacterized protein
K09181	0.00165591	0.00167968	0.0017006	0.00164144	0.00168296	0.00170456	0.00170469	0.00170405	0.00171546	0.0017094	0.00157507	0.00169806	0.0016721	0.000613293	0.000958661	0.0017071	0.00170321	0.00171359	acetyltransferase
K09251	0.000597885	0.000711399	0.000810857	0.000528372	0.000727741	0.000831457	0.000830927	0.000826435	0.000780175	0.000854701	0.000611128	0.000830423	0.000673263	0.000306647	0.000362922	0.00084217	0.000828853	0.000798449	putrescine aminotransferase [EC:2.6.1.82]
K09388	0.000597885	0.000711399	0.000810857	0.000528372	0.000727741	0.000831457	0.000830927	0.000826435	0.000780175	0.000854701	0.000611128	0.000830423	0.000673263	0.000306647	0.000362922	0.00084217	0.000828853	0.000798449	uncharacterized protein
K09458	0	0	0	0	0	0	0	0	0	0	6.93031e-05	3.76115e-06	0	0.000587739	0.000417702	0	4.8663e-07	0	3-oxoacyl-[acyl-carrier-protein] synthase II [EC:2.3.1.179]
K09459	0.00119577	0.0014228	0.00162171	0.00105674	0.00145548	0.00166291	0.00166185	0.00165287	0.00156035	0.0017094	0.00122226	0.00166085	0.00134653	0.000613293	0.000725843	0.00168434	0.00165771	0.0015969	phosphonopyruvate decarboxylase [EC:4.1.1.82]
K09472	0.000230072	0.000128153	3.86676e-05	0.000292347	0.000113739	2.08236e-05	2.08482e-05	2.434e-05	2.68584e-05	0	0.000170108	2.2369e-05	0.000161651	0.000587739	0.000417702	1.06604e-05	2.32366e-05	2.09833e-05	4-(gamma-glutamylamino)butanal dehydrogenase [EC:1.2.1.99]
K09482	0.00105803	0.000967992	0.000888968	0.00111307	0.000955219	0.000873104	0.000873195	0.000876363	0.00088459	0.000854701	0.000957643	0.0008714	0.000997699	0.000894386	0.000897033	0.000864209	0.000874839	0.00087778	glutamyl-tRNA(Gln) amidotransferase subunit D [EC:6.3.5.7]
K09689	0	0	0	0	0	0	0	0	0	0	6.93031e-05	3.76115e-06	0	0.000587739	0.000417702	0	4.8663e-07	0	capsular polysaccharide transport system ATP-binding protein [EC:3.6.3.38]
K09691	0	0	0	0	0	0	0	0	0	0	0.000346516	1.88058e-05	0	0.0029387	0.00208851	0	2.43315e-06	0	lipopolysaccharide transport system ATP-binding protein
K09693	0	0	0	0	0	0	0	0	0	0	6.93031e-05	3.76115e-06	0	0.000587739	0.000417702	0	4.8663e-07	0	teichoic acid transport system ATP-binding protein [EC:3.6.3.40]
K09696	0	0	0	0	0	0	0	0	0	0	6.93031e-05	3.76115e-06	0	0.000587739	0.000417702	0	4.8663e-07	0	sodium transport system permease protein
K09697	0	0	0	0	0	0	0	0	0	0	6.93031e-05	3.76115e-06	0	0.000587739	0.000417702	0	4.8663e-07	0	sodium transport system ATP-binding protein [EC:3.6.3.7]
K09699	0	0	0	0	0	0	0	0	0	0	6.93031e-05	3.76115e-06	0	0.000587739	0.000417702	0	4.8663e-07	0	2-oxoisovalerate dehydrogenase E2 component (dihydrolipoyl transacylase) [EC:2.3.1.168]
K09716	0.000827957	0.000839839	0.0008503	0.000820719	0.00084148	0.00085228	0.000852347	0.000852023	0.000857732	0.000854701	0.000787536	0.000849031	0.000836048	0.000306647	0.000479331	0.000853549	0.000851603	0.000856797	D-aminoacyl-tRNA deacylase [EC:3.1.1.96]
K09721	0.000827957	0.000839839	0.0008503	0.000820719	0.00084148	0.00085228	0.000852347	0.000852023	0.000857732	0.000854701	0.000787536	0.000849031	0.000836048	0.000306647	0.000479331	0.000853549	0.000851603	0.000856797	uncharacterized protein
K09722	0.000827957	0.000839839	0.0008503	0.000820719	0.00084148	0.00085228	0.000852347	0.000852023	0.000857732	0.000854701	0.000856839	0.000852792	0.000836048	0.000894386	0.000897033	0.000853549	0.000852089	0.000856797	4-phosphopantoate---beta-alanine ligase [EC:6.3.2.36]
K09723	0.00165591	0.00167968	0.0017006	0.00164144	0.00168296	0.00170456	0.00170469	0.00170405	0.00171546	0.0017094	0.00157507	0.00169806	0.0016721	0.000613293	0.000958661	0.0017071	0.00170321	0.00171359	DNA replication factor GINS
K09726	0.000827957	0.000839839	0.0008503	0.000820719	0.00084148	0.00085228	0.000852347	0.000852023	0.000857732	0.000854701	0.000856839	0.000852792	0.000836048	0.000894386	0.000897033	0.000853549	0.000852089	0.000856797	uncharacterized protein
K09735	0.000827957	0.000839839	0.0008503	0.000820719	0.00084148	0.00085228	0.000852347	0.000852023	0.000857732	0.000854701	0.000856839	0.000852792	0.000836048	0.000894386	0.000897033	0.000853549	0.000852089	0.000856797	uncharacterized protein
K09736	0.000827957	0.000839839	0.0008503	0.000820719	0.00084148	0.00085228	0.000852347	0.000852023	0.000857732	0.000854701	0.000787536	0.000849031	0.000836048	0.000306647	0.000479331	0.000853549	0.000851603	0.000856797	uncharacterized protein
K09738	0.000827957	0.000839839	0.0008503	0.000820719	0.00084148	0.00085228	0.000852347	0.000852023	0.000857732	0.000854701	0.000787536	0.000849031	0.000836048	0.000306647	0.000479331	0.000853549	0.000851603	0.000856797	uncharacterized protein
K09741	0.000827957	0.000839839	0.0008503	0.000820719	0.00084148	0.00085228	0.000852347	0.000852023	0.000857732	0.000854701	0.000787536	0.000849031	0.000836048	0.000306647	0.000479331	0.000853549	0.000851603	0.000856797	KEOPS complex subunit Pcc1
K09759	0	2.88307e-07	7.75939e-07	0	0	0	5.71182e-07	1.2482e-06	5.06989e-05	0	0.000144907	3.76115e-06	1.13439e-06	0.000587739	0.000534111	7.18677e-07	4.8663e-07	3.73639e-05	nondiscriminating aspartyl-tRNA synthetase [EC:6.1.1.23]
K09763	0.000827957	0.000839839	0.0008503	0.000820719	0.00084148	0.00085228	0.000852347	0.000852023	0.000857732	0.000854701	0.000787536	0.000849031	0.000836048	0.000306647	0.000479331	0.000853549	0.000851603	0.000856797	uncharacterized protein
K09771	0.00165591	0.0016791	0.00169905	0.00164144	0.00168296	0.00170456	0.00170355	0.00170155	0.00161407	0.0017094	0.00142386	0.00169806	0.00166983	0.000613293	0.000725843	0.00170566	0.00170321	0.00163887	small multidrug resistance family-3 protein
K09807	0.000597885	0.000711687	0.000811633	0.000528372	0.000727741	0.000831457	0.000831499	0.000827683	0.000830874	0.000854701	0.000686731	0.000830423	0.000674397	0.000306647	0.000479331	0.000842889	0.000828853	0.000835813	uncharacterized protein
K09808	0.000827957	0.000839839	0.0008503	0.000820719	0.00084148	0.00085228	0.000852347	0.000852023	0.000857732	0.000854701	0.000787536	0.000849031	0.000836048	0.000306647	0.000479331	0.000853549	0.000851603	0.000856797	lipoprotein-releasing system permease protein
K09810	0.000827957	0.000839839	0.0008503	0.000820719	0.00084148	0.00085228	0.000852347	0.000852023	0.000857732	0.000854701	0.000995445	0.000860314	0.000836048	0.00206986	0.00173244	0.000853549	0.000853063	0.000856797	lipoprotein-releasing system ATP-binding protein [EC:3.6.3.-]
K09812	0.000230072	0.000128729	4.02195e-05	0.000292347	0.000113739	2.08236e-05	2.19905e-05	2.68364e-05	0.000128256	0	0.000529224	3.36524e-05	0.00016392	0.00235096	0.00190363	1.20977e-05	2.46965e-05	9.5711e-05	cell division transport system ATP-binding protein
K09815	0.00142584	0.00155124	0.00166116	0.00134909	0.00156922	0.00168374	0.00168327	0.00167846	0.00163791	0.0017094	0.00139866	0.00167945	0.00150931	0.000613293	0.000842252	0.00169572	0.00168046	0.00165525	zinc transport system substrate-binding protein
K09816	0.000827957	0.000839839	0.0008503	0.000820719	0.00084148	0.00085228	0.000852347	0.000852023	0.000857732	0.000854701	0.000856839	0.000852792	0.000836048	0.000894386	0.000897033	0.000853549	0.000852089	0.000856797	zinc transport system permease protein
K09817	0.00142584	0.00155153	0.00166193	0.00134909	0.00156922	0.00168374	0.00168385	0.00167971	0.00168861	0.0017094	0.00154357	0.00168321	0.00151045	0.00120103	0.00137636	0.00169644	0.00168094	0.00169261	zinc transport system ATP-binding protein [EC:3.6.3.-]
K09820	0.000597885	0.000711399	0.000810857	0.000528372	0.000727741	0.000831457	0.000830927	0.000826435	0.000780175	0.000854701	0.000680431	0.000834184	0.000673263	0.000894386	0.000780624	0.00084217	0.000829339	0.000798449	manganese/iron transport system ATP-binding protein
K09866	0.000827957	0.000839839	0.0008503	0.000820719	0.00084148	0.00085228	0.000852347	0.000852023	0.000857732	0.000854701	0.000787536	0.000849031	0.000836048	0.000306647	0.000479331	0.000853549	0.000851603	0.000856797	aquaporin-4
K09903	0.000827957	0.000839839	0.0008503	0.000820719	0.00084148	0.00085228	0.000852347	0.000852023	0.000857732	0.000854701	0.000787536	0.000849031	0.000836048	0.000306647	0.000479331	0.000853549	0.000851603	0.000856797	uridylate kinase [EC:2.7.4.22]
K09966	0	0	0	0	0	0	0	0	0	0	6.93031e-05	3.76115e-06	0	0.000587739	0.000417702	0	4.8663e-07	0	uncharacterized protein
K09972	0	0	0	0	0	0	0	0	0	0	0.000138606	7.52231e-06	0	0.00117548	0.000835405	0	9.7326e-07	0	general L-amino acid transport system ATP-binding protein [EC:3.6.3.-]
K10026	0.000827957	0.000839839	0.0008503	0.000820719	0.00084148	0.00085228	0.000852347	0.000852023	0.000857732	0.000854701	0.000856839	0.000852792	0.000836048	0.000894386	0.000897033	0.000853549	0.000852089	0.000856797	7-carboxy-7-deazaguanine synthase [EC:4.3.99.3]
K10027	0	0	0	0	0	0	0	0	0	0	6.93031e-05	3.76115e-06	0	0.000587739	0.000417702	0	4.8663e-07	0	phytoene desaturase [EC:1.3.99.26 1.3.99.28 1.3.99.29 1.3.99.31]
K10112	0	0	0	0	0	0	0	0	0	0	0.000138606	7.52231e-06	0	0.00117548	0.000835405	0	9.7326e-07	0	multiple sugar transport system ATP-binding protein
K10125	0.000230072	0.000128153	3.86676e-05	0.000292347	0.000113739	2.08236e-05	2.08482e-05	2.434e-05	2.68584e-05	0	0.000100805	1.86078e-05	0.000161651	0	0	1.06604e-05	2.275e-05	2.09833e-05	two-component system, NtrC family, C4-dicarboxylate transport sensor histidine kinase DctB [EC:2.7.13.3]
K10217	0	0	0	0	0	0	0	0	0	0	0.000138606	7.52231e-06	0	0.00117548	0.000835405	0	9.7326e-07	0	aminomuconate-semialdehyde/2-hydroxymuconate-6-semialdehyde dehydrogenase [EC:1.2.1.32 1.2.1.85]
K10441	0	2.88307e-07	7.75939e-07	0	0	0	5.71182e-07	1.2482e-06	5.06989e-05	0	7.56034e-05	0	1.13439e-06	0	0.000116409	7.18677e-07	0	3.73639e-05	ribose transport system ATP-binding protein [EC:3.6.3.17]
K10563	0	0	0	0	0	0	0	0	0	0	6.93031e-05	3.76115e-06	0	0.000587739	0.000417702	0	4.8663e-07	0	formamidopyrimidine-DNA glycosylase [EC:3.2.2.23 4.2.99.18]
K10674	0.000597885	0.000711399	0.000810857	0.000528372	0.000727741	0.000831457	0.000830927	0.000826435	0.000780175	0.000854701	0.000611128	0.000830423	0.000673263	0.000306647	0.000362922	0.00084217	0.000828853	0.000798449	ectoine hydroxylase [EC:1.14.11.55]
K10680	0	0	0	0	0	0	0	0	0	0	6.93031e-05	3.76115e-06	0	0.000587739	0.000417702	0	4.8663e-07	0	N-ethylmaleimide reductase [EC:1.-.-.-]
K10716	0.00105803	0.000967704	0.000888192	0.00111307	0.000955219	0.000873104	0.000872624	0.000875115	0.000833891	0.000854701	0.00088204	0.0008714	0.000996565	0.000894386	0.000780624	0.000863491	0.000874839	0.000840416	voltage-gated potassium channel
K10725	0.00165591	0.00167939	0.00169982	0.00164144	0.00168296	0.00170456	0.00170412	0.0017028	0.00166477	0.0017094	0.00163807	0.00170558	0.00167096	0.00178877	0.00167766	0.00170638	0.00170418	0.00167623	archaeal cell division control protein 6
K10726	0.000827957	0.000839839	0.0008503	0.000820719	0.00084148	0.00085228	0.000852347	0.000852023	0.000857732	0.000854701	0.000926142	0.000856553	0.000836048	0.00148213	0.00131474	0.000853549	0.000852576	0.000856797	replicative DNA helicase Mcm [EC:3.6.4.-]
K10742	0	0	0	0	0	0	0	0	0	0	6.93031e-05	3.76115e-06	0	0.000587739	0.000417702	0	4.8663e-07	0	DNA replication ATP-dependent helicase Dna2 [EC:3.6.4.12]
K10747	0.000827957	0.000839839	0.0008503	0.000820719	0.00084148	0.00085228	0.000852347	0.000852023	0.000857732	0.000854701	0.000787536	0.000849031	0.000836048	0.000306647	0.000479331	0.000853549	0.000851603	0.000856797	DNA ligase 1 [EC:6.5.1.1 6.5.1.6 6.5.1.7]
K10764	0	0	0	0	0	0	0	0	0	0	0.000138606	7.52231e-06	0	0.00117548	0.000835405	0	9.7326e-07	0	O-succinylhomoserine sulfhydrylase [EC:2.5.1.-]
K10773	0.000827957	0.000839839	0.0008503	0.000820719	0.00084148	0.00085228	0.000852347	0.000852023	0.000857732	0.000854701	0.000856839	0.000852792	0.000836048	0.000894386	0.000897033	0.000853549	0.000852089	0.000856797	endonuclease III [EC:4.2.99.18]
K10778	0.000597885	0.000711687	0.000811633	0.000528372	0.000727741	0.000831457	0.000831499	0.000827683	0.000830874	0.000854701	0.000756034	0.000834184	0.000674397	0.000894386	0.000897033	0.000842889	0.000829339	0.000835813	AraC family transcriptional regulator, regulatory protein of adaptative response / methylated-DNA-[protein]-cysteine methyltransferase [EC:2.1.1.63]
K10800	0	0	0	0	0	0	0	0	0	0	6.93031e-05	3.76115e-06	0	0.000587739	0.000417702	0	4.8663e-07	0	single-strand selective monofunctional uracil DNA glycosylase [EC:3.2.2.-]
K10823	0.00142584	0.00155153	0.00166193	0.00134909	0.00156922	0.00168374	0.00168385	0.00167971	0.00168861	0.0017094	0.00147427	0.00167945	0.00151045	0.000613293	0.000958661	0.00169644	0.00168046	0.00169261	oligopeptide transport system ATP-binding protein
K10831	0	0	0	0	0	0	0	0	0	0	6.93031e-05	3.76115e-06	0	0.000587739	0.000417702	0	4.8663e-07	0	taurine transport system ATP-binding protein [EC:3.6.3.36]
K10848	0.000827957	0.000839839	0.0008503	0.000820719	0.00084148	0.00085228	0.000852347	0.000852023	0.000857732	0.000854701	0.000787536	0.000849031	0.000836048	0.000306647	0.000479331	0.000853549	0.000851603	0.000856797	DNA excision repair protein ERCC-4 [EC:3.1.-.-]
K10896	0.00105803	0.000967992	0.000888968	0.00111307	0.000955219	0.000873104	0.000873195	0.000876363	0.00088459	0.000854701	0.000957643	0.0008714	0.000997699	0.000894386	0.000897033	0.000864209	0.000874839	0.00087778	fanconi anemia group M protein
K10907	0.000230072	0.000128441	3.94436e-05	0.000292347	0.000113739	2.08236e-05	2.14193e-05	2.55882e-05	7.75573e-05	0	0.000315014	2.61301e-05	0.000162786	0.00117548	0.000951814	1.13791e-05	2.37232e-05	5.83472e-05	aminotransferase [EC:2.6.1.-]
K10942	0.000230072	0.000128153	3.86676e-05	0.000292347	0.000113739	2.08236e-05	2.08482e-05	2.434e-05	2.68584e-05	0	0.000100805	1.86078e-05	0.000161651	0	0	1.06604e-05	2.275e-05	2.09833e-05	two-component system, sensor histidine kinase FlrB [EC:2.7.13.3]
K10944	0.000827957	0.000839839	0.0008503	0.000820719	0.00084148	0.00085228	0.000852347	0.000852023	0.000857732	0.000854701	0.000787536	0.000849031	0.000836048	0.000306647	0.000479331	0.000853549	0.000851603	0.000856797	methane/ammonia monooxygenase subunit A [EC:1.14.18.3 1.14.99.39]
K10945	0.000827957	0.000839839	0.0008503	0.000820719	0.00084148	0.00085228	0.000852347	0.000852023	0.000857732	0.000854701	0.000787536	0.000849031	0.000836048	0.000306647	0.000479331	0.000853549	0.000851603	0.000856797	methane/ammonia monooxygenase subunit B
K10946	0.000827957	0.000839839	0.0008503	0.000820719	0.00084148	0.00085228	0.000852347	0.000852023	0.000857732	0.000854701	0.000787536	0.000849031	0.000836048	0.000306647	0.000479331	0.000853549	0.000851603	0.000856797	methane/ammonia monooxygenase subunit C
K10956	0.000827957	0.000839839	0.0008503	0.000820719	0.00084148	0.00085228	0.000852347	0.000852023	0.000857732	0.000854701	0.000787536	0.000849031	0.000836048	0.000306647	0.000479331	0.000853549	0.000851603	0.000856797	protein transport protein SEC61 subunit alpha
K10960	0	2.88307e-07	7.75939e-07	0	0	0	5.71182e-07	1.2482e-06	5.06989e-05	0	7.56034e-05	0	1.13439e-06	0	0.000116409	7.18677e-07	0	3.73639e-05	geranylgeranyl diphosphate/geranylgeranyl-bacteriochlorophyllide a reductase [EC:1.3.1.83 1.3.1.111]
K10977	0.000827957	0.000839551	0.000849524	0.000820719	0.00084148	0.00085228	0.000851776	0.000850775	0.000807033	0.000854701	0.000711932	0.000849031	0.000834914	0.000306647	0.000362922	0.00085283	0.000851603	0.000819433	methanogen homocitrate synthase [EC:2.3.3.14 2.3.3.-]
K10978	0.000230072	0.000128441	3.94436e-05	0.000292347	0.000113739	2.08236e-05	2.14193e-05	2.55882e-05	7.75573e-05	0	0.000245711	2.2369e-05	0.000162786	0.000587739	0.000534111	1.13791e-05	2.32366e-05	5.83472e-05	methanogen homoisocitrate dehydrogenase [EC:1.1.1.87 1.1.1.-]
K11004	0	2.88307e-07	7.75939e-07	0	0	0	5.71182e-07	1.2482e-06	5.06989e-05	0	0.000144907	3.76115e-06	1.13439e-06	0.000587739	0.000534111	7.18677e-07	4.8663e-07	3.73639e-05	ATP-binding cassette, subfamily B, bacterial HlyB/CyaB
K11072	0	0	0	0	0	0	0	0	0	0	0.000138606	7.52231e-06	0	0.00117548	0.000835405	0	9.7326e-07	0	spermidine/putrescine transport system ATP-binding protein [EC:3.6.3.31]
K11085	0	0	0	0	0	0	0	0	0	0	0.000138606	7.52231e-06	0	0.00117548	0.000835405	0	9.7326e-07	0	ATP-binding cassette, subfamily B, bacterial MsbA [EC:3.6.3.-]
K11102	0.000230072	0.000128153	3.86676e-05	0.000292347	0.000113739	2.08236e-05	2.08482e-05	2.434e-05	2.68584e-05	0	0.000100805	1.86078e-05	0.000161651	0	0	1.06604e-05	2.275e-05	2.09833e-05	proton glutamate symport protein
K11105	0.000827957	0.000839839	0.0008503	0.000820719	0.00084148	0.00085228	0.000852347	0.000852023	0.000857732	0.000854701	0.000787536	0.000849031	0.000836048	0.000306647	0.000479331	0.000853549	0.000851603	0.000856797	cell volume regulation protein A
K11130	0.000827957	0.000839839	0.0008503	0.000820719	0.00084148	0.00085228	0.000852347	0.000852023	0.000857732	0.000854701	0.000787536	0.000849031	0.000836048	0.000306647	0.000479331	0.000853549	0.000851603	0.000856797	H/ACA ribonucleoprotein complex subunit 3
K11131	0.000827957	0.000839839	0.0008503	0.000820719	0.00084148	0.00085228	0.000852347	0.000852023	0.000857732	0.000854701	0.000856839	0.000852792	0.000836048	0.000894386	0.000897033	0.000853549	0.000852089	0.000856797	H/ACA ribonucleoprotein complex subunit 4 [EC:5.4.99.-]
K11175	0.00165591	0.00167968	0.0017006	0.00164144	0.00168296	0.00170456	0.00170469	0.00170405	0.00171546	0.0017094	0.00171368	0.00170558	0.0016721	0.00178877	0.00179407	0.0017071	0.00170418	0.00171359	phosphoribosylglycinamide formyltransferase 1 [EC:2.1.2.2]
K11212	0.000827957	0.000839839	0.0008503	0.000820719	0.00084148	0.00085228	0.000852347	0.000852023	0.000857732	0.000854701	0.000787536	0.000849031	0.000836048	0.000306647	0.000479331	0.000853549	0.000851603	0.000856797	LPPG:FO 2-phospho-L-lactate transferase [EC:2.7.8.28]
K11263	0.000827957	0.000839839	0.0008503	0.000820719	0.00084148	0.00085228	0.000852347	0.000852023	0.000857732	0.000854701	0.000926142	0.000856553	0.000836048	0.00148213	0.00131474	0.000853549	0.000852576	0.000856797	acetyl-CoA/propionyl-CoA carboxylase, biotin carboxylase, biotin carboxyl carrier protein [EC:6.4.1.2 6.4.1.3 6.3.4.14]
K11356	0.000597885	0.000711399	0.000810857	0.000528372	0.000727741	0.000831457	0.000830927	0.000826435	0.000780175	0.000854701	0.000611128	0.000830423	0.000673263	0.000306647	0.000362922	0.00084217	0.000828853	0.000798449	two-component system, sensor histidine kinase and response regulator [EC:2.7.13.3]
K11381	0	0	0	0	0	0	0	0	0	0	6.93031e-05	3.76115e-06	0	0.000587739	0.000417702	0	4.8663e-07	0	2-oxoisovalerate dehydrogenase E1 component [EC:1.2.4.4]
K11473	0	0	0	0	0	0	0	0	0	0	6.93031e-05	3.76115e-06	0	0.000587739	0.000417702	0	4.8663e-07	0	glycolate oxidase iron-sulfur subunit
K11529	0.000827957	0.000839839	0.0008503	0.000820719	0.00084148	0.00085228	0.000852347	0.000852023	0.000857732	0.000854701	0.000787536	0.000849031	0.000836048	0.000306647	0.000479331	0.000853549	0.000851603	0.000856797	glycerate 2-kinase [EC:2.7.1.165]
K11532	0	0	0	0	0	0	0	0	0	0	6.93031e-05	3.76115e-06	0	0.000587739	0.000417702	0	4.8663e-07	0	fructose-1,6-bisphosphatase II / sedoheptulose-1,7-bisphosphatase [EC:3.1.3.11 3.1.3.37]
K11600	0.000827957	0.000839839	0.0008503	0.000820719	0.00084148	0.00085228	0.000852347	0.000852023	0.000857732	0.000854701	0.000856839	0.000852792	0.000836048	0.000894386	0.000897033	0.000853549	0.000852089	0.000856797	exosome complex component RRP41
K11607	0.000597885	0.000711399	0.000810857	0.000528372	0.000727741	0.000831457	0.000830927	0.000826435	0.000780175	0.000854701	0.000611128	0.000830423	0.000673263	0.000306647	0.000362922	0.00084217	0.000828853	0.000798449	manganese/iron transport system ATP-binding protein
K11624	0.000230072	0.000128153	3.86676e-05	0.000292347	0.000113739	2.08236e-05	2.08482e-05	2.434e-05	2.68584e-05	0	0.000100805	1.86078e-05	0.000161651	0	0	1.06604e-05	2.275e-05	2.09833e-05	two-component system, NarL family, response regulator YdfI
K11635	0	2.88307e-07	7.75939e-07	0	0	0	5.71182e-07	1.2482e-06	5.06989e-05	0	7.56034e-05	0	1.13439e-06	0	0.000116409	7.18677e-07	0	3.73639e-05	putative ABC transport system ATP-binding protein
K11645	0	2.88307e-07	7.75939e-07	0	0	0	5.71182e-07	1.2482e-06	5.06989e-05	0	0.000144907	3.76115e-06	1.13439e-06	0.000587739	0.000534111	7.18677e-07	4.8663e-07	3.73639e-05	fructose-bisphosphate aldolase, class I [EC:4.1.2.13]
K11646	0.000827957	0.000839839	0.0008503	0.000820719	0.00084148	0.00085228	0.000852347	0.000852023	0.000857732	0.000854701	0.000856839	0.000852792	0.000836048	0.000894386	0.000897033	0.000853549	0.000852089	0.000856797	3-dehydroquinate synthase II [EC:1.4.1.24]
K11707	0.000597885	0.000711399	0.000810857	0.000528372	0.000727741	0.000831457	0.000830927	0.000826435	0.000780175	0.000854701	0.000611128	0.000830423	0.000673263	0.000306647	0.000362922	0.00084217	0.000828853	0.000798449	manganese/zinc/iron transport system substrate-binding protein
K11708	0.000597885	0.000711399	0.000810857	0.000528372	0.000727741	0.000831457	0.000830927	0.000826435	0.000780175	0.000854701	0.000611128	0.000830423	0.000673263	0.000306647	0.000362922	0.00084217	0.000828853	0.000798449	manganese/zinc/iron transport system permease protein
K11709	0.00119577	0.0014228	0.00162171	0.00105674	0.00145548	0.00166291	0.00166185	0.00165287	0.00156035	0.0017094	0.00122226	0.00166085	0.00134653	0.000613293	0.000725843	0.00168434	0.00165771	0.0015969	manganese/zinc/iron transport system permease protein
K11710	0.000597885	0.000711399	0.000810857	0.000528372	0.000727741	0.000831457	0.000830927	0.000826435	0.000780175	0.000854701	0.000611128	0.000830423	0.000673263	0.000306647	0.000362922	0.00084217	0.000828853	0.000798449	manganese/zinc/iron transport system ATP- binding protein
K11717	0.00165591	0.00167968	0.0017006	0.00164144	0.00168296	0.00170456	0.00170469	0.00170405	0.00171546	0.0017094	0.00171368	0.00170558	0.0016721	0.00178877	0.00179407	0.0017071	0.00170418	0.00171359	cysteine desulfurase / selenocysteine lyase [EC:2.8.1.7 4.4.1.16]
K11731	0	0	0	0	0	0	0	0	0	0	6.93031e-05	3.76115e-06	0	0.000587739	0.000417702	0	4.8663e-07	0	citronellyl-CoA dehydrogenase [EC:1.3.99.-]
K11741	0	0	0	0	0	0	0	0	0	0	6.93031e-05	3.76115e-06	0	0.000587739	0.000417702	0	4.8663e-07	0	quaternary ammonium compound-resistance protein SugE
K11752	0.000827957	0.000839839	0.0008503	0.000820719	0.00084148	0.00085228	0.000852347	0.000852023	0.000857732	0.000854701	0.000856839	0.000852792	0.000836048	0.000894386	0.000897033	0.000853549	0.000852089	0.000856797	diaminohydroxyphosphoribosylaminopyrimidine deaminase / 5-amino-6-(5-phosphoribosylamino)uracil reductase [EC:3.5.4.26 1.1.1.193]
K11754	0	0	0	0	0	0	0	0	0	0	6.93031e-05	3.76115e-06	0	0.000587739	0.000417702	0	4.8663e-07	0	dihydrofolate synthase / folylpolyglutamate synthase [EC:6.3.2.12 6.3.2.17]
K11755	0.000827957	0.000839839	0.0008503	0.000820719	0.00084148	0.00085228	0.000852347	0.000852023	0.000857732	0.000854701	0.000787536	0.000849031	0.000836048	0.000306647	0.000479331	0.000853549	0.000851603	0.000856797	phosphoribosyl-ATP pyrophosphohydrolase / phosphoribosyl-AMP cyclohydrolase [EC:3.6.1.31 3.5.4.19]
K11779	0.00142584	0.00155153	0.00166193	0.00134909	0.00156922	0.00168374	0.00168385	0.00167971	0.00168861	0.0017094	0.00154357	0.00168321	0.00151045	0.00120103	0.00137636	0.00169644	0.00168094	0.00169261	FO synthase [EC:2.5.1.77]
K11780	0.000827957	0.000839839	0.0008503	0.000820719	0.00084148	0.00085228	0.000852347	0.000852023	0.000857732	0.000854701	0.000787536	0.000849031	0.000836048	0.000306647	0.000479331	0.000853549	0.000851603	0.000856797	FO synthase subunit 1 [EC:2.5.1.77]
K11781	0.00165591	0.00167968	0.0017006	0.00164144	0.00168296	0.00170456	0.00170469	0.00170405	0.00171546	0.0017094	0.00164437	0.00170182	0.0016721	0.00120103	0.00137636	0.0017071	0.00170369	0.00171359	FO synthase subunit 2 [EC:2.5.1.77]
K11782	0.000597885	0.000711399	0.000810857	0.000528372	0.000727741	0.000831457	0.000830927	0.000826435	0.000780175	0.000854701	0.000611128	0.000830423	0.000673263	0.000306647	0.000362922	0.00084217	0.000828853	0.000798449	chorismate dehydratase [EC:4.2.1.151]
K11784	0.0022538	0.00239137	0.00251223	0.00216981	0.0024107	0.00253602	0.00253619	0.00253173	0.00254634	0.0025641	0.00240041	0.00253601	0.00234649	0.00209542	0.0022734	0.00254999	0.00253303	0.00254941	cyclic dehypoxanthinyl futalosine synthase [EC:1.21.98.1]
K11785	0.00105803	0.000967992	0.000888968	0.00111307	0.000955219	0.000873104	0.000873195	0.000876363	0.00088459	0.000854701	0.000957643	0.0008714	0.000997699	0.000894386	0.000897033	0.000864209	0.000874839	0.00087778	1,4-dihydroxy-6-naphthoate synthase [EC:1.14.-.-]
K11912	0	0	0	0	0	0	0	0	0	0	6.93031e-05	3.76115e-06	0	0.000587739	0.000417702	0	4.8663e-07	0	serine/threonine-protein kinase PpkA [EC:2.7.11.1]
K11924	0.000597885	0.000711687	0.000811633	0.000528372	0.000727741	0.000831457	0.000831499	0.000827683	0.000830874	0.000854701	0.000686731	0.000830423	0.000674397	0.000306647	0.000479331	0.000842889	0.000828853	0.000835813	DtxR family transcriptional regulator, manganese transport regulator
K11927	0.000827957	0.000839839	0.0008503	0.000820719	0.00084148	0.00085228	0.000852347	0.000852023	0.000857732	0.000854701	0.000995445	0.000860314	0.000836048	0.00206986	0.00173244	0.000853549	0.000853063	0.000856797	ATP-dependent RNA helicase RhlE [EC:3.6.4.13]
K11928	0	0	0	0	0	0	0	0	0	0	6.93031e-05	3.76115e-06	0	0.000587739	0.000417702	0	4.8663e-07	0	sodium/proline symporter
K11942	0	0	0	0	0	0	0	0	0	0	6.93031e-05	3.76115e-06	0	0.000587739	0.000417702	0	4.8663e-07	0	isobutyryl-CoA mutase [EC:5.4.99.13]
K11955	0	0	0	0	0	0	0	0	0	0	6.93031e-05	3.76115e-06	0	0.000587739	0.000417702	0	4.8663e-07	0	neutral amino acid transport system permease protein
K11963	0	0	0	0	0	0	0	0	0	0	6.93031e-05	3.76115e-06	0	0.000587739	0.000417702	0	4.8663e-07	0	urea transport system ATP-binding protein
K12055	0	0	0	0	0	0	0	0	0	0	6.93031e-05	3.76115e-06	0	0.000587739	0.000417702	0	4.8663e-07	0	chromosome partitioning related protein ParA
K12132	0	0	0	0	0	0	0	0	0	0	6.93031e-05	3.76115e-06	0	0.000587739	0.000417702	0	4.8663e-07	0	eukaryotic-like serine/threonine-protein kinase [EC:2.7.11.1]
K12234	0.000827957	0.000839839	0.0008503	0.000820719	0.00084148	0.00085228	0.000852347	0.000852023	0.000857732	0.000854701	0.000787536	0.000849031	0.000836048	0.000306647	0.000479331	0.000853549	0.000851603	0.000856797	coenzyme F420-0:L-glutamate ligase / coenzyme F420-1:gamma-L-glutamate ligase [EC:6.3.2.31 6.3.2.34]
K12267	0.000230072	0.000128441	3.94436e-05	0.000292347	0.000113739	2.08236e-05	2.14193e-05	2.55882e-05	7.75573e-05	0	0.000245711	2.2369e-05	0.000162786	0.000587739	0.000534111	1.13791e-05	2.32366e-05	5.83472e-05	peptide methionine sulfoxide reductase msrA/msrB [EC:1.8.4.11 1.8.4.12]
K12339	0.000827957	0.000839839	0.0008503	0.000820719	0.00084148	0.00085228	0.000852347	0.000852023	0.000857732	0.000854701	0.000856839	0.000852792	0.000836048	0.000894386	0.000897033	0.000853549	0.000852089	0.000856797	cysteine synthase B [EC:2.5.1.47]
K12410	0.000827957	0.000839551	0.000849524	0.000820719	0.00084148	0.00085228	0.000851776	0.000850775	0.000807033	0.000854701	0.000781235	0.000852792	0.000834914	0.000894386	0.000780624	0.00085283	0.000852089	0.000819433	NAD-dependent deacetylase [EC:3.5.1.-]
K12420	0	2.88307e-07	7.75939e-07	0	0	0	5.71182e-07	1.2482e-06	5.06989e-05	0	7.56034e-05	0	1.13439e-06	0	0.000116409	7.18677e-07	0	3.73639e-05	ketoreductase [EC:1.1.1.-]
K12454	0.000597885	0.000711399	0.000810857	0.000528372	0.000727741	0.000831457	0.000830927	0.000826435	0.000780175	0.000854701	0.000611128	0.000830423	0.000673263	0.000306647	0.000362922	0.00084217	0.000828853	0.000798449	CDP-paratose 2-epimerase [EC:5.1.3.10]
K12503	0.000827957	0.000839839	0.0008503	0.000820719	0.00084148	0.00085228	0.000852347	0.000852023	0.000857732	0.000854701	0.000856839	0.000852792	0.000836048	0.000894386	0.000897033	0.000853549	0.000852089	0.000856797	short-chain Z-isoprenyl diphosphate synthase [EC:2.5.1.68]
K12524	0	2.88307e-07	7.75939e-07	0	0	0	5.71182e-07	1.2482e-06	5.06989e-05	0	7.56034e-05	0	1.13439e-06	0	0.000116409	7.18677e-07	0	3.73639e-05	bifunctional aspartokinase / homoserine dehydrogenase 1 [EC:2.7.2.4 1.1.1.3]
K12567	0.000597885	0.000711399	0.000810857	0.000528372	0.000727741	0.000831457	0.000830927	0.000826435	0.000780175	0.000854701	0.000611128	0.000830423	0.000673263	0.000306647	0.000362922	0.00084217	0.000828853	0.000798449	titin [EC:2.7.11.1]
K12573	0	0	0	0	0	0	0	0	0	0	6.93031e-05	3.76115e-06	0	0.000587739	0.000417702	0	4.8663e-07	0	ribonuclease R [EC:3.1.-.-]
K12589	0.000827957	0.000839839	0.0008503	0.000820719	0.00084148	0.00085228	0.000852347	0.000852023	0.000857732	0.000854701	0.000856839	0.000852792	0.000836048	0.000894386	0.000897033	0.000853549	0.000852089	0.000856797	exosome complex component RRP42
K12953	0	0	0	0	0	0	0	0	0	0	6.93031e-05	3.76115e-06	0	0.000587739	0.000417702	0	4.8663e-07	0	cation-transporting P-type ATPase F [EC:3.6.3.-]
K12957	0	2.88307e-07	7.75939e-07	0	0	0	5.71182e-07	1.2482e-06	5.06989e-05	0	7.56034e-05	0	1.13439e-06	0	0.000116409	7.18677e-07	0	3.73639e-05	uncharacterized zinc-type alcohol dehydrogenase-like protein [EC:1.-.-.-]
K12960	0.000230072	0.000128441	3.94436e-05	0.000292347	0.000113739	2.08236e-05	2.14193e-05	2.55882e-05	7.75573e-05	0	0.000245711	2.2369e-05	0.000162786	0.000587739	0.000534111	1.13791e-05	2.32366e-05	5.83472e-05	5-methylthioadenosine/S-adenosylhomocysteine deaminase [EC:3.5.4.31 3.5.4.28]
K13010	0.000827957	0.000840128	0.000851076	0.000820719	0.00084148	0.00085228	0.000852918	0.000853271	0.000908431	0.000854701	0.00100175	0.000856553	0.000837183	0.00148213	0.00143114	0.000854268	0.000852576	0.00089416	perosamine synthetase [EC:2.6.1.102]
K13013	0.000827957	0.000839839	0.0008503	0.000820719	0.00084148	0.00085228	0.000852347	0.000852023	0.000857732	0.000854701	0.000787536	0.000849031	0.000836048	0.000306647	0.000479331	0.000853549	0.000851603	0.000856797	O-antigen biosynthesis protein WbqV
K13015	0	0	0	0	0	0	0	0	0	0	6.93031e-05	3.76115e-06	0	0.000587739	0.000417702	0	4.8663e-07	0	UDP-N-acetyl-D-glucosamine dehydrogenase [EC:1.1.1.136]
K13017	0.000827957	0.000839551	0.000849524	0.000820719	0.00084148	0.00085228	0.000851776	0.000850775	0.000807033	0.000854701	0.000781235	0.000852792	0.000834914	0.000894386	0.000780624	0.00085283	0.000852089	0.000819433	UDP-2-acetamido-2-deoxy-ribo-hexuluronate aminotransferase [EC:2.6.1.98]
K13038	0.000827957	0.000839839	0.0008503	0.000820719	0.00084148	0.00085228	0.000852347	0.000852023	0.000857732	0.000854701	0.000856839	0.000852792	0.000836048	0.000894386	0.000897033	0.000853549	0.000852089	0.000856797	phosphopantothenoylcysteine decarboxylase / phosphopantothenate---cysteine ligase [EC:4.1.1.36 6.3.2.5]
K13039	0.000597885	0.000711399	0.000810857	0.000528372	0.000727741	0.000831457	0.000830927	0.000826435	0.000780175	0.000854701	0.000611128	0.000830423	0.000673263	0.000306647	0.000362922	0.00084217	0.000828853	0.000798449	sulfopyruvate decarboxylase subunit beta [EC:4.1.1.79]
K13040	0.000230072	0.000128153	3.86676e-05	0.000292347	0.000113739	2.08236e-05	2.08482e-05	2.434e-05	2.68584e-05	0	0.000100805	1.86078e-05	0.000161651	0	0	1.06604e-05	2.275e-05	2.09833e-05	two-component system, LuxR family, sensor histidine kinase TtrS [EC:2.7.13.3]
K13280	0.00105803	0.000967992	0.000888968	0.00111307	0.000955219	0.000873104	0.000873195	0.000876363	0.00088459	0.000854701	0.00088834	0.000867639	0.000997699	0.000306647	0.000479331	0.000864209	0.000874353	0.00087778	signal peptidase I [EC:3.4.21.89]
K13288	0	0	0	0	0	0	0	0	0	0	6.93031e-05	3.76115e-06	0	0.000587739	0.000417702	0	4.8663e-07	0	oligoribonuclease [EC:3.1.-.-]
K13327	0	2.88307e-07	7.75939e-07	0	0	0	5.71182e-07	1.2482e-06	5.06989e-05	0	7.56034e-05	0	1.13439e-06	0	0.000116409	7.18677e-07	0	3.73639e-05	dTDP-3,4-didehydro-2,6-dideoxy-alpha-D-glucose 3-reductase [EC:1.1.1.384]
K13380	0	0	0	0	0	0	0	0	0	0	6.93031e-05	3.76115e-06	0	0.000587739	0.000417702	0	4.8663e-07	0	NADH-quinone oxidoreductase subunit B/C/D [EC:1.6.5.3]
K13421	0	0	0	0	0	0	0	0	0	0	6.93031e-05	3.76115e-06	0	0.000587739	0.000417702	0	4.8663e-07	0	uridine monophosphate synthetase [EC:2.4.2.10 4.1.1.23]
K13444	0.000827957	0.000839551	0.000849524	0.000820719	0.00084148	0.00085228	0.000851776	0.000850775	0.000807033	0.000854701	0.000711932	0.000849031	0.000834914	0.000306647	0.000362922	0.00085283	0.000851603	0.000819433	sulfatase modifying factor 1
K13481	0	0	0	0	0	0	0	0	0	0	6.93031e-05	3.76115e-06	0	0.000587739	0.000417702	0	4.8663e-07	0	xanthine dehydrogenase small subunit [EC:1.17.1.4]
K13497	0	0	0	0	0	0	0	0	0	0	6.93031e-05	3.76115e-06	0	0.000587739	0.000417702	0	4.8663e-07	0	anthranilate synthase/phosphoribosyltransferase [EC:4.1.3.27 2.4.2.18]
K13500	0	0	0	0	0	0	0	0	0	0	6.93031e-05	3.76115e-06	0	0.000587739	0.000417702	0	4.8663e-07	0	chondroitin synthase [EC:2.4.1.175 2.4.1.226]
K13525	0.00331183	0.00335907	0.00340043	0.00328287	0.00336592	0.00340912	0.00340882	0.00340684	0.00338023	0.0034188	0.00321314	0.00340365	0.00334306	0.00240206	0.00263632	0.00341348	0.00340738	0.00338982	transitional endoplasmic reticulum ATPase
K13532	0.000460145	0.000256305	7.73353e-05	0.000584693	0.000227478	4.16472e-05	4.16963e-05	4.86799e-05	5.37167e-05	0	0.000201609	3.72156e-05	0.000323302	0	0	2.13208e-05	4.54999e-05	4.19666e-05	two-component system, sporulation sensor kinase D [EC:2.7.13.3]
K13540	0.000597885	0.000711399	0.000810857	0.000528372	0.000727741	0.000831457	0.000830927	0.000826435	0.000780175	0.000854701	0.000611128	0.000830423	0.000673263	0.000306647	0.000362922	0.00084217	0.000828853	0.000798449	precorrin-2 C20-methyltransferase / precorrin-3B C17-methyltransferase [EC:2.1.1.130 2.1.1.131]
K13542	0.000827957	0.000839839	0.0008503	0.000820719	0.00084148	0.00085228	0.000852347	0.000852023	0.000857732	0.000854701	0.000787536	0.000849031	0.000836048	0.000306647	0.000479331	0.000853549	0.000851603	0.000856797	uroporphyrinogen III methyltransferase / synthase [EC:2.1.1.107 4.2.1.75]
K13587	0.000230072	0.000128153	3.86676e-05	0.000292347	0.000113739	2.08236e-05	2.08482e-05	2.434e-05	2.68584e-05	0	0.000100805	1.86078e-05	0.000161651	0	0	1.06604e-05	2.275e-05	2.09833e-05	two-component system, cell cycle sensor histidine kinase and response regulator CckA [EC:2.7.13.3]
K13598	0.00262161	0.00297375	0.00328209	0.00240583	0.0030247	0.00334665	0.00334456	0.00333008	0.00314756	0.0034188	0.00254531	0.0033403	0.0028547	0.00122659	0.00145169	0.00337934	0.00333816	0.00321478	two-component system, NtrC family, nitrogen regulation sensor histidine kinase NtrY [EC:2.7.13.3]
K13613	0	0	0	0	0	0	0	0	0	0	6.93031e-05	3.76115e-06	0	0.000587739	0.000417702	0	4.8663e-07	0	polyketide synthase PksM
K13628	0.000827957	0.000839839	0.0008503	0.000820719	0.00084148	0.00085228	0.000852347	0.000852023	0.000857732	0.000854701	0.000856839	0.000852792	0.000836048	0.000894386	0.000897033	0.000853549	0.000852089	0.000856797	iron-sulfur cluster assembly protein
K13668	0	0	0	0	0	0	0	0	0	0	6.93031e-05	3.76115e-06	0	0.000587739	0.000417702	0	4.8663e-07	0	phosphatidyl-myo-inositol dimannoside synthase [EC:2.4.1.346]
K13722	0.000827957	0.000839839	0.0008503	0.000820719	0.00084148	0.00085228	0.000852347	0.000852023	0.000857732	0.000854701	0.000787536	0.000849031	0.000836048	0.000306647	0.000479331	0.000853549	0.000851603	0.000856797	tricorn protease interacting factor F2/3 [EC:3.4.11.-]
K13766	0	0	0	0	0	0	0	0	0	0	6.93031e-05	3.76115e-06	0	0.000587739	0.000417702	0	4.8663e-07	0	methylglutaconyl-CoA hydratase [EC:4.2.1.18]
K13767	0	0	0	0	0	0	0	0	0	0	0.000138606	7.52231e-06	0	0.00117548	0.000835405	0	9.7326e-07	0	enoyl-CoA hydratase [EC:4.2.1.17]
K13777	0	2.88307e-07	7.75939e-07	0	0	0	5.71182e-07	1.2482e-06	5.06989e-05	0	0.000144907	3.76115e-06	1.13439e-06	0.000587739	0.000534111	7.18677e-07	4.8663e-07	3.73639e-05	geranyl-CoA carboxylase alpha subunit [EC:6.4.1.5]
K13778	0	0	0	0	0	0	0	0	0	0	6.93031e-05	3.76115e-06	0	0.000587739	0.000417702	0	4.8663e-07	0	geranyl-CoA carboxylase beta subunit [EC:6.4.1.5]
K13787	0.000827957	0.000839839	0.0008503	0.000820719	0.00084148	0.00085228	0.000852347	0.000852023	0.000857732	0.000854701	0.000856839	0.000852792	0.000836048	0.000894386	0.000897033	0.000853549	0.000852089	0.000856797	geranylgeranyl diphosphate synthase, type I [EC:2.5.1.1 2.5.1.10 2.5.1.29]
K13789	0	2.88307e-07	7.75939e-07	0	0	0	5.71182e-07	1.2482e-06	5.06989e-05	0	0.000144907	3.76115e-06	1.13439e-06	0.000587739	0.000534111	7.18677e-07	4.8663e-07	3.73639e-05	geranylgeranyl diphosphate synthase, type II [EC:2.5.1.1 2.5.1.10 2.5.1.29]
K13798	0.000827957	0.000839839	0.0008503	0.000820719	0.00084148	0.00085228	0.000852347	0.000852023	0.000857732	0.000854701	0.000856839	0.000852792	0.000836048	0.000894386	0.000897033	0.000853549	0.000852089	0.000856797	DNA-directed RNA polymerase subunit B [EC:2.7.7.6]
K13924	0.000460145	0.000256305	7.73353e-05	0.000584693	0.000227478	4.16472e-05	4.16963e-05	4.86799e-05	5.37167e-05	0	0.000201609	3.72156e-05	0.000323302	0	0	2.13208e-05	4.54999e-05	4.19666e-05	two-component system, chemotaxis family, CheB/CheR fusion protein [EC:2.1.1.80 3.1.1.61]
K13926	0	0	0	0	0	0	0	0	0	0	6.93031e-05	3.76115e-06	0	0.000587739	0.000417702	0	4.8663e-07	0	ribosome-dependent ATPase
K13950	0.000597885	0.000711399	0.000810857	0.000528372	0.000727741	0.000831457	0.000830927	0.000826435	0.000780175	0.000854701	0.000680431	0.000834184	0.000673263	0.000894386	0.000780624	0.00084217	0.000829339	0.000798449	para-aminobenzoate synthetase [EC:2.6.1.85]
K13953	0.00165591	0.00167968	0.0017006	0.00164144	0.00168296	0.00170456	0.00170469	0.00170405	0.00171546	0.0017094	0.00157507	0.00169806	0.0016721	0.000613293	0.000958661	0.0017071	0.00170321	0.00171359	alcohol dehydrogenase, propanol-preferring [EC:1.1.1.1]
K13979	0.000827957	0.000839839	0.0008503	0.000820719	0.00084148	0.00085228	0.000852347	0.000852023	0.000857732	0.000854701	0.000787536	0.000849031	0.000836048	0.000306647	0.000479331	0.000853549	0.000851603	0.000856797	uncharacterized zinc-type alcohol dehydrogenase-like protein [EC:1.-.-.-]
K13990	0	0	0	0	0	0	0	0	0	0	6.93031e-05	3.76115e-06	0	0.000587739	0.000417702	0	4.8663e-07	0	glutamate formiminotransferase / formiminotetrahydrofolate cyclodeaminase [EC:2.1.2.5 4.3.1.4]
K13993	0.00105803	0.000967992	0.000888968	0.00111307	0.000955219	0.000873104	0.000873195	0.000876363	0.00088459	0.000854701	0.00088834	0.000867639	0.000997699	0.000306647	0.000479331	0.000864209	0.000874353	0.00087778	HSP20 family protein
K14058	0.000827957	0.000839551	0.000849524	0.000820719	0.00084148	0.00085228	0.000851776	0.000850775	0.000807033	0.000854701	0.000711932	0.000849031	0.000834914	0.000306647	0.000362922	0.00085283	0.000851603	0.000819433	tRNA 2-thiocytidine biosynthesis protein TtcA
K14067	0	0	0	0	0	0	0	0	0	0	6.93031e-05	3.76115e-06	0	0.000587739	0.000417702	0	4.8663e-07	0	malate-CoA ligase subunit beta [EC:6.2.1.9]
K14165	0.000827957	0.000839839	0.0008503	0.000820719	0.00084148	0.00085228	0.000852347	0.000852023	0.000857732	0.000854701	0.000787536	0.000849031	0.000836048	0.000306647	0.000479331	0.000853549	0.000851603	0.000856797	atypical dual specificity phosphatase [EC:3.1.3.16 3.1.3.48]
K14166	0.000827957	0.000839839	0.0008503	0.000820719	0.00084148	0.00085228	0.000852347	0.000852023	0.000857732	0.000854701	0.000787536	0.000849031	0.000836048	0.000306647	0.000479331	0.000853549	0.000851603	0.000856797	copper transport protein
K14170	0.000827957	0.000839839	0.0008503	0.000820719	0.00084148	0.00085228	0.000852347	0.000852023	0.000857732	0.000854701	0.000787536	0.000849031	0.000836048	0.000306647	0.000479331	0.000853549	0.000851603	0.000856797	chorismate mutase / prephenate dehydratase [EC:5.4.99.5 4.2.1.51]
K14260	0.000827957	0.000839839	0.0008503	0.000820719	0.00084148	0.00085228	0.000852347	0.000852023	0.000857732	0.000854701	0.000926142	0.000856553	0.000836048	0.00148213	0.00131474	0.000853549	0.000852576	0.000856797	alanine-synthesizing transaminase [EC:2.6.1.66 2.6.1.2]
K14335	0	0	0	0	0	0	0	0	0	0	6.93031e-05	3.76115e-06	0	0.000587739	0.000417702	0	4.8663e-07	0	alpha-1,6-mannosyltransferase [EC:2.4.1.-]
K14415	0.000827957	0.000839839	0.0008503	0.000820719	0.00084148	0.00085228	0.000852347	0.000852023	0.000857732	0.000854701	0.000856839	0.000852792	0.000836048	0.000894386	0.000897033	0.000853549	0.000852089	0.000856797	tRNA-splicing ligase RtcB [EC:6.5.1.3]
K14447	0	0	0	0	0	0	0	0	0	0	6.93031e-05	3.76115e-06	0	0.000587739	0.000417702	0	4.8663e-07	0	ethylmalonyl-CoA mutase [EC:5.4.99.63]
K14534	0.000827957	0.000839839	0.0008503	0.000820719	0.00084148	0.00085228	0.000852347	0.000852023	0.000857732	0.000854701	0.000787536	0.000849031	0.000836048	0.000306647	0.000479331	0.000853549	0.000851603	0.000856797	4-hydroxybutyryl-CoA dehydratase / vinylacetyl-CoA-Delta-isomerase [EC:4.2.1.120 5.3.3.3]
K14564	0.000827957	0.000839839	0.0008503	0.000820719	0.00084148	0.00085228	0.000852347	0.000852023	0.000857732	0.000854701	0.000856839	0.000852792	0.000836048	0.000894386	0.000897033	0.000853549	0.000852089	0.000856797	nucleolar protein 56
K14568	0.000827957	0.000839839	0.0008503	0.000820719	0.00084148	0.00085228	0.000852347	0.000852023	0.000857732	0.000854701	0.000787536	0.000849031	0.000836048	0.000306647	0.000479331	0.000853549	0.000851603	0.000856797	rRNA small subunit pseudouridine methyltransferase Nep1 [EC:2.1.1.260]
K14574	0.000827957	0.000839839	0.0008503	0.000820719	0.00084148	0.00085228	0.000852347	0.000852023	0.000857732	0.000854701	0.000856839	0.000852792	0.000836048	0.000894386	0.000897033	0.000853549	0.000852089	0.000856797	ribosome maturation protein SDO1
K14588	0.000827957	0.000839551	0.000849524	0.000820719	0.00084148	0.00085228	0.000851776	0.000850775	0.000807033	0.000854701	0.000711932	0.000849031	0.000834914	0.000306647	0.000362922	0.00085283	0.000851603	0.000819433	blue copper oxidase
K14597	0.000827957	0.000839551	0.000849524	0.000820719	0.00084148	0.00085228	0.000851776	0.000850775	0.000807033	0.000854701	0.000711932	0.000849031	0.000834914	0.000306647	0.000362922	0.00085283	0.000851603	0.000819433	chlorobactene glucosyltransferase
K14645	0	2.88307e-07	7.75939e-07	0	0	0	5.71182e-07	1.2482e-06	5.06989e-05	0	7.56034e-05	0	1.13439e-06	0	0.000116409	7.18677e-07	0	3.73639e-05	serine protease [EC:3.4.21.-]
K14647	0.000827957	0.000839839	0.0008503	0.000820719	0.00084148	0.00085228	0.000852347	0.000852023	0.000857732	0.000854701	0.000787536	0.000849031	0.000836048	0.000306647	0.000479331	0.000853549	0.000851603	0.000856797	minor extracellular serine protease Vpr [EC:3.4.21.-]
K14652	0	0	0	0	0	0	0	0	0	0	0.000138606	7.52231e-06	0	0.00117548	0.000835405	0	9.7326e-07	0	3,4-dihydroxy 2-butanone 4-phosphate synthase / GTP cyclohydrolase II [EC:4.1.99.12 3.5.4.25]
K14654	0.000827957	0.000839839	0.0008503	0.000820719	0.00084148	0.00085228	0.000852347	0.000852023	0.000857732	0.000854701	0.000787536	0.000849031	0.000836048	0.000306647	0.000479331	0.000853549	0.000851603	0.000856797	2,5-diamino-6-(ribosylamino)-4(3H)-pyrimidinone 5-phosphate reductase [EC:1.1.1.302]
K14656	0.000827957	0.000839839	0.0008503	0.000820719	0.00084148	0.00085228	0.000852347	0.000852023	0.000857732	0.000854701	0.000856839	0.000852792	0.000836048	0.000894386	0.000897033	0.000853549	0.000852089	0.000856797	FAD synthetase [EC:2.7.7.2]
K14728	0.000827957	0.000839839	0.0008503	0.000820719	0.00084148	0.00085228	0.000852347	0.000852023	0.000857732	0.000854701	0.000787536	0.000849031	0.000836048	0.000306647	0.000479331	0.000853549	0.000851603	0.000856797	phthiodiolone/phenolphthiodiolone dimycocerosates ketoreductase [EC:1.2.-.-]
K14941	0.000827957	0.000839839	0.0008503	0.000820719	0.00084148	0.00085228	0.000852347	0.000852023	0.000857732	0.000854701	0.000787536	0.000849031	0.000836048	0.000306647	0.000479331	0.000853549	0.000851603	0.000856797	2-phospho-L-lactate guanylyltransferase [EC:2.7.7.68]
K14952	0.000597885	0.000711687	0.000811633	0.000528372	0.000727741	0.000831457	0.000831499	0.000827683	0.000830874	0.000854701	0.000686731	0.000830423	0.000674397	0.000306647	0.000479331	0.000842889	0.000828853	0.000835813	UDP-MurNAc hydroxylase
K14986	0.000597885	0.000711399	0.000810857	0.000528372	0.000727741	0.000831457	0.000830927	0.000826435	0.000780175	0.000854701	0.000611128	0.000830423	0.000673263	0.000306647	0.000362922	0.00084217	0.000828853	0.000798449	two-component system, LuxR family, sensor kinase FixL [EC:2.7.13.3]
K15016	0.00165591	0.00167939	0.00169982	0.00164144	0.00168296	0.00170456	0.00170412	0.0017028	0.00166477	0.0017094	0.00170738	0.00170934	0.00167096	0.00237651	0.00209536	0.00170638	0.00170467	0.00167623	enoyl-CoA hydratase / 3-hydroxyacyl-CoA dehydrogenase [EC:4.2.1.17 1.1.1.35]
K15019	0.000827957	0.000839839	0.0008503	0.000820719	0.00084148	0.00085228	0.000852347	0.000852023	0.000857732	0.000854701	0.000787536	0.000849031	0.000836048	0.000306647	0.000479331	0.000853549	0.000851603	0.000856797	3-hydroxypropionyl-coenzyme A dehydratase [EC:4.2.1.116]
K15036	0.000230072	0.000128441	3.94436e-05	0.000292347	0.000113739	2.08236e-05	2.14193e-05	2.55882e-05	7.75573e-05	0	0.000176408	1.86078e-05	0.000162786	0	0.000116409	1.13791e-05	2.275e-05	5.83472e-05	acetyl-CoA/propionyl-CoA carboxylase [EC:6.4.1.2 6.4.1.3]
K15059	0	0	0	0	0	0	0	0	0	0	6.93031e-05	3.76115e-06	0	0.000587739	0.000417702	0	4.8663e-07	0	2-aminophenol/2-amino-5-chlorophenol 1,6-dioxygenase subunit beta [EC:1.13.11.74 1.13.11.76]
K15067	0	0	0	0	0	0	0	0	0	0	6.93031e-05	3.76115e-06	0	0.000587739	0.000417702	0	4.8663e-07	0	2-aminomuconate deaminase [EC:3.5.99.5]
K15342	0.000460145	0.000256305	7.73353e-05	0.000584693	0.000227478	4.16472e-05	4.16963e-05	4.86799e-05	5.37167e-05	0	0.000201609	3.72156e-05	0.000323302	0	0	2.13208e-05	4.54999e-05	4.19666e-05	CRISP-associated protein Cas1
K15352	0	0	0	0	0	0	0	0	0	0	6.93031e-05	3.76115e-06	0	0.000587739	0.000417702	0	4.8663e-07	0	secreted effector protein PipB2
K15383	0.000827957	0.000839839	0.0008503	0.000820719	0.00084148	0.00085228	0.000852347	0.000852023	0.000857732	0.000854701	0.000856839	0.000852792	0.000836048	0.000894386	0.000897033	0.000853549	0.000852089	0.000856797	MtN3 and saliva related transmembrane protein
K15408	0	0	0	0	0	0	0	0	0	0	0.000138606	7.52231e-06	0	0.00117548	0.000835405	0	9.7326e-07	0	cytochrome c oxidase subunit I+III [EC:1.9.3.1]
K15429	0.00105803	0.000967992	0.000888968	0.00111307	0.000955219	0.000873104	0.000873195	0.000876363	0.00088459	0.000854701	0.00088834	0.000867639	0.000997699	0.000306647	0.000479331	0.000864209	0.000874353	0.00087778	tRNA (guanine37-N1)-methyltransferase [EC:2.1.1.228]
K15449	0.000827957	0.000839839	0.0008503	0.000820719	0.00084148	0.00085228	0.000852347	0.000852023	0.000857732	0.000854701	0.000856839	0.000852792	0.000836048	0.000894386	0.000897033	0.000853549	0.000852089	0.000856797	tRNA wybutosine-synthesizing protein 1 [EC:4.1.3.44]
K15509	0	2.88307e-07	7.75939e-07	0	0	0	5.71182e-07	1.2482e-06	5.06989e-05	0	7.56034e-05	0	1.13439e-06	0	0.000116409	7.18677e-07	0	3.73639e-05	sulfopropanediol 3-dehydrogenase [EC:1.1.1.308]
K15512	0	0	0	0	0	0	0	0	0	0	6.93031e-05	3.76115e-06	0	0.000587739	0.000417702	0	4.8663e-07	0	benzoyl-CoA 2,3-epoxidase subunit B [EC:1.14.13.208]
K15521	0	0	0	0	0	0	0	0	0	0	6.93031e-05	3.76115e-06	0	0.000587739	0.000417702	0	4.8663e-07	0	D-inositol-3-phosphate glycosyltransferase [EC:2.4.1.250]
K15526	0	0	0	0	0	0	0	0	0	0	6.93031e-05	3.76115e-06	0	0.000587739	0.000417702	0	4.8663e-07	0	L-cysteine:1D-myo-inositol 2-amino-2-deoxy-alpha-D-glucopyranoside ligase [EC:6.3.1.13]
K15527	0	0	0	0	0	0	0	0	0	0	6.93031e-05	3.76115e-06	0	0.000587739	0.000417702	0	4.8663e-07	0	cysteate synthase [EC:2.5.1.76]
K15555	0.000230072	0.000128441	3.94436e-05	0.000292347	0.000113739	2.08236e-05	2.14193e-05	2.55882e-05	7.75573e-05	0	0.000384317	2.98913e-05	0.000162786	0.00176322	0.00136952	1.13791e-05	2.42098e-05	5.83472e-05	sulfonate transport system ATP-binding protein [EC:3.6.3.-]
K15578	0.000597885	0.000711399	0.000810857	0.000528372	0.000727741	0.000831457	0.000830927	0.000826435	0.000780175	0.000854701	0.000611128	0.000830423	0.000673263	0.000306647	0.000362922	0.00084217	0.000828853	0.000798449	nitrate/nitrite transport system ATP-binding protein [EC:3.6.3.-]
K15583	0.000230072	0.000128441	3.94436e-05	0.000292347	0.000113739	2.08236e-05	2.14193e-05	2.55882e-05	7.75573e-05	0	0.000176408	1.86078e-05	0.000162786	0	0.000116409	1.13791e-05	2.275e-05	5.83472e-05	oligopeptide transport system ATP-binding protein
K15634	0.000827957	0.000839839	0.0008503	0.000820719	0.00084148	0.00085228	0.000852347	0.000852023	0.000857732	0.000854701	0.000787536	0.000849031	0.000836048	0.000306647	0.000479331	0.000853549	0.000851603	0.000856797	probable phosphoglycerate mutase [EC:5.4.2.12]
K15635	0.000827957	0.000839839	0.0008503	0.000820719	0.00084148	0.00085228	0.000852347	0.000852023	0.000857732	0.000854701	0.000787536	0.000849031	0.000836048	0.000306647	0.000479331	0.000853549	0.000851603	0.000856797	2,3-bisphosphoglycerate-independent phosphoglycerate mutase [EC:5.4.2.12]
K15669	0.00142584	0.00155153	0.00166193	0.00134909	0.00156922	0.00168374	0.00168385	0.00167971	0.00168861	0.0017094	0.00147427	0.00167945	0.00151045	0.000613293	0.000958661	0.00169644	0.00168046	0.00169261	D-glycero-alpha-D-manno-heptose 1-phosphate guanylyltransferase [EC:2.7.7.71]
K15724	0.000827957	0.000839839	0.0008503	0.000820719	0.00084148	0.00085228	0.000852347	0.000852023	0.000857732	0.000854701	0.000787536	0.000849031	0.000836048	0.000306647	0.000479331	0.000853549	0.000851603	0.000856797	iron-sulfur cluster insertion protein
K15736	0.000827957	0.000839839	0.0008503	0.000820719	0.00084148	0.00085228	0.000852347	0.000852023	0.000857732	0.000854701	0.000787536	0.000849031	0.000836048	0.000306647	0.000479331	0.000853549	0.000851603	0.000856797	L-2-hydroxyglutarate oxidase [EC:1.1.3.-]
K15738	0.000230072	0.000128441	3.94436e-05	0.000292347	0.000113739	2.08236e-05	2.14193e-05	2.55882e-05	7.75573e-05	0	0.000384317	2.98913e-05	0.000162786	0.00176322	0.00136952	1.13791e-05	2.42098e-05	5.83472e-05	ABC transport system&#160;ATP-binding/permease protein
K15778	0.000827957	0.000839839	0.0008503	0.000820719	0.00084148	0.00085228	0.000852347	0.000852023	0.000857732	0.000854701	0.000856839	0.000852792	0.000836048	0.000894386	0.000897033	0.000853549	0.000852089	0.000856797	phosphomannomutase / phosphoglucomutase [EC:5.4.2.8 5.4.2.2]
K15785	0.000230072	0.000128153	3.86676e-05	0.000292347	0.000113739	2.08236e-05	2.08482e-05	2.434e-05	2.68584e-05	0	0.000100805	1.86078e-05	0.000161651	0	0	1.06604e-05	2.275e-05	2.09833e-05	L-2,4-diaminobutyrate transaminase [EC:2.6.1.76]
K15866	0	0	0	0	0	0	0	0	0	0	0.000138606	7.52231e-06	0	0.00117548	0.000835405	0	9.7326e-07	0	2-(1,2-epoxy-1,2-dihydrophenyl)acetyl-CoA isomerase [EC:5.3.3.18]
K15879	0	0	0	0	0	0	0	0	0	0	6.93031e-05	3.76115e-06	0	0.000587739	0.000417702	0	4.8663e-07	0	cytochrome b-561
K15888	0.000827957	0.000839839	0.0008503	0.000820719	0.00084148	0.00085228	0.000852347	0.000852023	0.000857732	0.000854701	0.000856839	0.000852792	0.000836048	0.000894386	0.000897033	0.000853549	0.000852089	0.000856797	tritrans,polycis-undecaprenyl-diphosphate synthase [geranylgeranyl-diphosphate specific] [EC:2.5.1.89]
K15894	0.00142584	0.00155124	0.00166116	0.00134909	0.00156922	0.00168374	0.00168327	0.00167846	0.00163791	0.0017094	0.00139866	0.00167945	0.00150931	0.000613293	0.000842252	0.00169572	0.00168046	0.00165525	UDP-N-acetylglucosamine 4,6-dehydratase [EC:4.2.1.115]
K15898	0.000597885	0.000711399	0.000810857	0.000528372	0.000727741	0.000831457	0.000830927	0.000826435	0.000780175	0.000854701	0.000611128	0.000830423	0.000673263	0.000306647	0.000362922	0.00084217	0.000828853	0.000798449	pseudaminic acid synthase [EC:2.5.1.97]
K15904	0	0	0	0	0	0	0	0	0	0	6.93031e-05	3.76115e-06	0	0.000587739	0.000417702	0	4.8663e-07	0	bifunctional N6-L-threonylcarbamoyladenine synthase / protein kinase Bud32 [EC:2.3.1.234 2.7.11.1]
K15912	0.000230072	0.000128441	3.94436e-05	0.000292347	0.000113739	2.08236e-05	2.14193e-05	2.55882e-05	7.75573e-05	0	0.000176408	1.86078e-05	0.000162786	0	0.000116409	1.13791e-05	2.275e-05	5.83472e-05	UDP-N-acetyl-D-glucosamine 4,6-dehydratase [EC:4.2.1.135]
K15916	0.000827957	0.000839839	0.0008503	0.000820719	0.00084148	0.00085228	0.000852347	0.000852023	0.000857732	0.000854701	0.000856839	0.000852792	0.000836048	0.000894386	0.000897033	0.000853549	0.000852089	0.000856797	glucose/mannose-6-phosphate isomerase [EC:5.3.1.9 5.3.1.8]
K15976	0.000597885	0.000711399	0.000810857	0.000528372	0.000727741	0.000831457	0.000830927	0.000826435	0.000780175	0.000854701	0.000611128	0.000830423	0.000673263	0.000306647	0.000362922	0.00084217	0.000828853	0.000798449	putative NAD(P)H nitroreductase [EC:1.-.-.-]
K15977	0.00188599	0.00180754	0.00173849	0.00193378	0.0017967	0.00172538	0.00172497	0.00172714	0.00169162	0.0017094	0.00160027	0.00171667	0.00183261	0.000613293	0.000842252	0.00171704	0.00172596	0.00169721	putative oxidoreductase
K15987	0.000827957	0.000839839	0.0008503	0.000820719	0.00084148	0.00085228	0.000852347	0.000852023	0.000857732	0.000854701	0.000856839	0.000852792	0.000836048	0.000894386	0.000897033	0.000853549	0.000852089	0.000856797	K(+)-stimulated pyrophosphate-energized sodium pump [EC:3.6.1.1]
K16013	0	0	0	0	0	0	0	0	0	0	0.000138606	7.52231e-06	0	0.00117548	0.000835405	0	9.7326e-07	0	ATP-binding cassette, subfamily C, bacterial CydD
K16043	0.000597885	0.000711399	0.000810857	0.000528372	0.000727741	0.000831457	0.000830927	0.000826435	0.000780175	0.000854701	0.000611128	0.000830423	0.000673263	0.000306647	0.000362922	0.00084217	0.000828853	0.000798449	scyllo-inositol 2-dehydrogenase (NAD+) [EC:1.1.1.370]
K16052	0	0	0	0	0	0	0	0	0	0	6.93031e-05	3.76115e-06	0	0.000587739	0.000417702	0	4.8663e-07	0	MscS family membrane protein
K16066	0.000230072	0.000128153	3.86676e-05	0.000292347	0.000113739	2.08236e-05	2.08482e-05	2.434e-05	2.68584e-05	0	0.000100805	1.86078e-05	0.000161651	0	0	1.06604e-05	2.275e-05	2.09833e-05	3-hydroxy acid dehydrogenase / malonic semialdehyde reductase [EC:1.1.1.381 1.1.1.-]
K16165	0	0	0	0	0	0	0	0	0	0	6.93031e-05	3.76115e-06	0	0.000587739	0.000417702	0	4.8663e-07	0	fumarylpyruvate hydrolase [EC:3.7.1.20]
K16173	0	0	0	0	0	0	0	0	0	0	6.93031e-05	3.76115e-06	0	0.000587739	0.000417702	0	4.8663e-07	0	glutaryl-CoA dehydrogenase (non-decarboxylating) [EC:1.3.99.32]
K16177	0	2.88307e-07	7.75939e-07	0	0	0	5.71182e-07	1.2482e-06	5.06989e-05	0	7.56034e-05	0	1.13439e-06	0	0.000116409	7.18677e-07	0	3.73639e-05	monomethylamine corrinoid protein
K16216	0	0	0	0	0	0	0	0	0	0	6.93031e-05	3.76115e-06	0	0.000587739	0.000417702	0	4.8663e-07	0	benzil reductase ((S)-benzoin forming) [EC:1.1.1.320]
K16264	0.000230072	0.000128153	3.86676e-05	0.000292347	0.000113739	2.08236e-05	2.08482e-05	2.434e-05	2.68584e-05	0	0.000100805	1.86078e-05	0.000161651	0	0	1.06604e-05	2.275e-05	2.09833e-05	cobalt-zinc-cadmium efflux system protein
K16305	0	0	0	0	0	0	0	0	0	0	6.93031e-05	3.76115e-06	0	0.000587739	0.000417702	0	4.8663e-07	0	fructose-bisphosphate aldolase / 6-deoxy-5-ketofructose 1-phosphate synthase [EC:4.1.2.13 2.2.1.11]
K16306	0.000827957	0.000839839	0.0008503	0.000820719	0.00084148	0.00085228	0.000852347	0.000852023	0.000857732	0.000854701	0.000787536	0.000849031	0.000836048	0.000306647	0.000479331	0.000853549	0.000851603	0.000856797	fructose-bisphosphate aldolase / 2-amino-3,7-dideoxy-D-threo-hept-6-ulosonate synthase [EC:4.1.2.13 2.2.1.10]
K16317	0	0	0	0	0	0	0	0	0	0	6.93031e-05	3.76115e-06	0	0.000587739	0.000417702	0	4.8663e-07	0	tRNA (pseudouridine54-N1)-methyltransferase [EC:2.1.1.257]
K16417	0	0	0	0	0	0	0	0	0	0	6.93031e-05	3.76115e-06	0	0.000587739	0.000417702	0	4.8663e-07	0	myxalamid-type polyketide synthase MxaC
K16435	0	2.88307e-07	7.75939e-07	0	0	0	5.71182e-07	1.2482e-06	5.06989e-05	0	7.56034e-05	0	1.13439e-06	0	0.000116409	7.18677e-07	0	3.73639e-05	dTDP-4-dehydro-6-deoxy-alpha-D-glucopyranose 2,3-dehydratase [EC:4.2.1.159]
K16786	0.000230072	0.000128153	3.86676e-05	0.000292347	0.000113739	2.08236e-05	2.08482e-05	2.434e-05	2.68584e-05	0	0.000308714	2.98913e-05	0.000161651	0.00176322	0.00125311	1.06604e-05	2.42098e-05	2.09833e-05	energy-coupling factor transport system ATP-binding protein [EC:3.6.3.-]
K16787	0	0	0	0	0	0	0	0	0	0	0.000138606	7.52231e-06	0	0.00117548	0.000835405	0	9.7326e-07	0	energy-coupling factor transport system ATP-binding protein [EC:3.6.3.-]
K16793	0	2.88307e-07	7.75939e-07	0	0	0	5.71182e-07	1.2482e-06	5.06989e-05	0	7.56034e-05	0	1.13439e-06	0	0.000116409	7.18677e-07	0	3.73639e-05	methanogen homoaconitase small subunit [EC:4.2.1.114]
K16843	0	0	0	0	0	0	0	0	0	0	6.93031e-05	3.76115e-06	0	0.000587739	0.000417702	0	4.8663e-07	0	(S)-sulfolactate dehydrogenase [EC:1.1.1.310]
K16856	0.000597885	0.000711399	0.000810857	0.000528372	0.000727741	0.000831457	0.000830927	0.000826435	0.000780175	0.000854701	0.000611128	0.000830423	0.000673263	0.000306647	0.000362922	0.00084217	0.000828853	0.000798449	ureidoglycolate lyase [EC:4.3.2.3]
K16874	0	2.88307e-07	7.75939e-07	0	0	0	5.71182e-07	1.2482e-06	5.06989e-05	0	7.56034e-05	0	1.13439e-06	0	0.000116409	7.18677e-07	0	3.73639e-05	2,5-furandicarboxylate decarboxylase 1
K16881	0.00142584	0.00155124	0.00166116	0.00134909	0.00156922	0.00168374	0.00168327	0.00167846	0.00163791	0.0017094	0.00146797	0.00168321	0.00150931	0.00120103	0.00125995	0.00169572	0.00168094	0.00165525	mannose-1-phosphate guanylyltransferase / phosphomannomutase [EC:2.7.7.13 5.4.2.8]
K16898	0	0	0	0	0	0	0	0	0	0	6.93031e-05	3.76115e-06	0	0.000587739	0.000417702	0	4.8663e-07	0	ATP-dependent helicase/nuclease subunit A [EC:3.1.-.- 3.6.4.12]
K17076	0	0	0	0	0	0	0	0	0	0	6.93031e-05	3.76115e-06	0	0.000587739	0.000417702	0	4.8663e-07	0	putative lysine transport system ATP-binding protein [EC:3.6.3.-]
K17104	0.000827957	0.000839839	0.0008503	0.000820719	0.00084148	0.00085228	0.000852347	0.000852023	0.000857732	0.000854701	0.000856839	0.000852792	0.000836048	0.000894386	0.000897033	0.000853549	0.000852089	0.000856797	phosphoglycerol geranylgeranyltransferase [EC:2.5.1.41]
K17218	0.000827957	0.000839551	0.000849524	0.000820719	0.00084148	0.00085228	0.000851776	0.000850775	0.000807033	0.000854701	0.000711932	0.000849031	0.000834914	0.000306647	0.000362922	0.00085283	0.000851603	0.000819433	sulfide:quinone oxidoreductase [EC:1.8.5.4]
K17247	0.000827957	0.000839551	0.000849524	0.000820719	0.00084148	0.00085228	0.000851776	0.000850775	0.000807033	0.000854701	0.000711932	0.000849031	0.000834914	0.000306647	0.000362922	0.00085283	0.000851603	0.000819433	methionine sulfoxide reductase heme-binding subunit
K17325	0	0	0	0	0	0	0	0	0	0	6.93031e-05	3.76115e-06	0	0.000587739	0.000417702	0	4.8663e-07	0	glycerol transport system ATP-binding protein
K17489	0.000230072	0.000128153	3.86676e-05	0.000292347	0.000113739	2.08236e-05	2.08482e-05	2.434e-05	2.68584e-05	0	0.000239411	2.61301e-05	0.000161651	0.00117548	0.000835405	1.06604e-05	2.37232e-05	2.09833e-05	methylmalonyl-CoA carboxyltransferase 12S subunit [EC:2.1.3.1]
K17686	0.000597885	0.000711399	0.000810857	0.000528372	0.000727741	0.000831457	0.000830927	0.000826435	0.000780175	0.000854701	0.000749734	0.000837945	0.000673263	0.00148213	0.00119833	0.00084217	0.000829826	0.000798449	Cu+-exporting ATPase [EC:3.6.3.54]
K17716	0.000827957	0.000839839	0.0008503	0.000820719	0.00084148	0.00085228	0.000852347	0.000852023	0.000857732	0.000854701	0.000787536	0.000849031	0.000836048	0.000306647	0.000479331	0.000853549	0.000851603	0.000856797	UDP-glucose 4-epimerase [EC:5.1.3.2]
K17734	0.000230072	0.000128441	3.94436e-05	0.000292347	0.000113739	2.08236e-05	2.14193e-05	2.55882e-05	7.75573e-05	0	0.000522924	3.74136e-05	0.000162786	0.0029387	0.00220492	1.13791e-05	2.51831e-05	5.83472e-05	serine protease AprX [EC:3.4.21.-]
K17758	0.00165591	0.00167968	0.0017006	0.00164144	0.00168296	0.00170456	0.00170469	0.00170405	0.00171546	0.0017094	0.00157507	0.00169806	0.0016721	0.000613293	0.000958661	0.0017071	0.00170321	0.00171359	ADP-dependent NAD(P)H-hydrate dehydratase [EC:4.2.1.136]
K17759	0.00248387	0.00251952	0.0025509	0.00246216	0.00252444	0.00255684	0.00255704	0.00255607	0.0025732	0.0025641	0.00236261	0.00254709	0.00250814	0.00091994	0.00143799	0.00256065	0.00255481	0.00257039	NAD(P)H-hydrate epimerase [EC:5.1.99.6]
K17828	0.000827957	0.000839839	0.0008503	0.000820719	0.00084148	0.00085228	0.000852347	0.000852023	0.000857732	0.000854701	0.000787536	0.000849031	0.000836048	0.000306647	0.000479331	0.000853549	0.000851603	0.000856797	dihydroorotate dehydrogenase (NAD+) catalytic subunit [EC:1.3.1.14]
K17830	0.00105803	0.000967992	0.000888968	0.00111307	0.000955219	0.000873104	0.000873195	0.000876363	0.00088459	0.000854701	0.000957643	0.0008714	0.000997699	0.000894386	0.000897033	0.000864209	0.000874839	0.00087778	digeranylgeranylglycerophospholipid reductase [EC:1.3.1.101 1.3.7.11]
K17837	0.000230072	0.000128153	3.86676e-05	0.000292347	0.000113739	2.08236e-05	2.08482e-05	2.434e-05	2.68584e-05	0	0.000100805	1.86078e-05	0.000161651	0	0	1.06604e-05	2.275e-05	2.09833e-05	metallo-beta-lactamase class B [EC:3.5.2.6]
K17884	0.000827957	0.000839839	0.0008503	0.000820719	0.00084148	0.00085228	0.000852347	0.000852023	0.000857732	0.000854701	0.000787536	0.000849031	0.000836048	0.000306647	0.000479331	0.000853549	0.000851603	0.000856797	archaetidylinositol phosphate synthase [EC:2.7.8.39]
K18009	0	2.88307e-07	7.75939e-07	0	0	0	5.71182e-07	1.2482e-06	5.06989e-05	0	7.56034e-05	0	1.13439e-06	0	0.000116409	7.18677e-07	0	3.73639e-05	meso-butanediol dehydrogenase / (S,S)-butanediol dehydrogenase / diacetyl reductase [EC:1.1.1.- 1.1.1.76 1.1.1.304]
K18014	0.000597885	0.000711399	0.000810857	0.000528372	0.000727741	0.000831457	0.000830927	0.000826435	0.000780175	0.000854701	0.000611128	0.000830423	0.000673263	0.000306647	0.000362922	0.00084217	0.000828853	0.000798449	3-aminobutyryl-CoA ammonia-lyase [EC:4.3.1.14]
K18209	0	0	0	0	0	0	0	0	0	0	6.93031e-05	3.76115e-06	0	0.000587739	0.000417702	0	4.8663e-07	0	fumarate reductase (CoM/CoB) subunit A [EC:1.3.4.1]
K18231	0	0	0	0	0	0	0	0	0	0	6.93031e-05	3.76115e-06	0	0.000587739	0.000417702	0	4.8663e-07	0	macrolide transport system ATP-binding/permease protein
K18234	0.000827957	0.000839551	0.000849524	0.000820719	0.00084148	0.00085228	0.000851776	0.000850775	0.000807033	0.000854701	0.000711932	0.000849031	0.000834914	0.000306647	0.000362922	0.00085283	0.000851603	0.000819433	virginiamycin A acetyltransferase [EC:2.3.1.-]
K18235	0.00165591	0.00167939	0.00169982	0.00164144	0.00168296	0.00170456	0.00170412	0.0017028	0.00166477	0.0017094	0.00149947	0.00169806	0.00167096	0.000613293	0.000842252	0.00170638	0.00170321	0.00167623	virginiamycin B lyase [EC:4.2.99.-]
K18244	0	0	0	0	0	0	0	0	0	0	0.000207909	1.12835e-05	0	0.00176322	0.00125311	0	1.45989e-06	0	acyl-CoA dehydrogenase [EC:1.3.99.-]
K18285	0.00165591	0.00167997	0.00170138	0.00164144	0.00168296	0.00170456	0.00170526	0.00170529	0.00176616	0.0017094	0.00178928	0.00170558	0.00167323	0.00178877	0.00191047	0.00170782	0.00170418	0.00175096	aminodeoxyfutalosine synthase [EC:2.5.1.120]
K18287	0	2.88307e-07	7.75939e-07	0	0	0	5.71182e-07	1.2482e-06	5.06989e-05	0	7.56034e-05	0	1.13439e-06	0	0.000116409	7.18677e-07	0	3.73639e-05	2-amino-4,5-dihydroxy-6-oxo-7-(phosphooxy)heptanoate synthase [EC:4.1.2.56]
K18347	0	2.88307e-07	7.75939e-07	0	0	0	5.71182e-07	1.2482e-06	5.06989e-05	0	7.56034e-05	0	1.13439e-06	0	0.000116409	7.18677e-07	0	3.73639e-05	D-specific alpha-keto acid dehydrogenase [EC:1.1.1.-]
K18429	0.000230072	0.000128153	3.86676e-05	0.000292347	0.000113739	2.08236e-05	2.08482e-05	2.434e-05	2.68584e-05	0	0.000100805	1.86078e-05	0.000161651	0	0	1.06604e-05	2.275e-05	2.09833e-05	GDP/UDP-N,N-diacetylbacillosamine 2-epimerase (hydrolysing) [EC:3.2.1.184]
K18430	0.00165591	0.00167968	0.0017006	0.00164144	0.00168296	0.00170456	0.00170469	0.00170405	0.00171546	0.0017094	0.00157507	0.00169806	0.0016721	0.000613293	0.000958661	0.0017071	0.00170321	0.00171359	N,N-diacetyllegionaminate synthase [EC:2.5.1.101]
K18472	0.000230072	0.000128153	3.86676e-05	0.000292347	0.000113739	2.08236e-05	2.08482e-05	2.434e-05	2.68584e-05	0	0.000170108	2.2369e-05	0.000161651	0.000587739	0.000417702	1.06604e-05	2.32366e-05	2.09833e-05	acetyl-CoA/propionyl-CoA carboxylase carboxyl transferase subunit [EC:6.4.1.2 6.4.1.3]
K18532	0.000827957	0.000839839	0.0008503	0.000820719	0.00084148	0.00085228	0.000852347	0.000852023	0.000857732	0.000854701	0.000856839	0.000852792	0.000836048	0.000894386	0.000897033	0.000853549	0.000852089	0.000856797	adenylate kinase [EC:2.7.4.3]
K18588	0.000230072	0.000128153	3.86676e-05	0.000292347	0.000113739	2.08236e-05	2.08482e-05	2.434e-05	2.68584e-05	0	0.000100805	1.86078e-05	0.000161651	0	0	1.06604e-05	2.275e-05	2.09833e-05	coenzyme Q-binding protein COQ10
K18593	0.000827957	0.000839839	0.0008503	0.000820719	0.00084148	0.00085228	0.000852347	0.000852023	0.000857732	0.000854701	0.000787536	0.000849031	0.000836048	0.000306647	0.000479331	0.000853549	0.000851603	0.000856797	4-hydroxybutyryl-CoA synthetase (ADP-forming) [EC:6.2.1.-]
K18594	0.000827957	0.000839839	0.0008503	0.000820719	0.00084148	0.00085228	0.000852347	0.000852023	0.000857732	0.000854701	0.000787536	0.000849031	0.000836048	0.000306647	0.000479331	0.000853549	0.000851603	0.000856797	3-hydroxypropionyl-CoA synthetase (ADP-forming) [EC:6.2.1.-]
K18601	0.000827957	0.000839551	0.000849524	0.000820719	0.00084148	0.00085228	0.000851776	0.000850775	0.000807033	0.000854701	0.000711932	0.000849031	0.000834914	0.000306647	0.000362922	0.00085283	0.000851603	0.000819433	aldehyde dehydrogenase [EC:1.2.1.-]
K18602	0.00142584	0.00155124	0.00166116	0.00134909	0.00156922	0.00168374	0.00168327	0.00167846	0.00163791	0.0017094	0.00139866	0.00167945	0.00150931	0.000613293	0.000842252	0.00169572	0.00168046	0.00165525	malonic semialdehyde reductase [EC:1.1.1.-]
K18603	0.000827957	0.000839839	0.0008503	0.000820719	0.00084148	0.00085228	0.000852347	0.000852023	0.000857732	0.000854701	0.000787536	0.000849031	0.000836048	0.000306647	0.000479331	0.000853549	0.000851603	0.000856797	acetyl-CoA/propionyl-CoA carboxylase [EC:6.4.1.2 6.4.1.3]
K18604	0.000827957	0.000839839	0.0008503	0.000820719	0.00084148	0.00085228	0.000852347	0.000852023	0.000857732	0.000854701	0.000856839	0.000852792	0.000836048	0.000894386	0.000897033	0.000853549	0.000852089	0.000856797	acetyl-CoA/propionyl-CoA carboxylase [EC:6.4.1.2 6.4.1.3]
K18605	0.000827957	0.000839839	0.0008503	0.000820719	0.00084148	0.00085228	0.000852347	0.000852023	0.000857732	0.000854701	0.000787536	0.000849031	0.000836048	0.000306647	0.000479331	0.000853549	0.000851603	0.000856797	biotin carboxyl carrier protein
K18702	0	0	0	0	0	0	0	0	0	0	6.93031e-05	3.76115e-06	0	0.000587739	0.000417702	0	4.8663e-07	0	CoA:oxalate CoA-transferase [EC:2.8.3.19]
K18779	0.000827957	0.000839839	0.0008503	0.000820719	0.00084148	0.00085228	0.000852347	0.000852023	0.000857732	0.000854701	0.000856839	0.000852792	0.000836048	0.000894386	0.000897033	0.000853549	0.000852089	0.000856797	7-cyano-7-deazaguanine tRNA-ribosyltransferase [EC:2.4.2.48]
K18855	0.000827957	0.000839839	0.0008503	0.000820719	0.00084148	0.00085228	0.000852347	0.000852023	0.000857732	0.000854701	0.000787536	0.000849031	0.000836048	0.000306647	0.000479331	0.000853549	0.000851603	0.000856797	UDP-N-acetylglucosamine 3-dehydrogenase [EC:1.1.1.374]
K18882	0.000827957	0.000839839	0.0008503	0.000820719	0.00084148	0.00085228	0.000852347	0.000852023	0.000857732	0.000854701	0.000787536	0.000849031	0.000836048	0.000306647	0.000479331	0.000853549	0.000851603	0.000856797	DNA primase large subunit [EC:2.7.7.-]
K18888	0.000230072	0.000128153	3.86676e-05	0.000292347	0.000113739	2.08236e-05	2.08482e-05	2.434e-05	2.68584e-05	0	0.000100805	1.86078e-05	0.000161651	0	0	1.06604e-05	2.275e-05	2.09833e-05	ATP-binding cassette, subfamily B, multidrug efflux pump
K18889	0	0	0	0	0	0	0	0	0	0	6.93031e-05	3.76115e-06	0	0.000587739	0.000417702	0	4.8663e-07	0	ATP-binding cassette, subfamily B, multidrug efflux pump
K18890	0	0	0	0	0	0	0	0	0	0	6.93031e-05	3.76115e-06	0	0.000587739	0.000417702	0	4.8663e-07	0	ATP-binding cassette, subfamily B, multidrug efflux pump
K18893	0	0	0	0	0	0	0	0	0	0	6.93031e-05	3.76115e-06	0	0.000587739	0.000417702	0	4.8663e-07	0	ATP-binding cassette, subfamily B, multidrug efflux pump
K18911	0.000827957	0.000839839	0.0008503	0.000820719	0.00084148	0.00085228	0.000852347	0.000852023	0.000857732	0.000854701	0.000787536	0.000849031	0.000836048	0.000306647	0.000479331	0.000853549	0.000851603	0.000856797	L-histidine Nalpha-methyltransferase [EC:2.1.1.44]
K18912	0.000827957	0.000839839	0.0008503	0.000820719	0.00084148	0.00085228	0.000852347	0.000852023	0.000857732	0.000854701	0.000787536	0.000849031	0.000836048	0.000306647	0.000479331	0.000853549	0.000851603	0.000856797	gamma-glutamyl hercynylcysteine S-oxide synthase [EC:1.14.99.50]
K19002	0.000230072	0.000128153	3.86676e-05	0.000292347	0.000113739	2.08236e-05	2.08482e-05	2.434e-05	2.68584e-05	0	0.000100805	1.86078e-05	0.000161651	0	0	1.06604e-05	2.275e-05	2.09833e-05	1,2-diacylglycerol 3-alpha-glucosyltransferase [EC:2.4.1.337]
K19068	0	2.88307e-07	7.75939e-07	0	0	0	5.71182e-07	1.2482e-06	5.06989e-05	0	7.56034e-05	0	1.13439e-06	0	0.000116409	7.18677e-07	0	3.73639e-05	UDP-2-acetamido-2,6-beta-L-arabino-hexul-4-ose reductase [EC:1.1.1.367]
K19085	0.000230072	0.000128153	3.86676e-05	0.000292347	0.000113739	2.08236e-05	2.08482e-05	2.434e-05	2.68584e-05	0	0.000100805	1.86078e-05	0.000161651	0	0	1.06604e-05	2.275e-05	2.09833e-05	CRISPR-associated protein Csa1
K19221	0.000827957	0.000839839	0.0008503	0.000820719	0.00084148	0.00085228	0.000852347	0.000852023	0.000857732	0.000854701	0.000787536	0.000849031	0.000836048	0.000306647	0.000479331	0.000853549	0.000851603	0.000856797	cob(I)alamin adenosyltransferase [EC:2.5.1.17]
K19230	0	2.88307e-07	7.75939e-07	0	0	0	5.71182e-07	1.2482e-06	5.06989e-05	0	7.56034e-05	0	1.13439e-06	0	0.000116409	7.18677e-07	0	3.73639e-05	cationic peptide transport system ATP-binding protein
K19294	0.000460145	0.000256305	7.73353e-05	0.000584693	0.000227478	4.16472e-05	4.16963e-05	4.86799e-05	5.37167e-05	0	0.000201609	3.72156e-05	0.000323302	0	0	2.13208e-05	4.54999e-05	4.19666e-05	alginate O-acetyltransferase complex protein AlgI
K19302	0.000827957	0.000839839	0.0008503	0.000820719	0.00084148	0.00085228	0.000852347	0.000852023	0.000857732	0.000854701	0.000787536	0.000849031	0.000836048	0.000306647	0.000479331	0.000853549	0.000851603	0.000856797	undecaprenyl-diphosphatase [EC:3.6.1.27]
K19312	0.000230072	0.000128441	3.94436e-05	0.000292347	0.000113739	2.08236e-05	2.14193e-05	2.55882e-05	7.75573e-05	0	0.000245711	2.2369e-05	0.000162786	0.000587739	0.000534111	1.13791e-05	2.32366e-05	5.83472e-05	acetyl-CoA/propionyl-CoA carboxylase carboxyl transferase subunit [EC:6.4.1.2 6.4.1.3]
K19429	0	2.88307e-07	7.75939e-07	0	0	0	5.71182e-07	1.2482e-06	5.06989e-05	0	7.56034e-05	0	1.13439e-06	0	0.000116409	7.18677e-07	0	3.73639e-05	acetyltransferase EpsM [EC:2.3.1.-]
K19430	0.000827957	0.000839551	0.000849524	0.000820719	0.00084148	0.00085228	0.000851776	0.000850775	0.000807033	0.000854701	0.000711932	0.000849031	0.000834914	0.000306647	0.000362922	0.00085283	0.000851603	0.000819433	pyridoxal phosphate-dependent aminotransferase EpsN [EC:2.6.1.-]
K19465	0.000827957	0.000839551	0.000849524	0.000820719	0.00084148	0.00085228	0.000851776	0.000850775	0.000807033	0.000854701	0.000711932	0.000849031	0.000834914	0.000306647	0.000362922	0.00085283	0.000851603	0.000819433	mitochondrial genome maintenance exonuclease 1 [EC:3.1.-.-]
K19519	0	0	0	0	0	0	0	0	0	0	0.000207909	1.12835e-05	0	0.00176322	0.00125311	0	1.45989e-06	0	transforming growth factor-beta-induced protein
K19548	0.000827957	0.000839551	0.000849524	0.000820719	0.00084148	0.00085228	0.000851776	0.000850775	0.000807033	0.000854701	0.000711932	0.000849031	0.000834914	0.000306647	0.000362922	0.00085283	0.000851603	0.000819433	dihydroanticapsin dehydrogenase [EC:1.1.1.385]
K19576	0.000827957	0.000839839	0.0008503	0.000820719	0.00084148	0.00085228	0.000852347	0.000852023	0.000857732	0.000854701	0.000787536	0.000849031	0.000836048	0.000306647	0.000479331	0.000853549	0.000851603	0.000856797	MFS transporter, DHA1 family, quinolone resistance protein
K19664	0	0	0	0	0	0	0	0	0	0	6.93031e-05	3.76115e-06	0	0.000587739	0.000417702	0	4.8663e-07	0	CDP-2,3-bis-(O-geranylgeranyl)-sn-glycerol synthase [EC:2.7.7.67]
K19712	0.000827957	0.000839839	0.0008503	0.000820719	0.00084148	0.00085228	0.000852347	0.000852023	0.000857732	0.000854701	0.000787536	0.000849031	0.000836048	0.000306647	0.000479331	0.000853549	0.000851603	0.000856797	adenosylcobinamide-phosphate guanylyltransferase [EC:2.7.7.62]
K19715	0	2.88307e-07	7.75939e-07	0	0	0	5.71182e-07	1.2482e-06	5.06989e-05	0	7.56034e-05	0	1.13439e-06	0	0.000116409	7.18677e-07	0	3.73639e-05	8-amino-3,8-dideoxy-alpha-D-manno-octulosonate transaminase [EC:2.6.1.109]
K19721	0.000827957	0.000839839	0.0008503	0.000820719	0.00084148	0.00085228	0.000852347	0.000852023	0.000857732	0.000854701	0.000787536	0.000849031	0.000836048	0.000306647	0.000479331	0.000853549	0.000851603	0.000856797	collagen, type V/XI/XXIV/XXVII, alpha
K19793	0	2.88307e-07	7.75939e-07	0	0	0	5.71182e-07	1.2482e-06	5.06989e-05	0	7.56034e-05	0	1.13439e-06	0	0.000116409	7.18677e-07	0	3.73639e-05	(5-formylfuran-3-yl)methyl phosphate transaminase [EC:2.6.1.108]
K19954	0.000597885	0.000711399	0.000810857	0.000528372	0.000727741	0.000831457	0.000830927	0.000826435	0.000780175	0.000854701	0.000611128	0.000830423	0.000673263	0.000306647	0.000362922	0.00084217	0.000828853	0.000798449	alcohol dehydrogenase [EC:1.1.1.-]
K19966	0	0	0	0	0	0	0	0	0	0	6.93031e-05	3.76115e-06	0	0.000587739	0.000417702	0	4.8663e-07	0	3-sulfinopropanoyl-CoA desulfinase [EC:3.13.1.4]
K19973	0.000597885	0.000711399	0.000810857	0.000528372	0.000727741	0.000831457	0.000830927	0.000826435	0.000780175	0.000854701	0.000680431	0.000834184	0.000673263	0.000894386	0.000780624	0.00084217	0.000829339	0.000798449	manganese/zinc transport system ATP-binding protein [EC:3.6.3.35]
K20035	0	0	0	0	0	0	0	0	0	0	6.93031e-05	3.76115e-06	0	0.000587739	0.000417702	0	4.8663e-07	0	3-(methylthio)propanoyl-CoA dehydrogenase [EC:1.3.8.-]
K20215	0.000827957	0.000839839	0.0008503	0.000820719	0.00084148	0.00085228	0.000852347	0.000852023	0.000857732	0.000854701	0.000787536	0.000849031	0.000836048	0.000306647	0.000479331	0.000853549	0.000851603	0.000856797	diphthine synthase [EC:2.1.1.98]
K20276	0.00151817	0.0012243	0.000966303	0.00169776	0.0011827	0.000914751	0.000914891	0.000925043	0.000938307	0.000854701	0.00108995	0.000904854	0.001321	0.000306647	0.000479331	0.00088553	0.000919853	0.000919746	large repetitive protein
K20429	0.000597885	0.000711399	0.000810857	0.000528372	0.000727741	0.000831457	0.000830927	0.000826435	0.000780175	0.000854701	0.000611128	0.000830423	0.000673263	0.000306647	0.000362922	0.00084217	0.000828853	0.000798449	dTDP-4-amino-4,6-dideoxy-D-glucose transaminase [EC:2.6.1.33]
K20444	0.000230072	0.000128441	3.94436e-05	0.000292347	0.000113739	2.08236e-05	2.14193e-05	2.55882e-05	7.75573e-05	0	0.000176408	1.86078e-05	0.000162786	0	0.000116409	1.13791e-05	2.275e-05	5.83472e-05	O-antigen biosynthesis protein [EC:2.4.1.-]
K20448	0	0	0	0	0	0	0	0	0	0	6.93031e-05	3.76115e-06	0	0.000587739	0.000417702	0	4.8663e-07	0	nicotinate dehydrogenase medium molybdopterin subunit [EC:1.17.1.5]
K20454	0.000827957	0.000839839	0.0008503	0.000820719	0.00084148	0.00085228	0.000852347	0.000852023	0.000857732	0.000854701	0.000787536	0.000849031	0.000836048	0.000306647	0.000479331	0.000853549	0.000851603	0.000856797	2,3-dimethylmalate lyase [EC:4.1.3.32]
K20470	0	0	0	0	0	0	0	0	0	0	6.93031e-05	3.76115e-06	0	0.000587739	0.000417702	0	4.8663e-07	0	trehalose monomycolate/heme transporter
K20487	0.000230072	0.000128153	3.86676e-05	0.000292347	0.000113739	2.08236e-05	2.08482e-05	2.434e-05	2.68584e-05	0	0.000100805	1.86078e-05	0.000161651	0	0	1.06604e-05	2.275e-05	2.09833e-05	two-component system, OmpR family, lantibiotic biosynthesis sensor histidine kinase NisK/SpaK [EC:2.7.13.3]
K20490	0	0	0	0	0	0	0	0	0	0	6.93031e-05	3.76115e-06	0	0.000587739	0.000417702	0	4.8663e-07	0	lantibiotic transport system ATP-binding protein
K20534	0	0	0	0	0	0	0	0	0	0	6.93031e-05	3.76115e-06	0	0.000587739	0.000417702	0	4.8663e-07	0	polyisoprenyl-phosphate glycosyltransferase [EC:2.4.-.-]
K20755	0	0	0	0	0	0	0	0	0	0	0.000138606	7.52231e-06	0	0.00117548	0.000835405	0	9.7326e-07	0	Lys-Lys/Arg-Xaa endopeptidase [EC:3.4.21.121]
K20801	0	0	0	0	0	0	0	0	0	0	6.93031e-05	3.76115e-06	0	0.000587739	0.000417702	0	4.8663e-07	0	L-allo-threonine aldolase [EC:4.1.2.49]
K20906	0	2.88307e-07	7.75939e-07	0	0	0	5.71182e-07	1.2482e-06	5.06989e-05	0	7.56034e-05	0	1.13439e-06	0	0.000116409	7.18677e-07	0	3.73639e-05	2-hydroxyisobutanoyl-CoA mutase large subunit [EC:5.4.99.64]
K20974	0.000230072	0.000128153	3.86676e-05	0.000292347	0.000113739	2.08236e-05	2.08482e-05	2.434e-05	2.68584e-05	0	0.000100805	1.86078e-05	0.000161651	0	0	1.06604e-05	2.275e-05	2.09833e-05	two-component system, sensor histidine kinase [EC:2.7.13.3]
K20977	0.000230072	0.000128153	3.86676e-05	0.000292347	0.000113739	2.08236e-05	2.08482e-05	2.434e-05	2.68584e-05	0	0.000100805	1.86078e-05	0.000161651	0	0	1.06604e-05	2.275e-05	2.09833e-05	two-component system, HptB-dependent secretion and biofilm response regulator
K21029	0.000827957	0.000839839	0.0008503	0.000820719	0.00084148	0.00085228	0.000852347	0.000852023	0.000857732	0.000854701	0.000856839	0.000852792	0.000836048	0.000894386	0.000897033	0.000853549	0.000852089	0.000856797	molybdopterin-synthase adenylyltransferase [EC:2.7.7.80]
K21138	0	2.88307e-07	7.75939e-07	0	0	0	5.71182e-07	1.2482e-06	5.06989e-05	0	7.56034e-05	0	1.13439e-06	0	0.000116409	7.18677e-07	0	3.73639e-05	guanosine-3,5-bis(diphosphate) 3-pyrophosphohydrolase [EC:3.1.7.2]
K21140	0.000827957	0.000839839	0.0008503	0.000820719	0.00084148	0.00085228	0.000852347	0.000852023	0.000857732	0.000854701	0.000787536	0.000849031	0.000836048	0.000306647	0.000479331	0.000853549	0.000851603	0.000856797	sulfur-carrier protein carboxypeptidase [EC:3.4.17.-]
K21147	0.000597885	0.000711687	0.000811633	0.000528372	0.000727741	0.000831457	0.000831499	0.000827683	0.000830874	0.000854701	0.000756034	0.000834184	0.000674397	0.000894386	0.000897033	0.000842889	0.000829339	0.000835813	sulfur-carrier protein adenylyltransferase/sulfurtransferase [EC:2.7.7.80 2.7.7.- 2.8.1.11 2.8.1.-]
K21181	0	0	0	0	0	0	0	0	0	0	6.93031e-05	3.76115e-06	0	0.000587739	0.000417702	0	4.8663e-07	0	MIO-dependent L-tyrosine 2,3-aminomutase [EC:5.4.3.6]
K21210	0	2.88307e-07	7.75939e-07	0	0	0	5.71182e-07	1.2482e-06	5.06989e-05	0	7.56034e-05	0	1.13439e-06	0	0.000116409	7.18677e-07	0	3.73639e-05	NDP-mannose synthase
K21219	0.000827957	0.000839839	0.0008503	0.000820719	0.00084148	0.00085228	0.000852347	0.000852023	0.000857732	0.000854701	0.000787536	0.000849031	0.000836048	0.000306647	0.000479331	0.000853549	0.000851603	0.000856797	hydroxymethylpyrimidine kinase / phosphomethylpyrimidine kinase / thiamine-phosphate diphosphorylase [EC:2.7.1.49 2.7.4.7 2.5.1.3]
K21304	0.000230072	0.000128441	3.94436e-05	0.000292347	0.000113739	2.08236e-05	2.14193e-05	2.55882e-05	7.75573e-05	0	0.000176408	1.86078e-05	0.000162786	0	0.000116409	1.13791e-05	2.275e-05	5.83472e-05	UDP-N-acetylglucosamine---dolichyl-phosphate N-acetylglucosaminyltransferase [EC:2.4.1.153]
K21305	0.000230072	0.000128153	3.86676e-05	0.000292347	0.000113739	2.08236e-05	2.08482e-05	2.434e-05	2.68584e-05	0	0.000100805	1.86078e-05	0.000161651	0	0	1.06604e-05	2.275e-05	2.09833e-05	dolichyl N-acetyl-alpha-D-glucosaminyl phosphate 3-beta-D-2,3-diacetamido-2,3-dideoxy-beta-D-glucuronosyltransferase [EC:2.4.1.335]
K21401	0	0	0	0	0	0	0	0	0	0	6.93031e-05	3.76115e-06	0	0.000587739	0.000417702	0	4.8663e-07	0	menaquinone-9 beta-reductase [EC:1.3.99.38]
K21417	0	0	0	0	0	0	0	0	0	0	0.000138606	7.52231e-06	0	0.00117548	0.000835405	0	9.7326e-07	0	acetoin:2,6-dichlorophenolindophenol oxidoreductase subunit beta [EC:1.1.1.-]
K21430	0.00165591	0.00167968	0.0017006	0.00164144	0.00168296	0.00170456	0.00170469	0.00170405	0.00171546	0.0017094	0.00157507	0.00169806	0.0016721	0.000613293	0.000958661	0.0017071	0.00170321	0.00171359	aldose sugar dehydrogenase [EC:1.1.5.-]
K21449	0.000597885	0.000711399	0.000810857	0.000528372	0.000727741	0.000831457	0.000830927	0.000826435	0.000780175	0.000854701	0.000611128	0.000830423	0.000673263	0.000306647	0.000362922	0.00084217	0.000828853	0.000798449	trimeric autotransporter adhesin
K21479	0.000597885	0.000711399	0.000810857	0.000528372	0.000727741	0.000831457	0.000830927	0.000826435	0.000780175	0.000854701	0.000611128	0.000830423	0.000673263	0.000306647	0.000362922	0.00084217	0.000828853	0.000798449	cobalt-factor III methyltransferase [EC:2.1.1.272]
K21636	0.000827957	0.000839839	0.0008503	0.000820719	0.00084148	0.00085228	0.000852347	0.000852023	0.000857732	0.000854701	0.000787536	0.000849031	0.000836048	0.000306647	0.000479331	0.000853549	0.000851603	0.000856797	ribonucleoside-triphosphate reductase (formate) [EC:1.1.98.6]
K21834	0	0	0	0	0	0	0	0	0	0	6.93031e-05	3.76115e-06	0	0.000587739	0.000417702	0	4.8663e-07	0	dimethylglycine catabolism B
K21885	0.00119577	0.0014228	0.00162171	0.00105674	0.00145548	0.00166291	0.00166185	0.00165287	0.00156035	0.0017094	0.00122226	0.00166085	0.00134653	0.000613293	0.000725843	0.00168434	0.00165771	0.0015969	ArsR family transcriptional regulator, cadmium/lead-responsive transcriptional repressor
K21929	0.00165591	0.00167939	0.00169982	0.00164144	0.00168296	0.00170456	0.00170412	0.0017028	0.00166477	0.0017094	0.00149947	0.00169806	0.00167096	0.000613293	0.000842252	0.00170638	0.00170321	0.00167623	uracil-DNA glycosylase [EC:3.2.2.27]
K21947	0.000827957	0.000839839	0.0008503	0.000820719	0.00084148	0.00085228	0.000852347	0.000852023	0.000857732	0.000854701	0.000856839	0.000852792	0.000836048	0.000894386	0.000897033	0.000853549	0.000852089	0.000856797	tRNA-5-methyluridine54 2-sulfurtransferase [EC:2.8.1.15]
K22010	0.00142584	0.00155095	0.00166038	0.00134909	0.00156922	0.00168374	0.0016827	0.00167721	0.00158721	0.0017094	0.00132306	0.00167945	0.00150818	0.000613293	0.000725843	0.001695	0.00168046	0.00161788	two-component system, response regulator PdtaR
K22012	0.000230072	0.000128441	3.94436e-05	0.000292347	0.000113739	2.08236e-05	2.14193e-05	2.55882e-05	7.75573e-05	0	0.000176408	1.86078e-05	0.000162786	0	0.000116409	1.13791e-05	2.275e-05	5.83472e-05	Ni-sirohydrochlorin a,c-diamide synthase [EC:6.3.5.12]
K22044	0.000597885	0.000711399	0.000810857	0.000528372	0.000727741	0.000831457	0.000830927	0.000826435	0.000780175	0.000854701	0.000611128	0.000830423	0.000673263	0.000306647	0.000362922	0.00084217	0.000828853	0.000798449	moderate conductance mechanosensitive channel
K22168	0	0	0	0	0	0	0	0	0	0	6.93031e-05	3.76115e-06	0	0.000587739	0.000417702	0	4.8663e-07	0	F420H2 dehydrogenase subunit M [EC:1.12.98.3]
K22173	0	2.88307e-07	7.75939e-07	0	0	0	5.71182e-07	1.2482e-06	5.06989e-05	0	7.56034e-05	0	1.13439e-06	0	0.000116409	7.18677e-07	0	3.73639e-05	F420H2:quinone oxidoreductase subunit D [EC:1.1.98.4]
K22179	0.000827957	0.000839839	0.0008503	0.000820719	0.00084148	0.00085228	0.000852347	0.000852023	0.000857732	0.000854701	0.000787536	0.000849031	0.000836048	0.000306647	0.000479331	0.000853549	0.000851603	0.000856797	F420H2:quinone oxidoreductase subunit L [EC:1.1.98.4]
